# Supplementary material for: High density information storage through isotope ratio encoding
Source: Royal Society of Chemistry journal article supplement (doi:10.1039/d4sc03519d), 2024-01-01

## High density information storage through isotope ratio encoding

Petra Sőregi,<sup>a,b</sup> Márton Zwillinger,<sup>a</sup> Lajos Vágó,<sup>c</sup> Márton Csékei,<sup>\*a</sup> and Andras Kotschy<sup>\*a</sup>

<sup>a</sup>Servier Research Institute of Medicinal Chemistry Záhony utca 7, 1031 Budapest, Hungary

<sup>b</sup>Hevesy György PhD School of Chemistry, Eötvös Loránd University,

Pázmány Péter sétány 1/A, 1117 Budapest, Hungary

<sup>c</sup>Kastély u. 49/A, 2045 Törökbálint, Hungary

### Table of Contents

|                                                                                                  |      |
|--------------------------------------------------------------------------------------------------|------|
| 1. Tables and Figures.....                                                                       | S2   |
| 2. Calculations.....                                                                             | S5   |
| 3. General information.....                                                                      | S6   |
| 4. Experimental data.....                                                                        | S7   |
| 4.1 General procedures.....                                                                      | S7   |
| 4.1.1 General procedure 1: Hydroxy-bromo exchange.....                                           | S7   |
| 4.1.2 General procedure 2A: Sonogashira coupling with methyl propargyl ether.....                | S7   |
| 4.1.3 General procedure 2B: Sonogashira coupling with silyl protected alkynes.....               | S7   |
| 4.1.4 General procedure 3: NO <sub>2</sub> to NH <sub>2</sub> group reduction.....               | S8   |
| 4.1.5 General procedure 4A: Hydrogenation reaction.....                                          | S8   |
| 4.1.6 General procedure 4B: Deuteration reaction.....                                            | S8   |
| 4.1.7 General procedure 5A: Acylation reaction.....                                              | S8   |
| 4.1.8 General procedure 5B: Deuteroacylation reaction.....                                       | S8   |
| 4.1.9 General procedure 6: Methyl ester hydrolysis.....                                          | S9   |
| 4.2 Synthetic procedure and analytical data of the newly synthesized compounds in this work..... | S9   |
| 4.3 NMR spectra of newly synthesized compounds.....                                              | S50  |
| 4.4 HR-MS measurements and evaluation of the 1a-1y series.....                                   | S136 |
| 4.4.1 Conditions for HRMS measurements.....                                                      | S136 |
| 4.4.2 HR-MS measurements of 1a-1y.....                                                           | S137 |
| 4.5 HR-MS measurements of prepared mixtures.....                                                 | S144 |
| 4.6 Amide coupling: procedure, HRMS measurements.....                                            | S153 |

## 1. Tables

**Table S1. Selected combination of deuterated building blocks to achieve desired deuteration levels.**

|            | Q <sup>1</sup> | Q <sup>2</sup> | Q <sup>3</sup> | Q <sup>4</sup> | Q <sup>5</sup> | Q <sup>6</sup> | Q <sup>7</sup> |           | Q <sup>1</sup> | Q <sup>2</sup> | Q <sup>3</sup> | Q <sup>4</sup> | Q <sup>5</sup> | Q <sup>6</sup> | Q <sup>7</sup> |
|------------|----------------|----------------|----------------|----------------|----------------|----------------|----------------|-----------|----------------|----------------|----------------|----------------|----------------|----------------|----------------|
| <b>1b</b>  |                |                | 1              |                |                |                |                | <b>1m</b> |                |                | 1              | 8              |                | 3              |                |
| <b>1c</b>  |                |                |                |                | 1              |                | 1              | <b>1n</b> |                |                |                | 8              | 1              | 3              | 1              |
| <b>1d</b>  |                |                | 1              |                | 1              |                | 1              | <b>1o</b> |                | 6              |                | 8              |                |                |                |
| <b>1d*</b> |                |                |                |                |                |                | 3              | <b>1p</b> |                | 6              | 1              | 8              |                |                |                |
| <b>1e</b>  |                |                | 1              |                |                |                | 3              | <b>1q</b> |                | 6              |                | 8              | 1              |                | 1              |
| <b>1f</b>  |                |                |                |                | 1              | 3              | 1              | <b>1r</b> |                | 6              |                | 8              |                | 3              |                |
| <b>1g</b>  |                | 6              |                |                |                |                |                | <b>1s</b> |                | 6              | 1              | 8              |                | 3              |                |
| <b>1h</b>  |                | 6              | 1              |                |                |                |                | <b>1t</b> |                | 6              |                | 8              | 1              | 3              | 1              |
| <b>1i</b>  |                | 6              |                |                | 1              |                | 1              | <b>1u</b> |                | 6              | 1              | 8              | 1              | 3              | 1              |
| <b>1i*</b> |                |                |                | 8              |                |                |                | <b>1v</b> | 4              | 6              |                | 8              |                | 3              |                |
| <b>1j</b>  |                | 6              |                |                |                | 3              |                | <b>1w</b> | 4              | 6              | 1              | 8              |                | 3              |                |
| <b>1k</b>  |                | 6              | 1              |                |                | 3              |                | <b>1x</b> | 4              | 6              |                | 8              | 1              | 3              | 1              |
| <b>1l</b>  |                | 6              |                |                | 1              | 3              | 1              | <b>1y</b> | 4              | 6              | 1              | 8              | 1              | 3              | 1              |

**Table S2. The isotopologue composition of 1a-y calculated from Table S4 and Table S5.**

|            | D0    | D1   | D2   | D3   | D4   | D5   | D6   | D7   | D8   | D9   | D10  | D11  | D12  | D13  | D14  | D15  | D16  | D17  | D18  | D19  | D20  | D21  | D22  | D23  | D24  |
|------------|-------|------|------|------|------|------|------|------|------|------|------|------|------|------|------|------|------|------|------|------|------|------|------|------|------|
| <b>1a</b>  | 100.0 |      |      |      |      |      |      |      |      |      |      |      |      |      |      |      |      |      |      |      |      |      |      |      |      |
| <b>1b</b>  | 3.9   | 96.1 |      |      |      |      |      |      |      |      |      |      |      |      |      |      |      |      |      |      |      |      |      |      |      |
| <b>1c</b>  | 0.5   | 4.7  | 90.8 | 2.3  | 1.6  |      |      |      |      |      |      |      |      |      |      |      |      |      |      |      |      |      |      |      |      |
| <b>1d</b>  | 0.4   | 1.3  | 15.5 | 82.8 |      |      |      |      |      |      |      |      |      |      |      |      |      |      |      |      |      |      |      |      |      |
| <b>1d*</b> | 0.4   | 4.7  | 29.8 | 65.1 |      |      |      |      |      |      |      |      |      |      |      |      |      |      |      |      |      |      |      |      |      |
| <b>1e</b>  | 0.2   | 0.4  | 1.9  | 18.5 | 79.0 |      |      |      |      |      |      |      |      |      |      |      |      |      |      |      |      |      |      |      |      |
| <b>1f</b>  | 0.1   | 0    | 0.2  | 1.7  | 16.1 | 80.2 | 1.6  | 0.2  |      |      |      |      |      |      |      |      |      |      |      |      |      |      |      |      |      |
| <b>1g</b>  | 0     | 0    | 0    | 0    | 0.1  | 0.8  | 99.1 |      |      |      |      |      |      |      |      |      |      |      |      |      |      |      |      |      |      |
| <b>1h</b>  | 0.1   | 0.5  | 0.1  | 0.1  | 0.1  | 0.1  | 4.0  | 94.9 |      |      |      |      |      |      |      |      |      |      |      |      |      |      |      |      |      |
| <b>1i</b>  | 0     | 0    | 0.2  | 0    | 0    | 0.1  | 0.2  | 3.0  | 94.6 | 1.8  |      |      |      |      |      |      |      |      |      |      |      |      |      |      |      |
| <b>1i*</b> | 0     | 0    | 0    | 0.2  | 0.2  | 0.7  | 7.0  | 20.4 | 62.5 | 8.0  | 0.9  | 0.2  |      |      |      |      |      |      |      |      |      |      |      |      |      |
| <b>1j</b>  | 0.1   | 0.1  | 0.0  | 0.1  | 0.1  | 0.1  | 0.3  | 2.4  | 20.2 | 76.6 |      |      |      |      |      |      |      |      |      |      |      |      |      |      |      |
| <b>1k</b>  | 0     | 0    | 0    | 0    | 0    | 0.1  | 0    | 0.5  | 4.2  | 25.4 | 69.9 |      |      |      |      |      |      |      |      |      |      |      |      |      |      |
| <b>1l</b>  | 0     | 0    | 0    | 0    | 0    | 0    | 0.1  | 0.1  | 0.8  | 5.2  | 28.0 | 64.6 | 1.0  | 0.2  | 0.1  |      |      |      |      |      |      |      |      |      |      |
| <b>1m</b>  | 0     | 0    | 0    | 0    | 0    | 0.1  | 0.1  | 0.2  | 0.6  | 2.6  | 10.9 | 32.7 | 48.2 | 3.6  | 0.8  | 0.2  | 0.1  |      |      |      |      |      |      |      |      |
| <b>1n</b>  | 0.1   | 0.1  | 0.1  | 0.2  | 0.1  | 0.1  | 0    | 0.1  | 0.3  | 0.4  | 2.4  | 11.1 | 33.3 | 48.6 | 2.5  | 0.6  | 0.1  |      |      |      |      |      |      |      |      |
| <b>1o</b>  | 0     | 0    | 0    | 0    | 0.2  | 0    | 0    | 0    | 0.2  | 0.3  | 0.6  | 3.2  | 6.1  | 15.2 | 67.9 | 5.0  | 1.1  | 0.2  | 0.1  |      |      |      |      |      |      |
| <b>1p</b>  | 0     | 0    | 0    | 0    | 0    | 0    | 0    | 0    | 0.1  | 0.1  | 0.1  | 0.3  | 1.0  | 5.4  | 20.1 | 61.8 | 8.1  | 2.3  | 0.5  | 0.2  | 0.1  |      |      |      |      |
| <b>1q</b>  | 0     | 0    | 0    | 0    | 0    | 0    | 0    | 0    | 0    | 0    | 0    | 0.2  | 0.2  | 0.3  | 2.1  | 15.6 | 73.9 | 5.8  | 1.6  | 0.2  | 0.1  |      |      |      |      |
| <b>1r</b>  | 0     | 0    | 0    | 0    | 0    | 0    | 0    | 0.1  | 0    | 0.1  | 0.1  | 0.2  | 0.2  | 0.5  | 1.4  | 7.2  | 27.2 | 58.5 | 3.5  | 0.8  | 0.2  | 0.1  |      |      |      |
| <b>1s</b>  | 0     | 0    | 0    | 0    | 0    | 0    | 0    | 0    | 0    | 0    | 0    | 0.1  | 0    | 0.1  | 0.4  | 1.7  | 7.9  | 25.4 | 54.3 | 7.4  | 1.9  | 0.4  | 0.2  | 0.1  |      |
| <b>1t</b>  | 0     | 0    | 0    | 0    | 0    | 0    | 0    | 0.1  | 0.1  | 0.1  | 0    | 0.1  | 0    | 0.1  | 0.1  | 0.2  | 0.8  | 4.5  | 22.0 | 67.8 | 3.0  | 0.8  | 0.1  | 0.1  |      |
| <b>1u</b>  | 0     | 0    | 0    | 0    | 0    | 0    | 0    | 0.1  | 0.1  | 0.1  | 0    | 0.1  | 0    | 0    | 0.1  | 0.3  | 0.5  | 1.4  | 6.9  | 28.2 | 60.0 | 1.5  | 0.5  | 0.2  | 0.1  |
| <b>1v</b>  | 0     | 0    | 0    | 0    | 0    | 0    | 0    | 0    | 0    | 0    | 0    | 0    | 0.1  | 0    | 0.1  | 0.2  | 0.6  | 1.1  | 2.1  | 9.5  | 32.1 | 53.5 | 0.3  | 0.3  | 0.1  |
| <b>1w</b>  | 0     | 0    | 0    | 0    | 0    | 0    | 0    | 0    | 0    | 0    | 0    | 0    | 0.1  | 0    | 0    | 0    | 0    | 0.1  | 0.2  | 1.1  | 6.3  | 28.0 | 64.2 |      |      |
| <b>1x</b>  | 0     | 0    | 0    | 0    | 0    | 0    | 0    | 0    | 0    | 0    | 0    | 0    | 0    | 0    | 0    | 0    | 0.1  | 0.1  | 0.1  | 0.3  | 1.7  | 9.0  | 33.2 | 55.5 |      |
| <b>1y</b>  | 0     | 0    | 0    | 0    | 0    | 0    | 0    | 0    | 0    | 0    | 0    | 0    | 0    | 0    | 0    | 0    | 0    | 0    | 0    | 0.1  | 0.3  | 1.5  | 7.8  | 30.6 | 59.8 |

Table S3. M1-M35 prepared mixtures and their calculated NDPs.

| mixture | Composition                                                                                        | Closest analogue and NDP based on calculated MS fingerprints | NDP of calculated and measured MS fingerprint | Closest analogue and NDP based on measured MS fingerprint                                                 |
|---------|----------------------------------------------------------------------------------------------------|--------------------------------------------------------------|-----------------------------------------------|-----------------------------------------------------------------------------------------------------------|
| M1      | 1i (0.9) – 1n (0.1)                                                                                | M2 0.9982                                                    | M1 1.0000                                     | M2 0.9983                                                                                                 |
| M2      | 1i (0.9) – 1m (0.1)                                                                                | M1 0.9982                                                    | M2 1.0000                                     | M1 0.9982                                                                                                 |
| M3      | 1a (0.9) – 1n (0.1)                                                                                | M4 0.9983                                                    | M3 0.9997                                     | M4 0.9984                                                                                                 |
| M4      | 1a (0.9) – 1m (0.1)                                                                                | M3 0.9983                                                    | M4 0.9998                                     | M3 0.9985                                                                                                 |
| M5      | 1g (0.8) -1h (0.1)- 1n (0.1)                                                                       | M6 0.9981                                                    | M5 0.9998                                     | M6 0.9983                                                                                                 |
| M6      | 1g (0.8) -1h (0.1)- 1m (0.1)                                                                       | M5 0.9981                                                    | M6 0.9995                                     | M5 0.9979                                                                                                 |
| M7      | 1a (0.8) -1b (0.1)- 1n (0.1)                                                                       | M8 0.9981                                                    | M7 0.9987                                     | M8 0.9980                                                                                                 |
| M8      | 1a (0.8) -1b (0.1)- 1m (0.1)                                                                       | M7 0.9981                                                    | M8 0.9991                                     | M7 0.9976                                                                                                 |
| M9      | 1d (0.1) -1l (0.5)- 1m (0.4)                                                                       | M10 0.9975                                                   | M9 0.9998                                     | M10 0.9975                                                                                                |
| M10     | 1d (0.1) -1l (0.5)- 1m (0.3)- 1n (0.1)                                                             | M9 0.9975                                                    | M10 0.9996                                    | M9 0.9968                                                                                                 |
| M11     | 1a (0.1)- 1g (0.7)- 1l (0.1)- 1n (0.1)                                                             | M12 0.9974                                                   | M11 0.9998                                    | M12 0.9971                                                                                                |
| M12     | 1a (0.1)- 1g (0.7)- 1l (0.1)- 1m (0.1)                                                             | M11 0.9974                                                   | M12 0.9999                                    | M11 0.9976                                                                                                |
| M13     | 1a (0.6) – 1b (0.2) – 1n (0.1) – 1u (0.1)                                                          | M14 0.9971                                                   | M13 0.9986                                    | M14 0.9961                                                                                                |
| M14     | 1a (0.6) – 1b (0.2) – 1m (0.1) – 1u (0.1)                                                          | M13 0.9971                                                   | M14 0.9978                                    | 1a (0.7) – 1b (0.1) – 1m (0.1) – 1u (0.1) 0.9958                                                          |
| M15     | 1l (0.9)- 1n (0.1)                                                                                 | M16 0.9981                                                   | M15 0.9999                                    | M16 0.9984                                                                                                |
| M16     | 1l (0.9)- 1m (0.1)                                                                                 | M15 0.9981                                                   | M16 1.0000                                    | M15 0.9979                                                                                                |
| M17     | 1g (0.9)- 1n (0.1)                                                                                 | M18 0.9983                                                   | M17 0.9996                                    | M18 0.9984                                                                                                |
| M18     | 1g (0.9)- 1m (0.1)                                                                                 | M17 0.9983                                                   | M18 0.9998                                    | M17 0.9982                                                                                                |
| M19     | 1g (0.9)- 1l (0.1)                                                                                 | M18 0.9981                                                   | M19 0.9996                                    | M18 0.9982                                                                                                |
| M20     | 1g (0.8) -1f (0.1)- 1n (0.1)                                                                       | M21 0.9980                                                   | M20 0.9998                                    | M21 0.9981                                                                                                |
| M21     | 1g (0.8) -1f (0.1)- 1m (0.1)                                                                       | M20 0.9980                                                   | M21 0.9997                                    | M20 0.9980                                                                                                |
| M22     | 1a (0.9) – 1l (0.1)                                                                                | M4 0.9981                                                    | M22 0.9997                                    | M4 0.9983                                                                                                 |
| M23     | 1b (0.9) – 1n (0.1)                                                                                | M24 0.9982                                                   | M23 0.9997                                    | M24 0.9981                                                                                                |
| M24     | 1b (0.9) – 1m (0.1)                                                                                | M23 0.9982                                                   | M24 0.9998                                    | M23 0.9978                                                                                                |
| M25     | 1c (0.9) – 1n (0.1)                                                                                | M26 0.9981                                                   | M25 0.9998                                    | M26 0.9982                                                                                                |
| M26     | 1c (0.9) – 1m (0.1)                                                                                | M25 0.9981                                                   | M26 0.9998                                    | M25 0.9982                                                                                                |
| M27     | 1h (0.9) – 1n (0.1)                                                                                | M28 0.9982                                                   | M27 0.9995                                    | M28 0.9980                                                                                                |
| M28     | 1h (0.9) – 1m (0.1)                                                                                | M27 0.9982                                                   | M28 0.9997                                    | M27 0.9980                                                                                                |
| M29     | 1h (0.7)- 1n (0.1)- 1u (0.1)- 1x (0.1)                                                             | M30 0.9972                                                   | M29 0.9999                                    | M30 0.9969                                                                                                |
| M30     | 1h (0.7)- 1m (0.1)- 1u (0.1)- 1x (0.1)                                                             | M29 0.9972                                                   | M30 0.9998                                    | M29 0.9970                                                                                                |
| M31     | 1a (0.1) – 1i (0.7) – 1k (0.1) – 1m (0.1)                                                          | M32 0.9973                                                   | M31 0.9986                                    | 1a (0.1) – 1i (0.7) – 1k (0.1) – 1l (0.1) 0.9960                                                          |
| M32     | 1a (0.1) – 1i (0.7) – 1k (0.1) – 1n (0.1)                                                          | M31 0.9973                                                   | M32 0.9988                                    | M31 0.9965                                                                                                |
| M33     | 1b (0.7) – 1m (0.1) – 1v (0.1) – 1y (0.1)                                                          | M34 0.9972                                                   | M33 0.9980                                    | 1b (0.6) – 1m (0.1) – 1v (0.1) – 1y (0.2) 0.9951                                                          |
| M34     | 1b (0.7) – 1n (0.1) – 1v (0.1) – 1y (0.1)                                                          | M33 0.9972                                                   | M34 0.9983                                    | 1b (0.6) – 1n (0.1) – 1v (0.2) – 1y (0.2) 0.9953                                                          |
| M35     | 1a (0.1)- 1b (0.1)- 1e (0.1)- 1i (0.1)- 1l (0.1)- 1n (0.1)- 1r (0.1)- 1s (0.1)- 1v (0.1)- 1y (0.1) | nd                                                           | M35 0.9923                                    | 1a (0.1)- 1b (0.1)- 1e (0.1)- 1i (0.1)- 1l (0.1)- 1m (0.1)- 1r (0.1)- 1s (0.1)- 1v (0.1)- 1y (0.1) 0.9792 |

## 2 Calculations

The program and data input files referenced below are available at <https://github.com/VagoLali/isotopeRatioEncoding>

### Isotopologue distribution of components 1a-y

The composition of **1a-y** were deconvoluted from their measured mass spectra manually by sequential subtraction of the underlying patterns using the theoretical spectra of D<sub>0</sub>-D<sub>24</sub> compounds as elements of the combination. The theoretical spectra of the D<sub>0</sub>-D<sub>24</sub> compounds were calculated using enviPat from Eawag3 available at the <https://envipat.eawag.ch/website>.

### Theoretical spectra of mixtures

The theoretical spectra of each mixture in a study were calculated and stored by the attached python code ("isotopic\_decomposition.py", called "software" from now on). A theoretical spectrum of a given mixture was calculated as a linear combination of the theoretical spectra corresponding to its elements (D<sub>0</sub>-D<sub>24</sub>), weighed by the respective ratios of elements present in the mixture.

For example the mixture **1a**(0.2) – **1b**(0.8) contains  $C1=0.2 \times 1.00 + 0.8 \times 0.039 = 0.2312$  part D<sub>0</sub> compound and  $C2=0.2 \times 0.00 + 0.8 \times 0.961 = 0.7688$  part D<sub>1</sub> compound, whose theoretical spectra should be combined with the above obtained coefficients (C1, C2).

### Similarity of mass spectra

Normalized dot product (also known as spectral contrast angle or cosine similarity) is a commonly used function to measure the similarity between two mass spectra. Normalized dot product (NDP) for mass spectra **A** and **B**, consisting of **k** peaks is given as following:

$$NDP_{A,B} = \frac{\sum_{i=1}^k I_{A,i} \cdot I_{B,i}}{\sqrt{\sum_{i=1}^k I_{A,i}^2 \cdot \sum_{i=1}^k I_{B,i}^2}}$$

Where:

$I_{A,i}$  describes the relative intensity of the  $i^{\text{th}}$  peak in spectrum of **A**

$I_{B,i}$  describes the relative intensity of the  $i^{\text{th}}$  peak in spectrum of **B**

NDP values range from 0-1, where the higher score corresponds to higher similarity.

### Distribution of similarities within a mixing system

The software performs pairwise comparison of theoretical mass spectra via NDP function across all the mixtures within a mixing system. The number of pairs having NDP values in certain ranges (bins) is recorded to create an NDP distribution, which is a useful descriptor of coding quality. The software also reports on the pairs with NDP values over a user defined threshold level as an output to allow further analysis. Pair(s) with the highest NDP value within a mixing system is/are also reported along with the corresponding NDPs.

### Spectrum searching

The software allows for spectrum similarity searching within the library of theoretical spectra in a mixing system, based on pairwise comparison via NDP function. The best 5 hits with the respective NDP values are reported as an output.

### 3 General information

All reagents obtained from commercial sources were used without further purification. Anhydrous solvents were obtained from commercial sources and used without further drying. Nitrogen gas dried on a column of Drierite<sup>®</sup> was used as inert atmosphere. In hydrogenation reactions H<sub>2</sub>/D<sub>2</sub> pressure was provided with a balloon. D<sub>2</sub> gas was obtained directly from a D<sub>2</sub> cylinder (D<sub>2</sub> content: 99.96%). The reactions were monitored using LC-MS and GC-MS instruments. Analytical LC-MS: Agilent HP1200 LC with Agilent 6140 quadrupole MS, operating in positive or negative ion electrospray ionisation mode. Molecular weight scan range was 100 to 1350 m/z. Parallel UV detection was done at 210 nm and 254 nm. Samples were supplied as a 1 mM solution in MeCN with 2  $\mu$ L loop injection, unless stated otherwise. LC-MS analyses were performed on two instruments, one of which was operated with basic, and the other with acidic eluents. Basic LC-MS: Gemini-NX, 3  $\mu$ m, C18, 50 mm  $\times$  3.00 mm i.d. column at 23°C, at a flow rate of 1 mL min<sup>-1</sup> using 5 mM aq. NH<sub>4</sub>HCO<sub>3</sub> solution and MeCN as eluents. Acidic LC-MS: ZORBAX Eclipse XDB-C18, 1.8  $\mu$ m, 50 mm  $\times$  4.6 mm i.d. column at 40°C, at a flow rate of 1 mL min<sup>-1</sup> using water and MeCN as eluents, both containing 0.07 V/V% TFA. Combination gas chromatography and low-resolution mass spectrometry were performed on Agilent 6850 gas chromatograph and Agilent 5975C mass spectrometer using 15 m  $\times$  0.25 mm column with 0.25  $\mu$ m HP-5MS coating and helium as carrier gas. Ion source: EI<sup>+</sup>, 70 eV, 230°C, quadrupole: 150°C, interface: 300°C. Flash chromatography was performed on ISCO CombiFlash Rf 200i or ISCO CombiFlash Torrent<sup>®</sup> with pre-packed silica-gel cartridges (RediSep<sup>®</sup>Rf Gold High Performance). Preparative HPLC purifications were performed on an ISCO CombiFlash EZ Prep system with a Gemini-NX<sup>®</sup> 10  $\mu$ m C18, 250 mm  $\times$  50 mm column running at a flow rate of 118 mL min<sup>-1</sup> with UV diode array detection. <sup>1</sup>H NMR, and proton-decoupled <sup>13</sup>C NMR measurements were performed on Bruker Avance III 500 MHz spectrometer and Bruker Avance III 400 MHz spectrometer, using DMSO-d<sub>6</sub> as solvent. <sup>1</sup>H and <sup>13</sup>C NMR data are in the form of delta values, given in part per million (ppm), using the residual peak of the solvent as internal standard (DMSO-d<sub>6</sub>: 2.50 ppm (<sup>1</sup>H) / 39.5 ppm (<sup>13</sup>C)). Splitting patterns are designated as: s (singlet), d (doublet), t (triplet), m (multiplet), br s (broad singlet), dd (doublet of doublets), dt (doublet of triplets). Solvent peaks are marked with a “▼” sign on the spectra, type of solvent is indicated by “★” if other than water or the deuterated solvent on the spectra. For all intermediates, the <sup>13</sup>C NMR spectrum is only given for the nondeuterated molecules as no significant change in the chemical shift can be observed when deuterated analogues are measured, the presence of deuterium atoms causes only the disappearance of corresponding peaks. For all final compounds (**1a-y**), both <sup>1</sup>H and <sup>13</sup>C NMR spectra are given. In some cases, due to tautomers or amide rotamers two sets of signals appear in the spectra. LC-HRMS were determined on an Agilent 1290 Infinity II - Agilent 6545 LC-QTOF, ion source temperature 200°C, ESI +/-, ionization voltage: +/-4.5 kV. InfinityLab Poroshell 120 SB-C18, 2.1 mm, 1.9  $\mu$ m column. Mass resolution: min. 10000. GC-HRMS were determined on Agilent 7890B gas chromatograph and AccuTOF GCX mass spectrometer using 15 m  $\times$  0.25 mm column with 0.25  $\mu$ m HP-5MS coating and helium as carrier gas. Ion source: FI, 37V, interface: 320°C. Approximately 0.01 mg mL<sup>-1</sup> stock solutions of **1a-y** were prepared in propionitrile with an accuracy of 1% in 100 mL measuring flasks. Mixtures were prepared by measuring the individual components into a vial using Sartorius Tacta mechanical 1-channel pipettes and the volume was adjusted to 1 mL using acetonitrile. Chemical names were generated by BioviaDraw 2021.

## 4 Experimental data

### 4.1 General procedures

#### 4.1.1 General procedure 1: Hydroxy-bromo exchange

A pear-shaped flask equipped with a magnetic stirring bar was filled with **4-hydroxy-quinoline derivative** (1.0 equiv.) and was dissolved in 1,2-dichloroethane (5.00 mL/mmol), then phosphoryl bromide (2.00 equiv.) was added in one portion. The reaction mixture was stirred at 80°C until complete conversion was observed (usually 50 – 120 minutes). The reaction mixture was diluted with DCM, water was added, and the pH was set to neutral with 25% aq. NaOH solution, then the mixture was filtered through a pad of celite. The organic phase was separated from the filtrate and washed with water, dried over Na<sub>2</sub>SO<sub>4</sub>, filtered and the filtrate was concentrated *in vacuo*. Then the crude product was purified via flash chromatography using heptane and DCM as eluents.

#### 4.1.2 General procedure 2A: Sonogashira coupling with methyl propargyl ether

A pear-shaped flask equipped with a magnetic stirring bar was filled with **4,6-dibromo-quinoline derivative** (1.0 equiv.) and copper(I) iodide (0.2 equiv.). The flask was evacuated then back-filled with N<sub>2</sub> (repeated 3 times), then dry, degassed 1,4-dioxane (7.5 mL/mmol), 3-methoxyprop-1-yne (3.0 equiv.) and *N*-isopropylpropan-2-amine (15.0 equiv.) were added at room temperature while stirring. The reaction mixture was heated to 60°C and bis(di-*tert*-butyl(4-dimethylaminophenyl) phosphine) dichloropalladium(II) (0.05 equiv.) was added at this temperature. Then it was stirred at 60°C until complete conversion was observed (usually 0.5 – 3 hours). Then the mixture was diluted with DCM, washed twice with 5% aq. citric acid solution and once with sat. aq. NaHCO<sub>3</sub> solution. The combined aqueous phase was back-extracted twice with DCM. The combined organic phase was dried over Na<sub>2</sub>SO<sub>4</sub>, filtered and the filtrate was concentrated *in vacuo*. Then the crude product was purified via flash chromatography using heptane, DCM and MeOH as eluents.

#### 4.1.3 General procedure 2B: Sonogashira coupling with silyl protected alkynes

A pear-shaped flask equipped with a magnetic stirring bar was filled with the **acetylene derivative** (6.0 equiv.), 2-methyltetrahydrofuran (7.5 mL/mmol) and tetrabutylammonium fluoride trihydrate (6.0 equiv.) and the reaction mixture was stirred at room temperature until complete conversion was observed (usually 18 hours). Then sat. aq. NH<sub>4</sub>Cl solution was added, and the phases were separated. The organic phase was washed twice with sat. aq. NH<sub>4</sub>Cl solution, then the combined aqueous phase was back-extracted twice with 2-methyltetrahydrofuran. The combined organic phase was dried over Na<sub>2</sub>SO<sub>4</sub> and filtered. The filtrate was transferred into a pear-shaped flask, then **4,6-dibromo-quinoline derivative** (1.0 equiv.), copper(I) iodide (0.2 equiv.), bis(di-*tert*-butyl(4-dimethylaminophenyl) phosphine) dichloropalladium(II) (0.05 equiv.), and *N*-isopropylpropan-2-amine (15.0 equiv.) were added. The flask was evacuated then backfilled with N<sub>2</sub> (repeated 3 times), then the reaction mixture was heated to 60°C and stirred at this temperature until complete conversion was observed (usually 1 hour). Then EtOAc was added, and the resulting solution was washed twice with 5% aq. citric acid solution and once with sat. aq. NaHCO<sub>3</sub> solution. The combined aqueous phase was back-extracted twice with EtOAc. The combined organic phase was dried over Na<sub>2</sub>SO<sub>4</sub>, filtered and the filtrate was concentrated *in vacuo*. Then the crude product was purified via flash chromatography using heptane, DCM and MeOH as eluents.

#### 4.1.4 General procedure 3: NO<sub>2</sub> to NH<sub>2</sub> group reduction

A pear-shaped flask equipped with a magnetic stirring bar was filled with **8-nitro-quinoline** derivative (1.0 equiv.), iron (10.0 equiv.), acetic acid (10.0 equiv.) and ethanol (40 mL/mmol, 70% aq. solution). The reaction mixture was stirred at 50°C until complete conversion was observed (usually 2 hours). Then it was cooled to room temperature and the pH was set to 8 with 25 m/m% aq. ammonia solution. The insoluble material was removed by filtration through a pad of celite, then the filtrate was extracted twice with DCM. The organic phase was dried over Na<sub>2</sub>SO<sub>4</sub>, filtered and the filtrate was concentrated *in vacuo*. Then the crude product was purified via flash chromatography using heptane, DCM and MeOH as eluents.

#### 4.1.5 General procedure 4A: Hydrogenation reaction

A pear-shaped flask equipped with a stirring bar was filled with **alkynyl quinoline** derivative (1.0 equiv.) and 10 m/m% Pd/C (0.1 g/g quinoline derivative). The flask was evacuated then back-filled with N<sub>2</sub> (repeated 3 times), then DCM (50 mL/g), MeOH (50 mL/g) and *N,N*-diethylethanamine (10 mL/g) were added. The headspace of the vial was filled with N<sub>2</sub> and evacuated (repeated twice), then filled with hydrogen gas (1 atm) and the reaction mixture was stirred at room temperature until complete conversion was observed (usually 3 – 18 hours). Then it was filtered through a pad of celite and the filtrate was concentrated *in vacuo*. Then the crude product was purified via flash chromatography using heptane, DCM and MeOH as eluents.

#### 4.1.6 General procedure 4B: Deuteration reaction

A pear-shaped flask equipped with a magnetic stirring bar was filled with **alkynyl quinoline** derivative (1.0 equiv.) and 10 m/m% Pd/C (0.1 g/g quinoline derivative). Then the flask was evacuated then backfilled with N<sub>2</sub> (repeated 3 times), then MeOD (25 mL/g) was added. The mixture was sonicated in an ultrasonic bath for 15 minutes, then it was concentrated *in vacuo*. The MeOD addition, sonication and concentration process was repeated 5 times. Then MeOD (50 mL/g quinoline derivative) was added. The headspace of the flask was filled with N<sub>2</sub> and evacuated (repeated twice), then filled with deuterium gas (1 atm) and the reaction mixture was stirred at room temperature until complete conversion was observed (usually 2 – 18 hours). Then it was filtered through a pad of celite and the filtrate was concentrated *in vacuo*. Then the crude product was purified via flash chromatography using heptane, DCM and MeOH as eluents.

#### 4.1.7 General procedure 5A: Acylation reaction

A pear-shaped flask equipped with a magnetic stirring bar was filled with **8-amino-quinoline** derivative (1.0 equiv.), DCM (30 mL/mmol) and *N,N*-diethylethanamine (5 equiv.). The mixture was cooled to 0°C and acetyl chloride (3 equiv.) was added, then the mixture was allowed to warm to room temperature and stirred until complete conversion was observed (usually 1 hour). Then it was washed with water, 1 M aq. HCl solution, sat. aq. NaHCO<sub>3</sub> solution, then dried over Na<sub>2</sub>SO<sub>4</sub>, filtered and the filtrate was concentrated *in vacuo*. Then the crude product was purified via flash chromatography using heptane, DCM and MeOH as eluents.

#### 4.1.8 General procedure 5B: Deuteroacylation reaction

A pear-shaped flask equipped with a magnetic stirring bar was filled with **8-amino-quinoline** derivative (1.0 equiv.), *N,N*-dimethylpyridin-4-amine (0.2 equiv.), pyridine (10 equiv.), and EtOAc (20 mL/mmol). Then (2,2,2-trideuterioacetyl) 2,2,2-trideuterioacetate (3 equiv.) was added and the mixture was stirred at 50°C until complete conversion was observed



(usually 18 hours). Then it was washed with water, 1 M aq. citric acid solution, sat. aq. NaHCO<sub>3</sub> solution, dried over Na<sub>2</sub>SO<sub>4</sub>, filtered and the filtrate was concentrated *in vacuo*. Then the crude product was purified via flash chromatography using DCM and MeOH as eluents.

#### 4.1.9 General procedure 6: Methyl ester hydrolysis

A pear-shaped flask equipped with a magnetic stirring bar was filled with **methyl quinoline-2-carboxylate** derivative (1.0 equiv.) and was dissolved in 1,4-dioxane (100 mL/g). A solution of lithium hydroxide monohydrate (10 equiv.) in water (50 mL/g) was added and the reaction mixture was stirred at room temperature until complete conversion was observed (usually 1 hour). Then the excess lithium hydroxide was quenched by 1 M aq. HCl solution. Then the reaction mixture was diluted with DCM. The pH of the aqueous phase was set to ~5 with 1 M aq. citric acid solution, then the organic phase was separated and washed with 1 M aq. citric acid solution and brine. Then it was dried over Na<sub>2</sub>SO<sub>4</sub>, filtered and the filtrate was concentrated *in vacuo*. Then the crude product was purified via flash chromatography using heptane, DCM and MeOH as eluents. Then the product was further purified by RP-HPLC using 1% aq. HCOOH solution and MeCN as eluents.

## 4.2 Synthetic procedure and analytical data of the newly synthesized compounds in this work

### ***tert*-butyl-diphenyl-(3-tetrahydropyran-2-yloxyprop-1-ynyl)silane (15)**

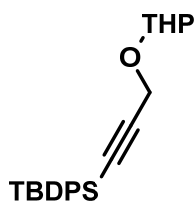

In a 1000 mL pear-shaped flask equipped with a magnetic stirring bar and a thermometer, 25.00 mL **2-prop-2-ynoxyltetrahydropyran** (1.0 equiv., 177.8 mmol.) was dissolved in 178 mL dry, degassed tetrahydrofuran (1 mL/mmol 2-prop-2-ynoxyltetrahydropyran) and the mixture was cooled to -78°C under N<sub>2</sub> atmosphere. A solution of 75 mL *n*-butyllithium (1.05 equiv., 186.7 mmol, 2.5 mol/L in hexanes) was added to the mixture dropwise, and the mixture was warmed to room temperature.

Then it was stirred for 90 minutes and was cooled to -30°C again. Then 47.74 mL ***tert*-butyl-chloro-diphenyl-silane** (1.05 equiv., 186.7 mmol) was added to the mixture dropwise and was warmed to room temperature and stirred overnight. Then the mixture was quenched by 50 mL 1 M aq. HCl solution, extracted with 150 mL EtOAc three times. The combined organic phase was washed with 50 mL brine, dried over Na<sub>2</sub>SO<sub>4</sub>, filtered and the filtrate was concentrated *in vacuo*. Then the crude product was purified via flash chromatography using heptane and DCM as eluents to afford 51.28 g ***tert*-butyl-diphenyl-(3-tetrahydropyran-2-yloxyprop-1-ynyl)silane (8)** (135.5 mmol, 76%) as a colourless oil.

<sup>1</sup>H NMR (400 MHz, [D<sub>6</sub>]DMSO): δ 7.77-7.70 (m, 4H, Ar-H), 7.49-7.40 (m, 6H, Ar-H), 4.88 (t, *J* = 3.0 Hz, 1H, CH), 4.44 (dt, *J* = 16.6 Hz, *J* = 10.2 Hz, 2H, CH<sub>2</sub>), 3.82-3.74 (m, 1H, CH<sub>2</sub>), 3.50-3.41 (m, 2H, CH<sub>2</sub>), 1.79-1.62 (m, 2H, CH<sub>2</sub>), 1.57-1.40 (m, 4H, CH<sub>2</sub>), 1.02 (s, 9H, CH<sub>3</sub>). <sup>13</sup>C NMR (100 MHz, [D<sub>6</sub>]DMSO): δ 135.1, 132.3, 129.9, 128.1, 107.2, 96.4, 85.1, 61.5, 54.4, 29.9, 26.8, 24.9, 18.9, 18.0. HRMS (GC-FI): *m/z* [M<sup>+</sup>] calcd for C<sub>24</sub>H<sub>30</sub>O<sub>2</sub>Si: 378.2015; found: 378.2011.

### 3-[*tert*-butyl(diphenyl)silyl]prop-2-yn-1-ol (8)

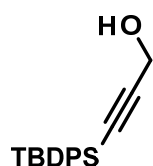

To a 1000 mL pear-shaped flask equipped with a magnetic stirring bar 50.00 g ***tert*-butyl-diphenyl-(3-tetrahydropyran-2-yloxyprop-1-ynyl)silane** (1.0 equiv., 132.1 mmol), 264 mL methanol (2 mL/mmol *tert*-butyl-diphenyl-(3-tetrahydropyran-2-yloxyprop-1-ynyl)silane) and 227 mg 4-methylbenzenesulfonic acid (0.01 equiv., 1.321 mmol) were added and the mixture was stirred at room temperature for 1 hour.

Then the reaction mixture was diluted with 200 mL EtOAc, washed with brine, dried over Na<sub>2</sub>SO<sub>4</sub>, filtered and the filtrate was concentrated *in vacuo*. Then the crude product was purified via flash chromatography using heptane and EtOAc as eluents to afford 33.72 g **3-[*tert*-butyl(diphenyl)silyl]prop-2-yn-1-ol** (91% purity, 104.2 mmol, 79%) as a white solid.

<sup>1</sup>H NMR (400 MHz, [D<sub>6</sub>]DMSO): δ 7.80-7.71 (m, 4H, Ar-H), 7.49-7.38 (m, 6H, Ar-H), 5.44 (t, *J* = 6.0 Hz, 1H, OH), 4.27 (d, *J* = 6.0 Hz, 2H, CH<sub>2</sub>), 1.02 (s, 9H, CH<sub>3</sub>). <sup>13</sup>C NMR (100 MHz, [D<sub>6</sub>]DMSO): δ 135.2, 132.6, 129.8, 128.0, 111.2, 82.4, 49.7, 26.8, 18.0. HRMS (GC-FI): *m/z* [M+H]<sup>+</sup> calcd for C<sub>19</sub>H<sub>22</sub>OSi: 294.1440; found: 294.1444.

### *tert*-butyl-(3-methoxyprop-1-ynyl)-diphenyl-silane (16)

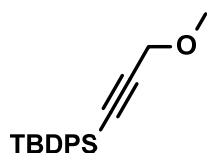

A 100 mL pear-shaped flask equipped with a magnetic stirring bar was filled with 3.846 g **3-[*tert*-butyl(diphenyl)silyl]prop-2-yn-1-ol** (91% purity, 1.0 equiv., 6.180 mmol), dissolved in 15.5 mL dry, degassed tetrahydrofuran (2.5 mL/mmol 3-[*tert*-butyl(diphenyl)silyl]prop-2-yn-1-ol) and 0.462 mL iodomethane (1.2 equiv., 7.716 mmol), then 309 mg sodium hydride (60% dispersion in mineral

oil, 1.25 equiv., 7.73 mmol) was added in portions. The reaction mixture was stirred at room temperature for 1 hour. Then the excess sodium hydride was quenched with 5 mL 1 M HCl, then 50 mL EtOAc was added and the phases were separated. Then the organic phase was washed with 25 mL brine solution, dried over Na<sub>2</sub>SO<sub>4</sub>, filtered and the filtrate was concentrated *in vacuo*. Then the crude product was purified via flash chromatography using DCM and MeOH as eluents to afford 1.756 g ***tert*-butyl-(3-methoxyprop-1-ynyl)-diphenyl-silane** (5.692 mmol, 92%) as a colourless oil.

<sup>1</sup>H NMR (400 MHz, [D<sub>6</sub>]DMSO): δ 7.78-7.73 (m, 4H, Ar-H), 7.49-7.39 (m, 6H, Ar-H), 4.31 (s, 2H, CH<sub>2</sub>), 3.37 (s, 3H, OCH<sub>3</sub>), 1.03 (s, 9H, CH<sub>3</sub>). <sup>13</sup>C NMR (100 MHz, [D<sub>6</sub>]DMSO): δ 135.1, 132.3, 129.9, 128.0, 107.0, 85.5, 59.7, 57.0, 26.8, 18.0. HRMS (ESI): *m/z* [M+NH<sub>4</sub>]<sup>+</sup> calcd for C<sub>20</sub>H<sub>24</sub>OSi: 326.1935; found: 326.1927.

### *tert*-butyl-diphenyl-[3-(trideuteriomethoxy)prop-1-ynyl]silane (17)

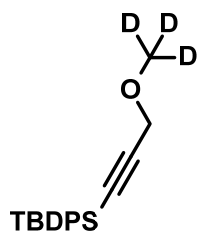

A 500 mL pear-shaped flask equipped with a magnetic stirring bar was filled with 21.98 g **3-[*tert*-butyl(diphenyl)silyl]prop-2-yn-1-ol** (91% purity, 67.91 mmol, 1 equiv.), dissolved in 170 mL dry, degassed tetrahydrofuran (2.5 mL/mmol 3-[*tert*-butyl(diphenyl)silyl]prop-2-yn-1-ol) and 5.072 mL trideuterio(iodo)methane (81.49 mmol, 1.2 equiv.), then 3.395 g sodium hydride (60% dispersion in mineral oil, 84.89 mmol, 1.25 equiv.) was added in portions. The reaction mixture was stirred at room

temperature for 1 hour. Then the excess sodium hydride was quenched with 50 mL 1 M HCl, then 500 mL EtOAc was added. Then the phases were separated, and the organic phase was washed with 150 mL brine, dried over Na<sub>2</sub>SO<sub>4</sub>, filtered and the filtrate was concentrated *in vacuo*. Then the crude product was purified via flash chromatography using heptane and EtOAc as eluents to afford 19.24 g ***tert*-butyl-diphenyl-[3-(trideuteriomethoxy)prop-1-ynyl]silane** (61.75 mmol, 91%) as a colourless oil.

<sup>1</sup>H NMR (400 MHz, [D<sub>6</sub>]DMSO): δ 7.79-7.72 (m, 4H, Ar-H), 7.49-7.39 (m, 6H, Ar-H), 4.31 (s, 2H, CH<sub>2</sub>), 1.03 (s, 9H, CH<sub>3</sub>). <sup>13</sup>C NMR (100 MHz, [D<sub>6</sub>]DMSO): δ 135.1, 132.3, 129.9, 128.0, 107.1, 85.4, 59.6, 26.8, 18.0. HRMS (ESI): *m/z* [M+NH<sub>4</sub>]<sup>+</sup> calcd for C<sub>20</sub>D<sub>3</sub>H<sub>21</sub>OSi: 329.2123; found: 329.2116.

### 3-[*tert*-butyl(diphenyl)silyl]prop-2-ynoic acid (18)

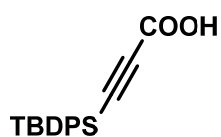

In a 1000 mL pear-shaped flask 20.00 g **3-[*tert*-butyl(diphenyl)silyl]prop-2-yn-1-ol** (90% purity, 1.0 equiv., 61.12 mmol) was dissolved in 611 mL acetone (10 mL/mmol **3-[*tert*-butyl(diphenyl)silyl]prop-2-yn-1-ol**). Then the reaction mixture was cooled to 0°C and 73.2 mL trioxochromium, sulfuric acid (1:1) (1.67 M, 2 equiv., 122.2 mmol, freshly prepared: 12.5 g CrO<sub>3</sub>

was dissolved in a mixture of 13 mL of cc. H<sub>2</sub>SO<sub>4</sub> and 62 mL water) was added dropwise to the solution. A green precipitate was formed. The reaction mixture was allowed to warm to room temperature and stirred at this temperature for 1 hour. Then the reaction mixture was concentrated *in vacuo*, the residue was extracted with 3 × 100 mL EtOAc, the combined organic phase was washed with water and brine, dried over Na<sub>2</sub>SO<sub>4</sub>, filtered and the filtrate was concentrated *in vacuo*. Then the crude product was purified via flash chromatography using heptane and EtOAc as eluents to afford 13.77 g **3-[*tert*-butyl(diphenyl)silyl]prop-2-ynoic acid** (44.64 mmol, 73%) as an off-white solid.

<sup>1</sup>H NMR (500 MHz, [D<sub>6</sub>]DMSO): δ 14.20 (br s, 1H, COOH), 7.77-7.69 (m, 4H, Ar-H), 7.53-7.44 (m, 6H, Ar-H), 1.05 (s, 9H, CH<sub>3</sub>). <sup>13</sup>C NMR (125 MHz, [D<sub>6</sub>]DMSO): δ 153.4, 135.1, 130.8, 130.4, 128.3, 100.2, 86.2, 59.8, 26.6, 20.8, 18.1. HRMS (ESI): *m/z* [M-H]<sup>-</sup> calcd for C<sub>19</sub>H<sub>19</sub>O<sub>2</sub>Si: 307.1160; found: 307.1159.

### methyl 3-[*tert*-butyl(diphenyl)silyl]prop-2-ynoate (19)

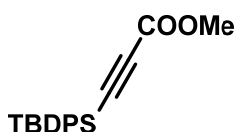

A 1000 mL pear-shaped flask equipped with magnetic stirring bar was filled with 12.00 g **3-[*tert*-butyl(diphenyl)silyl]prop-2-ynoic acid** (1.0 equiv., 38.91 mmol) dissolved in 389 mL dichloromethane (10 mL/mmol 3-[*tert*-butyl(diphenyl)silyl]prop-2-ynoic acid) and methanol (10 mL/mmol 3-[*tert*-butyl(diphenyl)silyl]prop-2-ynoic acid). Without closing the flask, 39 mL

**diazomethyl(trimethyl)silane** (2.0 M in hexanes, 2.0 equiv., 77.8 mmol) was added slowly, while the flask was cooled in an ice bath. Then the reaction mixture was stirred at this temperature for 1 hour. Then the excess diazomethyl(trimethyl)silane was quenched by adding glacial acetic acid until the gas evolution stopped. Then the reaction mixture was concentrated *in vacuo*. Then the crude product was purified via flash chromatography using heptane, DCM and MeOH as eluents to afford 11.79 g **methyl 3-[*tert*-butyl(diphenyl)silyl]prop-2-ynoate** (36.55 mmol, 94%) as a white, crystalline solid.

<sup>1</sup>H NMR (500 MHz, [D<sub>6</sub>]DMSO): δ 7.74-7.69 (m, 4H, Ar-H), 7.54-7.44 (m, 6H, Ar-H), 3.79 (s, 3H, C(O)OCH<sub>3</sub>), 1.05 (s, 9H, CH<sub>3</sub>). <sup>13</sup>C NMR (125 MHz, [D<sub>6</sub>]DMSO): δ 152.4, 135.1, 130.5, 130.4, 128.4, 98.4, 88.4, 53.3, 26.6, 18.1. HRMS (GC-FI): *m/z* [M<sup>+</sup>] calcd for C<sub>20</sub>H<sub>22</sub>O<sub>2</sub>Si: 322.1389; found: 322.1387.

### 3-[*tert*-butyl(diphenyl)silyl]-1,1-dideuterio-prop-2-yn-1-ol (9)

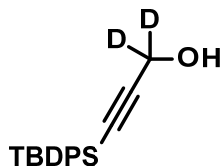

To a 1000 mL pear-shaped flask equipped with a magnetic stirring bar 10.00 g **methyl 3-[*tert*-butyl(diphenyl)silyl]prop-2-ynoate** (1.0 equiv., 31.00 mmol) and 620 mL dry, degassed THF (20 ml/mmol methyl 3-[*tert*-butyl(diphenyl)silyl]prop-2-ynoate) were measured, then the mixture was cooled to -78°C. At this temperature 13.40 g lithium aluminum deuteride (1.2 equiv., 37.20 mmol) was added to the mixture in portions during a 10-minute period, then the reaction mixture was

stirred at -78°C for 10 minutes (Low temperature and proper dilution is necessary to avoid by-product formation). Then the reaction mixture was warmed to -30°C and 14 mL water was added slowly, then 14 mL 15% aq. NaOH solution and 42 mL water were added. The reaction mixture was warmed to room temperature, MgSO<sub>4</sub> was added and stirred for 30 minutes, then filtered and the filtrate was concentrated *in vacuo*. Then the crude product was purified via flash chromatography using heptane and EtOAc as eluents to afford 6.872 g **3-[*tert*-butyl(diphenyl)silyl]-1,1-dideuterio-**

**prop-2-yn-1-ol** (23.17 mmol, 75%) as a colourless oil.

$^1\text{H}$  NMR (500 MHz,  $[\text{D}_6]\text{DMSO}$ ):  $\delta$  7.77-7.73 (m, 4H, Ar-H), 7.46-7.41 (m, 6H, Ar-H), 5.39 (s, 1H, OH), 1.02 (s, 9H,  $\text{CH}_3$ ).  $^{13}\text{C}$  NMR (125 MHz,  $[\text{D}_6]\text{DMSO}$ ):  $\delta$  135.1, 132.6, 129.8, 127.9, 111.2, 82.4, 26.8, 18.0. HRMS (GC-FI):  $m/z$   $[\text{M}^+]$  calcd for  $\text{C}_{19}\text{D}_2\text{H}_{20}\text{OSi}$ : 296.1565; found: 296.1565.

#### ***tert*-butyl-[3,3-dideuterio-3-(trideuteriomethoxy)prop-1-ynyl]-diphenyl-silane (20)**

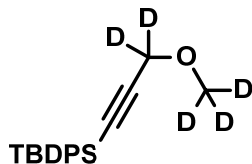

A 250 mL pear-shaped flask equipped with a magnetic stirring bar was filled with 6.000 g **3-[*tert*-butyl(diphenyl)silyl]-1,1-dideuterio-prop-2-yn-1-ol** (1.0 equiv., 20.24 mmol), dissolved in 51 mL dry, degassed tetrahydrofuran (2.5 mL/mmol 3-[*tert*-butyl(diphenyl)silyl]-1,1-dideuterio-prop-2-yn-1-ol) and 1.51 mL **trideuterio(iodo)methane** (1.2 equiv., 24.29 mmol), then 1.012 g sodium hydride (60% dispersion in mineral oil, 1.25 equiv., 25.30 mmol) was added in portions. The reaction mixture was stirred at room temperature for 1 hour until. Then the excess sodium hydride was quenched with 10 mL 1 M HCl, then 100 mL EtOAc was added and the phases were separated. Then the organic phase was washed with 25 mL brine, dried over  $\text{Na}_2\text{SO}_4$ , filtered and the filtrate was concentrated *in vacuo*. Then the crude product was purified via flash chromatography using heptane and EtOAc as eluents to afford 4.650 g ***tert*-butyl-[3,3-dideuterio-3-(trideuteriomethoxy)prop-1-ynyl]-diphenyl-silane** (14.54 mmol, 72%) as a colourless oil.

$^1\text{H}$  NMR (400 MHz,  $[\text{D}_6]\text{DMSO}$ ):  $\delta$  7.78-7.73 (m, 4H, Ar-H), 7.49-7.42 (m, 6H, Ar-H), 1.03 (s, 9H,  $\text{CH}_3$ ).  $^{13}\text{C}$  NMR (100 MHz,  $[\text{D}_6]\text{DMSO}$ ):  $\delta$  135.1, 132.3, 129.9, 128.0, 85.4, 26.8, 18.0. HRMS (ESI):  $m/z$   $[\text{M}+\text{NH}_4]^+$  calcd for  $\text{C}_{20}\text{D}_5\text{H}_{19}\text{OSi}$ : 331.2254; found: 331.2250.

#### **methyl 4,6-dibromo-8-nitro-quinoline-2-carboxylate (4a)**

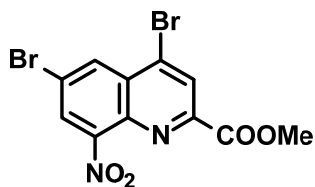

Using **General Procedure 1** and 20.75 g **methyl 6-bromo-4-hydroxy-8-nitro-quinoline-2-carboxylate** (83% purity, 1.0 equiv., 63.44 mmol prepared as described by Zwillinger *et al.*<sup>[1]</sup>), 16.42 g **methyl 4,6-dibromo-8-nitro-quinoline-2-carboxylate** was obtained as a pale yellow solid (42.10 mmol, 66%).

$^1\text{H}$  NMR (500 MHz,  $[\text{D}_6]\text{DMSO}$ ):  $\delta$  8.84 (d,  $J = 1.9$  Hz, 1H, Ar-H), 8.58 (d,  $J = 1.9$  Hz, 1H, Ar-H), 8.56 (s, 1H, Ar-H), 3.96 (s, 3H,  $\text{CH}_3$ ).  $^{13}\text{C}$  NMR (125 MHz,  $[\text{D}_6]\text{DMSO}$ ):  $\delta$  163.3, 149.3, 148.9, 137.2, 134.0, 131.8, 129.8, 128.1, 127.3, 122.3, 53.3. HRMS (ESI):  $m/z$   $[\text{M}+\text{H}]^+$  calcd for  $\text{C}_{11}\text{H}_6\text{Br}_2\text{N}_2\text{O}_4$ : 388.8767; found: 388.8760.

1 M. Zwillinger, P. S. Reddy, B. Wicher, P. K. Mandal, M. Csékei, L. Fisher, A. Kotschy, I. Huc, *Chem. Eur. J.* 2020, **26**, 72, 17366-17370.

### dimethyl (Z)-2-(4-bromo-2-nitro-anilino)-3-deuterio-but-2-enedioate (2b)

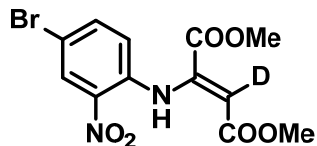

A 500 mL, pear-shaped flask equipped with a magnetic stirring bar was filled with 25.00 g **4-bromo-2-nitro-aniline** (1.0 equiv., 115.2 mmol), 115 mL dry, degassed DCM and 25 mL D<sub>2</sub>O. The mixture was stirred vigorously for 10 minutes. The organic layer was separated and stirred for 10 minutes with a fresh portion of 25 mL D<sub>2</sub>O. The organic phase was separated, dried over Na<sub>2</sub>SO<sub>4</sub>, filtered and the filtrate was concentrated *in vacuo*. The content of the flask was transferred into a 250 mL three-necked round-bottom flask and 46.8 mL dry, degassed MeOD was added. The flask was fitted with a reflux condenser and a dropping funnel containing 21.2 mL **dimethyl but-2-ynedioate** (1.5 equiv., 172 mmol). The mixture was heated to 60°C and the dimethyl but-2-ynedioate was added slowly. After 48 hours of stirring 70% conversion was reached (no further conversion could be reached by longer reaction times). Then the mixture was cooled to 0°C while stirring vigorously. The formed crystals were filtered under dry N<sub>2</sub> atmosphere on a G3 frit and washed twice with 20 mL ice-cold MeOD, then dried *in vacuo* to yield 25.83 g **dimethyl (Z)-2-(4-bromo-2-nitro-anilino)-3-deuterio-but-2-enedioate** (71.95 mmol, 62%) as yellow crystals.

<sup>1</sup>H NMR (500 MHz, [D<sub>6</sub>]DMSO): δ 10.81 (s, 1H, NH), 8.30 (d, *J* = 2.4 Hz, 1H, Ar-H), 7.82 (dd, *J* = 8.8 Hz, *J* = 2.3 Hz, 1H, Ar-H), 6.89 (d, *J* = 8.8 Hz, 1H, Ar-H), 3.74 (s, 3H, C(O)OCH<sub>3</sub>), 3.73 (s, 1H, C(O)OCH<sub>3</sub>). <sup>13</sup>C NMR (125 MHz, [D<sub>6</sub>]DMSO): δ 167.6, 163.2, 143.1, 138.3, 137.7, 135.2, 128.1, 123.3, 113.6, 102.3, 53.5, 51.9. HRMS (ESI): *m/z* [M+H]<sup>+</sup> calcd for C<sub>12</sub>DH<sub>10</sub>BrN<sub>2</sub>O<sub>6</sub>: 359.9936, found: 359.9921.

### methyl 6-bromo-3-deuterio-4-hydroxy-8-nitro-quinoline-2-carboxylate (3b)

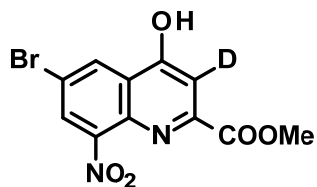

A 500 mL pear-shaped flask equipped with a magnetic stirring bar was filled with dry N<sub>2</sub>, 143.9 g **di-phosphorus pentoxide** (12.2 equiv., 1014 mmol), closed with a rubber septum and 18.34 mL **deuterated water** (12.2 equiv., 1014 mmol) was slowly added while the flask was cooled in an ice bath. After the excessive heat evolution ceased, the mixture was heated to 250°C for 2 hours (until it became homogeneous), then cooled to 150°C. Then 30.00 g **dimethyl (Z)-2-(4-bromo-2-nitro-anilino)-3-deuterio-but-2-enedioate** (1.0 equiv., 83.07 mmol) was added while stirring vigorously. The reaction mixture was stirred at 150°C for 5 h. Then the reaction mixture was cooled to room temperature and leached by sonication with 500 mL water. The pH was set to 7–8 by adding 25% aq. NaOH solution while stirring. Ice was added to keep the temperature below 30°C. The crude product was filtered and washed with 50 mL cold water then dried on air to afford 17.01 g **methyl 6-bromo-3-deuterio-4-hydroxy-8-nitro-quinoline-2-carboxylate** (72% purity, 37.33 mmol, 45%) as brown crystals.

<sup>1</sup>H NMR (500 MHz, [D<sub>6</sub>]DMSO): δ 8.61 (br s, 1H, OH), 8.56/7.79 (d, *J* = 1.6 Hz, 1H, Ar-H), 7.71/7.47 (d/dd, *J* = 8.7 Hz, *J* = 1.9 Hz, 1H, Ar-H), 3.94/3.93 (s/s, 3H, C(O)OCH<sub>3</sub>) (Presence of tautomers!). HRMS (ESI): *m/z* [M+H]<sup>+</sup> calcd for C<sub>11</sub>DH<sub>6</sub>BrN<sub>2</sub>O<sub>5</sub>: 327.9674; found: 326.9674.

### methyl 4,6-dibromo-3-deuterio-8-nitro-quinoline-2-carboxylate (4b)

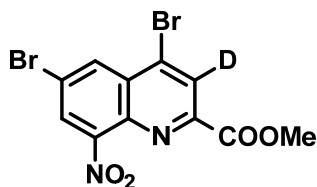

Using **General Procedure 1** and 17.00 g **methyl 6-bromo-3-deuterio-4-hydroxy-8-nitro-quinoline-2-carboxylate** (72% purity, 1.0 equiv., 37.31 mmol), 7.689 g **methyl 4,6-dibromo-3-deuterio-8-nitro-quinoline-2-carboxylate** was obtained as a pale yellow solid (19.67 mmol, 53%).

<sup>1</sup>H NMR (500 MHz, [D<sub>6</sub>]DMSO): δ 8.84 (d, *J* = 2.0 Hz, 1H, Ar-H), 8.58 (d, *J* = 2.0 Hz, 1H, Ar-H), 3.96 (s, 3H, C(O)OCH<sub>3</sub>). HRMS (ESI): *m/z* [M+H]<sup>+</sup> calcd for C<sub>11</sub>DH<sub>5</sub>Br<sub>2</sub>N<sub>2</sub>O<sub>4</sub>: 389.8830; found: 389.8829.

#### 4-bromo-2,3,5-trideuterio-6-nitro-aniline (5)

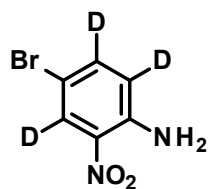

A 1000 mL pear-shaped flask equipped with a magnetic stirring bar was filled with 30.50 g **2,3,4,5-tetradeuterio-6-nitro-aniline** (1.0 equiv., 214.6 mmol, prepared as described by Zwillinger *et al.*<sup>[2]</sup>) and 215 mL acetic acid (1 mL/mmol **2,3,4,5-tetradeuterio-6-nitro-aniline**), heated to 50°C, then 38.19 g *N*-bromo succinimide (1.00 equiv., 214.6 mmol) was added during a 45 minute period. Then the reaction mixture was heated for further 45 minutes. Then it was poured onto 1000 mL ice-cold

water, filtered, and washed with 3×100 mL ice-cold water. The filtered crystals were dried *in vacuo* to give 47.21 g **4-bromo-2,3,5-trideuterio-6-nitro-aniline** (210.4 mmol, 98%) as an orange solid.

<sup>1</sup>H NMR (500 MHz, [D<sub>6</sub>]DMSO): δ 7.58 (s, 2H, NH<sub>2</sub>). <sup>13</sup>C NMR (125 MHz, [D<sub>6</sub>]DMSO): δ 145.3, 130.5, 104.8. HRMS (EI): *m/z* [M<sup>+</sup>] calcd for C<sub>6</sub>D<sub>3</sub>H<sub>2</sub>BrN<sub>2</sub>O<sub>2</sub>: 218.9723; found: 218.9718.

#### dimethyl (Z)-2-(4-bromo-2,3,5-trideuterio-6-nitro-anilino)but-2-enedioate (6a)

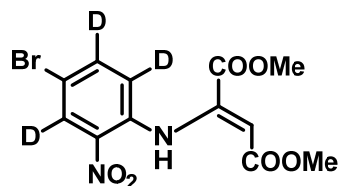

A 500 mL, 3-necked round-bottom flask equipped with a magnetic stirring bar was filled with 35.00 g **4-bromo-2-nitro-aniline** (1.0 equiv., 159.1 mmol) and 79.5 mL dry, degassed MeOH. The flask was fitted with a reflux condenser and a dropping funnel containing 24.4 mL **dimethyl but-2-ynedioate** (1.25 equiv., 199 mmol). The mixture was heated to 60°C and the dimethyl but-2-ynedioate was added slowly. After 8 days

of stirring 76% conversion was reached (no further conversion could be reached by longer reaction times). Then the mixture was cooled to 0°C while stirring vigorously. The formed crystals were filtered on a G3 frit and washed twice with 30 mL ice-cold MeOH, then dried *in vacuo* to yield 39.46 g **dimethyl (Z)-2-(4-bromo-2,3,5-trideuterio-6-nitro-anilino)but-2-enedioate** (106.8 mmol, 67%) as yellow crystals.

<sup>1</sup>H NMR (500 MHz, [D<sub>6</sub>]DMSO): δ 10.82 (s, 1H, NH), 5.84 (s, 1H, CH), 3.74 (s, 3H, C(O)OCH<sub>3</sub>), 3.73 (s, 3H, C(O)OCH<sub>3</sub>). <sup>13</sup>C NMR (125 MHz, [D<sub>6</sub>]DMSO): δ 167.6, 163.2, 143.2, 138.2, 135.1, 113.4, 102.3, 53.5, 51.9. HRMS (ESI): *m/z* [M+H]<sup>+</sup> calcd for C<sub>12</sub>D<sub>3</sub>H<sub>8</sub>BrN<sub>2</sub>O<sub>6</sub>: 362.0062, found: 362.0064.

#### methyl 6-bromo-5,7-dideuterio-4-hydroxy-8-nitro-quinoline-2-carboxylate (7a)

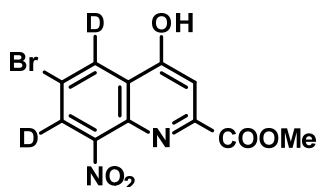

A 500 mL pear-shaped flask equipped with a magnetic stirring bar was filled with dry N<sub>2</sub>, 95.63 g di-phosphorus pentoxide (12.2 equiv., 673.8 mmol), closed with a rubber septum and 12.14 mL water (12.2 equiv., 673.8 mmol) was slowly added while the flask was cooled in an ice bath. After the excessive heat evolution ceased, the mixture was heated to 250°C for 2 hours (until it became homogeneous), then cooled to 150°C. Then 20.00 g

**dimethyl (Z)-2-(4-bromo-2,3,5-trideuterio-6-nitro-anilino)but-2-enedioate** (1.0 equiv., 55.23 mmol) was added while stirring vigorously. The reaction mixture was stirred at 150°C for 5 hours. Then the reaction mixture was cooled to room temperature and leached by sonication with 500 mL water. The pH was set to 7–8 by adding 25% aq. NaOH solution while stirring. Ice was added to keep the temperature below 30°C. The crude product was filtered and washed with 50 mL cold water then dried on air to afford 13.31 g **methyl 6-bromo-5,7-dideuterio-4-hydroxy-8-nitro-quinoline-2-carboxylate** (81% purity, 32.87 mmol, 59%) as brown crystals.

<sup>1</sup>H NMR (400 MHz, [D<sub>6</sub>]DMSO): δ 7.06 (br s, 1H, Ar-H), 3.94 (s, 3H, C(O)OCH<sub>3</sub>). HRMS (ESI): *m/z* [M+H]<sup>+</sup> calcd for

[2] M. Zwillinger, L. Fischer, G. Sályi, S. Szabó, M. Csékei, I. Huc, A. Kotschy, *J Am Chem Soc* **2022**, *144*, 19078–19088.

C<sub>11</sub>D<sub>2</sub>H<sub>5</sub>BrN<sub>2</sub>O<sub>5</sub>: 328.9737; found: 328.9734.

#### methyl 4,6-dibromo-5,7-dideuterio-8-nitro-quinoline-2-carboxylate (4c)

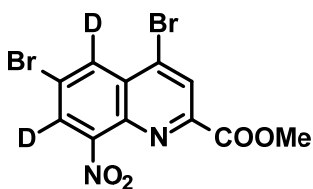

Using **General Procedure 1** and 6.500 g **methyl 6-bromo-5,7-dideuterio-4-hydroxy-8-nitro-quinoline-2-carboxylate** (81% purity, 12.46 mmol, 1.0 equiv.), 2.474 g **methyl 4,6-dibromo-5,7-dideuterio-8-nitro-quinoline-2-carboxylate** was obtained as a pale yellow solid (6.310 mmol, 49%).

<sup>1</sup>H NMR (500 MHz, [D<sub>6</sub>]DMSO): δ 8.56 (s, 1H, Ar-H), 3.95 (s, 3H, C(O)OCH<sub>3</sub>). HRMS (ESI): *m/z* [M+H]<sup>+</sup> calcd for C<sub>11</sub>D<sub>2</sub>H<sub>4</sub>Br<sub>2</sub>N<sub>2</sub>O<sub>4</sub>: 390.8893; found: 390.8894.

#### dimethyl (Z)-2-(4-bromo-2,3,5-trideuterio-6-nitro-anilino)-3-deuterio-but-2-enedioate (6b)

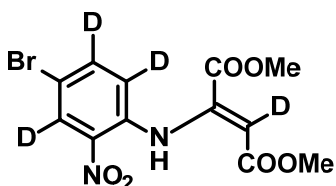

A 500 mL, pear-shaped flask equipped with a magnetic stirring bar was filled with 20.00 g **4-bromo-2,3,5-trideuterio-6-nitro-aniline** (1.0 equiv., 91.34 mmol), 90 mL dry, degassed DCM and 25 mL D<sub>2</sub>O. The mixture was stirred vigorously for 10 minutes. The organic layer was separated and stirred for 10 minutes with a fresh portion of 33 mL D<sub>2</sub>O. The organic phase was separated, dried over Na<sub>2</sub>SO<sub>4</sub>, filtered and the filtrate was

concentrated *in vacuo*. The content of the flask was transferred into a 250 mL three-necked round-bottom flask and 36.95 mL dry, degassed MeOD was added. The flask was fitted with a reflux condenser and a dropping funnel containing 36.95 mL **dimethyl but-2-ynedioate** (1.5 equiv., 135.9 mmol). The mixture was heated to 60°C and the dimethyl but-2-ynedioate was added slowly. After 48 hours of stirring 80% conversion was reached (no further conversion could be reached by longer reaction times). Then the mixture was cooled to 0°C while stirring vigorously. The formed crystals were filtered under dry N<sub>2</sub> atmosphere on a G3 frit and washed twice with 20 mL ice-cold MeOD, then dried *in vacuo* to yield 24.69 g **dimethyl (Z)-2-(4-bromo-2,3,5-trideuterio-6-nitro-anilino)-3-deuterio-but-2-enedioate** (68.19 mmol, 75%) as yellow crystals.

<sup>1</sup>H NMR (400 MHz, [D<sub>6</sub>]DMSO): δ 10.82 (s, 1H, NH/ND), 3.74 (s, 3H, CH<sub>3</sub>), 3.73 (s, 3H, CH<sub>3</sub>). <sup>13</sup>C NMR (100 MHz, [D<sub>6</sub>]DMSO): δ 167.5, 163.2, 142.9, 138.1, 135.0, 113.4, 53.5, 51.9. HRMS (ESI): *m/z* [M+H]<sup>+</sup> calcd for C<sub>12</sub>D<sub>4</sub>H<sub>7</sub>BrN<sub>2</sub>O<sub>6</sub>: 363.0124, found: 363.0127.

#### methyl 6-bromo-3,5,7-trideuterio-4-hydroxy-8-nitro-quinoline-2-carboxylate (7b)

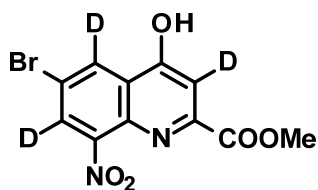

A 250 mL pear-shaped flask equipped with a magnetic stirring bar was filled with dry N<sub>2</sub>, 4.026 g **di-phosphorus pentoxide** (12.2 equiv., 201.0 mmol), closed with a rubber septum and 12.4 mL **deuterated water** (12.2 equiv., 201.0 mmol) was slowly added while the flask was cooled in an ice bath. After the excessive heat evolution ceased, the mixture was heated to 250°C for 2 hours (until it became homogeneous), then cooled to 150°C

and 6.000 g **dimethyl (Z)-2-(4-bromo-2,3,5-trideuterio-6-nitro-anilino)-3-deuterio-but-2-enedioate** (1.0 equiv, 16.48 mmol) was added while stirring vigorously. The reaction mixture was stirred at 150°C for 5 h. Then the reaction mixture was cooled to room temperature and leached by sonication with 500 mL water. The pH was set to 7-8 by adding 25% aq. NaOH solution while stirring. Ice was added to keep the temperature below 30°C. The crude product was filtered and washed with 50 mL cold water then dried on air to afford 4.722 g **methyl 6-bromo-3,5,7-trideuterio-4-hydroxy-8-nitro-quinoline-2-carboxylate** (79% purity, 11.30 mmol, 69%) as brown crystals.

<sup>1</sup>H NMR (400 MHz, [D<sub>6</sub>]DMSO): δ 3.95 (s, 3H, C(O)OCH<sub>3</sub>). HRMS (ESI): *m/z* [M+H]<sup>+</sup> calcd for C<sub>11</sub>D<sub>3</sub>H<sub>4</sub>BrN<sub>2</sub>O<sub>5</sub>: 329.9799;

found: 329.9796.

#### methyl 4,6-dibromo-3,5,7-trideuterio-8-nitro-quinoline-2-carboxylate (4d)

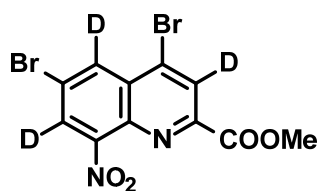

Using **General Procedure 1** and 4.700 g methyl 6-bromo-3,5,7-trideuterio-4-hydroxy-8-nitro-quinoline-2-carboxylate (79% purity, 11.28 mmol, 1.0 equiv.), 3.121 g methyl 4,6-dibromo-3,5,7-trideuterio-8-nitro-quinoline-2-carboxylate was obtained as pale yellow crystals (7.040 mmol, 70%).

$^1\text{H NMR}$  (400 MHz,  $[\text{D}_6]\text{DMSO}$ ):  $\delta$  3.96 (s, 3H, C(O)OCH<sub>3</sub>). HRMS (ESI):  $m/z$   $[\text{M}+\text{H}]^+$  calcd for C<sub>11</sub>D<sub>3</sub>H<sub>3</sub>Br<sub>2</sub>N<sub>2</sub>O<sub>4</sub>: 391.8955; found: 391.8956.

#### methyl 4,6-bis(3-methoxyprop-1-ynyl)-8-nitro-quinoline-2-carboxylate (11a)

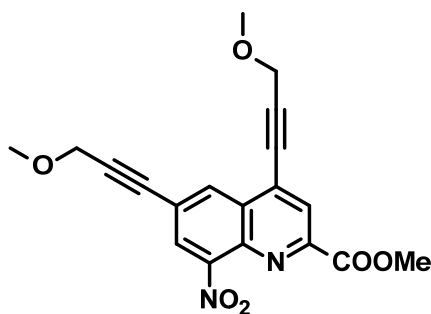

Using **General Procedure 2A** and 2.000 g methyl 4,6-dibromo-8-nitro-quinoline-2-carboxylate (5.128 mmol, 1.0 equiv.), 1.571 g methyl 4,6-bis(3-methoxyprop-1-ynyl)-8-nitro-quinoline-2-carboxylate was obtained as pale brown crystals (4.266 mmol, 83%).

$^1\text{H NMR}$  (500 MHz,  $[\text{D}_6]\text{DMSO}$ ):  $\delta$  8.58 (d,  $J$  = 1.8 Hz, 1H, Ar-H), 8.46 (d,  $J$  = 1.8 Hz, 1H, Ar-H), 8.29 (s, 1H, Ar-H), 4.59 (s, 2H, CH<sub>2</sub>), 4.45 (s, 2H, CH<sub>2</sub>), 3.95 (s, 3H, C(O)OCH<sub>3</sub>), 3.44 (s, 3H, OCH<sub>3</sub>), 3.39 (s, 3H, C(O)OCH<sub>3</sub>).  $^{13}\text{C NMR}$  (125 MHz,  $[\text{D}_6]\text{DMSO}$ ):  $\delta$  163.8, 149.6, 148.9, 137.3, 131.3, 130.2, 128.5, 126.7, 125.6, 122.4, 99.6, 91.2, 83.5, 79.9, 59.7, 59.5, 57.5, 57.3, 53.2. HRMS (ESI):  $m/z$   $[\text{M}+\text{H}]^+$  calcd for C<sub>19</sub>H<sub>16</sub>N<sub>2</sub>O<sub>6</sub>: 369.1081; found: 369.1084.

#### methyl 3-deuterio-4,6-bis(3-methoxyprop-1-ynyl)-8-nitro-quinoline-2-carboxylate (11b)

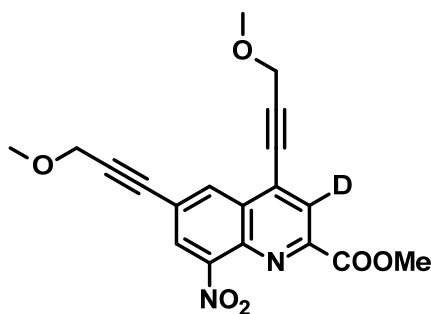

Using **General Procedure 2A** and 4,500 g methyl 4,6-dibromo-3-deuterio-8-nitro-quinoline-2-carboxylate (11.51 mmol, 1.0 equiv.), 2.106 g methyl 3-deuterio-4,6-bis(3-methoxyprop-1-ynyl)-8-nitro-quinoline-2-carboxylate was obtained as pale brown crystals (5.702 mmol, 50%).

$^1\text{H NMR}$  (400 MHz,  $[\text{D}_6]\text{DMSO}$ ):  $\delta$  8.60 (d,  $J$  = 1.8 Hz, 1H, Ar-H), 8.47 (d,  $J$  = 1.8 Hz, 1H, Ar-H), 4.60 (s, 2H, CH<sub>2</sub>), 4.45 (s, 2H, CH<sub>2</sub>), 3.95 (s, 3H, C(O)OCH<sub>3</sub>), 3.44 (s, 3H, OCH<sub>3</sub>), 3.39 (s, 3H, OCH<sub>3</sub>). HRMS (ESI):  $m/z$   $[\text{M}+\text{H}]^+$  calcd for C<sub>19</sub>DH<sub>15</sub>N<sub>2</sub>O<sub>6</sub>: 370.1144; found: 370.1145

#### methyl 5,7-dideuterio-4,6-bis(3-methoxyprop-1-ynyl)-8-nitro-quinoline-2-carboxylate (11c)

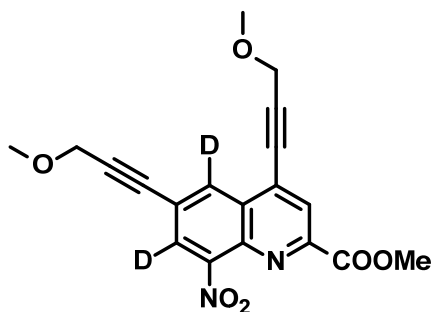

Using **General Procedure 2A** and 1.600 g methyl 4,6-dibromo-5,7-dideuterio-8-nitro-quinoline-2-carboxylate (4.082 mmol, 1.0 equiv.), 1.127 g methyl 5,7-dideuterio-4,6-bis(3-methoxyprop-1-ynyl)-8-nitro-quinoline-2-carboxylate was obtained as pale brown crystals (3.043 mmol, 74%).

$^1\text{H NMR}$  (400 MHz,  $[\text{D}_6]\text{DMSO}$ ):  $\delta$  8.29 (s, 1H, Ar-H), 4.59 (s, 2H, CH<sub>2</sub>), 4.45 (s, 2H, CH<sub>2</sub>), 3.95 (s, 3H, C(O)OCH<sub>3</sub>), 3.44 (s, 3H, OCH<sub>3</sub>), 3.39 (s, 3H, OCH<sub>3</sub>). HRMS (ESI):  $m/z$   $[\text{M}+\text{H}]^+$  calcd for C<sub>19</sub>D<sub>2</sub>H<sub>14</sub>N<sub>2</sub>O<sub>6</sub>: 371.1207; found: 371.1210.



**methyl 3,5,7-trideuterio-4,6-bis(3-methoxyprop-1-ynyl)-8-nitro-quinoline-2-carboxylate (11d)**

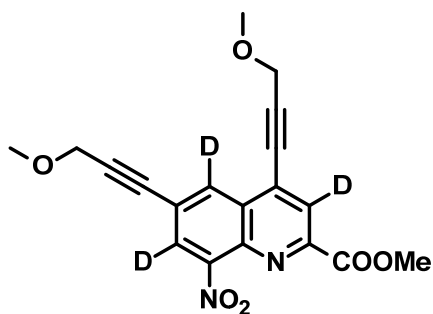

Using **General Procedure 2A** and 900 mg **methyl 4,6-dibromo-3,5,7-trideuterio-8-nitro-quinoline-2-carboxylate** (2.29 mmol, 1.0 equiv.), 402 mg **methyl 3,5,7-trideuterio-4,6-bis(3-methoxyprop-1-ynyl)-8-nitro-quinoline-2-carboxylate** was obtained as pale brown crystals (91% purity, 0.985 mmol, 43%).

$^1\text{H NMR}$  (500 MHz,  $[\text{D}_6]\text{DMSO}$ ):  $\delta$  4.60 (s, 2H,  $\text{CH}_2$ ), 4.45 (s, 2H,  $\text{CH}_2$ ), 3.96 (s, 3H,  $\text{C}(\text{O})\text{OCH}_3$ ), 3.44 (s, 3H,  $\text{OCH}_3$ ), 3.39 (s, 3H,  $\text{OCH}_3$ ). HRMS (ESI):  $m/z$   $[\text{M}+\text{H}]^+$  calcd for  $\text{C}_{19}\text{D}_3\text{H}_{13}\text{N}_2\text{O}_6$ : 372.1269; found: 372.1273.

**methyl 8-nitro-4,6-bis[3-(trideuteriomethoxy)prop-1-ynyl]quinoline-2-carboxylate (11e)**

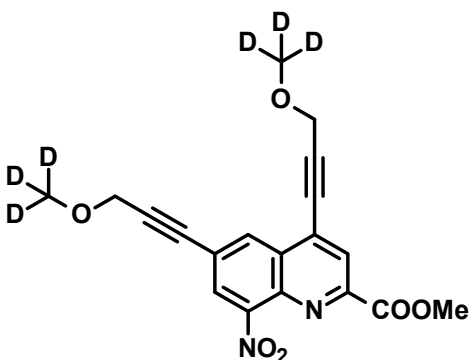

Using **General Procedure 2B** and 4.000 g **methyl 4,6-dibromo-8-nitro-quinoline-2-carboxylate** (10.26 mmol, 1.0 equiv.), and 18.99 g **tert-butyl-diphenyl-[3-(trideuteriomethoxy)prop-1-ynyl]silane** (61.54 mmol, 6.0 equiv.), 2.367 g **methyl 8-nitro-4,6-bis[3-(trideuteriomethoxy)prop-1-ynyl]quinoline-2-carboxylate** was obtained as pale brown crystals (92% purity, 5.816 mmol, 57%).

$^1\text{H NMR}$  (500 MHz,  $[\text{D}_6]\text{DMSO}$ ):  $\delta$  8.58 (d,  $J = 1.8$  Hz, 1H, Ar-H), 8.44 (d,  $J = 1.8$  Hz, 1H, Ar-H), 8.27 (s, 1H, Ar-H), 4.59 (s, 2H,  $\text{CH}_2$ ), 4.44 (s, 2H,  $\text{CH}_2$ ), 3.95 (s, 3H,  $\text{C}(\text{O})\text{OCH}_3$ ). HRMS (ESI):  $m/z$   $[\text{M}+\text{H}]^+$  calcd for  $\text{C}_{19}\text{D}_6\text{H}_{10}\text{N}_2\text{O}_6$ :

375.1458; found: 375.1460.

**methyl 3-deuterio-8-nitro-4,6-bis[3-(trideuteriomethoxy)prop-1-ynyl]quinoline-2-carboxylate (11f)**

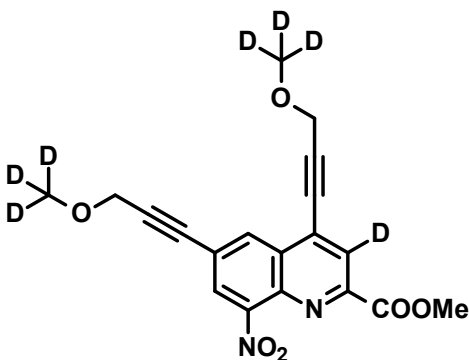

Using **General Procedure 2B** and 2.700 g **methyl 4,6-dibromo-3-deuterio-8-nitro-quinoline-2-carboxylate** (6.906 mmol, 1.0 equiv.) and 12.91 g **tert-butyl-diphenyl-[3-(trideuteriomethoxy)prop-1-ynyl]silane** (41.43 mmol, 6.0 equiv.), 2.866 g **methyl 3-deuterio-8-nitro-4,6-bis[3-(trideuteriomethoxy)prop-1-ynyl]quinoline-2-carboxylate** was obtained as pale brown crystals (81% purity, 6.190 mmol, 90%).

$^1\text{H NMR}$  (400 MHz,  $[\text{D}_6]\text{DMSO}$ ):  $\delta$  8.57 (d,  $J = 1.8$  Hz, 1H, Ar-H), 8.44 (d,  $J = 1.8$  Hz, 1H, Ar-H), 4.59 (s, 2H,  $\text{CH}_2$ ), 4.44 (s, 2H,  $\text{CH}_2$ ), 3.95 (s, 3H,  $\text{C}(\text{O})\text{OCH}_3$ ). HRMS (ESI):  $m/z$   $[\text{M}+\text{H}]^+$  calcd for  $\text{C}_{19}\text{D}_7\text{H}_9\text{N}_2\text{O}_6$ : 376.1520;

found: 376.1521.

**methyl 5,7-dideuterio-8-nitro-4,6-bis[3-(trideuteriomethoxy)prop-1-ynyl]quinoline-2-carboxylate (11g)**

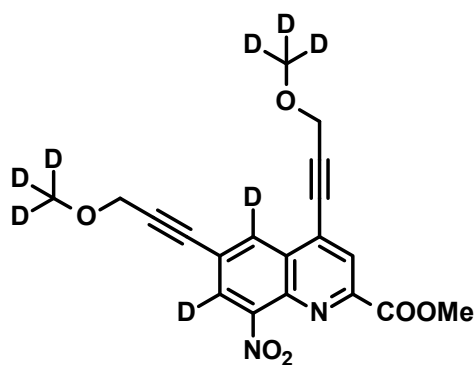

Using **General Procedure 2B** and 2.000 g **methyl 4,6-dibromo-5,7-dideuterio-8-nitro-quinoline-2-carboxylate** (5.102 mmol, 1.0 equiv.) and 9.536 g **tert-butyl-diphenyl-[3-(trideuteriomethoxy)prop-1-ynyl]silane** (30.61 mmol, 6.0 equiv.), 1.628 g **methyl 5,7-dideuterio-8-nitro-4,6-bis[3-(trideuteriomethoxy)prop-1-ynyl]quinoline-2-carboxylate** was obtained as pale brown crystals (89% purity, 3.852 mmol, 75%).

$^1\text{H NMR}$  (400 MHz,  $[\text{D}_6]\text{DMSO}$ ):  $\delta$  8.30 (s, 1H, Ar-H), 4.59 (s, 2H,  $\text{CH}_2$ ), 4.45 (s, 2H,  $\text{CH}_2$ ), 3.95 (s, 3H,  $\text{C}(\text{O})\text{OCH}_3$ ). HRMS (ESI):  $m/z$   $[\text{M}+\text{H}]^+$  calcd for  $\text{C}_{19}\text{D}_8\text{H}_8\text{N}_2\text{O}_6$ : 377.1583; found: 377.1583.

**methyl 3,5,7-trideuterio-8-nitro-4,6-bis[3-(trideuteriomethoxy)prop-1-ynyl]quinoline-2-carboxylate (11h)**

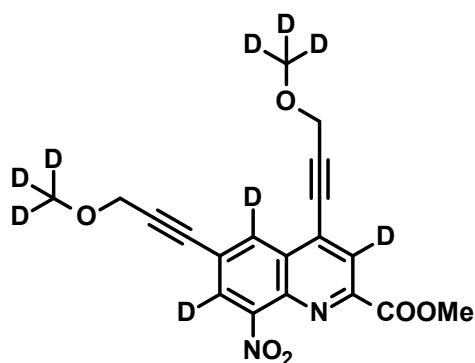

Using **General Procedure 2B** and 3.000 g **methyl 4,6-dibromo-3,5,7-trideuterio-8-nitro-quinoline-2-carboxylate** (7.634 mmol, 1.0 equiv.) and 14.27 g **tert-butyl-diphenyl-[3-(trideuteriomethoxy)prop-1-ynyl]silane** (45.80 mmol, 6.0 equiv.), 2.459 g **methyl 3,5,7-trideuterio-8-nitro-4,6-bis[3-(trideuteriomethoxy)prop-1-ynyl]quinoline-2-carboxylate** was obtained as pale brown crystals (94% purity, 5.228 mmol, 80%).

$^1\text{H NMR}$  (400 MHz,  $[\text{D}_6]\text{DMSO}$ ):  $\delta$  4.59 (s, 2H,  $\text{CH}_2$ ), 4.45 (s, 2H,  $\text{CH}_2$ ), 3.95 (s, 3H,  $\text{C}(\text{O})\text{OCH}_3$ ). HRMS (ESI):  $m/z$   $[\text{M}+\text{H}]^+$  calcd for  $\text{C}_{19}\text{D}_9\text{H}_7\text{N}_2\text{O}_6$ : 378.1646; found: 378.1648.

**methyl 4,6-bis[3,3-dideuterio-3-(trideuteriomethoxy)prop-1-ynyl]-8-nitro-quinoline-2-carboxylate (11i)**

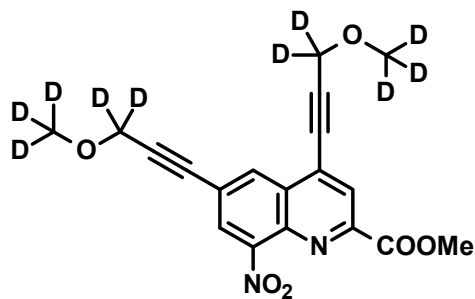

Using **General Procedure 2B** and 250 mg **methyl 4,6-dibromo-8-nitro-quinoline-2-carboxylate** (0.641 mmol, 1.0 equiv.), and 1.206 g **tert-butyl-[3,3-dideuterio-3-(trideuteriomethoxy)prop-1-ynyl]-diphenyl-silane** (3.846 mmol, 6.0 equiv.), 228 mg **methyl 4,6-bis[3,3-dideuterio-3-(trideuteriomethoxy)prop-1-ynyl]-8-nitro-quinoline-2-carboxylate** was obtained as pale brown crystals (96% purity, 0.577 mmol, 90%).

$^1\text{H NMR}$  (500 MHz,  $[\text{D}_6]\text{DMSO}$ ):  $\delta$  8.60 (d,  $J = 1.8$  Hz, 1H, Ar-H), 8.47 (d,  $J = 1.8$  Hz, 1H, Ar-H), 8.30 (s, 1H, Ar-H), 3.95 (s, 3H,  $\text{C}(\text{O})\text{OCH}_3$ ). HRMS (ESI):  $m/z$   $[\text{M}+\text{H}]^+$  calcd for  $\text{C}_{19}\text{D}_{10}\text{H}_6\text{N}_2\text{O}_6$ : 379.1709; found: 379.1711.

**methyl 3-deuterio-4,6-bis[3,3-dideuterio-3-(trideuteriomethoxy)prop-1-ynyl]-8-nitro-quinoline-2-carboxylate (11j)**

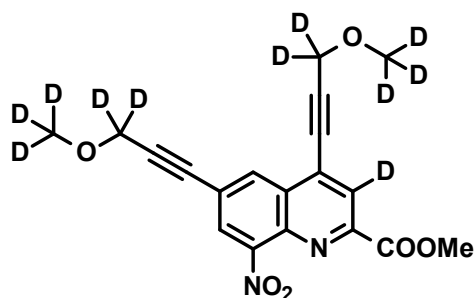

Using **General Procedure 2B** and 250 mg **methyl 4,6-dibromo-3-deuterio-8-nitro-quinoline-2-carboxylate** (0.639 mmol, 1.0 equiv.), and 1.203 g **tert-butyl-[3,3-dideuterio-3-(trideuteriomethoxy)prop-1-ynyl]-diphenyl-silane** (3.836 mmol, 6.0 equiv.), 225 mg **methyl 3-deuterio-4,6-bis[3,3-dideuterio-3-(trideuteriomethoxy)prop-1-ynyl]-8-nitro-quinoline-2-carboxylate** was obtained as pale brown crystals (91% purity, 0.540 mmol, 84%).

$^1\text{H}$  NMR (500 MHz,  $[\text{D}_6]\text{DMSO}$ ):  $\delta$  8.59 (d,  $J = 1.8$  Hz, 1H, Ar-H), 8.48 (d,  $J = 1.8$  Hz, 1H, Ar-H), 3.96 (s, 3H,  $\text{C}(\text{O})\text{OCH}_3$ ). HRMS (ESI):  $m/z$   $[\text{M}+\text{H}]^+$  calcd for  $\text{C}_{19}\text{D}_{11}\text{H}_5\text{N}_2\text{O}_6$ : 380.1772; found: 380.1775.

**methyl 5,7-dideuterio-4,6-bis[3,3-dideuterio-3-(trideuteriomethoxy)prop-1-ynyl]-8-nitro-quinoline-2-carboxylate**

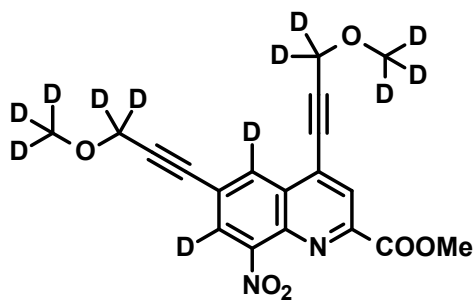

(11k)

Using **General Procedure 2B** and 250 mg **methyl 4,6-dibromo-5,7-dideuterio-8-nitro-quinoline-2-carboxylate** (0.638 mmol, 1.0 equiv.), and 1.200 g **tert-butyl-[3,3-dideuterio-3-(trideuteriomethoxy)prop-1-ynyl]-diphenyl-silane** (3.827 mmol, 6.0 equiv.), 236 mg **methyl 5,7-dideuterio-4,6-bis[3,3-dideuterio-3-(trideuteriomethoxy)prop-1-ynyl]-8-nitro-quinoline-2-carboxylate** was obtained as pale brown crystals (91% purity,

0.5335 mmol, 84%).

$^1\text{H}$  NMR (500 MHz,  $[\text{D}_6]\text{DMSO}$ ): 8.30 (s, 1H), 3.96 (s, 3H,  $\text{C}(\text{O})\text{OCH}_3$ ). HRMS (ESI):  $m/z$   $[\text{M}+\text{H}]^+$  calcd for  $\text{C}_{19}\text{D}_{12}\text{H}_4\text{N}_2\text{O}_6$ : 381.1834; found: 381.1835.

**methyl 3,5,7-trideuterio-4,6-bis[3,3-dideuterio-3-(trideuteriomethoxy)prop-1-ynyl]-8-nitro-quinoline-2-carboxylate (11l)**

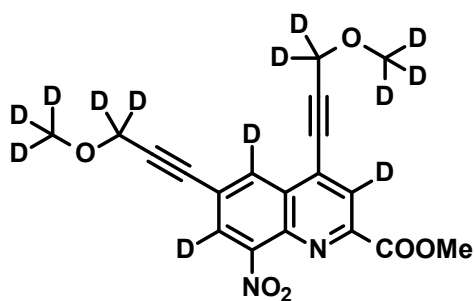

Using **General Procedure 2B** and 250 mg **methyl 4,6-dibromo-3,5,7-trideuterio-8-nitro-quinoline-2-carboxylate** (0.636 mmol, 1.0 equiv.), and 1.197 g **tert-butyl-[3,3-dideuterio-3-(trideuteriomethoxy)prop-1-ynyl]-diphenyl-silane** (3.817 mmol, 6.0 equiv.), 187 mg **methyl 3,5,7-trideuterio-4,6-bis[3,3-dideuterio-3-(trideuteriomethoxy)prop-1-ynyl]-8-nitro-quinoline-2-carboxylate** was obtained as a pale brown crystals (85% purity, 0.417 mmol, 66%).

$^1\text{H}$  NMR (500 MHz,  $[\text{D}_6]\text{DMSO}$ ):  $\delta$  3.96 (s, 3H,  $\text{C}(\text{O})\text{OCH}_3$ ). HRMS (ESI):  $m/z$   $[\text{M}+\text{H}]^+$  calcd for  $\text{C}_{19}\text{D}_{13}\text{H}_3\text{N}_2\text{O}_6$ : 382.1897; found: 382.1900.

### methyl 8-amino-4,6-bis(3-methoxyprop-1-ynyl)quinoline-2-carboxylate (21)

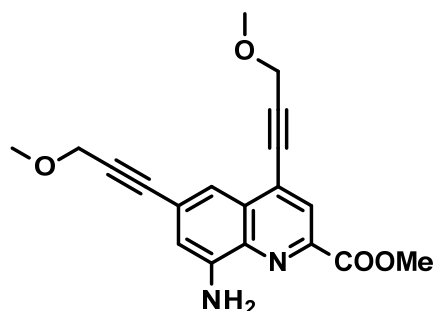

Using **General Procedure 3** and 500 mg **methyl 4,6-bis(3-methoxyprop-1-ynyl)-8-nitro-quinoline-2-carboxylate** (1.36 mmol, 1.0 equiv.), 491 mg **methyl 8-amino-4,6-bis(3-methoxyprop-1-ynyl)quinoline-2-carboxylate** was obtained as a yellow oil (90% purity, 1.31 mmol, 96%).

$^1\text{H NMR}$  (500 MHz,  $[\text{D}_6]\text{DMSO}$ ):  $\delta$  8.07 (s, 1H, Ar-H), 7.34 (d,  $J = 1.7$  Hz, 1H, Ar-H), 6.96 (d,  $J = 1.7$  Hz, 1H, Ar-H), 6.39 (s, 2H,  $\text{NH}_2$ ), 4.54 (s, 2H,  $\text{CH}_2$ ), 4.38 (s, 2H,  $\text{CH}_2$ ), 3.94 (s, 3H,  $\text{C}(\text{O})\text{OCH}_3$ ), 3.41 (s, 3H,  $\text{OCH}_3$ ), 3.36 (s, 3H,  $\text{OCH}_3$ ).

$^{13}\text{C NMR}$  (125 MHz,  $[\text{D}_6]\text{DMSO}$ ):  $\delta$  164.5, 147.2, 143.9, 136.0, 128.7, 128.5, 124.4, 124.2, 113.4, 111.3, 96.9, 87.6, 86.1, 81.1, 59.6, 59.5, 57.3, 57.1, 52.8. HRMS (ESI):  $m/z$   $[\text{M}+\text{H}]^+$  calcd for  $\text{C}_{19}\text{H}_{18}\text{N}_2\text{O}_4$ : 339.1339; found: 339.1340.

### methyl 8-amino-3-deuterio-4,6-bis(3-methoxyprop-1-ynyl)quinoline-2-carboxylate (22)

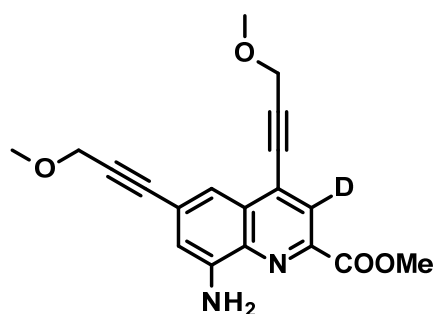

Using **General Procedure 3** and 762 mg **methyl 3-deuterio-4,6-bis(3-methoxyprop-1-ynyl)-8-nitro-quinoline-2-carboxylate** (2.06 mmol, 1.0 equiv.), 652 mg **methyl 8-amino-3-deuterio-4,6-bis(3-methoxyprop-1-ynyl)quinoline-2-carboxylate** was obtained as a yellow oil (91% purity, 1.75 mmol, 85%).

$^1\text{H NMR}$  (400 MHz,  $[\text{D}_6]\text{DMSO}$ ):  $\delta$  7.34 (d,  $J = 1.7$  Hz, 1H, Ar-H), 6.96 (d,  $J = 1.7$  Hz, 1H, Ar-H), 6.38 (s, 2H,  $\text{NH}_2$ ), 4.54 (s, 2H,  $\text{CH}_2$ ), 4.38 (s, 2H,  $\text{CH}_2$ ), 3.94 (s, 3H,  $\text{C}(\text{O})\text{OCH}_3$ ), 3.42 (s, 3H,  $\text{OCH}_3$ ), 3.36 (s, 3H,  $\text{OCH}_3$ ). HRMS (ESI):  $m/z$

$[\text{M}+\text{H}]^+$  calcd for  $\text{C}_{19}\text{DH}_{17}\text{N}_2\text{O}_4$ : 340.1402; found: 340.1402.

### methyl 8-amino-3,5,7-trideuterio-4,6-bis(3-methoxyprop-1-ynyl)quinoline-2-carboxylate (23)

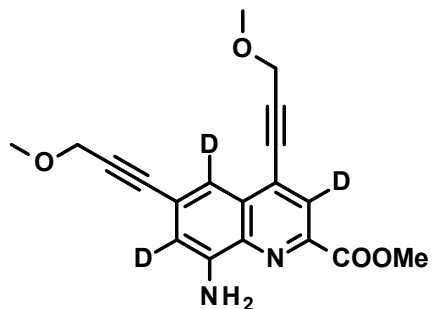

Using **General Procedure 3** and 390 mg **methyl 3,5,7-trideuterio-4,6-bis(3-methoxyprop-1-ynyl)-8-nitro-quinoline-2-carboxylate** (91% purity, 0.9556 mmol, 1.0 equiv.), 466 mg **methyl 8-amino-3,5,7-trideuterio-4,6-bis(3-methoxyprop-1-ynyl)quinoline-2-carboxylate** was obtained as a yellow oil (49% purity, 0.6688 mmol, 70%).

$^1\text{H NMR}$  (500 MHz,  $[\text{D}_6]\text{DMSO}$ ):  $\delta$  6.37 (s, 2H,  $\text{NH}_2$ ), 4.54 (s, 2H,  $\text{CH}_2$ ), 4.38 (s, 2H,  $\text{CH}_2$ ), 3.95 (s, 3H,  $\text{C}(\text{O})\text{OCH}_3$ ), 3.42 (s, 3H,  $\text{OCH}_3$ ), 3.36 (s, 3H,  $\text{OCH}_3$ ).

HRMS (ESI):  $m/z$   $[\text{M}+\text{H}]^+$  calcd for  $\text{C}_{19}\text{D}_3\text{H}_{15}\text{N}_2\text{O}_4$ : 342.1528; found: 342.1526.

**methyl 8-amino-4,6-bis[3-(trideuteriomethoxy)prop-1-ynyl]quinoline-2-carboxylate (24)**

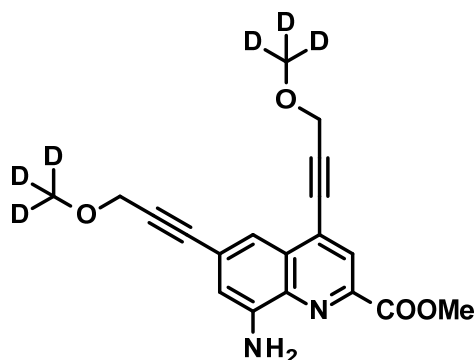

Using **General Procedure 3** and 2.300 g **methyl 8-nitro-4,6-bis[3-(trideuteriomethoxy)prop-1-ynyl]quinoline-2-carboxylate** (92% purity, 5.652 mmol, 1.0 equiv.), 1.562 g **methyl 8-amino-4,6-bis[3-(trideuteriomethoxy)prop-1-ynyl]quinoline-2-carboxylate** was obtained as a yellow oil (93% purity, 4.218 mmol, 75%).

$^1\text{H}$  NMR (400 MHz,  $[\text{D}_6]\text{DMSO}$ ):  $\delta$  8.07 (s, 1H, Ar-H), 7.34 (d,  $J = 1.7$  Hz, 1H, Ar-H), 6.96 (d,  $J = 1.7$  Hz, 1H, Ar-H), 6.39 (s, 2H,  $\text{NH}_2$ ), 4.54 (s, 2H,  $\text{CH}_2$ ), 4.38 (s, 2H,  $\text{CH}_2$ ), 3.94 (s, 3H,  $\text{C}(\text{O})\text{OCH}_3$ ). HRMS (ESI):  $m/z$   $[\text{M}+\text{H}]^+$  calcd for  $\text{C}_{19}\text{D}_6\text{H}_{12}\text{N}_2\text{O}_4$ : 345.1716; found: 345.1719.

**methyl 8-amino-3-deuterio-4,6-bis[3-(trideuteriomethoxy)prop-1-ynyl]quinoline-2-carboxylate (25)**

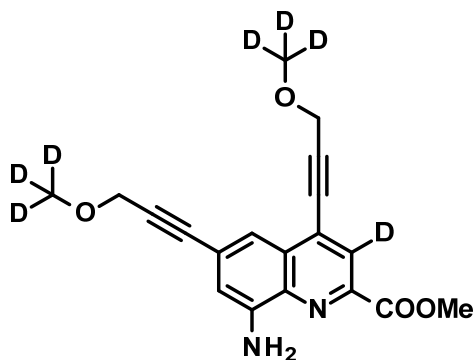

Using **General Procedure 3** and 1.500 g **methyl 3-deuterio-8-nitro-4,6-bis[3-(trideuteriomethoxy)prop-1-ynyl]quinoline-2-carboxylate** (81% purity, 3.237 mmol, 1.0 equiv.), 1.016 g **methyl 8-amino-3-deuterio-4,6-bis[3-(trideuteriomethoxy)prop-1-ynyl]quinoline-2-carboxylate** was obtained as a yellow oil (91% purity, 2.677 mmol, 83%).

$^1\text{H}$  NMR (400 MHz,  $[\text{D}_6]\text{DMSO}$ ):  $\delta$  7.34 (d,  $J = 1.7$  Hz, 1H, Ar-H), 6.96 (d,  $J = 1.7$  Hz, 1H, Ar-H), 6.38 (s, 2H,  $\text{NH}_2$ ), 4.54 (s, 2H,  $\text{CH}_2$ ), 4.38 (s, 2H,  $\text{CH}_2$ ), 3.94 (s, 3H,  $\text{C}(\text{O})\text{OCH}_3$ ). HRMS (ESI):  $m/z$   $[\text{M}+\text{H}]^+$  calcd for  $\text{C}_{19}\text{D}_7\text{H}_{11}\text{N}_2\text{O}_4$ : 346.1779; found: 346.1784.

**methyl 8-amino-5,7-dideuterio-4,6-bis[3-(trideuteriomethoxy)prop-1-ynyl]quinoline-2-carboxylate (26)**

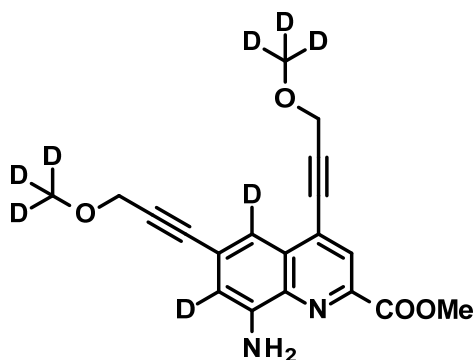

Using **General Procedure 3** and 1.500 g **methyl 5,7-dideuterio-8-nitro-4,6-bis[3-(trideuteriomethoxy)prop-1-ynyl]quinoline-2-carboxylate** (89% purity, 3.547 mmol, 1.0 equiv.), 1.102 g **methyl 8-amino-5,7-dideuterio-4,6-bis[3-(trideuteriomethoxy)prop-1-ynyl]quinoline-2-carboxylate** was obtained as a yellow oil (90% purity, 2.863 mmol, 81%).

$^1\text{H}$  NMR (400 MHz,  $[\text{D}_6]\text{DMSO}$ ):  $\delta$  8.08 (s, 1H, Ar-H), 6.38 (s, 2H,  $\text{NH}_2$ ), 4.54 (s, 2H,  $\text{CH}_2$ ), 4.38 (s, 2H,  $\text{CH}_2$ ), 3.94 (s, 3H,  $\text{C}(\text{O})\text{OCH}_3$ ). HRMS (ESI):  $m/z$   $[\text{M}+\text{H}]^+$  calcd for  $\text{C}_{19}\text{D}_8\text{H}_{10}\text{N}_2\text{O}_4$ : 347.1841; found: 347.1842.

**methyl 8-amino-4,6-bis(3-methoxypropyl)quinoline-2-carboxylate (12a)**

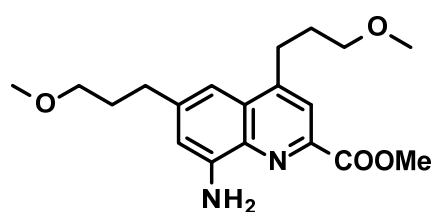

Using **General Procedure 4A** and 609 mg **methyl 4,6-bis(3-methoxyprop-1-ynyl)-8-nitroquinoline-2-carboxylate** (1.65 mmol, 1.0 equiv.), 522 mg **methyl 8-amino-4,6-bis(3-methoxypropyl)quinoline-2-carboxylate** was obtained as a yellow oil (1.51 mmol, 91%).

$^1\text{H}$  NMR (500 MHz,  $[\text{D}_6]\text{DMSO}$ ):  $\delta$  7.86 (s, 1H, Ar-H), 7.04 (d,  $J = 1.6$  Hz, 1H, Ar-H), 6.80 (d,  $J = 1.6$  Hz, 1H, Ar-H), 6.03 (s, 2H,  $\text{NH}_2$ ), 3.92 (s, 3H,  $\text{C}(\text{O})\text{OCH}_3$ ), 3.38 (t,  $J = 6.3$  Hz, 2H,  $\text{CH}_2\text{O}$ ), 3.35 (t,  $J = 6.3$  Hz, 2H,  $\text{CH}_2\text{O}$ ), 3.26 (s, 3H,  $\text{OCH}_3$ ), 3.25 (s, 3H,  $\text{OCH}_3$ ), 3.05 (t,  $J = 7.6$  Hz, 2H,  $\text{CH}_2$ ), 2.69 (t,  $J = 7.6$  Hz, 2H,  $\text{CH}_2$ ) 1.93-1.81 (m, 4H,  $\text{CH}_2$ ).  $^{13}\text{C}$  NMR (125 MHz,  $[\text{D}_6]\text{DMSO}$ ):  $\delta$  165.5, 148.2,

146.5, 144.0, 142.6, 135.6, 128.8, 120.4, 109.9, 108.3, 71.2, 71.1, 57.87, 57.86, 52.4, 32.7, 30.7, 29.2, 28.3. HRMS (ESI):  $m/z$   $[M+H]^+$  calcd for  $C_{19}H_{26}N_2O_4$ : 347.1965; found: 347.1967.

**methyl 8-amino-3-deuterio-4,6-bis(3-methoxypropyl)quinoline-2-carboxylate (12b)**

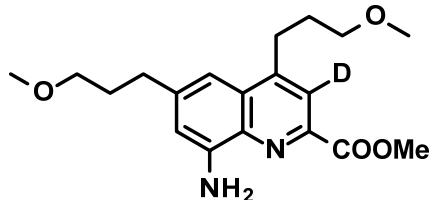

Using **General Procedure 4A** and 1.000 g **methyl 3-deuterio-4,6-bis(3-methoxyprop-1-ynyl)-8-nitro-quinoline-2-carboxylate** (3.472 mmol, 1.0 equiv.), 696 mg **methyl 8-amino-3-deuterio-4,6-bis(3-methoxypropyl)quinoline-2-carboxylate** was obtained as a yellow oil (87% purity, 1.74 mmol, 64%).

$^1H$  NMR (400 MHz,  $[D_6]DMSO$ ):  $\delta$  7.05 (d,  $J = 1.5$  Hz, 1H, Ar-H), 6.80 (d,  $J = 1.5$  Hz, 1H, Ar-H), 6.03 (s, 2H,  $NH_2$ ), 3.92 (s, 3H,  $C(O)OCH_3$ ), 3.39 (t,  $J = 6.3$  Hz, 2H,  $CH_2O$ ), 3.35 (t,  $J = 6.3$  Hz, 2H,  $CH_2O$ ), 3.26 (s, 3H,  $OCH_3$ ), 3.25 (s, 3H,  $OCH_3$ ), 3.09-3.02 (m, 2H,  $CH_2$ ), 2.69 (t,  $J = 7.9$  Hz, 2H,  $CH_2$ ) 1.95-1.81 (m, 4H,  $CH_2$ ). HRMS (ESI):  $m/z$   $[M+H]^+$  calcd for  $C_{19}DH_{25}N_2O_4$ : 348.2028; found: 348.2030.

**methyl 8-amino-5,7-dideuterio-4,6-bis(3-methoxypropyl)quinoline-2-carboxylate (12c)**

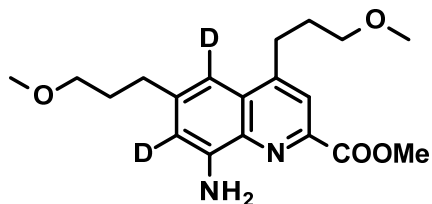

Using **General Procedure 4A** and 500 mg **methyl 5,7-dideuterio-4,6-bis(3-methoxyprop-1-ynyl)-8-nitro-quinoline-2-carboxylate** (1.35 mmol, 1.0 equiv.), 370 mg **methyl 8-amino-5,7-dideuterio-4,6-bis(3-methoxypropyl)quinoline-2-carboxylate** was obtained as a yellow oil (1.06 mmol, 79%).

$^1H$  NMR (400 MHz,  $[D_6]DMSO$ ):  $\delta$  7.85 (s, 1H, Ar-H), 6.03 (s, 2H,  $NH_2$ ), 3.92 (s, 3H,  $C(O)OCH_3$ ), 3.38 (t,  $J = 6.5$  Hz, 2H,  $CH_2O$ ), 3.35 (t,  $J = 6.5$  Hz, 2H,  $CH_2O$ ), 3.26 (s, 3H,  $OCH_3$ ), 3.25 (s, 3H,  $OCH_3$ ), 3.05 (t,  $J = 7.4$  Hz, 2H,  $CH_2$ ), 2.69 (t,  $J = 7.4$  Hz, 2H,  $CH_2$ ) 1.93-1.81 (m, 4H,  $CH_2$ ). HRMS (ESI):  $m/z$   $[M+H]^+$  calcd for  $C_{19}D_2H_{24}N_2O_4$ : 349.2091; found: 349.2095.

**methyl 8-amino-4,6-bis[3-(trideuteriomethoxy)propyl]quinoline-2-carboxylate (12d)**

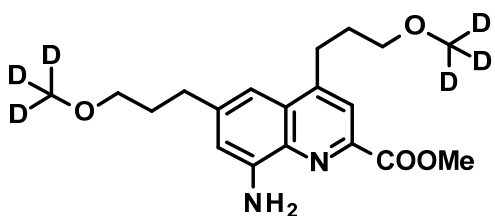

Using **General Procedure 4A** and 700 mg **methyl 8-amino-4,6-bis[3-(trideuteriomethoxy)prop-1-ynyl]quinoline-2-carboxylate** (93% purity, 1.89 mmol, 1.0 equiv.), 654 mg **methyl 8-amino-4,6-bis[3-(trideuteriomethoxy)propyl]quinoline-2-carboxylate** was obtained as a yellow oil (93% purity, 1.73 mmol, 91%).

$^1H$  NMR (400 MHz,  $[D_6]DMSO$ ):  $\delta$  7.86 (s, 1H, Ar-H), 7.04 (d,  $J = 1.6$  Hz, 1H, Ar-H), 6.80 (d,  $J = 1.6$  Hz, 1H, Ar-H), 6.04 (s, 2H,  $NH_2$ ), 3.92 (s, 3H,  $C(O)OCH_3$ ), 3.38 (t,  $J = 6.3$  Hz, 2H,  $CH_2O$ ), 3.35 (t,  $J = 6.3$  Hz, 2H,  $CH_2O$ ), 3.05 (t,  $J = 7.6$  Hz, 2H,  $CH_2$ ), 2.69 (t,  $J = 7.6$  Hz, 2H,  $CH_2$ ) 1.94-1.81 (m, 4H,  $CH_2$ ). HRMS (ESI):  $m/z$   $[M+H]^+$  calcd for  $C_{19}D_6H_{20}N_2O_4$ : 353.2342; found: 353.2346.

**methyl 8-amino-3-deuterio-4,6-bis[3-(trideuteriomethoxy)propyl]quinoline-2-carboxylate (12e)**

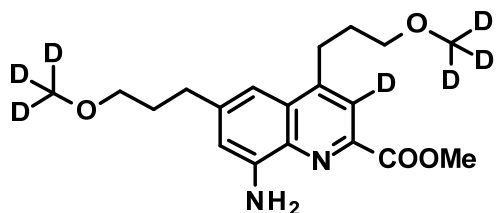

Using **General Procedure 4A** and 600 mg **methyl 8-amino-3-deuterio-4,6-bis[3-(trideuteriomethoxy)prop-1-ynyl]quinoline-2-carboxylate** (91% purity, 1.58 mmol, 1.0 equiv.), 599 mg **methyl 8-amino-3-deuterio-4,6-bis[3-(trideuteriomethoxy)propyl]quinoline-2-carboxylate** was obtained as a yellow oil (87% purity, 1.47 mmol, 93%).

$^1\text{H NMR}$  (400 MHz,  $[\text{D}_6]\text{DMSO}$ ):  $\delta$  7.05 (d,  $J = 1.6$  Hz, 1H, Ar-H), 6.80 (d,  $J = 1.6$  Hz, 1H, Ar-H), 6.03 (s, 2H,  $\text{NH}_2$ ), 3.92 (s, 3H,  $\text{C}(\text{O})\text{OCH}_3$ ), 3.38 (t,  $J = 6.3$  Hz, 2H,  $\text{CH}_2\text{O}$ ), 3.35 (t,  $J = 6.3$  Hz, 2H,  $\text{CH}_2\text{O}$ ), 3.05 (t,  $J = 7.6$  Hz, 2H,  $\text{CH}_2$ ), 2.69 (t,  $J = 7.6$  Hz, 2H,  $\text{CH}_2$ ) 1.95-1.81 (m, 4H,  $\text{CH}_2$ ). HRMS (ESI):  $m/z$   $[\text{M}+\text{H}]^+$  calcd for  $\text{C}_{19}\text{D}_7\text{H}_{19}\text{N}_2\text{O}_4$ : 354.2405; found: 354.2406.

**methyl 8-amino-5,7-dideuterio-4,6-bis[3-(trideuteriomethoxy)propyl]quinoline-2-carboxylate (12f)**

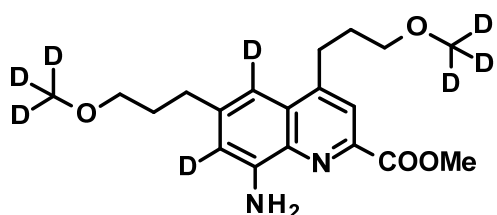

Using **General Procedure 4A** and 650 mg **methyl 8-amino-5,7-dideuterio-4,6-bis[3-(trideuteriomethoxy)prop-1-ynyl]quinoline-2-carboxylate** (90% purity, 1.689 mmol, 1.0 equiv.), 636 mg **methyl 8-amino-5,7-dideuterio-4,6-bis[3-(trideuteriomethoxy)propyl]quinoline-2-carboxylate** was obtained as a yellow oil (84% purity, 1.51 mmol, 89%).

$^1\text{H NMR}$  (400 MHz,  $[\text{D}_6]\text{DMSO}$ ):  $\delta$  7.85 (s, 1H, Ar-H), 6.02 (s, 2H,  $\text{NH}_2$ ), 3.92 (s, 3H,  $\text{C}(\text{O})\text{OCH}_3$ ), 3.38 (t,  $J = 6.3$  Hz, 2H,  $\text{CH}_2\text{O}$ ), 3.35 (t,  $J = 6.3$  Hz, 2H,  $\text{CH}_2\text{O}$ ), 3.05 (t,  $J = 7.5$  Hz, 2H,  $\text{CH}_2$ ), 2.69 (t,  $J = 7.5$  Hz, 2H,  $\text{CH}_2$ ) 1.94-1.81 (m, 4H,  $\text{CH}_2$ ). HRMS (ESI):  $m/z$   $[\text{M}+\text{H}]^+$  calcd for  $\text{C}_{19}\text{D}_8\text{H}_{18}\text{N}_2\text{O}_4$ : 355.2467; found: 355.2470.

**methyl 8-amino-4,6-bis(1,1,2,2-tetradeuterio-3-methoxy-propyl)quinoline-2-carboxylate (27)**

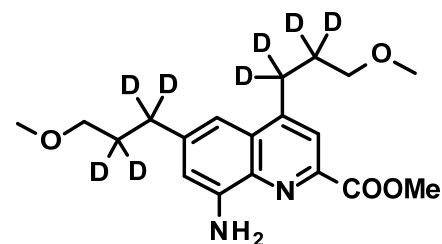

Using **General Procedure 4B** and 600 mg **methyl 8-amino-4,6-bis(3-methoxyprop-1-ynyl)quinoline-2-carboxylate** (88% purity, 1.56 mmol, 1.0 equiv.), 323 mg **methyl 8-amino-4,6-bis(1,1,2,2-tetradeuterio-3-methoxy-propyl)quinoline-2-carboxylate** was obtained as a yellow oil (87% purity, 0.793 mmol, 51%).

$^1\text{H NMR}$  (400 MHz,  $[\text{D}_6]\text{DMSO}$ ):  $\delta$  7.86 (s, 1H, Ar-H), 7.04 (s, 1H, Ar-H), 6.80 (s, 1H, Ar-H), 6.02 (s, 2H,  $\text{NH}_2$ ), 3.92 (s, 3H,  $\text{C}(\text{O})\text{OCH}_3$ ), 3.37 (s, 2H,  $\text{CH}_2\text{O}$ ), 3.33 (s, 2H,  $\text{CH}_2\text{O}$ ), 3.25 (s, 3H,  $\text{OCH}_3$ ), 3.24 (s, 3H,  $\text{OCH}_3$ ). HRMS (ESI):  $m/z$   $[\text{M}+\text{H}]^+$  calcd for  $\text{C}_{19}\text{D}_8\text{H}_{18}\text{N}_2\text{O}_4$ : 355.2467; found: 355.2469.

**methyl 8-amino-3-deuterio-4,6-bis(1,1,2,2-tetradeuterio-3-methoxy-propyl)quinoline-2-carboxylate (28)**

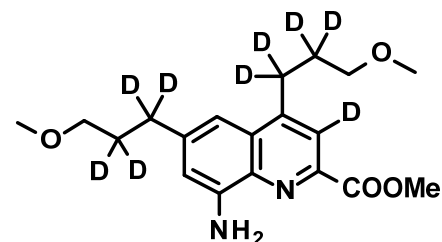

Using **General Procedure 4B** and 490 mg **methyl 8-amino-3-deuterio-4,6-bis(3-methoxyprop-1-ynyl)quinoline-2-carboxylate** (91% purity, 1.31 mmol, 1.0 equiv.), 450 mg **methyl 8-amino-3-deuterio-4,6-bis(1,1,2,2-tetradeuterio-3-methoxy-propyl)quinoline-2-carboxylate** was obtained as a yellow oil (91% purity, 1.15 mmol, 88%).

$^1\text{H NMR}$  (400 MHz,  $[\text{D}_6]\text{DMSO}$ ): 7.05 (d,  $J = 1.6$  Hz, 1H, Ar-H), 6.80 (d,  $J = 1.6$  Hz, 1H, Ar-H), 6.01 (s, 2H,  $\text{NH}_2$ ), 3.92 (s, 3H,  $\text{C}(\text{O})\text{OCH}_3$ ), 3.37 (s, 2H,  $\text{CH}_2\text{O}$ ), 3.34 (s, 2H,  $\text{CH}_2\text{O}$ ), 3.25 (s, 3H,  $\text{OCH}_3$ ), 3.24 (s, 3H,  $\text{OCH}_3$ ). HRMS (ESI):  $m/z$   $[\text{M}+\text{H}]^+$  calcd for  $\text{C}_{19}\text{D}_9\text{H}_{17}\text{N}_2\text{O}_4$ : 356.2530; found: 356.2530.

**methyl 8-amino-5,7-dideuterio-4,6-bis(1,1,2,2-tetradeuterio-3-methoxy-propyl)quinoline-2-carboxylate (12g)**

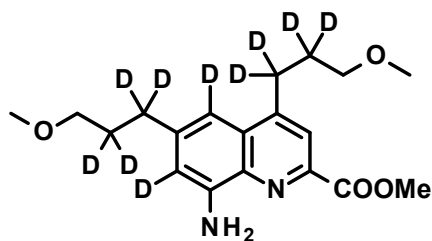

Using **General Procedure 4B** and 400 mg **methyl 5,7-dideuterio-4,6-bis(3-methoxyprop-1-ynyl)-8-nitro-quinoline-2-carboxylate** (1.08 mmol, 1.0 equiv.), 321 mg **methyl 8-amino-5,7-dideuterio-4,6-bis(1,1,2,2-tetradeuterio-3-methoxy-propyl)quinoline-2-carboxylate** was obtained as a yellow oil (94% purity, 0.821 mmol, 76%).

$^1\text{H}$  NMR (400 MHz,  $[\text{D}_6]\text{DMSO}$ ):  $\delta$  7.86 (s, 1H, Ar-H), 6.02 (s, 2H,  $\text{NH}_2$ ), 3.92 (s, 3H,  $\text{C}(\text{O})\text{OCH}_3$ ), 3.37 (s, 2H,  $\text{CH}_2\text{O}$ ), 3.34 (s, 2H,  $\text{CH}_2\text{O}$ ), 3.25 (s, 3H,  $\text{OCH}_3$ ), 3.24 (s, 3H,  $\text{OCH}_3$ ). HRMS (ESI):  $m/z$   $[\text{M}+\text{H}]^+$  calcd for  $\text{C}_{19}\text{D}_{10}\text{H}_{16}\text{N}_2\text{O}_4$ : 357.2593; found: 357.2599.

**methyl 8-amino-4,6-bis[1,1,2,2-tetradeuterio-3-(trideuteriomethoxy)propyl]quinoline-2-carboxylate (12h)**

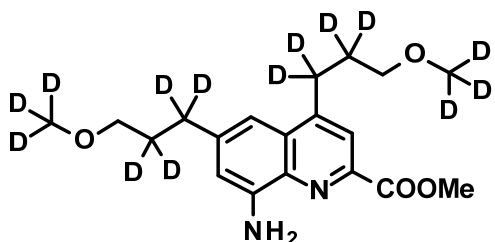

Using **General Procedure 4B** and 406 mg **methyl 8-amino-4,6-bis[3-(trideuteriomethoxy)prop-1-ynyl]quinoline-2-carboxylate** (93% purity, 1.10 mmol, 1.0 equiv.), 401 mg **methyl 8-amino-4,6-bis[1,1,2,2-tetradeuterio-3-(trideuteriomethoxy)propyl]quinoline-2-carboxylate** was obtained as a yellow oil (88% purity, 0.979 mmol, 89%).

$^1\text{H}$  NMR (500 MHz,  $[\text{D}_6]\text{DMSO}$ ):  $\delta$  7.86 (s, 1H, Ar-H), 7.04 (d,  $J = 1.5$  Hz, 1H, Ar-H), 6.80 (d,  $J = 1.5$  Hz, 1H, Ar-H), 6.03 (s, 2H,  $\text{NH}_2$ ), 3.92 (s, 3H,  $\text{C}(\text{O})\text{OCH}_3$ ), 3.37 (s, 2H,  $\text{CH}_2\text{O}$ ), 3.33 (s, 2H,  $\text{CH}_2\text{O}$ ). HRMS (ESI):  $m/z$   $[\text{M}+\text{H}]^+$  calcd for  $\text{C}_{19}\text{D}_{14}\text{H}_{12}\text{N}_2\text{O}_4$ : 361.2844; found: 361.2845.

**methyl 8-amino-3-deuterio-4,6-bis[1,1,2,2-tetradeuterio-3-(trideuteriomethoxy)propyl]quinoline-2-carboxylate (12i)**

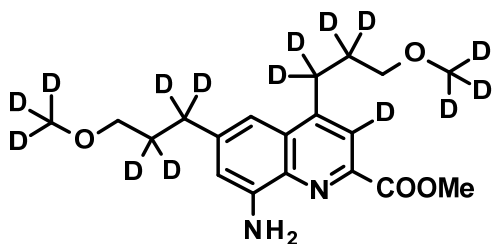

Using **General Procedure 4B** and 490 mg **methyl 8-amino-3-deuterio-4,6-bis[3-(trideuteriomethoxy)prop-1-ynyl]quinoline-2-carboxylate** (81% purity, 1.14 mmol, 1.0 equiv.), 472 mg **methyl 8-amino-3-deuterio-4,6-bis[1,1,2,2-tetradeuterio-3-(trideuteriomethoxy)propyl]quinoline-2-carboxylate** was obtained as a yellow oil (80% purity, 1.05 mmol, 92%).

$^1\text{H}$  NMR (400 MHz,  $[\text{D}_6]\text{DMSO}$ ):  $\delta$  7.04 (d,  $J = 1.4$  Hz, 1H, Ar-H), 6.80 (d,  $J = 1.4$  Hz, 1H, Ar-H), 6.03 (s, 2H,  $\text{NH}_2$ ), 3.92 (s, 3H,  $\text{C}(\text{O})\text{OCH}_3$ ), 3.37 (s, 2H,  $\text{CH}_2\text{O}$ ), 3.34 (s, 2H,  $\text{CH}_2\text{O}$ ). HRMS (ESI):  $m/z$   $[\text{M}+\text{H}]^+$  calcd for  $\text{C}_{19}\text{D}_{15}\text{H}_{11}\text{N}_2\text{O}_4$ : 362.2907; found: 362.2911.

**methyl 8-amino-5,7-dideuterio-4,6-bis[1,1,2,2-tetradeuterio-3-(trideuteriomethoxy)propyl]quinoline-2-carboxylate (12j)**

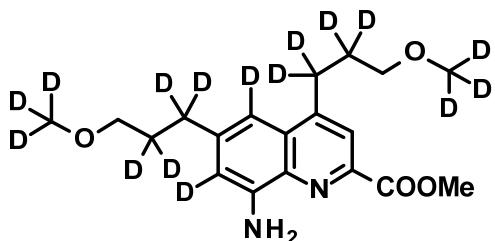

Using **General Procedure 4B** and 160 mg **methyl 8-amino-5,7-dideuterio-4,6-bis[3-(trideuteriomethoxy)prop-1-ynyl]quinoline-2-carboxylate** (90% purity, 0.416 mmol, 1.0 equiv.), 158 mg **methyl 8-amino-5,7-dideuterio-4,6-bis[1,1,2,2-tetradeuterio-3-(trideuteriomethoxy)propyl]quinoline-2-carboxylate** was obtained as a yellow oil (88% purity, 0.384 mmol, 92%).

$^1\text{H}$  NMR (500 MHz,  $[\text{D}_6]\text{DMSO}$ ):  $\delta$  7.86 (s, 1H, Ar-H), 6.02 (s, 2H,  $\text{NH}_2$ ), 3.92 (s, 3H,  $\text{C}(\text{O})\text{OCH}_3$ ), 3.37 (s, 2H,  $\text{CH}_2\text{O}$ ), 3.34 (s, 2H,  $\text{CH}_2\text{O}$ ). HRMS (ESI):  $m/z$   $[\text{M}+\text{H}]^+$  calcd for  $\text{C}_{19}\text{D}_{16}\text{H}_{10}\text{N}_2\text{O}_4$ : 363.2970; found: 363.2969.



**methyl 8-amino-3,5,7-trideuterio-4,6-bis[1,1,2,2-tetradeuterio-3-(trideuteriomethoxy)propyl]quinoline-2-carboxylate (12k)**

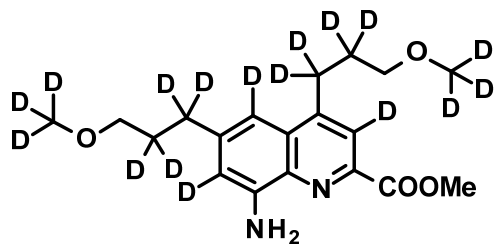

Using **General Procedure 4B** and 532 mg **methyl 3,5,7-trideuterio-8-nitro-4,6-bis[3-(trideuteriomethoxy)prop-1-ynyl]quinoline-2-carboxylate** (94% purity, 1.33 mmol, 1.0 equiv.), 421 mg **methyl 8-amino-3,5,7-trideuterio-4,6-bis[1,1,2,2-tetradeuterio-3-(trideuteriomethoxy)propyl]quinoline-2-carboxylate** was obtained as a yellow oil (93% purity, 1.08 mmol, 81%).

$^1\text{H NMR}$  (400 MHz,  $[\text{D}_6]\text{DMSO}$ ):  $\delta$  6.02 (s, 2H,  $\text{NH}_2$ ), 3.92 (s, 3H,  $\text{C}(\text{O})\text{OCH}_3$ ), 3.37 (s, 2H,  $\text{CH}_2\text{O}$ ), 3.34 (s, 2H,  $\text{CH}_2\text{O}$ ).  $\text{HRMS}$  (ESI):  $m/z$   $[\text{M}+\text{H}]^+$  calcd for  $\text{C}_{19}\text{D}_{17}\text{H}_9\text{N}_2\text{O}_4$ : 364.3032; found: 364.3035.

**methyl 8-amino-4,6-bis[1,1,2,2,3,3-hexadeuterio-3-(trideuteriomethoxy)propyl]quinoline-2-carboxylate (12l)**

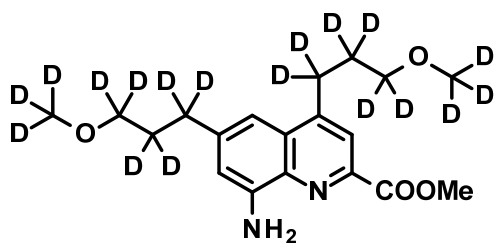

Using **General Procedure 4B** and 210 mg **methyl 4,6-bis[3,3-dideuterio-3-(trideuteriomethoxy)prop-1-ynyl]-8-nitro-quinoline-2-carboxylate** (96% purity, 0.534 mmol, 1.0 equiv.), 321 mg **methyl 8-amino-4,6-bis[1,1,2,2,3,3-hexadeuterio-3-(trideuteriomethoxy)propyl]quinoline-2-carboxylate** was obtained as a yellow oil (55% purity, 0.484 mmol, 91%).

$^1\text{H NMR}$  (500 MHz,  $[\text{D}_6]\text{DMSO}$ ):  $\delta$  7.86 (s, 1H, Ar-H), 7.04 (d,  $J = 1.7$  Hz, 1H, Ar-H), 6.80 (d,  $J = 1.7$  Hz, 1H, Ar-H), 6.03 (s, 2H,  $\text{NH}_2$ ), 3.92 (s, 3H,  $\text{C}(\text{O})\text{OCH}_3$ ).  $\text{HRMS}$  (ESI):  $m/z$   $[\text{M}+\text{H}]^+$  calcd for  $\text{C}_{19}\text{D}_{18}\text{H}_8\text{N}_2\text{O}_4$ : 365.3095; found: 365.3096.

**methyl 8-amino-3-deuterio-4,6-bis[1,1,2,2,3,3-hexadeuterio-3-(trideuteriomethoxy)propyl]quinoline-2-carboxylate (12m)**

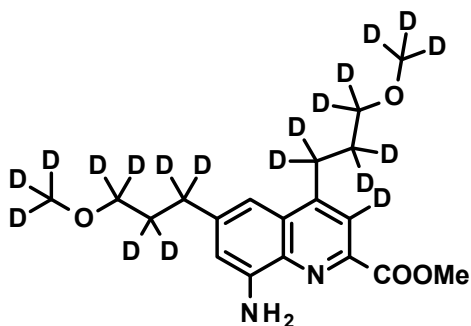

Using **General Procedure 4B** and 225 mg **methyl 3-deuterio-4,6-bis[3,3-dideuterio-3-(trideuteriomethoxy)prop-1-ynyl]-8-nitro-quinoline-2-carboxylate** (91% purity, 0.540 mmol, 1.0 equiv.), 301 mg **methyl 8-amino-3-deuterio-4,6-bis[1,1,2,2,3,3-hexadeuterio-3-(trideuteriomethoxy)propyl]quinoline-2-carboxylate** was obtained as a yellow oil (52% purity, 0.428 mmol, 79%).

$^1\text{H NMR}$  (500 MHz,  $[\text{D}_6]\text{DMSO}$ ):  $\delta$  7.04 (d,  $J = 1.7$  Hz, 1H, Ar-H), 6.80 (d,  $J = 1.7$  Hz, 1H, Ar-H), 6.03 (s, 2H,  $\text{NH}_2$ ), 3.92 (s, 3H,  $\text{C}(\text{O})\text{OCH}_3$ ).  $\text{HRMS}$  (ESI):  $m/z$   $[\text{M}+\text{H}]^+$  calcd for  $\text{C}_{19}\text{D}_{19}\text{H}_7\text{N}_2\text{O}_4$ : 366.3158; found: 366.3158.

**methyl 8-amino-5,7-dideuterio-4,6-bis[1,1,2,2,3,3-hexadeuterio-3-(trideuteriomethoxy)propyl]quinoline-2-carboxylate (12n)**

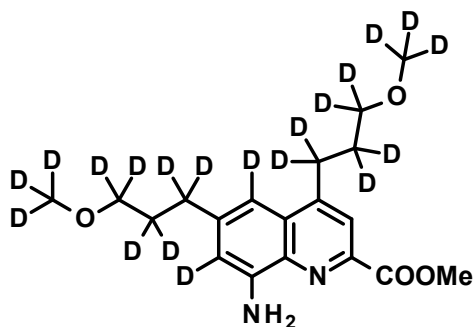

367.3221; found: 367.3222.

Using **General Procedure 4B** and 212 mg **methyl 5,7-dideuterio-4,6-bis[3,3-dideuterio-3-(trideuteriomethoxy)prop-1-ynyl]-8-nitroquinoline-2-carboxylate** (91% purity, 0.509 mmol, 1.0 equiv.), 300 mg **methyl 8-amino-5,7-dideuterio-4,6-bis[1,1,2,2,3,3-hexadeuterio-3-(trideuteriomethoxy)propyl]quinoline-2-carboxylate** was obtained as a yellow oil (70% purity, 0.438 mmol, 86%).

$^1\text{H NMR}$  (500 MHz,  $[\text{D}_6]\text{DMSO}$ ):  $\delta$  7.86 (s, 1H, Ar-H), 6.02 (s, 2H,  $\text{NH}_2$ ), 3.92 (s, 3H,  $\text{C}(\text{O})\text{OCH}_3$ ). HRMS (ESI):  $m/z$   $[\text{M}+\text{H}]^+$  calcd for  $\text{C}_{19}\text{D}_{20}\text{H}_6\text{N}_2\text{O}_4$ :

**methyl 8-amino-3,5,7-trideuterio-4,6-bis[1,1,2,2,3,3-hexadeuterio-3-(trideuteriomethoxy)propyl]quinoline-2-carboxylate (12o)**

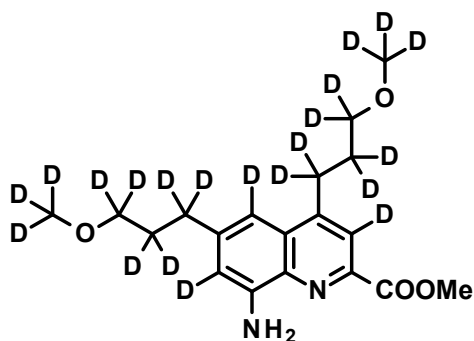

368.3284.

Using **General Procedure 4B** and 180 mg **methyl 3,5,7-trideuterio-4,6-bis[3,3-dideuterio-3-(trideuteriomethoxy)prop-1-ynyl]-8-nitroquinoline-2-carboxylate** (85% purity, 0.401 mmol, 1.0 equiv.), 230 mg **methyl 8-amino-3,5,7-trideuterio-4,6-bis[1,1,2,2,3,3-hexadeuterio-3-(trideuteriomethoxy)propyl]quinoline-2-carboxylate** was obtained as a yellow oil (61% purity, 0.382 mmol, 95%).

$^1\text{H NMR}$  (500 MHz,  $[\text{D}_6]\text{DMSO}$ ):  $\delta$  6.02 (s, 2H,  $\text{NH}_2$ ), 3.92 (s, 3H,  $\text{C}(\text{O})\text{OCH}_3$ ). HRMS (ESI):  $m/z$   $[\text{M}+\text{H}]^+$  calcd for  $\text{C}_{19}\text{D}_{21}\text{H}_5\text{N}_2\text{O}_4$ : 368.3283; found:

**methyl 8-acetamido-4,6-bis(3-methoxypropyl)quinoline-2-carboxylate (13a)**

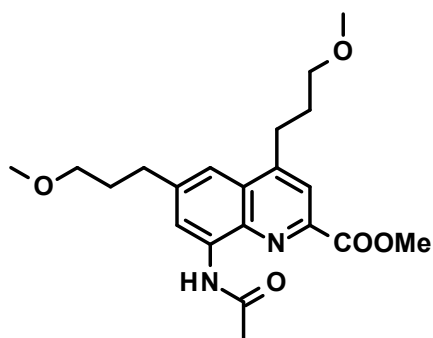

2.28 (s, 3H,  $\text{C}(\text{O})\text{CH}_3$ ), 1.97-1.85 (m, 4H,  $\text{CH}_2$ ).  $^{13}\text{C NMR}$  (125 MHz,  $[\text{D}_6]\text{DMSO}$ ):  $\delta$  168.6, 165.1, 149.7, 144.5, 143.3, 136.2, 135.5, 128.0, 121.0, 118.0, 116.0, 70.97, 70.95, 57.89, 57.88, 52.7, 32.8, 30.7, 29.4, 28.1, 24.8. HRMS (ESI):  $m/z$   $[\text{M}+\text{H}]^+$  calcd for  $\text{C}_{21}\text{H}_{28}\text{N}_2\text{O}_5$ : 389.2071; found: 389.2070.

Using **General Procedure 5A** and 696 mg **methyl 8-amino-4,6-bis(3-methoxypropyl)quinoline-2-carboxylate** (2.01 mmol, 1.0 equiv.), 758 mg **methyl 8-acetamido-4,6-bis(3-methoxypropyl)quinoline-2-carboxylate** was obtained as a yellow oil (1.91 mmol, 95%).

$^1\text{H NMR}$  (500 MHz,  $[\text{D}_6]\text{DMSO}$ ):  $\delta$  9.85 (s, 1H, NH), 8.55 (d,  $J = 1.5$  Hz, 1H, Ar-H), 7.98 (s, 1H, Ar-H), 7.64 (d,  $J = 1.5$  Hz, 1H, Ar-H), 3.97 (s, 3H,  $\text{C}(\text{O})\text{OCH}_3$ ), 3.39 (t,  $J = 6.2$  Hz, 2H,  $\text{CH}_2$ ), 3.37 (t,  $J = 6.2$  Hz, 2H,  $\text{CH}_2$ ), 3.26 (s, 3H,  $\text{OCH}_3$ ), 3.25 (s, 3H,  $\text{OCH}_3$ ), 3.15 (t,  $J = 7.7$  Hz, 2H,  $\text{CH}_2$ ), 2.83 (t,  $J = 7.7$  Hz, 2H,  $\text{CH}_2$ ),

### methyl 8-acetamido-3-deuterio-4,6-bis(3-methoxypropyl)quinoline-2-carboxylate (13b)

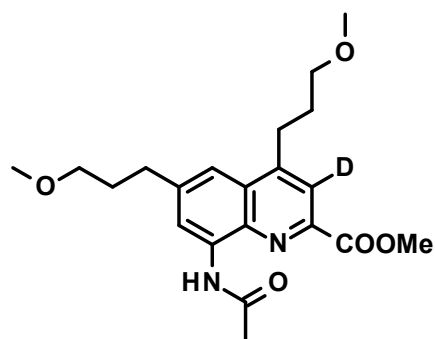

Using **General Procedure 5A** and 690 mg **methyl 8-amino-3-deuterio-4,6-bis(3-methoxypropyl)quinoline-2-carboxylate** (87% purity, 1.73 mmol, 1.0 equiv.), 567 mg **methyl 8-acetamido-3-deuterio-4,6-bis(3-methoxypropyl)quinoline-2-carboxylate** was obtained as a yellow oil (1.46 mmol, 84%).

$^1\text{H NMR}$  (400 MHz,  $[\text{D}_6]\text{DMSO}$ ):  $\delta$  9.87 (s, 1H, NH), 8.56 (d,  $J = 1.4$  Hz, 1H, Ar-H), 7.64 (d,  $J = 1.4$  Hz, 1H, Ar-H), 3.97 (s, 3H, C(O)OCH<sub>3</sub>), 3.39 (t,  $J = 6.3$  Hz, 2H, CH<sub>2</sub>), 3.37 (t,  $J = 6.3$  Hz, 2H, CH<sub>2</sub>), 3.26 (s, 3H, OCH<sub>3</sub>), 3.25 (s, 3H, OCH<sub>3</sub>),

3.16 (t,  $J = 7.4$  Hz, 2H, CH<sub>2</sub>), 2.83 (t,  $J = 7.4$  Hz, 2H, CH<sub>2</sub>), 2.28 (s, 3H, C(O)CH<sub>3</sub>), 1.97-1.85 (m, 4H, CH<sub>2</sub>). HRMS (ESI):  $m/z$   $[\text{M}+\text{H}]^+$  calcd for C<sub>21</sub>DH<sub>27</sub>N<sub>2</sub>O<sub>5</sub>: 390.2134; found: 390.2135.

### methyl 8-acetamido-5,7-dideuterio-4,6-bis(3-methoxypropyl)quinoline-2-carboxylate (13c)

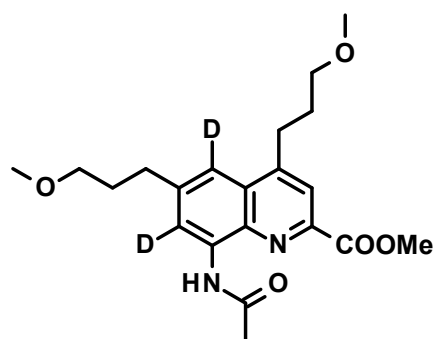

Using **General Procedure 5A** and 180 mg **methyl 8-amino-5,7-dideuterio-4,6-bis(3-methoxypropyl)quinoline-2-carboxylate** (0.517 mmol, 1.0 equiv.), 176 mg **methyl 8-acetamido-5,7-dideuterio-4,6-bis(3-methoxypropyl)quinoline-2-carboxylate** was obtained as a yellow oil (0.451 mmol, 87%).

$^1\text{H NMR}$  (400 MHz,  $[\text{D}_6]\text{DMSO}$ ):  $\delta$  9.85 (s, 1H, NH), 7.98 (s, 1H, Ar-H), 3.97 (s, 3H, C(O)OCH<sub>3</sub>), 3.39 (t,  $J = 6.1$  Hz, 2H, CH<sub>2</sub>), 3.37 (t,  $J = 6.1$  Hz, 2H, CH<sub>2</sub>), 3.26 (s, 3H, OCH<sub>3</sub>), 3.25 (s, 3H, OCH<sub>3</sub>), 3.15 (t,  $J = 7.7$  Hz, 2H, CH<sub>2</sub>), 2.83 (t,  $J = 7.7$  Hz, 2H, CH<sub>2</sub>), 2.28 (s, 3H, C(O)CH<sub>3</sub>), 1.97-1.85 (m, 4H, CH<sub>2</sub>). HRMS (ESI):  $m/z$   $[\text{M}+\text{H}]^+$  calcd for C<sub>21</sub>D<sub>2</sub>H<sub>26</sub>N<sub>2</sub>O<sub>5</sub>:

391.2197; found: 3891.2200.

### methyl 8-acetamido-3,5,7-trideuterio-4,6-bis(3-methoxyprop-1-ynyl)quinoline-2-carboxylate (29)

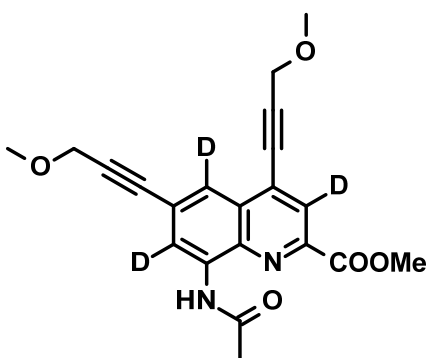

Using **General Procedure 5A** and 380 mg **methyl 8-amino-3,5,7-trideuterio-4,6-bis(3-methoxyprop-1-ynyl)quinoline-2-carboxylate** (49% purity, 0.545 mmol, 1.0 equiv.), 415 mg **methyl 8-acetamido-3,5,7-trideuterio-4,6-bis(3-methoxyprop-1-ynyl)quinoline-2-carboxylate** was obtained as a yellow oil (41% purity, 0.444 mmol, 81%).

$^1\text{H NMR}$  (500 MHz,  $[\text{D}_6]\text{DMSO}$ ):  $\delta$  9.91 (s, 1H, NH), 4.58 (s, 2H, CH<sub>2</sub>), 4.43 (s, 2H, CH<sub>2</sub>), 3.99 (s, 3H, C(O)OCH<sub>3</sub>), 3.43 (s, 3H, OCH<sub>3</sub>), 3.38 (s, 3H, OCH<sub>3</sub>), 2.31 (s, 3H, C(O)CH<sub>3</sub>).  $^{13}\text{C NMR}$  (125 MHz,  $[\text{D}_6]\text{DMSO}$ ):  $\delta$  169.2, 164.2, 146.1, 137.0, 136.0, 129.6, 127.9, 123.4, 98.4, 89.2, 85.3, 80.4, 59.6, 59.5, 57.4, 57.2, 53.1,

24.7. HRMS (ESI):  $m/z$   $[\text{M}+\text{H}]^+$  calcd for C<sub>21</sub>D<sub>3</sub>H<sub>17</sub>N<sub>2</sub>O<sub>5</sub>: 384.1633; found: 384.1637.

**methyl 4,6-bis(3-methoxyprop-1-ynyl)-8-[(2,2,2-trideuterioacetyl)amino]quinoline-2-carboxylate (30)**

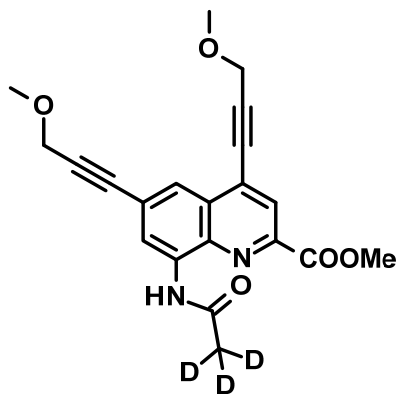

Using **General Procedure 5B** and 280 mg **methyl 8-amino-4,6-bis(3-methoxyprop-1-ynyl)quinoline-2-carboxylate** (94% purity, 0.778 mmol, 1.0 equiv.), 270 mg **methyl 4,6-bis(3-methoxyprop-1-ynyl)-8-[(2,2,2-trideuterioacetyl)amino]quinoline-2-carboxylate** (86% purity, 0.606 mmol, 78%) as a yellow solid.

$^1\text{H NMR}$  (500 MHz,  $[\text{D}_6]\text{DMSO}$ ):  $\delta$  9.87 (s, 1H, NH), 8.66 (d,  $J = 1.7$  Hz, 1H, Ar-H), 8.18 (s, 1H, Ar-H), 7.89 (d,  $J = 1.7$  Hz, 1H, Ar-H), 4.57 (s, 2H,  $\text{CH}_2$ ), 4.43 (s, 2H,  $\text{CH}_2$ ), 3.99 (s, 3H,  $\text{C}(\text{O})\text{OCH}_3$ ), 3.43 (s, 3H,  $\text{OCH}_3$ ), 3.38 (s, 3H,  $\text{OCH}_3$ ).  $^{13}\text{C NMR}$  (125 MHz,  $[\text{D}_6]\text{DMSO}$ ):  $\delta$  169.3, 164.2, 146.1, 136.9, 136.1, 129.7, 127.9, 124.6, 123.6, 121.6, 119.5, 98.4, 89.2, 85.4, 80.5, 59.6, 59.5, 57.4, 57.2, 53.1. HRMS

(ESI):  $m/z$   $[\text{M}+\text{H}]^+$  calcd for  $\text{C}_{21}\text{D}_3\text{H}_{17}\text{N}_2\text{O}_5$ : 384.1633; found: 384.1634.

**methyl 4,6-bis(3-methoxypropyl)-8-[(2,2,2-trideuterioacetyl)amino]quinoline-2-carboxylate (31)**

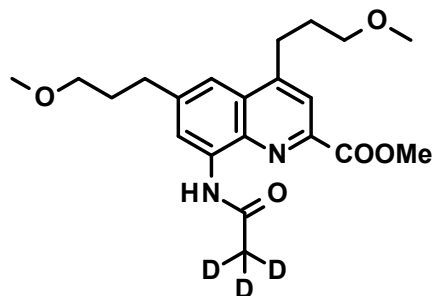

Using **General Procedure 4A** and 250 mg **methyl 4,6-bis(3-methoxyprop-1-ynyl)-8-[(2,2,2-trideuterioacetyl)amino]quinoline-2-carboxylate** (86% purity, 0.561 mmol, 1.0 equiv.), 195 mg **methyl 4,6-bis(3-methoxypropyl)-8-[(2,2,2-trideuterioacetyl)amino]quinoline-2-carboxylate** was obtained as a yellow oil (85% purity, 0.423 mmol, 76%).

$^1\text{H NMR}$  (500 MHz,  $[\text{D}_6]\text{DMSO}$ ):  $\delta$  9.86 (s, 1H, NH), 8.56 (d,  $J = 1.3$  Hz, 1H, Ar-H), 7.99 (s, 1H, Ar-H), 7.65 (d,  $J = 1.3$  Hz, 1H, Ar-H), 3.97 (s, 3H,  $\text{C}(\text{O})\text{OCH}_3$ ), 3.40 (t,  $J = 6.1$  Hz, 2H,  $\text{CH}_2$ ), 3.37 (t,  $J = 6.1$  Hz, 2H,  $\text{CH}_2$ ), 3.26 (s, 3H,  $\text{OCH}_3$ ), 3.25 (s, 3H,  $\text{OCH}_3$ ), 3.16 (t,  $J = 7.6$  Hz, 2H,  $\text{CH}_2$ ), 2.84 (t,  $J = 7.6$  Hz, 2H,  $\text{CH}_2$ ), 1.96-1.85 (m, 4H,  $\text{CH}_2$ ). HRMS (ESI):  $m/z$   $[\text{M}+\text{H}]^+$  calcd for  $\text{C}_{21}\text{D}_3\text{H}_{25}\text{N}_2\text{O}_5$ : 392.2259; found: 392.2260.

[Note: The efficiency of the deuteroacylation reaction can be enhanced by following a modified procedure of 5B:

A 25 mL pear-shaped flask equipped with a magnetic stirring bar was filled with 50 mg **methyl 8-amino-4,6-bis(3-methoxyprop-1-ynyl)quinoline-2-carboxylate** (1.0 equiv., 0.144 mmol). The flask was evacuated then backfilled with  $\text{N}_2$  (repeated 3x), then 3 mL MeOD (513 equiv., 73.8 mmol) was added. The mixture was stirred at rt for 1 h, then was concentrated *in vacuo*. This was repeated 5 times. Then 3.53 mg *N,N*-dimethylpyridin-4-amine (0.2 equiv., 0.0289 mmol), 0.117 mL pyridine (10 equiv., 1.44 mmol), and 2.89 mL EtOAc (20 mL/mmol) were added. Then 0.418 mL (2,2,2-trideuterioacetyl) 2,2,2-trideuterioacetate (3 equiv., 0.433 mmol) was added and the mixture was stirred at 50°C for 18 hours. Then it was washed with water, 1 M aq. citric acid solution, sat. aq.  $\text{NaHCO}_3$  solution, dried over  $\text{Na}_2\text{SO}_4$ , filtered and the filtrate was concentrated *in vacuo*. Then the crude product was purified *via* flash chromatography using DCM and MeOH as eluents to afford 57 mg **methyl 4,6-bis(3-methoxypropyl)-8-[(2,2,2-trideuterioacetyl)amino]quinoline-2-carboxylate** (67% purity, 0.0976 mmol, 68%) as a yellow oil.

**Figure S1.** HRMS of the product obtained in the two procedures: 93%D incorporation/position → 96%.

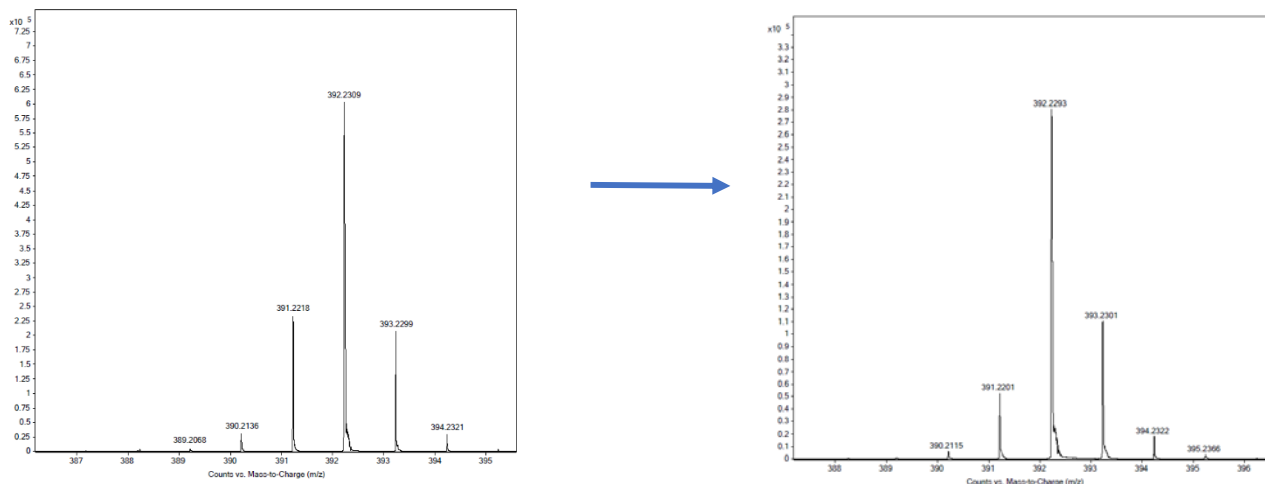

**methyl 8-acetamido-3,5,7-trideuterio-4,6-bis(3-methoxypropyl)quinoline-2-carboxylate (13d)**

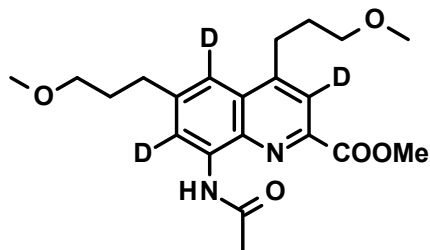

Using **General Procedure 4A** and 400 mg **methyl 8-acetamido-3,5,7-trideuterio-4,6-bis(3-methoxyprop-1-ynyl)quinoline-2-carboxylate** (41% purity, 0.428 mmol, 1.0 equiv.), 180 mg **methyl 8-acetamido-3,5,7-trideuterio-4,6-bis(3-methoxypropyl)quinoline-2-carboxylate** was obtained as a yellow oil (63% purity, 0.290 mmol, 68%).

$^1\text{H NMR}$  (500 MHz,  $[\text{D}_6]\text{DMSO}$ ):  $\delta$  9.86 (s, 1H, NH), 3.97 (s, 3H, C(O)OCH<sub>3</sub>), 3.40 (t,  $J = 6.2$  Hz, 2H, CH<sub>2</sub>), 3.37 (t,  $J = 6.2$  Hz, 2H, CH<sub>2</sub>), 3.26 (s, 3H, OCH<sub>3</sub>), 3.25 (s, 3H, OCH<sub>3</sub>), 3.17 (t,  $J = 7.7$  Hz, 2H, CH<sub>2</sub>), 2.83 (t,  $J = 7.7$  Hz, 2H, CH<sub>2</sub>), 2.28 (s, 3H, C(O)CH<sub>3</sub>), 1.97-1.85 (m, 4H, CH<sub>2</sub>). HRMS (ESI):  $m/z$   $[\text{M}+\text{H}]^+$  calcd for C<sub>21</sub>D<sub>3</sub>H<sub>25</sub>N<sub>2</sub>O<sub>5</sub>: 392.2259; found: 392.2261.

**methyl 3-deuterio-4,6-bis(3-methoxypropyl)-8-[(2,2,2-trideuterioacetyl)amino]quinoline-2-carboxylate (13e)**

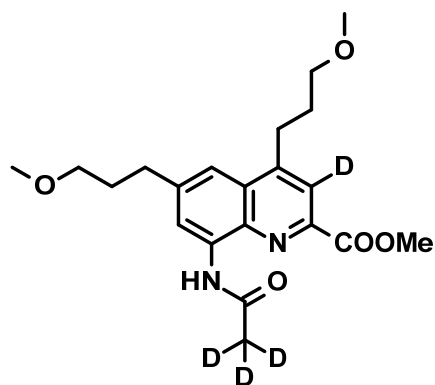

Using **General Procedure 5B** and 380 mg **methyl 8-amino-3-deuterio-4,6-bis(3-methoxypropyl)quinoline-2-carboxylate** (51% purity, 0.558 mmol, 1.0 equiv.), 301 mg **methyl 3-deuterio-4,6-bis(3-methoxypropyl)-8-[(2,2,2-trideuterioacetyl)amino]quinoline-2-carboxylate** was obtained as a yellow oil (65% purity, 0.499 mmol, 89%).

$^1\text{H NMR}$  (500 MHz,  $[\text{D}_6]\text{DMSO}$ ):  $\delta$  9.86 (s, 1H, NH), 8.56 (d,  $J = 1.2$  Hz, 1H, Ar-H), 7.65 (d,  $J = 1.2$  Hz, 1H, Ar-H), 3.97 (s, 3H, C(O)OCH<sub>3</sub>), 3.40 (t,  $J = 6.2$  Hz, 2H, CH<sub>2</sub>), 3.37 (t,  $J = 6.2$  Hz, 2H, CH<sub>2</sub>), 3.26 (s, 3H, OCH<sub>3</sub>), 3.25 (s, 3H, OCH<sub>3</sub>), 3.16 (t,  $J = 7.7$  Hz, 2H, CH<sub>2</sub>), 2.84 (t,  $J = 7.7$  Hz, 2H, CH<sub>2</sub>), 1.97-1.85 (m, 4H, CH<sub>2</sub>). HRMS (ESI):  $m/z$   $[\text{M}+\text{H}]^+$  calcd for C<sub>21</sub>D<sub>4</sub>H<sub>24</sub>N<sub>2</sub>O<sub>5</sub>: 393.2322; found: 393.2324.

**methyl 5,7-dideuterio-4,6-bis(3-methoxypropyl)-8-[(2,2,2-trideuterioacetyl)amino]quinoline-2-carboxylate (13f)**

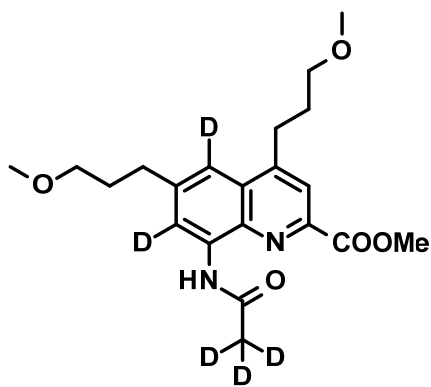

Using **General Procedure 5B** and 228 mg **methyl 8-amino-5,7-dideuterio-4,6-bis(3-methoxypropyl)quinoline-2-carboxylate** (0.581 mmol, 1.0 equiv.), 240 mg **methyl 5,7-dideuterio-4,6-bis(3-methoxypropyl)-8-[(2,2,2-trideuterioacetyl)amino]quinoline-2-carboxylate** was obtained as a yellow oil (87% purity, 0.531 mmol, 91%).

$^1\text{H NMR}$  (500 MHz,  $[\text{D}_6]\text{DMSO}$ ):  $\delta$  9.86 (s, 1H, NH), 8.00 (s, 1H, Ar-H), 3.97 (s, 3H, C(O)OCH<sub>3</sub>), 3.40 (t,  $J = 6.2$  Hz, 2H, CH<sub>2</sub>), 3.37 (t,  $J = 6.2$  Hz, 2H, CH<sub>2</sub>), 3.26 (s, 3H, OCH<sub>3</sub>), 3.25 (s, 3H, OCH<sub>3</sub>), 3.17 (t,  $J = 7.6$  Hz, 2H, CH<sub>2</sub>), 2.84 (t,  $J = 7.6$  Hz, 2H, CH<sub>2</sub>), 1.97-1.85 (m, 4H, CH<sub>2</sub>). HRMS (ESI):  $m/z$   $[\text{M}+\text{H}]^+$  calcd for

$\text{C}_{21}\text{D}_5\text{H}_{23}\text{N}_2\text{O}_5$ : 394.2385; found: 394.2386.

**methyl 8-acetamido-4,6-bis[3-(trideuteriomethoxy)prop-1-ynyl]quinoline-2-carboxylate (32)**

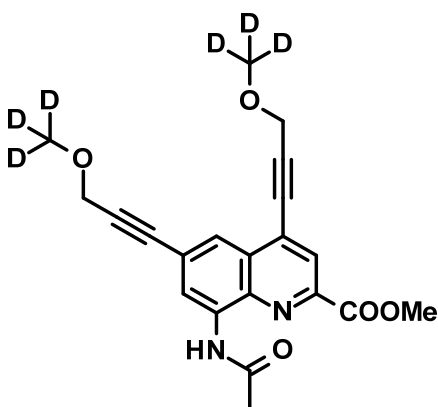

Using **General Procedure 5A** and 300 mg **methyl 8-amino-4,6-bis[3-(trideuteriomethoxy)prop-1-ynyl]quinoline-2-carboxylate** (84% purity, 0.732 mmol, 1.0 equiv), 344 mg **methyl 8-acetamido-4,6-bis[3-(trideuteriomethoxy)prop-1-ynyl]quinoline-2-carboxylate** was obtained as a yellow solid (67% purity, 0.597 mmol, 82%).

$^1\text{H NMR}$  (400 MHz,  $[\text{D}_6]\text{DMSO}$ ):  $\delta$  9.92 (s, 1H, NH), 8.69 (d,  $J = 1.5$  Hz, 1H, Ar-H), 8.22 (s, 1H, Ar-H), 7.94 (d,  $J = 1.5$  Hz, 1H, Ar-H), 4.57 (s, 2H, CH<sub>2</sub>), 4.43 (s, 2H, CH<sub>2</sub>), 3.99 (s, 3H, C(O)OCH<sub>3</sub>), 2.31 (s, 3H, C(O)CH<sub>3</sub>).  $^{13}\text{C NMR}$  (100 MHz,  $[\text{D}_6]\text{DMSO}$ ):  $\delta$  169.2, 164.3, 146.2, 137.0, 136.2, 129.7, 128.0, 124.6, 123.6, 121.6, 119.6, 98.4, 89.2, 85.3, 80.5, 59.5, 59.4, 53.1, 24.7. HRMS (ESI):

$m/z$   $[\text{M}+\text{H}]^+$  calcd for  $\text{C}_{21}\text{D}_6\text{H}_{14}\text{N}_2\text{O}_5$ : 387.1822; found: 387.1826.

**methyl 8-acetamido-4,6-bis[3-(trideuteriomethoxy)propyl]quinoline-2-carboxylate (13g)**

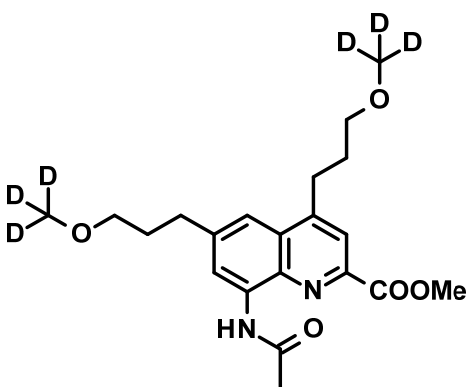

Using **General Procedure 5A** and 300 mg **methyl 8-amino-4,6-bis[3-(trideuteriomethoxy)propyl]quinoline-2-carboxylate** (93% purity, 0.792 mmol, 1.0 equiv.), 301 mg **methyl 8-acetamido-4,6-bis[3-(trideuteriomethoxy)propyl]quinoline-2-carboxylate** was obtained as a yellow oil (92% purity, 0.720 mmol, 89%).

$^1\text{H NMR}$  (500 MHz,  $[\text{D}_6]\text{DMSO}$ ):  $\delta$  9.85 (s, 1H, NH), 8.55 (d,  $J = 1.5$  Hz, 1H, Ar-H), 7.99 (s, 1H, Ar-H), 7.65 (d,  $J = 1.5$  Hz, 1H, Ar-H), 3.97 (s, 3H, C(O)OCH<sub>3</sub>), 3.39 (t,  $J = 6.2$  Hz, 2H, CH<sub>2</sub>), 3.37 (t,  $J = 6.2$  Hz, 2H, CH<sub>2</sub>), 3.16 (t,  $J = 7.7$  Hz, 2H, CH<sub>2</sub>), 2.83 (t,  $J = 7.7$  Hz, 2H, CH<sub>2</sub>), 2.28 (s, 3H, C(O)CH<sub>3</sub>), 1.97-1.85 (m, 4H, CH<sub>2</sub>). HRMS (ESI):  $m/z$   $[\text{M}+\text{H}]^+$  calcd for  $\text{C}_{21}\text{D}_6\text{H}_{22}\text{N}_2\text{O}_5$ :

395.2448; found: 395.2449.

**methyl 8-acetamido-3-deuterio-4,6-bis[3-(trideuteriomethoxy)propyl]quinoline-2-carboxylate (13h)**

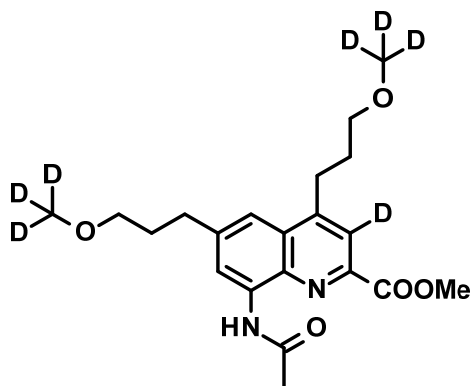

Using **General Procedure 5A** and 300 mg **methyl 8-amino-3-deuterio-4,6-bis[3-(trideuteriomethoxy)propyl]quinoline-2-carboxylate** (87% purity, 0.7383 mmol, 1.0 equiv.), 302 mg **methyl 8-acetamido-3-deuterio-4,6-bis[3-(trideuteriomethoxy)propyl]quinoline-2-carboxylate** was obtained as a yellow oil (90% purity, 0.687 mmol, 93%).

$^1\text{H NMR}$  (400 MHz,  $[\text{D}_6]\text{DMSO}$ ):  $\delta$  9.86 (s, 1H, NH), 8.55 (d,  $J = 1.2$  Hz, 1H, Ar-H), 7.65 (d,  $J = 1.2$  Hz, 1H, Ar-H), 3.97 (s, 3H,  $\text{C}(\text{O})\text{OCH}_3$ ), 3.39 (t,  $J = 6.2$  Hz, 2H,  $\text{CH}_2$ ), 3.37 (t,  $J = 6.2$  Hz, 2H,  $\text{CH}_2$ ), 3.16 (t,  $J = 7.7$  Hz, 2H,  $\text{CH}_2$ ), 2.83 (t,  $J = 7.7$  Hz, 2H,  $\text{CH}_2$ ), 2.28 (s, 3H,  $\text{C}(\text{O})\text{CH}_3$ ), 1.97-1.85 (m, 4H,  $\text{CH}_2$ ).

HRMS (ESI):  $m/z$   $[\text{M}+\text{H}]^+$  calcd for  $\text{C}_{21}\text{D}_7\text{H}_{21}\text{N}_2\text{O}_5$ : 396.2510; found: 396.2509.

**methyl 8-acetamido-3-deuterio-4,6-bis[3-(trideuteriomethoxy)prop-1-ynyl]quinoline-2-carboxylate (33)**

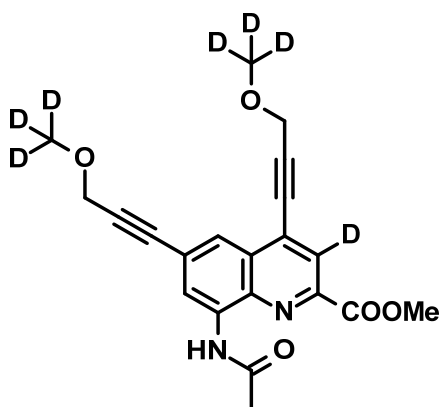

Using **General Procedure 5A** and 330 mg **methyl 8-amino-3-deuterio-4,6-bis[3-(trideuteriomethoxy)prop-1-ynyl]quinoline-2-carboxylate** (82% purity, 0.721 mmol, 1.0 equiv.), 433 mg **methyl 8-acetamido-3-deuterio-4,6-bis[3-(trideuteriomethoxy)prop-1-ynyl]quinoline-2-carboxylate** (57% purity, 0.637 mmol, 88%) as yellow solid.

$^1\text{H NMR}$  (400 MHz,  $[\text{D}_6]\text{DMSO}$ ):  $\delta$  9.87 (s, 1H, NH), 8.65 (d,  $J = 1.7$  Hz, 1H, Ar-H), 7.87 (d,  $J = 1.7$  Hz, 1H, Ar-H), 4.57 (s, 2H,  $\text{CH}_2$ ), 4.42 (s, 2H,  $\text{CH}_2$ ), 3.99 (s, 3H,  $\text{C}(\text{O})\text{OCH}_3$ ), 2.31 (s, 3H,  $\text{C}(\text{O})\text{CH}_3$ ).  $^{13}\text{C NMR}$  (100 MHz,  $[\text{D}_6]\text{DMSO}$ ):  $\delta$  169.2, 164.2, 146.0, 136.9, 136.1, 129.6, 127.9, 123.6, 121.6, 119.4, 98.4, 89.2, 85.3, 80.4, 59.5, 59.4, 53.1, 24.7. HRMS (ESI):  $m/z$   $[\text{M}+\text{H}]^+$  calcd for

$\text{C}_{21}\text{D}_7\text{H}_{13}\text{N}_2\text{O}_5$ : 388.1884; found: 388.1884.

**methyl 8-acetamido-5,7-dideuterio-4,6-bis[3-(trideuteriomethoxy)prop-1-ynyl]quinoline-2-carboxylate (34)**

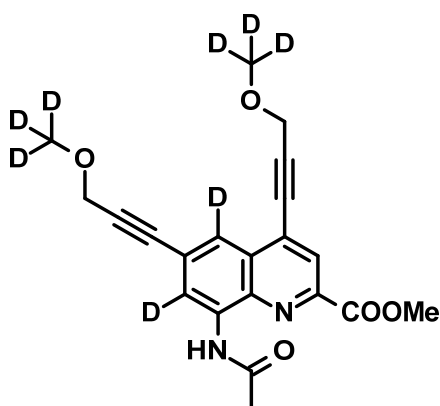

Using **General Procedure 5A** and 300 mg **methyl 8-amino-5,7-dideuterio-4,6-bis[3-(trideuteriomethoxy)prop-1-ynyl]quinoline-2-carboxylate** (72% purity, 0.624 mmol, 1.0 equiv.), 300 mg **methyl 8-acetamido-5,7-dideuterio-4,6-bis[3-(trideuteriomethoxy)prop-1-ynyl]quinoline-2-carboxylate** (69% purity, 0.533 mmol, 85%) as yellow solid.

$^1\text{H NMR}$  (400 MHz,  $[\text{D}_6]\text{DMSO}$ ):  $\delta$  9.87 (s, 1H, NH), 8.17 (s, 1H, Ar-H), 4.57 (s, 2H,  $\text{CH}_2$ ), 4.42 (s, 2H,  $\text{CH}_2$ ), 3.99 (s, 3H,  $\text{C}(\text{O})\text{OCH}_3$ ), 2.31 (s, 3H,  $\text{C}(\text{O})\text{CH}_3$ ).  $^{13}\text{C NMR}$  (100 MHz,  $[\text{D}_6]\text{DMSO}$ ):  $\delta$  169.2, 164.2, 146.1, 136.9, 136.0, 129.7, 127.8, 124.6, 123.4, 98.4, 89.3, 85.3, 80.5, 59.5, 59.4, 53.1, 24.7. HRMS (ESI):  $m/z$   $[\text{M}+\text{H}]^+$  calcd for  $\text{C}_{21}\text{D}_8\text{H}_{12}\text{N}_2\text{O}_5$ : 389.1947; found: 389.1948.

**methyl 8-acetamido-5,7-dideuterio-4,6-bis[3-(trideuteriomethoxy)propyl]quinoline-2-carboxylate (13i)**

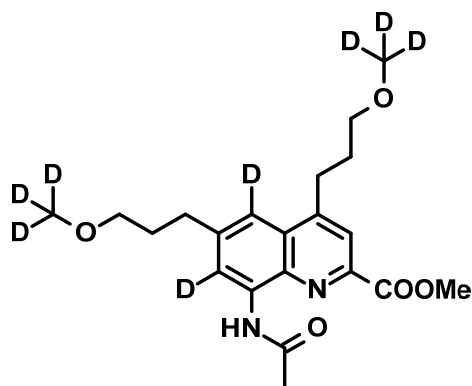

$C_{21}D_8H_{20}N_2O_5$ : 397.2573; found: 397.2573.

Using **General Procedure 5A** and 270 mg **methyl 8-amino-5,7-dideuterio-4,6-bis[3-(trideuteriomethoxy)propyl]quinoline-2-carboxylate** (84% purity, 0.640 mmol, 1.0 equiv.), 256 mg **methyl 8-acetamido-5,7-dideuterio-4,6-bis[3-(trideuteriomethoxy)propyl]quinoline-2-carboxylate** was obtained as a yellow oil (87% purity, 0.562 mmol, 88%).

$^1H$  NMR (400 MHz,  $[D_6]DMSO$ ):  $\delta$  9.86 (s, 1H, NH), 8.00 (s, 1H, Ar-H), 3.97 (s, 3H, C(O)OCH<sub>3</sub>), 3.39 (t,  $J$  = 6.4 Hz, 2H, CH<sub>2</sub>), 3.37 (t,  $J$  = 6.4 Hz, 2H, CH<sub>2</sub>), 3.16 (t,  $J$  = 7.7 Hz, 2H, CH<sub>2</sub>), 2.83 (t,  $J$  = 7.7 Hz, 2H, CH<sub>2</sub>), 2.28 (s, 3H, C(O)CH<sub>3</sub>), 1.97-1.85 (m, 4H, CH<sub>2</sub>). HRMS (ESI):  $m/z$   $[M+H]^+$  calcd for

**methyl 8-acetamido-4,6-bis(1,1,2,2-tetradeuterio-3-methoxy-propyl)quinoline-2-carboxylate (35)**

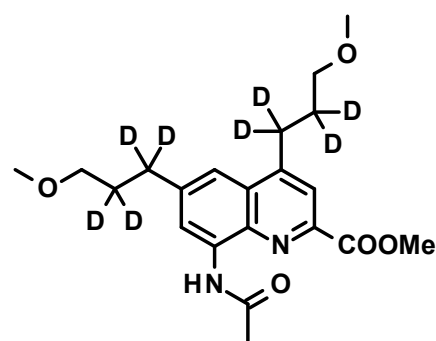

$C_{21}D_8H_{20}N_2O_5$ : 397.2573; found: 397.2577.

Using **General Procedure 5A** and 284 mg **methyl 8-amino-4,6-bis(1,1,2,2-tetradeuterio-3-methoxy-propyl)quinoline-2-carboxylate** (88% purity, 0.705 mmol, 1.0 equiv.), 271 mg **methyl 8-acetamido-4,6-bis(1,1,2,2-tetradeuterio-3-methoxy-propyl)quinoline-2-carboxylate** was obtained as a yellow oil (94% purity, 0.643 mmol, 91%).

$^1H$  NMR (500 MHz,  $[D_6]DMSO$ ):  $\delta$  9.86 (s, 1H, NH), 8.55 (d,  $J$  = 1.5 Hz, 1H, Ar-H), 7.99 (s, 1H, Ar-H), 7.64 (d,  $J$  = 1.5 Hz, 1H, Ar-H), 3.97 (s, 3H, C(O)OCH<sub>3</sub>), 3.38 (s, 2H, CH<sub>2</sub>), 3.36 (s, 2H, CH<sub>2</sub>), 3.26 (s, 3H, OCH<sub>3</sub>), 3.25 (s, 3H, OCH<sub>3</sub>),

**methyl 8-[(2,2,2-trideuterioacetyl)amino]-4,6-bis[3-(trideuteriomethoxy)propyl]quinoline-2-carboxylate (13j)**

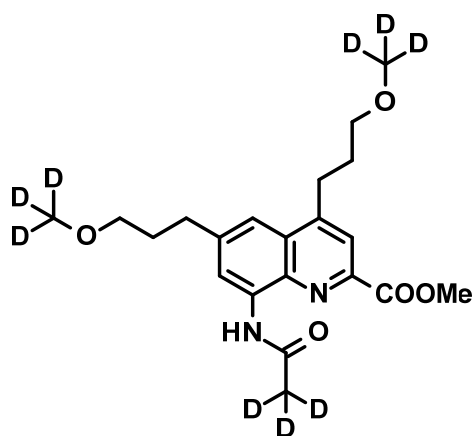

398.2637.

Using **General Procedure 5B** and 300 mg **methyl 8-amino-4,6-bis[3-(trideuteriomethoxy)propyl]quinoline-2-carboxylate** (93% purity, 0.792 mmol, 1.0 equiv.), 303 mg **methyl 8-[(2,2,2-trideuterioacetyl)amino]-4,6-bis[3-(trideuteriomethoxy)propyl]quinoline-2-carboxylate** was obtained as a yellow oil (92% purity, 0.701 mmol, 89%).

$^1H$  NMR (500 MHz,  $[D_6]DMSO$ ):  $\delta$  9.86 (s, 1H, NH), 8.56 (d,  $J$  = 1.2 Hz, 1H, Ar-H), 8.00 (s, 1H, Ar-H), 7.66 (d,  $J$  = 1.2 Hz, 1H, Ar-H), 3.97 (s, 3H, C(O)OCH<sub>3</sub>), 3.39 (t,  $J$  = 6.1 Hz, 2H, CH<sub>2</sub>), 3.37 (t,  $J$  = 6.1 Hz, 2H, CH<sub>2</sub>), 3.1 (t,  $J$  = 7.3 Hz, 2H, CH<sub>2</sub>), 2.83 (t,  $J$  = 7.3 Hz, 2H, CH<sub>2</sub>), 1.97-1.85 (m, 4H, CH<sub>2</sub>). HRMS (ESI):  $m/z$   $[M+H]^+$  calcd for  $C_{21}D_9H_{19}N_2O_5$ : 398.2636; found:



**methyl 8-acetamido-3-deuterio-4,6-bis(1,1,2,2-tetradeuterio-3-methoxy-propyl)quinoline-2-carboxylate (36)**

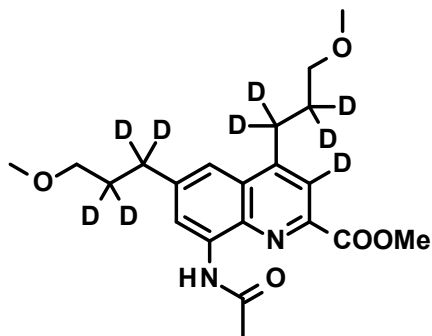

Using **General Procedure 5A** and 350 mg **methyl 8-amino-3-deuterio-4,6-bis(1,1,2,2-tetradeuterio-3-methoxy-propyl)quinoline-2-carboxylate** (91% purity, 0.896 mmol, 1.0 equiv.), 372 mg **methyl 8-acetamido-3-deuterio-4,6-bis(1,1,2,2-tetradeuterio-3-methoxy-propyl)quinoline-2-carboxylate** was obtained as a yellow oil (92% purity, 0.861 mmol, 96%).

$^1\text{H NMR}$  (400 MHz,  $[\text{D}_6]\text{DMSO}$ ):  $\delta$  9.86 (s, 1H, NH), 8.56 (d,  $J = 1.4$  Hz, 1H, Ar-H), 7.65 (d,  $J = 1.4$  Hz, 1H, Ar-H), 3.97 (s, 3H, C(O)OCH<sub>3</sub>), 3.38 (s, 2H, CH<sub>2</sub>), 3.36 (s, 2H, CH<sub>2</sub>), 3.26 (s, 3H, OCH<sub>3</sub>), 3.25 (s, 3H, OCH<sub>3</sub>), 2.28 (s, 3H, C(O)CH<sub>3</sub>). HRMS (ESI):  $m/z$   $[\text{M}+\text{H}]^+$  calcd for  $\text{C}_{21}\text{D}_9\text{H}_{19}\text{N}_2\text{O}_5$ : 398.2636; found:

398.2637.

**methyl 3-deuterio-8-[(2,2,2-trideuterioacetyl)amino]-4,6-bis[3-(trideuteriomethoxy)prop-1-ynyl]quinoline-2-carboxylate (37)**

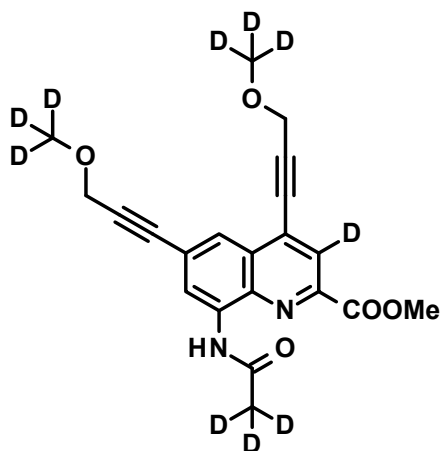

Using **General Procedure 5B** and 300 mg **methyl 8-amino-4,6-bis[3-(trideuteriomethoxy)prop-1-ynyl]quinoline-2-carboxylate** (87% purity, 0.756 mmol, 1.0 equiv.), 198 mg **methyl 3-deuterio-8-[(2,2,2-trideuterioacetyl)amino]-4,6-bis[3-(trideuteriomethoxy)prop-1-ynyl]quinoline-2-carboxylate** was obtained as a yellow solid (79% purity, 0.401 mmol, 53%).

$^1\text{H NMR}$  (500 MHz,  $[\text{D}_6]\text{DMSO}$ ):  $\delta$  9.87 (s, 1H, NH), 8.66 (d,  $J = 1.7$  Hz, 1H, Ar-H), 7.88 (d,  $J = 1.7$  Hz, 1H, Ar-H), 4.57 (s, 2H, CH<sub>2</sub>), 4.42 (s, 2H, CH<sub>2</sub>), 3.99 (s, 3H, C(O)OCH<sub>3</sub>).  $^{13}\text{C NMR}$  (125 MHz,  $[\text{D}_6]\text{DMSO}$ ):  $\delta$  169.3, 164.2, 146.0, 136.9, 136.1, 129.6, 127.9, 123.6, 121.6, 119.4, 98.4, 89.2, 85.3, 80.4, 59.5, 59.4, 53.1. HRMS (ESI):  $m/z$   $[\text{M}+\text{H}]^+$  calcd for  $\text{C}_{21}\text{D}_{10}\text{H}_{10}\text{N}_2\text{O}_5$ : 391.2073; found:

391.2073.

**methyl 3-deuterio-8-[(2,2,2-trideuterioacetyl)amino]-4,6-bis[3-(trideuteriomethoxy)propyl]quinoline-2-carboxylate (13k)**

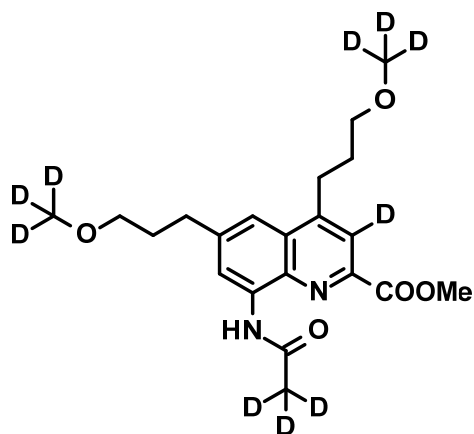

Using **General Procedure 5B** and 210 mg **methyl 8-amino-3-deuterio-4,6-bis[3-(trideuteriomethoxy)propyl]quinoline-2-carboxylate** (87% purity, 0.517 mmol, 1.0 equiv.), 214 mg **methyl 3-deuterio-8-[(2,2,2-trideuterioacetyl)amino]-4,6-bis[3-(trideuteriomethoxy)propyl]quinoline-2-carboxylate** was obtained as a yellow oil (82% purity, 0.440 mmol, 85%).

$^1\text{H NMR}$  (400 MHz,  $[\text{D}_6]\text{DMSO}$ ):  $\delta$  9.86 (s, 1H, NH), 8.56 (d,  $J = 1.2$  Hz, 1H, Ar-H), 7.65 (d,  $J = 1.2$  Hz, 1H, Ar-H), 3.97 (s, 3H, C(O)OCH<sub>3</sub>), 3.39 (t,  $J = 6.3$  Hz, 2H, CH<sub>2</sub>), 3.37 (t,  $J = 6.3$  Hz, 2H, CH<sub>2</sub>), 3.10 (t,  $J = 7.8$  Hz, 2H, CH<sub>2</sub>), 2.83 (t,  $J = 7.8$  Hz, 2H, CH<sub>2</sub>), 1.97-1.85 (m, 4H, CH<sub>2</sub>). HRMS (ESI):  $m/z$

$[\text{M}+\text{H}]^+$  calcd for  $\text{C}_{21}\text{D}_{10}\text{H}_{18}\text{N}_2\text{O}_5$ : 399.2699; found: 399.2701.

**methyl 5,7-dideuterio-8-[(2,2,2-trideuterioacetyl)amino]-4,6-bis[3-(trideuteriomethoxy)propyl]quinoline-2-carboxylate (13l)**

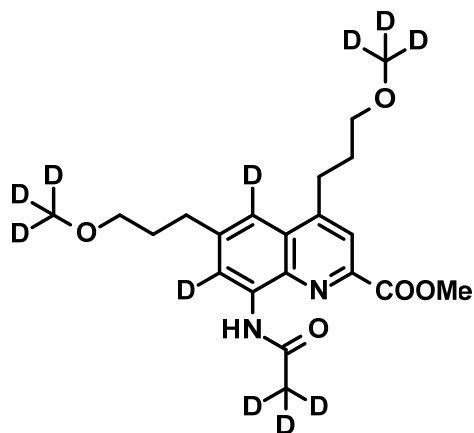

found: 400.2761.

Using **General Procedure 5B** and 161 mg **methyl 8-amino-5,7-dideuterio-4,6-bis[3-(trideuteriomethoxy)propyl]quinoline-2-carboxylate** (84% purity, 0.382 mmol, 1.0 equiv.), 172 mg **methyl 5,7-dideuterio-8-[(2,2,2-trideuterioacetyl)amino]-4,6-bis[3-(trideuteriomethoxy)propyl]quinoline-2-carboxylate** was obtained as a yellow oil (77% purity, 0.332 mmol, 87%).

$^1\text{H NMR}$  (400 MHz,  $[\text{D}_6]\text{DMSO}$ ):  $\delta$  9.86 (s, 1H, NH), 8.00 (s, 1H, Ar-H), 3.97 (s, 3H, C(O)OCH<sub>3</sub>), 3.39 (t,  $J = 6.2$  Hz, 2H, CH<sub>2</sub>), 3.37 (t,  $J = 6.2$  Hz, 2H, CH<sub>2</sub>), 3.15 (t,  $J = 7.7$  Hz, 2H, CH<sub>2</sub>), 2.83 (t,  $J = 7.7$  Hz, 2H, CH<sub>2</sub>), 1.97-1.85 (m, 4H, CH<sub>2</sub>). HRMS (ESI):  $m/z$   $[\text{M}+\text{H}]^+$  calcd for C<sub>21</sub>D<sub>11</sub>H<sub>17</sub>N<sub>2</sub>O<sub>5</sub>: 400.2761;

**methyl 3-deuterio-4,6-bis(1,1,2,2-tetradeuterio-3-methoxy-propyl)-8-[(2,2,2-trideuterioacetyl)amino]quinoline-2-carboxylate (13m)**

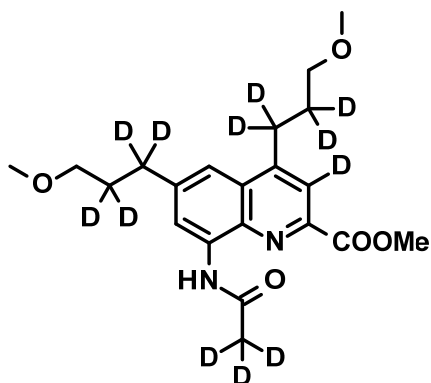

$[\text{M}+\text{H}]^+$  calcd for C<sub>21</sub>D<sub>12</sub>H<sub>16</sub>N<sub>2</sub>O<sub>5</sub>: 401.2824; found: 401.2822.

Using **General Procedure 5B** and 165 mg **methyl 8-amino-3-deuterio-4,6-bis(1,1,2,2-tetradeuterio-3-methoxy-propyl)quinoline-2-carboxylate** (82% purity, 0.381 mmol, 1.0 equiv.), 167 mg **methyl 3-deuterio-4,6-bis(1,1,2,2-tetradeuterio-3-methoxy-propyl)-8-[(2,2,2-trideuterioacetyl)amino]quinoline-2-carboxylate** was obtained as a yellow oil (81% purity, 0.338 mmol, 89%).

$^1\text{H NMR}$  (400 MHz,  $[\text{D}_6]\text{DMSO}$ ):  $\delta$  9.86 (s, 1H, NH), 8.56 (d,  $J = 1.6$  Hz, 1H, Ar-H), 7.65 (d,  $J = 1.6$  Hz, 1H, Ar-H), 3.97 (s, 3H, C(O)OCH<sub>3</sub>), 3.38 (s, 2H, CH<sub>2</sub>), 3.36 (s, 2H, CH<sub>2</sub>), 3.26 (s, 3H, OCH<sub>3</sub>), 3.25 (s, 3H, OCH<sub>3</sub>). HRMS (ESI):  $m/z$

**methyl 5,7-dideuterio-4,6-bis(1,1,2,2-tetradeuterio-3-methoxy-propyl)-8-[(2,2,2-trideuterioacetyl)amino]quinoline-2-carboxylate (13n)**

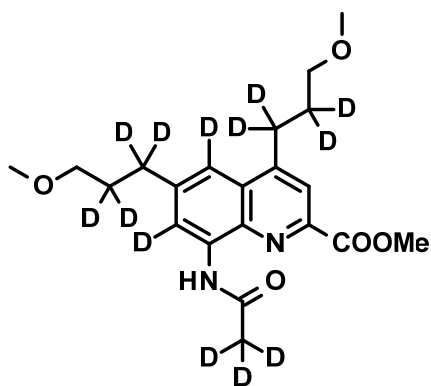

found: 402.2886.

Using **General Procedure 5B** and 175 mg **methyl 8-amino-5,7-dideuterio-4,6-bis(1,1,2,2-tetradeuterio-3-methoxy-propyl)quinoline-2-carboxylate** (79% purity, 0.388 mmol, 1.0 equiv.), 188 mg **methyl 5,7-dideuterio-4,6-bis(1,1,2,2-tetradeuterio-3-methoxy-propyl)-8-[(2,2,2-trideuterioacetyl)amino]quinoline-2-carboxylate** was obtained as a yellow oil (70% purity, 0.328 mmol, 85%).

$^1\text{H NMR}$  (500 MHz,  $[\text{D}_6]\text{DMSO}$ ):  $\delta$  9.86 (s, 1H, NH), 8.00 (s, 1H, Ar-H), 3.97 (s, 3H, C(O)OCH<sub>3</sub>), 3.38 (s, 2H, CH<sub>2</sub>), 3.36 (s, 2H, CH<sub>2</sub>), 3.26 (s, 3H, OCH<sub>3</sub>), 3.25 (s, 3H, OCH<sub>3</sub>). HRMS (ESI):  $m/z$   $[\text{M}+\text{H}]^+$  calcd for C<sub>21</sub>D<sub>13</sub>H<sub>15</sub>N<sub>2</sub>O<sub>5</sub>: 402.2887;

**methyl 8-acetamido-4,6-bis[1,1,2,2-tetradeuterio-3-(trideuteriomethoxy)propyl]quinoline-2-carboxylate (13o)**

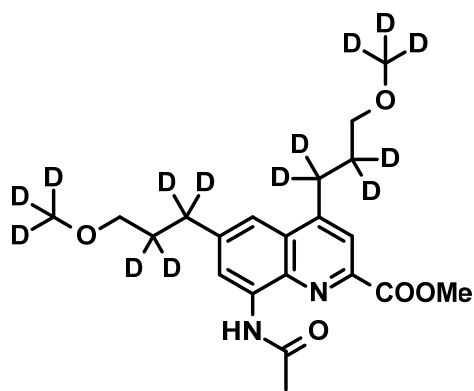

403.2951.

Using **General Procedure 4B** and 320 mg **methyl 8-acetamido-4,6-bis[3-(trideuteriomethoxy)prop-1-ynyl]quinoline-2-carboxylate** (67% purity, 0.555 mmol, 1.0 equiv.), 203 mg **methyl 8-acetamido-4,6-bis[1,1,2,2-tetradeuterio-3-(trideuteriomethoxy)propyl]quinoline-2-carboxylate** was obtained as a yellow oil (87% purity, 0.439 mmol, 79%).

$^1\text{H NMR}$  (500 MHz,  $[\text{D}_6]\text{DMSO}$ ):  $\delta$  9.86 (s, 1H, NH), 8.55 (d,  $J = 1.6$  Hz, 1H, Ar-H), 8.00 (s, 1H, Ar-H), 7.66 (d,  $J = 1.6$  Hz, 1H, Ar-H), 3.97 (s, 3H,  $\text{C}(\text{O})\text{OCH}_3$ ), 3.38 (s, 2H,  $\text{CH}_2$ ), 3.36 (s, 2H,  $\text{CH}_2$ ), 2.28 (s, 3H,  $\text{C}(\text{O})\text{CH}_3$ ). HRMS (ESI):  $m/z$   $[\text{M}+\text{H}]^+$  calcd for  $\text{C}_{21}\text{D}_{14}\text{H}_{14}\text{N}_2\text{O}_5$ : 403.2950; found:

**methyl 8-acetamido-3-deuterio-4,6-bis[1,1,2,2-tetradeuterio-3-(trideuteriomethoxy)propyl]quinoline-2-carboxylate (13p)**

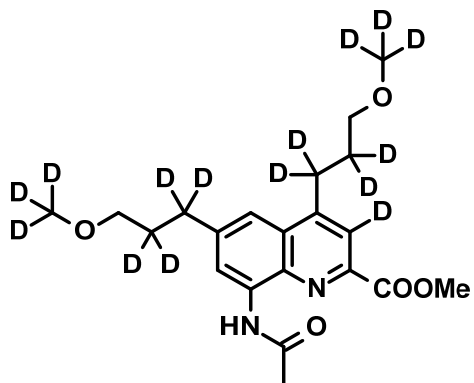

calcd for  $\text{C}_{21}\text{D}_{15}\text{H}_{13}\text{N}_2\text{O}_5$ : 404.3012; found: 404.3014.

Using **General Procedure 4B** and 300 mg **methyl 8-acetamido-3-deuterio-4,6-bis[3-(trideuteriomethoxy)prop-1-ynyl]quinoline-2-carboxylate** (57% purity, 0.441 mmol, 1.0 equiv.), 202 mg **methyl 8-acetamido-3-deuterio-4,6-bis[1,1,2,2-tetradeuterio-3-(trideuteriomethoxy)propyl]quinoline-2-carboxylate** was obtained as a yellow oil (65% purity, 0.325 mmol, 74%).

$^1\text{H NMR}$  (400 MHz,  $[\text{D}_6]\text{DMSO}$ ):  $\delta$  9.86 (s, 1H, NH), 8.55 (d,  $J = 1.7$  Hz, 1H, Ar-H), 7.65 (d,  $J = 1.7$  Hz, 1H, Ar-H), 3.97 (s, 3H,  $\text{C}(\text{O})\text{OCH}_3$ ), 3.38 (s, 2H,  $\text{CH}_2$ ), 3.36 (s, 2H,  $\text{CH}_2$ ), 2.28 (s, 3H,  $\text{C}(\text{O})\text{CH}_3$ ). HRMS (ESI):  $m/z$   $[\text{M}+\text{H}]^+$

**methyl 8-acetamido-5,7-dideuterio-4,6-bis[1,1,2,2-tetradeuterio-3-(trideuteriomethoxy)propyl]quinoline-2-carboxylate (13q)**

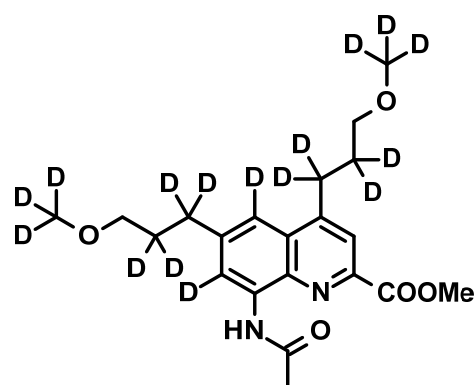

found: 405.3080.

Using **General Procedure 4B** and 280 mg **methyl 8-acetamido-5,7-dideuterio-4,6-bis[3-(trideuteriomethoxy)prop-1-ynyl]quinoline-2-carboxylate** (69% purity, 0.497 mmol, 1.0 equiv.), 186 mg **methyl 8-acetamido-5,7-dideuterio-4,6-bis[1,1,2,2-tetradeuterio-3-(trideuteriomethoxy)propyl]quinoline-2-carboxylate** was obtained as a yellow oil (74% purity, 0.340 mmol, 68%).

$^1\text{H NMR}$  (400 MHz,  $[\text{D}_6]\text{DMSO}$ ):  $\delta$  9.86 (s, 1H, NH), 7.99 (s, 1H, Ar-H), 3.97 (s, 3H,  $\text{C}(\text{O})\text{OCH}_3$ ), 3.38 (s, 2H,  $\text{CH}_2$ ), 3.36 (s, 2H,  $\text{CH}_2$ ), 2.28 (s, 3H,  $\text{C}(\text{O})\text{CH}_3$ ). HRMS (ESI):  $m/z$   $[\text{M}+\text{H}]^+$  calcd for  $\text{C}_{21}\text{D}_{16}\text{H}_{12}\text{N}_2\text{O}_5$ : 405.3075;

**methyl 4,6-bis[1,1,2,2-tetradeuterio-3-(trideuteriomethoxy)propyl]-8-[(2,2,2-trideuterioacetyl)amino]quinoline-2-carboxylate (13r)**

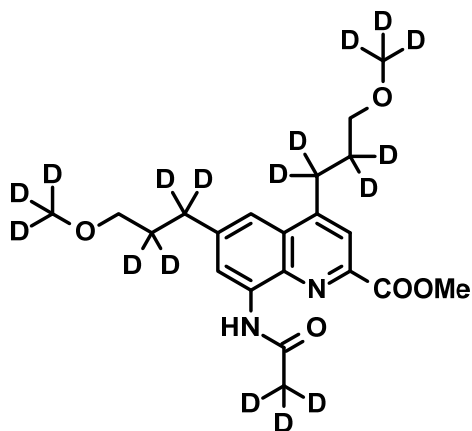

Using **General Procedure 5B** and 114 mg **methyl 8-amino-4,6-bis[1,1,2,2-tetradeuterio-3-(trideuteriomethoxy)propyl]quinoline-2-carboxylate** (88% purity, 0.227 mmol, 1.0 equiv.), 94 mg **methyl 4,6-bis[1,1,2,2-tetradeuterio-3-(trideuteriomethoxy)propyl]-8-[(2,2,2-trideuterioacetyl)amino]quinoline-2-carboxylate** was obtained as a yellow oil (89% purity, 0.206 mmol, 74%).

$^1\text{H NMR}$  (500 MHz,  $[\text{D}_6]\text{DMSO}$ ):  $\delta$  9.86 (s, 1H, NH), 8.56 (d,  $J = 1.5$  Hz, 1H, Ar-H), 8.00 (s, 1H, Ar-H), 7.66 (d,  $J = 1.5$  Hz, 1H, Ar-H), 3.97 (s, 3H,  $\text{C}(\text{O})\text{OCH}_3$ ), 3.38 (s, 2H,  $\text{CH}_2$ ), 3.36 (s, 2H,  $\text{CH}_2$ ). HRMS (ESI):  $m/z$   $[\text{M}+\text{H}]^+$  calcd for  $\text{C}_{21}\text{D}_{17}\text{H}_{11}\text{N}_2\text{O}_5$ : 406.3138; found: 406.3138.

**methyl 3-deuterio-4,6-bis[1,1,2,2-tetradeuterio-3-(trideuteriomethoxy)propyl]-8-[(2,2,2-trideuterioacetyl)amino]quinoline-2-carboxylate (13s)**

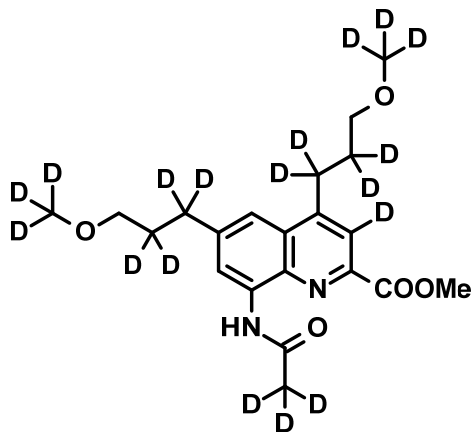

Using **General Procedure 4B** and 100 mg **methyl 3-deuterio-8-[(2,2,2-trideuterioacetyl)amino]-4,6-bis[3-(trideuteriomethoxy)prop-1-ynyl]quinoline-2-carboxylate** (79% purity, 0.497 mmol, 1.0 equiv.), 98 mg **methyl 3-deuterio-4,6-bis[1,1,2,2-tetradeuterio-3-(trideuteriomethoxy)propyl]-8-[(2,2,2-trideuterioacetyl)amino]quinoline-2-carboxylate** was obtained as a yellow oil (81% purity, 0.340 mmol, 97%).

$^1\text{H NMR}$  (500 MHz,  $[\text{D}_6]\text{DMSO}$ ):  $\delta$  9.86 (s, 1H, NH), 8.55 (d,  $J = 1.7$  Hz, 1H, Ar-H), 7.64 (d,  $J = 1.7$  Hz, 1H, Ar-H), 3.97 (s, 3H,  $\text{C}(\text{O})\text{OCH}_3$ ), 3.38 (s, 2H,  $\text{CH}_2$ ), 3.35 (s, 2H,  $\text{CH}_2$ ). HRMS (ESI):  $m/z$   $[\text{M}+\text{H}]^+$  calcd for  $\text{C}_{21}\text{D}_{18}\text{H}_{10}\text{N}_2\text{O}_5$ :

407.3201; found: 407.3202.

**methyl 5,7-dideuterio-4,6-bis[1,1,2,2-tetradeuterio-3-(trideuteriomethoxy)propyl]-8-[(2,2,2-trideuterioacetyl)amino]quinoline-2-carboxylate (13t)**

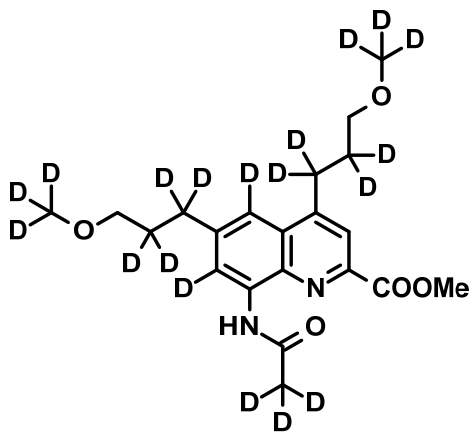

Using **General Procedure 5B** and 150 mg **methyl 8-amino-5,7-dideuterio-4,6-bis[1,1,2,2-tetradeuterio-3-(trideuteriomethoxy)propyl]quinoline-2-carboxylate** (88% purity, 0.364 mmol, 1.0 equiv.), 190 mg **methyl 5,7-dideuterio-4,6-bis[1,1,2,2-tetradeuterio-3-(trideuteriomethoxy)propyl]-8-[(2,2,2-trideuterioacetyl)amino]quinoline-2-carboxylate** was obtained as a yellow oil (70% purity, 0.326 mmol, 90%).

$^1\text{H NMR}$  (400 MHz,  $[\text{D}_6]\text{DMSO}$ ):  $\delta$  9.87 (s, 1H, NH), 8.00 (s, 1H, Ar-H), 3.97 (s, 3H,  $\text{C}(\text{O})\text{OCH}_3$ ), 3.38 (s, 2H,  $\text{CH}_2$ ), 3.36 (s, 2H,  $\text{CH}_2$ ). HRMS (ESI):  $m/z$   $[\text{M}+\text{H}]^+$  calcd for  $\text{C}_{21}\text{D}_{19}\text{H}_9\text{N}_2\text{O}_5$ : 408.3264; found: 408.3262.

**methyl 3,5,7-trideuterio-4,6-bis[1,1,2,2-tetradeuterio-3-(trideuteriomethoxy)propyl]-8-[(2,2,2-trideuterioacetyl)amino]quinoline-2-carboxylate (13u)**

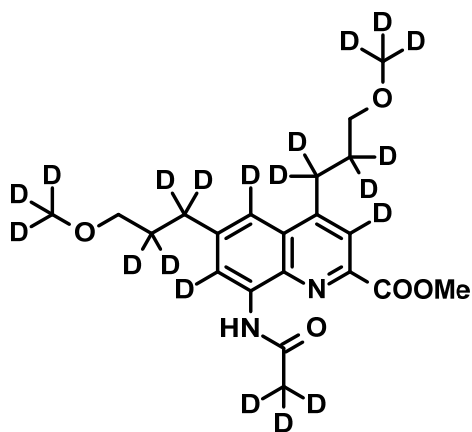

Using **General Procedure 5B** and 175 mg **methyl 8-amino-3,5,7-trideuterio-4,6-bis[1,1,2,2-tetradeuterio-3-(trideuteriomethoxy)propyl]quinoline-2-carboxylate** (80% purity, 0.385 mmol, 1.0 equiv.), 152 mg **methyl 3,5,7-trideuterio-4,6-bis[1,1,2,2-tetradeuterio-3-(trideuteriomethoxy)propyl]-8-[(2,2,2-trideuterioacetyl)amino]quinoline-2-carboxylate** was obtained as a yellow oil (92% purity, 0.342 mmol, 89%).

$^1\text{H NMR}$  (400 MHz,  $[\text{D}_6]\text{DMSO}$ ):  $\delta$  9.87 (s, 1H, NH), 3.97 (s, 3H, C(O)OCH<sub>3</sub>), 3.38 (s, 2H, CH<sub>2</sub>), 3.36 (s, 2H, CH<sub>2</sub>). HRMS (ESI):  $m/z$   $[\text{M}+\text{H}]^+$  calcd for C<sub>21</sub>D<sub>20</sub>H<sub>8</sub>N<sub>2</sub>O<sub>5</sub>: 409.3326; found: 409.3327.

**methyl 4,6-bis[1,1,2,2,3,3-hexadeuterio-3-(trideuteriomethoxy)propyl]-8-[(2,2,2-trideuterioacetyl)amino]quinoline-2-carboxylate (13v)**

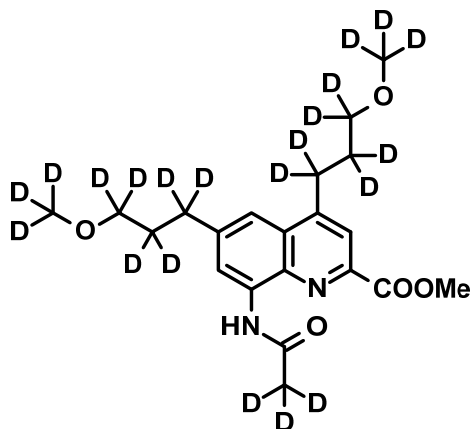

Using **General Procedure 5B** and 320 mg **methyl 8-amino-4,6-bis[1,1,2,2,3,3-hexadeuterio-3-(trideuteriomethoxy)propyl]quinoline-2-carboxylate** (55% purity, 0.483 mmol, 1.0 equiv.), 299 mg **methyl 4,6-bis[1,1,2,2,3,3-hexadeuterio-3-(trideuteriomethoxy)propyl]-8-[(2,2,2-trideuterioacetyl)amino]quinoline-2-carboxylate** was obtained as a yellow oil (63% purity, 0.460 mmol, 95%).

$^1\text{H NMR}$  (500 MHz,  $[\text{D}_6]\text{DMSO}$ ):  $\delta$  9.87 (s, 1H, NH), 8.56 (d,  $J = 1.7$  Hz, 1H, Ar-H), 8.00 (s, 1H, Ar-H), 7.66 (d,  $J = 1.7$  Hz, 1H, Ar-H), 3.97 (s, 3H, C(O)OCH<sub>3</sub>). HRMS (ESI):  $m/z$   $[\text{M}+\text{H}]^+$  calcd for C<sub>21</sub>D<sub>21</sub>H<sub>7</sub>N<sub>2</sub>O<sub>5</sub>: 410.3389; found: 410.3391.

**methyl 3-deuterio-4,6-bis[1,1,2,2,3,3-hexadeuterio-3-(trideuteriomethoxy)propyl]-8-[(2,2,2-trideuterioacetyl)amino]quinoline-2-carboxylate (13w)**

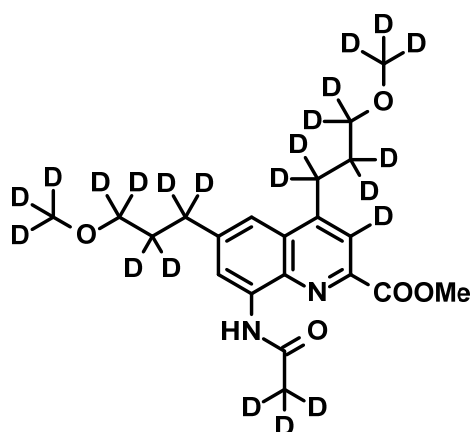

Using **General Procedure 5B** and 290 mg **methyl 8-amino-3-deuterio-4,6-bis[1,1,2,2,3,3-hexadeuterio-3-(trideuteriomethoxy)propyl]quinoline-2-carboxylate** (52% purity, 0.413 mmol, 1.0 equiv.), 274 mg **methyl 3-deuterio-4,6-bis[1,1,2,2,3,3-hexadeuterio-3-(trideuteriomethoxy)propyl]-8-[(2,2,2-trideuterioacetyl)amino]quinoline-2-carboxylate** was obtained as a yellow oil (51% purity, 0.340 mmol, 82%).

$^1\text{H NMR}$  (500 MHz,  $[\text{D}_6]\text{DMSO}$ ):  $\delta$  9.87 (s, 1H, NH), 8.56 (d,  $J = 1.6$  Hz, 1H, Ar-H), 7.66 (d,  $J = 1.6$  Hz, 1H, Ar-H), 3.97 (s, 3H, C(O)OCH<sub>3</sub>). HRMS (ESI):  $m/z$   $[\text{M}+\text{H}]^+$  calcd for C<sub>21</sub>D<sub>22</sub>H<sub>6</sub>N<sub>2</sub>O<sub>5</sub>: 411.3452; found: 411.3450.

**methyl 5,7-dideuterio-4,6-bis[1,1,2,2,3,3-hexadeuterio-3-(trideuteriomethoxy)propyl]-8-[(2,2,2-trideuterioacetyl)amino]quinoline-2-carboxylate (13x)**

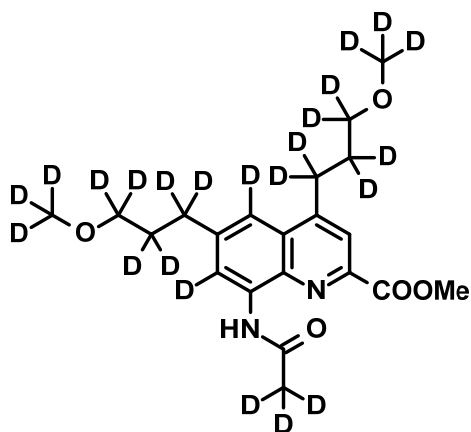

Using **General Procedure 5B** and 230 mg **methyl 8-amino-5,7-dideuterio-4,6-bis[1,1,2,2,3,3-hexadeuterio-3-(trideuteriomethoxy)propyl]quinoline-2-carboxylate** (70% purity, 0.439 mmol, 1.0 equiv.), 222 mg **methyl 5,7-dideuterio-4,6-bis[1,1,2,2,3,3-hexadeuterio-3-(trideuteriomethoxy)propyl]-8-[(2,2,2-trideuterioacetyl)amino]quinoline-2-carboxylate** was obtained as a yellow oil (70% purity, 0.378 mmol, 86%).

$^1\text{H NMR}$  (500 MHz,  $[\text{D}_6]\text{DMSO}$ ): 9.87 (s, 1H, NH), 8.00 (s, 1H, Ar-H), 3.97 (s, 3H, C(O)OCH<sub>3</sub>). HRMS (ESI):  $m/z$   $[\text{M}+\text{H}]^+$  calcd for  $\text{C}_{21}\text{D}_{23}\text{H}_5\text{N}_2\text{O}_5$ : 412.3515; found: 412.3516.

**methyl 3,5,7-trideuterio-4,6-bis[1,1,2,2,3,3-hexadeuterio-3-(trideuteriomethoxy)propyl]-8-[(2,2,2-trideuterioacetyl)amino]quinoline-2-carboxylate (13y)**

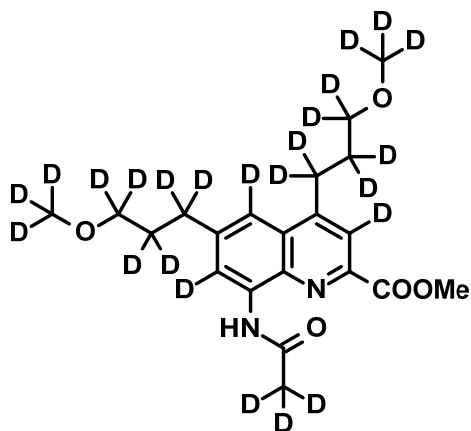

Using **General Procedure 5B** and 220 mg **methyl 8-amino-3,5,7-trideuterio-4,6-bis[1,1,2,2,3,3-hexadeuterio-3-(trideuteriomethoxy)propyl]quinoline-2-carboxylate** (61% purity, 0.365 mmol, 1.0 equiv.), 197 mg **methyl 3,5,7-trideuterio-4,6-bis[1,1,2,2,3,3-hexadeuterio-3-(trideuteriomethoxy)propyl]-8-[(2,2,2-trideuterioacetyl)amino]quinoline-2-carboxylate** was obtained as a yellow oil (62% purity, 0.296 mmol, 81%).

$^1\text{H NMR}$  (500 MHz,  $[\text{D}_6]\text{DMSO}$ ): 9.86 (s, 1H, NH), 3.97 (s, 3H, C(O)OCH<sub>3</sub>). HRMS (ESI):  $m/z$   $[\text{M}+\text{H}]^+$  calcd for  $\text{C}_{21}\text{D}_{24}\text{H}_4\text{N}_2\text{O}_5$ : 413.3577; found: 413.3578.

**8-acetamido-4,6-bis(3-methoxypropyl)quinoline-2-carboxylic acid (1a)**

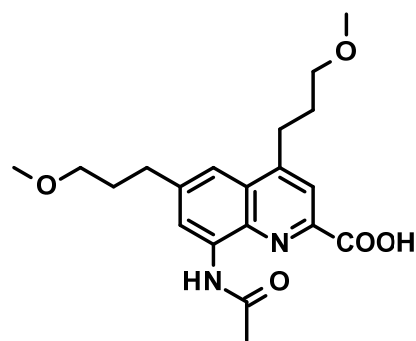

Using **General Procedure 6** and 1.200 g **methyl 8-amino-4,6-bis(3-methoxypropyl)quinoline-2-carboxylate** (3.089 mmol, 1.0 equiv.), 1.130 g **8-acetamido-4,6-bis(3-methoxypropyl)quinoline-2-carboxylic acid** was obtained as a yellow oil (2.976 mmol, 96%).

HPLC-UV purity: 98.6%.

$^1\text{H NMR}$  (500 MHz,  $[\text{D}_6]\text{DMSO}$ ):  $\delta$  13.24 (br s, 1H, COOH), 10.46 (s, 1H, NH), 8.70 (d,  $J = 1.4$  Hz, 1H, Ar-H), 8.02 (s, 1H, Ar-H), 7.64 (d,  $J = 1.4$  Hz, 1H, Ar-H), 3.39 (t,  $J = 6.3$  Hz, 2H, CH<sub>2</sub>), 3.36 (t,  $J = 6.3$  Hz, 2H, CH<sub>2</sub>), 3.26 (s, 3H, OCH<sub>3</sub>),

3.25 (s, 3H, OCH<sub>3</sub>), 3.15 (t,  $J = 7.6$  Hz, 2H, CH<sub>2</sub>), 2.83 (t,  $J = 7.6$  Hz, 2H, CH<sub>2</sub>), 2.32 (s, 3H, C(O)CH<sub>3</sub>), 1.97-1.84 (m, 4H, CH<sub>2</sub>).  $^{13}\text{C NMR}$  (125 MHz,  $[\text{D}_6]\text{DMSO}$ ):  $\delta$  169.3, 165.5, 150.1, 144.1, 143.4, 136.0, 135.6, 128.3, 120.1, 118.3, 116.0, 70.98, 70.97, 57.91, 57.90, 32.8, 30.7, 29.4, 28.2, 24.8. HRMS (ESI):  $m/z$   $[\text{M}+\text{H}]^+$  calcd for  $\text{C}_{20}\text{H}_{26}\text{N}_2\text{O}_5$ : 375.1914; found: 375.1916.

### 8-acetamido-3-deuterio-4,6-bis(3-methoxypropyl)quinoline-2-carboxylic acid (1b)

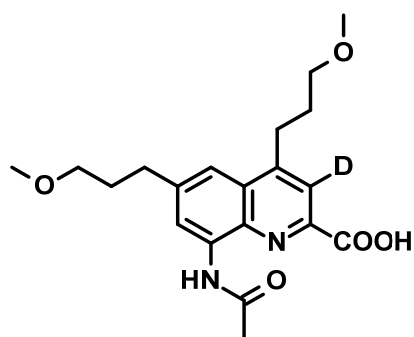

Using **General Procedure 6** and 550 mg **methyl 8-acetamido-3-deuterio-4,6-bis(3-methoxypropyl)quinoline-2-carboxylate** (1.412 mmol, 1.0 equiv.), 294 mg **8-acetamido-3-deuterio-4,6-bis(3-methoxypropyl)quinoline-2-carboxylic acid** was obtained as a yellow oil (0.763 mmol, 54%).

HPLC-UV purity: 97.4%.

$^1\text{H}$  NMR (500 MHz,  $[\text{D}_6]$ DMSO):  $\delta$  10.42 (s, 1H, NH), 8.56 (d,  $J = 1.4$  Hz, 1H, Ar-H), 7.54 (d,  $J = 1.4$  Hz, 1H, Ar-H), 3.38 (t,  $J = 6.3$  Hz, 2H,  $\text{CH}_2$ ), 3.36 (t,  $J = 6.3$  Hz, 2H,  $\text{CH}_2$ ), 3.25 (s, 6H,  $\text{OCH}_3$ ), 3.07 (t,  $J = 7.6$  Hz, 2H,  $\text{CH}_2$ ), 2.80 (t,  $J = 7.6$  Hz, 2H,  $\text{CH}_2$ ), 2.28 (s, 3H,  $\text{C}(\text{O})\text{CH}_3$ ), 1.97-1.84 (m, 4H,  $\text{CH}_2$ ).  $^{13}\text{C}$  NMR (125 MHz,  $[\text{D}_6]$ DMSO):  $\delta$  168.9, 167.8, 151.3, 147.9, 141.3, 135.7, 127.0, 116.9, 115.7, 71.06, 71.03, 57.90, 57.89, 32.8, 30.8, 29.4, 28.0, 24.8. HRMS (ESI):  $m/z$   $[\text{M}+\text{H}]^+$  calcd for  $\text{C}_{20}\text{D}_2\text{H}_{25}\text{N}_2\text{O}_5$ : 376.1977; found: 376.1977.

### 8-acetamido-5,7-dideuterio-4,6-bis(3-methoxypropyl)quinoline-2-carboxylic acid (1c)

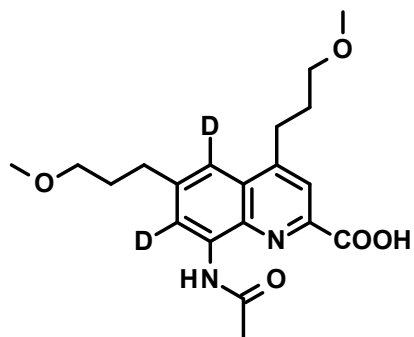

Using **General Procedure 6** and 170 mg **methyl 8-acetamido-5,7-dideuterio-4,6-bis(3-methoxypropyl)quinoline-2-carboxylate** (0.436 mmol, 1.0 equiv.), 130 mg **8-acetamido-5,7-dideuterio-4,6-bis(3-methoxypropyl)quinoline-2-carboxylic acid** was obtained as a yellow oil (0.339 mmol, 78%).

HPLC-UV purity: 98.2%.

$^1\text{H}$  NMR (500 MHz,  $[\text{D}_6]$ DMSO):  $\delta$  13.28 (br s, 1H, COOH), 10.47 (s, 1H, NH), 8.04 (s, 1H, Ar-H), 3.39 (t,  $J = 6.3$  Hz, 2H,  $\text{CH}_2$ ), 3.37 (t,  $J = 6.3$  Hz, 2H,  $\text{CH}_2$ ), 3.26 (s, 3H,  $\text{OCH}_3$ ), 3.25 (s, 3H,  $\text{OCH}_3$ ), 3.17 (t,  $J = 7.6$  Hz, 2H,  $\text{CH}_2$ ), 2.83 (t,  $J = 7.6$  Hz, 2H,  $\text{CH}_2$ ), 2.32 (s, 3H,  $\text{C}(\text{O})\text{CH}_3$ ), 1.97-1.84 (m, 4H,  $\text{CH}_2$ ).  $^{13}\text{C}$  NMR (125 MHz,  $[\text{D}_6]$ DMSO):  $\delta$  169.2, 165.5, 150.1, 144.1, 143.2, 135.9, 135.6, 128.2, 120.1, 70.98, 70.96, 57.92, 57.90, 32.7, 30.7, 29.4, 28.2, 24.8. HRMS (ESI):  $m/z$   $[\text{M}+\text{H}]^+$  calcd for  $\text{C}_{20}\text{D}_2\text{H}_{24}\text{N}_2\text{O}_5$ : 377.2040; found: 377.2042.

### 8-acetamido-3,5,7-trideuterio-4,6-bis(3-methoxypropyl)quinoline-2-carboxylic acid (1d)

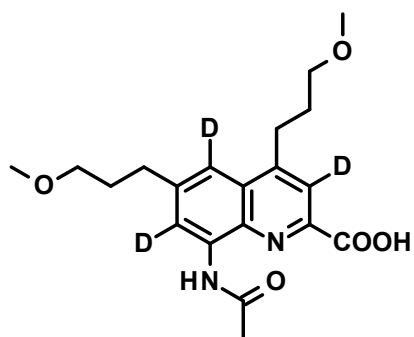

Using **General Procedure 6** and 165 mg **methyl 8-acetamido-3,5,7-trideuterio-4,6-bis(3-methoxypropyl)quinoline-2-carboxylate** (63% purity, 0.266 mmol, 1.0 equiv.), 31 mg **8-acetamido-3,5,7-trideuterio-4,6-bis(3-methoxypropyl)quinoline-2-carboxylic acid** was obtained as a yellow oil (0.082 mmol, 31%).

HPLC-UV purity: 99.6%.

$^1\text{H}$  NMR (500 MHz,  $[\text{D}_6]$ DMSO):  $\delta$  13.27 (br s, 1H, COOH), 10.47 (s, 1H, NH), 3.39 (t,  $J = 6.3$  Hz, 2H,  $\text{CH}_2$ ), 3.37 (t,  $J = 6.3$  Hz, 2H,  $\text{CH}_2$ ), 3.26 (s, 3H,  $\text{OCH}_3$ ), 3.25 (s, 3H,  $\text{OCH}_3$ ), 3.16 (t,  $J = 7.6$  Hz, 2H,  $\text{CH}_2$ ), 2.83 (t,  $J = 7.6$  Hz, 2H,  $\text{CH}_2$ ), 2.32 (s, 3H,  $\text{C}(\text{O})\text{CH}_3$ ), 1.97-1.84 (m, 4H,  $\text{CH}_2$ ).  $^{13}\text{C}$  NMR (125 MHz,  $[\text{D}_6]$ DMSO):  $\delta$  169.2, 165.6, 150.0, 144.2, 143.2, 135.9, 135.6, 128.2, 70.98, 70.97, 57.92, 57.90, 32.7, 30.7, 29.3, 28.2, 24.8. HRMS (ESI):  $m/z$   $[\text{M}+\text{H}]^+$  calcd for  $\text{C}_{20}\text{D}_3\text{H}_{23}\text{N}_2\text{O}_5$ : 378.2103; found: 378.2106.

#### 4,6-bis(3-methoxypropyl)-8-[(2,2,2-trideuterioacetyl)amino]quinoline-2-carboxylic acid (1d\*)

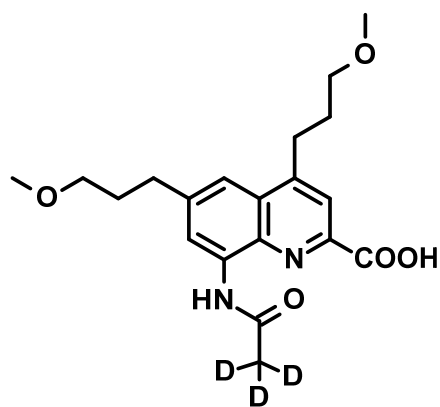

Using **General Procedure 6** and 338 mg **methyl 4,6-bis(3-methoxypropyl)-8-[(2,2,2-trideuterioacetyl)amino]quinoline-2-carboxylate** (74% purity, 0.639 mmol, 1.0 equiv.), 242 mg **4,6-bis(3-methoxypropyl)-8-[(2,2,2-trideuterioacetyl)amino]quinoline-2-carboxylic acid** was obtained as a yellow oil (0.616 mmol, 96%).

HPLC-UV purity: 96.4%.

$^1\text{H}$  NMR (500 MHz,  $[\text{D}_6]\text{DMSO}$ ):  $\delta$  10.50 (s, 1H, NH), 8.64 (s, 1H, Ar-H), 7.96 (s, 1H, Ar-H), 7.59 (d,  $J = 1.2$  Hz, 1H, Ar-H), 3.38 (t,  $J = 6.1$  Hz, 2H,  $\text{CH}_2$ ), 3.37 (t,  $J = 6.1$  Hz, 2H,  $\text{CH}_2$ ), 3.26 (s, 3H,  $\text{OCH}_3$ ), 3.25 (s, 3H,  $\text{OCH}_3$ ), 3.11 (t,  $J = 7.8$  Hz, 2H,  $\text{CH}_2$ ), 2.83 (t,  $J = 7.6$  Hz, 2H,  $\text{CH}_2$ ), 1.94-1.85 (m, 4H,  $\text{CH}_2$ ).  $^{13}\text{C}$

NMR (125 MHz,  $[\text{D}_6]\text{DMSO}$ ):  $\delta$  169.1, 166.8, 149.0, 142.4, 135.9, 135.6, 127.6, 120.6, 117.6, 115.8, 71.0, 57.88, 57.86, 32.8, 30.8, 29.4, 28.1, 24.8. HRMS (ESI):  $m/z$   $[\text{M}+\text{H}]^+$  calcd for  $\text{C}_{20}\text{D}_3\text{H}_{23}\text{N}_2\text{O}_5$ : 378.2103; found: 378.2111.

#### 3-deuterio-4,6-bis(3-methoxypropyl)-8-[(2,2,2-trideuterioacetyl)amino]quinoline-2-carboxylic acid (1e)

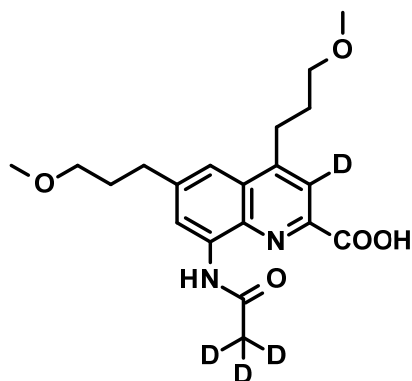

Using **General Procedure 6** and 246 mg (65% purity, 0.408 mmol, 1.0 equiv.) **methyl 3-deuterio-4,6-bis(3-methoxypropyl)-8-[(2,2,2-trideuterioacetyl)amino]quinoline-2-carboxylate**, 49 mg **3-deuterio-4,6-bis(3-methoxypropyl)-8-[(2,2,2-trideuterioacetyl)amino]quinoline-2-carboxylic acid** was obtained as a yellow oil (0.130 mmol, 32%).

HPLC-UV purity: 99.4%.

$^1\text{H}$  NMR (500 MHz,  $[\text{D}_6]\text{DMSO}$ ):  $\delta$  10.51 (s, 1H, NH), 8.67 (d,  $J = 1.4$  Hz, 1H, Ar-H), 7.62 (d,  $J = 1.4$  Hz, 1H, Ar-H), 3.39 (t,  $J = 6.3$  Hz, 2H,  $\text{CH}_2$ ), 3.37 (t,  $J = 6.3$  Hz, 2H,  $\text{CH}_2$ ), 3.25 (s, 6H,  $\text{OCH}_3$ ), 3.07 (t,  $J = 7.6$  Hz, 2H,  $\text{CH}_2$ ), 2.83 (t,  $J = 7.6$  Hz, 2H,  $\text{CH}_2$ ), 1.97-1.84 (m, 4H,  $\text{CH}_2$ ).  $^{13}\text{C}$  NMR (125 MHz,  $[\text{D}_6]\text{DMSO}$ ):  $\delta$  169.3,

166.0, 149.6, 145.4, 143.0, 136.0, 135.6, 128.0, 118.0, 115.9, 70.99, 70.98, 57.91, 57.90, 32.8, 30.8, 29.3, 28.1. HRMS (ESI):  $m/z$   $[\text{M}+\text{H}]^+$  calcd for  $\text{C}_{20}\text{D}_4\text{H}_{22}\text{N}_2\text{O}_5$ : 379.2166; found: 379.2166.

#### 5,7-dideuterio-4,6-bis(3-methoxypropyl)-8-[(2,2,2-trideuterioacetyl)amino]quinoline-2-carboxylic acid (1f)

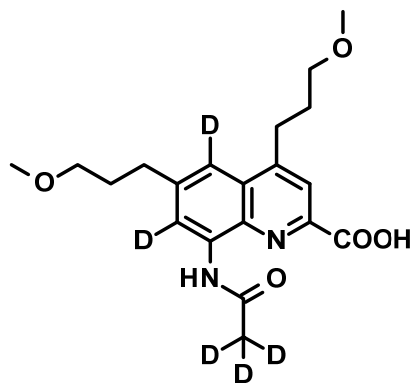

Using **General Procedure 6** and 232 mg **methyl 5,7-dideuterio-4,6-bis(3-methoxypropyl)-8-[(2,2,2-trideuterioacetyl)amino]quinoline-2-carboxylate** (87% purity, 0.512 mmol, 1.0 equiv.), 89 mg **5,7-dideuterio-4,6-bis(3-methoxypropyl)-8-[(2,2,2-trideuterioacetyl)amino]quinoline-2-carboxylic acid** was obtained as a yellow oil (99.9% purity, 0.235 mmol, 46%).

HPLC-UV purity: 99.9%.

$^1\text{H}$  NMR (500 MHz,  $[\text{D}_6]\text{DMSO}$ ):  $\delta$  10.50 (s, 1H, NH), 7.98 (s, 1H, Ar-H), 3.39 (t,  $J = 6.3$  Hz, 2H,  $\text{CH}_2$ ), 3.37 (t,  $J = 6.3$  Hz, 2H,  $\text{CH}_2$ ), 3.25 (br s, 6H,  $\text{OCH}_3$ ), 3.13 (t,  $J = 7.6$  Hz, 2H,  $\text{CH}_2$ ), 2.82 (t,  $J = 7.6$  Hz, 2H,  $\text{CH}_2$ ), 1.97-1.84 (m, 4H,  $\text{CH}_2$ ).  $^{13}\text{C}$

NMR (125 MHz,  $[\text{D}_6]\text{DMSO}$ ):  $\delta$  169.3, 166.2, 149.5, 145.9, 142.7, 135.9, 135.6, 127.9, 120.3, 71.00, 70.99, 57.92, 57.90, 32.7, 30.7, 29.4, 28.2. HRMS (ESI):  $m/z$   $[\text{M}+\text{H}]^+$  calcd for  $\text{C}_{20}\text{D}_5\text{H}_{21}\text{N}_2\text{O}_5$ : 380.2228; found: 380.2228.



### 8-acetamido-4,6-bis[3-(trideuteriomethoxy)propyl]quinoline-2-carboxylic acid (1g)

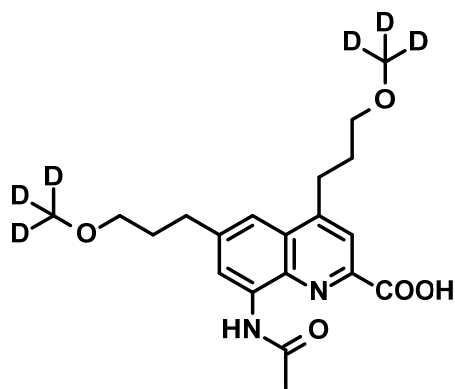

Using **General Procedure 6** and 296 mg methyl 8-acetamido-4,6-bis[3-(trideuteriomethoxy)propyl]quinoline-2-carboxylate (92% purity, 0.691 mmol, 1.0 equiv.), 93 mg 8-acetamido-4,6-bis[3-(trideuteriomethoxy)propyl]quinoline-2-carboxylic acid was obtained as a yellow oil (98.2% purity, 0.244 mmol, 35%).

HPLC-UV purity: 98.2%.

<sup>1</sup>H NMR (500 MHz, [D<sub>6</sub>]DMSO): δ 10.47 (s, 1H, NH), 8.63 (s, 1H, Ar-H), 7.95 (s, 1H, Ar-H), 7.59 (s, 1H, Ar-H), 3.38 (t, *J* = 6.3 Hz, 2H, CH<sub>2</sub>), 3.36 (t, *J* = 6.3 Hz, 2H, CH<sub>2</sub>), 3.11 (t, *J* = 7.2 Hz, 2H, CH<sub>2</sub>), 2.81 (t, *J* = 7.2 Hz, 2H, CH<sub>2</sub>), 2.30 (s, 3H, C(O)CH<sub>3</sub>), 1.97-1.84 (m, 4H, CH<sub>2</sub>). <sup>13</sup>C NMR (125 MHz, [D<sub>6</sub>]DMSO): δ 169.1, 166.8, 149.0, 142.3, 135.9, 135.7, 127.6, 120.6, 117.6, 115.8, 70.90, 70.89, 32.8, 30.8, 29.4, 28.2, 24.8. HRMS (ESI): *m/z* [M+H]<sup>+</sup> calcd for C<sub>20</sub>D<sub>6</sub>H<sub>20</sub>N<sub>2</sub>O<sub>5</sub>: 381.2291; found: 381.2292.

### 8-acetamido-3-deuterio-4,6-bis[3-(trideuteriomethoxy)propyl]quinoline-2-carboxylic acid (1h)

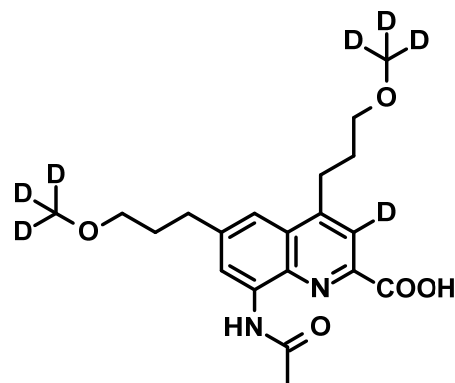

Using **General Procedure 6** and 260 mg methyl 8-acetamido-3-deuterio-4,6-bis[3-(trideuteriomethoxy)propyl]quinoline-2-carboxylate (90% purity, 0.661 mmol, 1.0 equiv.), 65 mg 8-acetamido-3-deuterio-4,6-bis[3-(trideuteriomethoxy)propyl]quinoline-2-carboxylic acid was obtained as a yellow oil (99.3% purity, 0.170 mmol, 26%).

HPLC-UV purity: 99.3%.

<sup>1</sup>H NMR (500 MHz, [D<sub>6</sub>]DMSO): δ 10.47 (s, 1H, NH), 8.73 (d, *J* = 1.3 Hz, 1H, Ar-H), 7.62 (d, *J* = 1.3 Hz, 1H, Ar-H), 3.38 (t, *J* = 6.3 Hz, 2H, CH<sub>2</sub>), 3.37 (t, *J* = 6.3 Hz, 2H, CH<sub>2</sub>), 3.14 (t, *J* = 7.2 Hz, 2H, CH<sub>2</sub>), 2.82 (t, *J* = 7.2 Hz, 2H, CH<sub>2</sub>), 2.31 (s, 3H, C(O)CH<sub>3</sub>), 1.97-1.84 (m, 4H, CH<sub>2</sub>). <sup>13</sup>C NMR (125 MHz, [D<sub>6</sub>]DMSO): δ 169.2, 166.3, 149.3, 142.7, 136.0, 135.6, 127.9, 117.8, 115.9, 70.89, 70.87, 32.8, 30.8, 29.4, 28.1, 24.8. HRMS (ESI): *m/z* [M+H]<sup>+</sup> calcd for C<sub>20</sub>D<sub>7</sub>H<sub>19</sub>N<sub>2</sub>O<sub>5</sub>: 382.2354; found: 382.2355.

### 8-acetamido-5,7-dideuterio-4,6-bis[3-(trideuteriomethoxy)propyl]quinoline-2-carboxylic acid (1i)

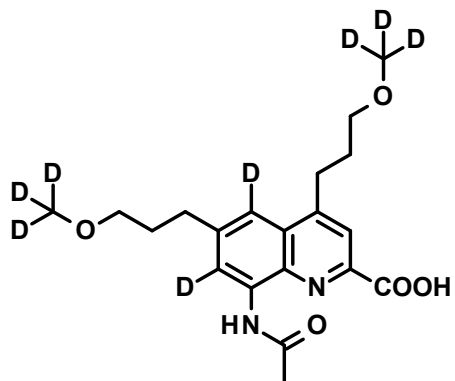

Using **General Procedure 6** and 250 mg methyl 8-acetamido-5,7-dideuterio-4,6-bis[3-(trideuteriomethoxy)propyl]quinoline-2-carboxylate (87% purity, 0.548 mmol, 1.0 equiv.), 60 mg 8-acetamido-5,7-dideuterio-4,6-bis[3-(trideuteriomethoxy)propyl]quinoline-2-carboxylic acid was obtained as a yellow oil (98.2% purity, 0.154 mmol, 28%).

HPLC-UV purity: 98.2%.

$^1\text{H}$  NMR (500 MHz,  $[\text{D}_6]\text{DMSO}$ ):  $\delta$  10.49 (s, 1H, NH), 8.00 (s, 1H, Ar-H), 3.39 (t,  $J = 6.3$  Hz, 2H,  $\text{CH}_2$ ), 3.36 (t,  $J = 6.3$  Hz, 2H,  $\text{CH}_2$ ), 3.14 (t,  $J = 7.2$  Hz, 2H,  $\text{CH}_2$ ), 2.82 (t,  $J = 7.2$  Hz, 2H,  $\text{CH}_2$ ), 2.31 (s, 3H,  $\text{C}(\text{O})\text{CH}_3$ ), 1.97-1.84 (m, 4H,  $\text{CH}_2$ ).  $^{13}\text{C}$  NMR (125 MHz,  $[\text{D}_6]\text{DMSO}$ ):  $\delta$  169.2, 166.0, 149.6, 142.8, 135.9, 135.6, 128.0, 120.3, 70.88, 70.87, 32.7, 30.7, 29.4, 28.2, 24.8. HRMS (ESI):  $m/z$   $[\text{M}+\text{H}]^+$  calcd for  $\text{C}_{20}\text{D}_8\text{H}_{18}\text{N}_2\text{O}_5$ : 383.2417; found: 383.2418.

#### 8-acetamido-4,6-bis(1,1,2,2-tetradeuterio-3-methoxy-propyl)quinoline-2-carboxylic acid (1i\*)

Using **General Procedure 6** and 268 mg methyl 8-acetamido-4,6-bis(1,1,2,2-tetradeuterio-3-methoxy-propyl)quinoline-2-carboxylate (94% purity, 0.712 mmol, 1.0 equiv.), 53 mg 8-acetamido-4,6-bis(1,1,2,2-tetradeuterio-3-methoxy-propyl)quinoline-2-carboxylic acid was obtained as a yellow oil (0.139 mmol, 19%).

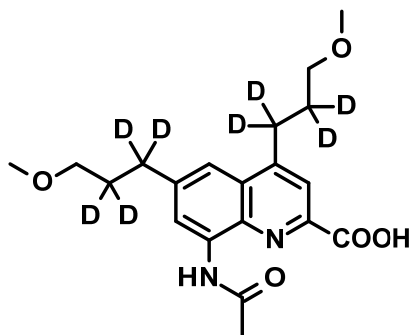

HPLC-UV purity: 99.6%.

$^1\text{H}$  NMR (500 MHz,  $[\text{D}_6]\text{DMSO}$ ):  $\delta$  10.47 (s, 1H, NH), 8.59 (d,  $J = 1.4$  Hz, 1H, Ar-H), 7.90 (s, 1H, Ar-H), 7.56 (d,  $J = 1.4$  Hz, 1H, Ar-H), 3.36 (s, 2H,  $\text{CH}_2$ ), 3.35 (s, 2H,  $\text{CH}_2$ ), 3.252 (s, 3H,  $\text{OCH}_3$ ), 3.251 (s, 3H,  $\text{OCH}_3$ ), 2.29 (s, 3H,  $\text{C}(\text{O})\text{CH}_3$ ).  $^{13}\text{C}$  NMR (125 MHz,  $[\text{D}_6]\text{DMSO}$ ):  $\delta$  169.0, 167.3, 148.4, 141.7, 135.8, 135.7, 127.3,

120.9, 117.2, 115.7, 70.90, 70.89, 57.92, 57.90, 24.8. HRMS (ESI):  $m/z$   $[\text{M}+\text{H}]^+$  calcd for  $\text{C}_{20}\text{D}_8\text{H}_{18}\text{N}_2\text{O}_5$ : 383.2417; found: 383.2414.

#### 8-[(2,2,2-trideuterioacetyl)amino]-4,6-bis[3-(trideuteriomethoxy)propyl]quinoline-2-carboxylic acid (1j)

Using **General Procedure 6** and 185 mg methyl 8-[(2,2,2-trideuterioacetyl)amino]-4,6-bis[3-(trideuteriomethoxy)propyl]quinoline-2-carboxylate (92% purity, 0.423 mmol, 1.0 equiv.), 41 mg 8-[(2,2,2-trideuterioacetyl)amino]-4,6-bis[3-(trideuteriomethoxy)propyl]quinoline-2-carboxylic acid was obtained as a yellow oil (94.9% purity, 0.102 mmol, 24%).

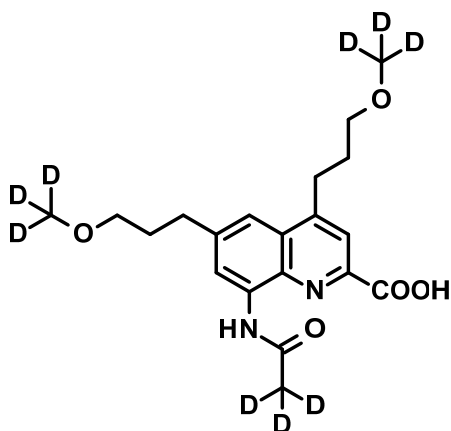

HPLC-UV purity: 94.9%.

$^1\text{H}$  NMR (500 MHz,  $[\text{D}_6]\text{DMSO}$ ):  $\delta$  10.49 (s, 1H, NH), 8.68 (d,  $J = 1.1$  Hz, 1H, Ar-H), 8.00 (s, 1H, Ar-H), 7.63 (d,  $J = 1.1$  Hz, 1H, Ar-H), 3.39 (t,  $J = 6.3$  Hz, 2H,  $\text{CH}_2$ ), 3.36 (t,  $J = 6.3$  Hz, 2H,  $\text{CH}_2$ ), 3.14 (t,  $J = 7.2$  Hz, 2H,  $\text{CH}_2$ ), 2.83 (t,

$J = 7.2$  Hz, 2H,  $\text{CH}_2$ ), 1.97-1.84 (m, 4H,  $\text{CH}_2$ ).  $^{13}\text{C}$  NMR (125 MHz,  $[\text{D}_6]\text{DMSO}$ ):  $\delta$  169.3, 166.0, 149.7, 143.0, 136.0, 135.6, 128.0, 120.3, 118.0, 115.9, 70.89, 70.87, 32.8, 30.8, 29.4, 28.2. HRMS (ESI):  $m/z$   $[\text{M}+\text{H}]^+$  calcd for  $\text{C}_{20}\text{D}_9\text{H}_{17}\text{N}_2\text{O}_5$ : 384.2479; found: 384.2483.

**3-deuterio-8-[(2,2,2-trideuterioacetyl)amino]-4,6-bis[3-(trideuteriomethoxy)propyl]quinoline-2-carboxylic acid (1k)**

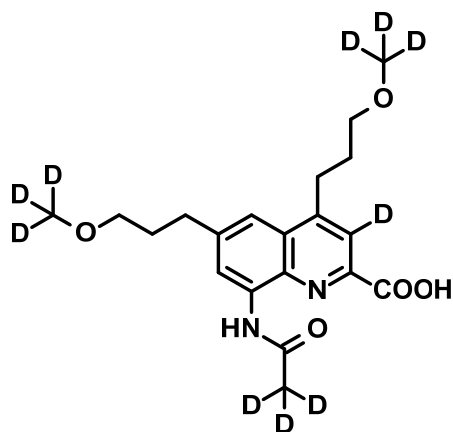

Using **General Procedure 6** and 200 mg methyl 3-deuterio-8-[(2,2,2-trideuterioacetyl)amino]-4,6-bis[3-(trideuteriomethoxy)propyl]quinoline-2-carboxylate (82% purity, 0.412 mmol, 1.0 equiv.), 119 mg 3-deuterio-8-[(2,2,2-trideuterioacetyl)amino]-4,6-bis[3-(trideuteriomethoxy)propyl]quinoline-2-carboxylic acid was obtained as a yellow oil (97.2% purity, 0.300 mmol, 73%).

HPLC-UV purity: 97.2%.

$^1\text{H}$  NMR (500 MHz,  $[\text{D}_6]$ DMSO):  $\delta$  10.48 (s, 1H, NH), 8.63 (d,  $J = 1.3$  Hz, 1H, Ar-H), 7.59 (d,  $J = 1.3$  Hz, 1H, Ar-H), 3.38 (t,  $J = 6.3$  Hz, 2H,  $\text{CH}_2$ ), 3.36 (t,  $J = 6.3$  Hz, 2H,  $\text{CH}_2$ ), 3.11 (t,  $J = 7.2$  Hz, 2H,  $\text{CH}_2$ ), 2.82 (t,  $J = 7.2$  Hz, 2H,  $\text{CH}_2$ ),

1.97-1.84 (m, 4H,  $\text{CH}_2$ ).  $^{13}\text{C}$  NMR (125 MHz,  $[\text{D}_6]$ DMSO):  $\delta$  169.2, 166.8, 148.9, 147.7, 142.3, 135.9, 135.7, 127.6, 117.5, 115.8, 70.90, 70.89, 32.8, 30.8, 29.4, 28.1. HRMS (ESI):  $m/z$   $[\text{M}+\text{H}]^+$  calcd for  $\text{C}_{20}\text{D}_{10}\text{H}_{16}\text{N}_2\text{O}_5$ : 385.2542; found: 384.2483.

**5,7-dideuterio-8-[(2,2,2-trideuterioacetyl)amino]-4,6-bis[3-(trideuteriomethoxy)propyl]quinoline-2-carboxylic acid (1l)**

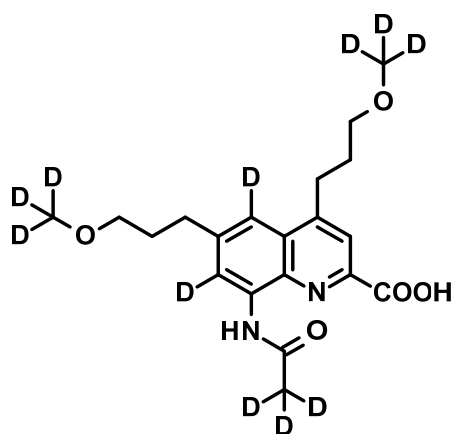

Using **General Procedure 6** and 170 mg methyl 5,7-dideuterio-8-[(2,2,2-trideuterioacetyl)amino]-4,6-bis[3-(trideuteriomethoxy)propyl]quinoline-2-carboxylate (77% purity, 0.328 mmol, 1.0 equiv.), 45 mg 5,7-dideuterio-8-[(2,2,2-trideuterioacetyl)amino]-4,6-bis[3-(trideuteriomethoxy)propyl]quinoline-2-carboxylic acid was obtained as a yellow oil (93.3% purity, 0.109 mmol, 33%).

HPLC-UV purity: 93.3%.

$^1\text{H}$  NMR (500 MHz,  $[\text{D}_6]$ DMSO):  $\delta$  10.47 (s, 1H, NH), 7.97 (s, 1H, Ar-H), 3.39 (t,  $J = 6.3$  Hz, 2H,  $\text{CH}_2$ ), 3.36 (t,  $J = 6.3$  Hz, 2H,  $\text{CH}_2$ ), 3.13 (t,  $J = 7.2$  Hz, 2H,  $\text{CH}_2$ ), 2.82 (t,  $J = 7.2$  Hz, 2H,  $\text{CH}_2$ ), 1.97-1.84 (m, 4H,  $\text{CH}_2$ ).  $^{13}\text{C}$  NMR (125

MHz,  $[\text{D}_6]$ DMSO):  $\delta$  169.2, 166.6, 149.1, 147.1, 142.4, 135.9, 135.7, 127.7, 120.5, 70.90, 70.89, 32.7, 30.8, 29.4, 28.2. HRMS (ESI):  $m/z$   $[\text{M}+\text{H}]^+$  calcd for  $\text{C}_{20}\text{D}_{11}\text{H}_{15}\text{N}_2\text{O}_5$ : 386.2605; found: 386.2606.

**3-deuterio-4,6-bis(1,1,2,2-tetradeuterio-3-methoxy-propyl)-8-[(2,2,2-trideuterioacetyl)amino]quinoline-2-carboxylic acid (1m)**

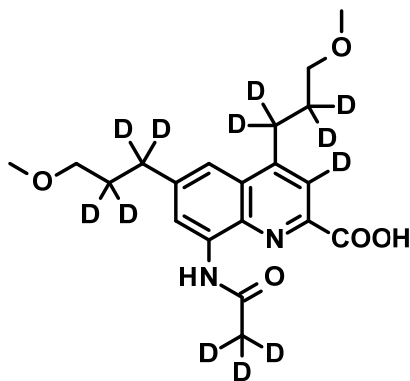

Using **General Procedure 6** and 160 mg **methyl 3-deuterio-4,6-bis(1,1,2,2-tetradeuterio-3-methoxy-propyl)-8-[(2,2,2-trideuterioacetyl)amino]quinoline-2-carboxylate** (81% purity, 0.324 mmol, 1.0 equiv.), 57 mg **3-deuterio-4,6-bis(1,1,2,2-tetradeuterio-3-methoxy-propyl)-8-[(2,2,2-trideuterioacetyl)amino]quinoline-2-carboxylic acid** was obtained as a yellow oil (96.2% purity, 0.142 mmol, 33%).

HPLC-UV purity: 96.2%.

$^1\text{H}$  NMR (500 MHz,  $[\text{D}_6]\text{DMSO}$ ):  $\delta$  10.46 (s, 1H, NH), 8.64 (d,  $J = 1.7$  Hz, 1H, Ar-H), 7.59 (d,  $J = 1.7$  Hz, 1H, Ar-H), 3.37 (s, 2H,  $\text{CH}_2$ ), 3.35 (s, 2H,  $\text{CH}_2$ ), 3.25 (br s, 6H,  $\text{OCH}_3$ ).  $^{13}\text{C}$  NMR (125 MHz,  $[\text{D}_6]\text{DMSO}$ ):  $\delta$  169.2, 166.5, 149.1, 142.5, 135.9, 135.6, 127.8, 117.7, 115.8, 70.87, 70.86, 57.92, 57.91. HRMS (ESI):  $m/z$   $[\text{M}+\text{H}]^+$  calcd for  $\text{C}_{20}\text{D}_{12}\text{H}_{14}\text{N}_2\text{O}_5$ : 387.2668; found: 387.2666.

**5,7-dideuterio-4,6-bis(1,1,2,2-tetradeuterio-3-methoxy-propyl)-8-[(2,2,2-trideuterioacetyl)amino]quinoline-2-carboxylic acid (1n)**

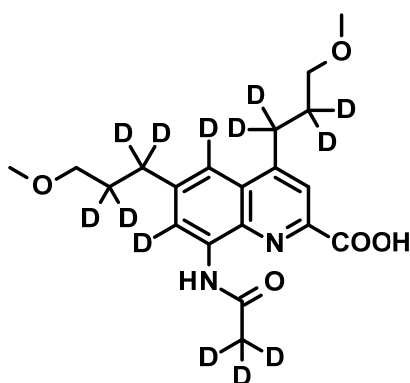

Using **General Procedure 6** and 170 mg **methyl 5,7-dideuterio-4,6-bis(1,1,2,2-tetradeuterio-3-methoxy-propyl)-8-[(2,2,2-trideuterioacetyl)amino]quinoline-2-carboxylate** (70% purity, 0.296 mmol, 1.0 equiv.), 53 mg **5,7-dideuterio-4,6-bis(1,1,2,2-tetradeuterio-3-methoxy-propyl)-8-[(2,2,2-trideuterioacetyl)amino]quinoline-2-carboxylic acid** was obtained as a yellow oil (93.9% purity, 0.129 mmol, 43%).

HPLC-UV purity: 93.9%.

$^1\text{H}$  NMR (500 MHz,  $[\text{D}_6]\text{DMSO}$ ):  $\delta$  10.50 (s, 1H, NH), 7.97 (s, 1H, Ar-H), 3.37 (s, 2H,  $\text{CH}_2$ ), 3.35 (s, 2H,  $\text{CH}_2$ ), 3.25 (br s, 6H,  $\text{OCH}_3$ ).  $^{13}\text{C}$  NMR (125 MHz,  $[\text{D}_6]\text{DMSO}$ ):  $\delta$  169.2, 166.3, 149.3, 146.3, 142.5, 135.9, 135.6, 127.8, 120.4, 70.87, 70.86, 57.93, 57.91. HRMS (ESI):  $m/z$   $[\text{M}+\text{H}]^+$  calcd for  $\text{C}_{20}\text{D}_{13}\text{H}_{13}\text{N}_2\text{O}_5$ : 388.2730; found: 388.2731.

**8-acetamido-4,6-bis[1,1,2,2-tetradeuterio-3-(trideuteriomethoxy)propyl]quinoline-2-carboxylic acid (1o)**

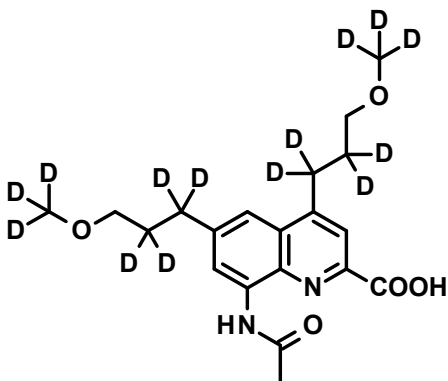

Using **General Procedure 6** and 200 mg **methyl 8-acetamido-4,6-bis[1,1,2,2-tetradeuterio-3-(trideuteriomethoxy)propyl]quinoline-2-carboxylate** (87% purity, 0.432 mmol, 1.0 equiv.), 51 mg **8-acetamido-4,6-bis[1,1,2,2-tetradeuterio-3-(trideuteriomethoxy)propyl]quinoline-2-carboxylic acid** was obtained as a yellow oil (99.7% purity, 0.131 mmol, 47%).

HPLC-UV purity: 99.7%.

$^1\text{H}$  NMR (500 MHz,  $[\text{D}_6]\text{DMSO}$ ):  $\delta$  13.36 (br s, 1H, COOH), 10.48 (s, 1H, NH), 8.70 (d,  $J = 1.7$  Hz, 1H, Ar-H), 8.02 (s, 1H, Ar-H), 7.64 (d,  $J = 1.7$  Hz, 1H, Ar-H), 3.37 (s, 2H,  $\text{CH}_2$ ), 3.35 (s, 2H,  $\text{CH}_2$ ), 2.32 (s, 3H,  $\text{C}(\text{O})\text{CH}_3$ ).  $^{13}\text{C}$  NMR (125 MHz,  $[\text{D}_6]\text{DMSO}$ ):  $\delta$  169.3, 165.6, 150.0, 144.4, 143.2, 136.0, 135.6, 128.3, 120.2, 118.2, 116.0, 70.73, 70.72, 24.8. HRMS (ESI):  $m/z$   $[\text{M}+\text{H}]^+$  calcd for  $\text{C}_{20}\text{D}_{14}\text{H}_{12}\text{N}_2\text{O}_5$ : 389.2793; found: 389.2972.

**8-acetamido-3-deuterio-4,6-bis[1,1,2,2-tetradeuterio-3-(trideuteriomethoxy)propyl]quinoline-2-carboxylic acid (1p)**

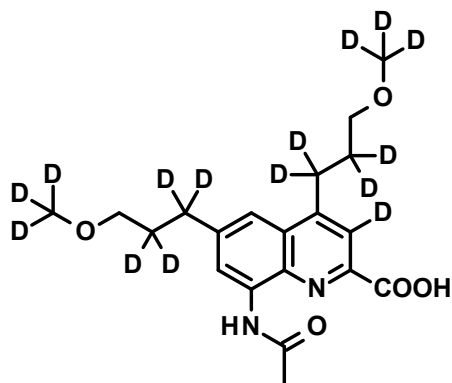

Using **General Procedure 6** and 195 mg **methyl 8-acetamido-3-deuterio-4,6-bis[1,1,2,2-tetradeuterio-3-(trideuteriomethoxy)propyl]quinoline-2-carboxylate** (65% purity, 0.314 mmol, 1.0 equiv.), 66 mg **8-acetamido-3-deuterio-4,6-bis[1,1,2,2-tetradeuterio-3-(trideuteriomethoxy)propyl]quinoline-2-carboxylic acid** was obtained as a yellow oil (99.5% purity, 0.169 mmol, 54%).

HPLC-UV purity: 99.5%.

$^1\text{H}$  NMR (500 MHz,  $[\text{D}_6]\text{DMSO}$ ):  $\delta$  13.32 (br s, 1H, COOH), 10.47 (s, 1H, NH), 8.70 (d,  $J = 1.6$  Hz, 1H, Ar-H), 7.64 (d,  $J = 1.6$  Hz, 1H, Ar-H), 3.38 (s, 2H,  $\text{CH}_2$ ),

3.35 (s, 2H,  $\text{CH}_2$ ), 2.32 (s, 3H,  $\text{C}(\text{O})\text{CH}_3$ ).  $^{13}\text{C}$  NMR (125 MHz,  $[\text{D}_6]\text{DMSO}$ ):  $\delta$  169.3, 165.6, 150.0, 144.2, 143.3, 136.0, 135.6, 128.3, 118.2, 116.0, 70.73, 70.72, 24.8. HRMS (ESI):  $m/z$   $[\text{M}+\text{H}]^+$  calcd for  $\text{C}_{20}\text{D}_{15}\text{H}_{11}\text{N}_2\text{O}_5$ : 390.2856; found: 390.2856.

**8-acetamido-5,7-dideuterio-4,6-bis[1,1,2,2-tetradeuterio-3-(trideuteriomethoxy)propyl]quinoline-2-carboxylic acid (1q)**

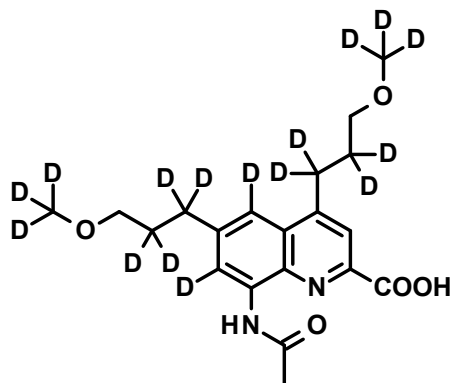

Using **General Procedure 6** and 180 mg **methyl 8-acetamido-5,7-dideuterio-4,6-bis[1,1,2,2-tetradeuterio-3-(trideuteriomethoxy)propyl]quinoline-2-carboxylate** (74% purity, 0.329 mmol, 1.0 equiv.), 74 mg **8-acetamido-5,7-dideuterio-4,6-bis[1,1,2,2-tetradeuterio-3-(trideuteriomethoxy)propyl]quinoline-2-carboxylic acid** was obtained as a yellow oil (98.7% purity, 0.190 mmol, 58%).

HPLC-UV purity: 98.7%.

$^1\text{H}$  NMR (500 MHz,  $[\text{D}_6]\text{DMSO}$ ):  $\delta$  13.33 (br s, 1H, COOH), 10.47 (s, 1H, NH), 8.03 (s, 1H, Ar-H), 3.38 (s, 2H,  $\text{CH}_2$ ), 3.35 (s, 2H,  $\text{CH}_2$ ), 2.32 (s, 3H,  $\text{C}(\text{O})\text{CH}_3$ ).

$^{13}\text{C}$  NMR (125 MHz,  $[\text{D}_6]\text{DMSO}$ ):  $\delta$  169.2, 165.6, 150.1, 144.2, 143.1, 135.9, 135.6, 128.2, 120.2, 70.73, 70.72, 24.8. HRMS (ESI):  $m/z$   $[\text{M}+\text{H}]^+$  calcd for  $\text{C}_{20}\text{D}_{16}\text{H}_{10}\text{N}_2\text{O}_5$ : 391.2919; found: 391.2919.

**4,6-bis[1,1,2,2-tetradeuterio-3-(trideuteriomethoxy)propyl]-8-[(2,2,2-trideuterioacetyl)amino]quinoline-2-carboxylic acid (1r)**

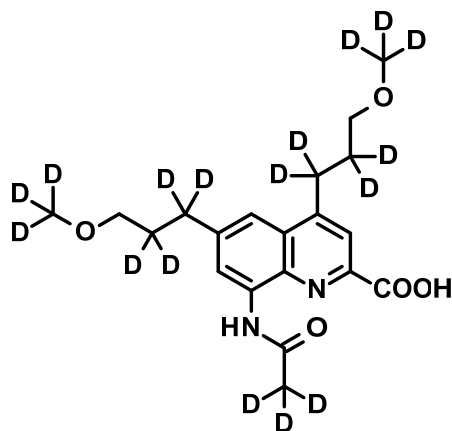

Using **General Procedure 6** and 90 mg **methyl 4,6-bis[1,1,2,2-tetradeuterio-3-(trideuteriomethoxy)propyl]-8-[(2,2,2-trideuterioacetyl)amino]quinoline-2-carboxylate** (89% purity, 0.198 mmol, 1.0 equiv.), 40 mg **4,6-bis[1,1,2,2-tetradeuterio-3-(trideuteriomethoxy)propyl]-8-[(2,2,2-trideuterioacetyl)amino]quinoline-2-carboxylic acid** was obtained as a yellow oil (99.8% purity, 0.102 mmol, 41%).

HPLC-UV purity: 99.8%.

$^1\text{H}$  NMR (500 MHz,  $[\text{D}_6]\text{DMSO}$ ):  $\delta$  10.51 (s, 1H, NH), 8.64 (d,  $J = 1.5$  Hz, 1H, Ar-H), 7.95 (s, 1H, Ar-H), 7.58 (d,  $J = 1.5$  Hz, 1H, Ar-H), 3.37 (s, 2H,  $\text{CH}_2$ ),

3.35 (s, 2H, CH<sub>2</sub>). <sup>13</sup>C NMR (125 MHz, [D<sub>6</sub>]DMSO): δ 169.2, 166.7, 149.0, 147.4, 142.4, 135.9, 135.7, 127.7, 120.6, 117.6, 115.8, 70.76, 70.75. HRMS (ESI): *m/z* [M+H]<sup>+</sup> calcd for C<sub>20</sub>D<sub>17</sub>H<sub>9</sub>N<sub>2</sub>O<sub>5</sub>: 392.2982; found: 392.2981.

**3-deuterio-4,6-bis[1,1,2,2-tetradeuterio-3-(trideuteriomethoxy)propyl]-8-[(2,2,2-trideuterioacetyl)amino]quinoline-2-carboxylic acid (1s)**

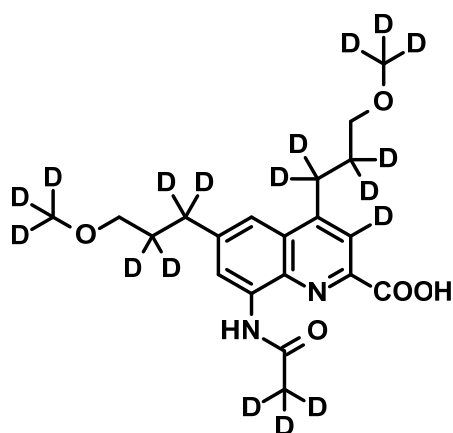

Using **General Procedure 6** and 90 mg methyl 3-deuterio-4,6-bis[1,1,2,2-tetradeuterio-3-(trideuteriomethoxy)propyl]-8-[(2,2,2-trideuterioacetyl)amino]quinoline-2-carboxylate (81% purity, 0.179 mmol, 1.0 equiv.), 34 mg 3-deuterio-4,6-bis[1,1,2,2-tetradeuterio-3-(trideuteriomethoxy)propyl]-8-[(2,2,2-trideuterioacetyl)amino]quinoline-2-carboxylic acid was obtained as a yellow oil (98.9% purity, 0.087 mmol, 48%).

HPLC-UV purity: 98.9%.

<sup>1</sup>H NMR (500 MHz, [D<sub>6</sub>]DMSO): δ 13.35 (br s, 1H, COOH), 10.47 (s, 1H, NH), 8.70 (d, *J* = 1.6 Hz, 1H, Ar-H), 7.63 (d, *J* = 1.6 Hz, 1H, Ar-H), 3.37 (s, 2H, CH<sub>2</sub>),

3.35 (s, 2H, CH<sub>2</sub>). <sup>13</sup>C NMR (125 MHz, [D<sub>6</sub>]DMSO): δ 169.3, 165.6, 149.9, 144.2, 143.3, 136.0, 135.6, 128.3, 118.2, 116.0, 70.73, 70.72. HRMS (ESI): *m/z* [M+H]<sup>+</sup> calcd for C<sub>20</sub>D<sub>18</sub>H<sub>8</sub>N<sub>2</sub>O<sub>5</sub>: 393.3044; found: 393.3044.

**5,7-dideuterio-4,6-bis[1,1,2,2-tetradeuterio-3-(trideuteriomethoxy)propyl]-8-[(2,2,2-trideuterioacetyl)amino]quinoline-2-carboxylic acid (1t)**

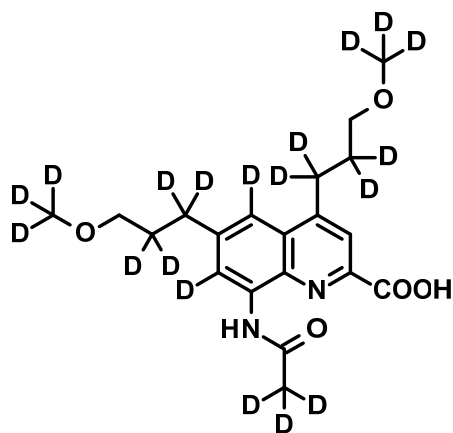

Using **General Procedure 6** and 170 mg methyl 5,7-dideuterio-4,6-bis[1,1,2,2-tetradeuterio-3-(trideuteriomethoxy)propyl]-8-[(2,2,2-trideuterioacetyl)amino]quinoline-2-carboxylate (70% purity, 0.292 mmol, 1.0 equiv.), 31 mg 5,7-dideuterio-4,6-bis[1,1,2,2-tetradeuterio-3-(trideuteriomethoxy)propyl]-8-[(2,2,2-trideuterioacetyl)amino]quinoline-2-carboxylic acid was obtained as a yellow oil (99.2% purity, 0.079 mmol, 27%).

HPLC-UV purity: 99.2%.

<sup>1</sup>H NMR (500 MHz, [D<sub>6</sub>]DMSO): δ 10.47 (s, 1H, NH), 8.04 (s, 1H, Ar-H), 3.38 (s, 2H, CH<sub>2</sub>), 3.35 (s, 2H, CH<sub>2</sub>). <sup>13</sup>C NMR (125 MHz, [D<sub>6</sub>]DMSO): δ 169.3,

166.2, 149.5, 145.9, 142.6, 135.9, 135.6, 127.9, 120.4, 70.75, 70.74. HRMS (ESI): *m/z* [M+H]<sup>+</sup> calcd for C<sub>20</sub>D<sub>19</sub>H<sub>7</sub>N<sub>2</sub>O<sub>5</sub>: 394.3107; found: 394.3107.

**3,5,7-trideuterio-4,6-bis[1,1,2,2-tetradeuterio-3-(trideuteriomethoxy)propyl]-8-[(2,2,2-trideuterioacetyl)amino]quinoline-2-carboxylic acid (1u)**

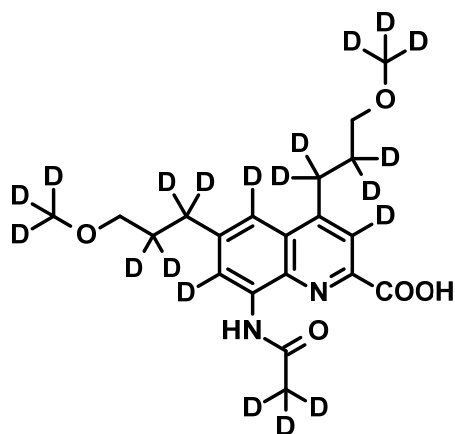

Using **General Procedure 6** and 90 mg **methyl 3,5,7-trideuterio-4,6-bis[1,1,2,2-tetradeuterio-3-(trideuteriomethoxy)propyl]-8-[(2,2,2-trideuterioacetyl)amino]quinoline-2-carboxylate** (92% purity, 0.203 mmol, 1.0 equiv.), 17 mg **3,5,7-trideuterio-4,6-bis[1,1,2,2-tetradeuterio-3-(trideuteriomethoxy)propyl]-8-[(2,2,2-trideuterioacetyl)amino]quinoline-2-carboxylic acid** was obtained as a yellow oil (95.9% purity, 0.041 mmol, 19%).

HPLC-UV purity: 95.9%.

$^1\text{H}$  NMR (500 MHz,  $[\text{D}_6]\text{DMSO}$ ):  $\delta$  10.49 (s, 1H, NH), 3.38 (s, 2H,  $\text{CH}_2$ ), 3.35 (s, 2H,  $\text{CH}_2$ ).  $^{13}\text{C}$  NMR (125 MHz,  $[\text{D}_6]\text{DMSO}$ ):  $\delta$  169.3, 165.8, 149.8, 144.7,

143.0, 135.9, 135.6, 128.1, 70.74, 70.72. HRMS (ESI):  $m/z$   $[\text{M}+\text{H}]^+$  calcd for  $\text{C}_{20}\text{D}_{20}\text{H}_6\text{N}_2\text{O}_5$ : 395.3170; found: 395.3171.

**4,6-bis[1,1,2,2,3,3-hexadeuterio-3-(trideuteriomethoxy)propyl]-8-[(2,2,2-trideuterioacetyl)amino]quinoline-2-carboxylic acid (1v)**

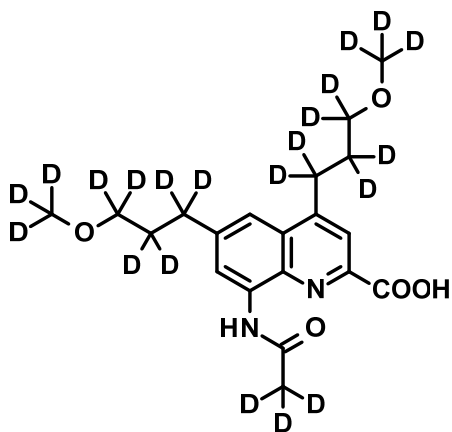

Using **General Procedure 6** and 190 mg **methyl 4,6-bis[1,1,2,2,3,3-hexadeuterio-3-(trideuteriomethoxy)propyl]-8-[(2,2,2-trideuterioacetyl)amino]quinoline-2-carboxylate** (63% purity, 0.292 mmol, 1.0 equiv.), 30 mg **4,6-bis[1,1,2,2,3,3-hexadeuterio-3-(trideuteriomethoxy)propyl]-8-[(2,2,2-trideuterioacetyl)amino]quinoline-2-carboxylic acid** was obtained as a yellow oil (98.9% purity, 0.075 mmol, 25%).

HPLC-UV purity: 98.9%.

$^1\text{H}$  NMR (500 MHz,  $[\text{D}_6]\text{DMSO}$ ):  $\delta$  10.52 (s, 1H, NH), 8.66 (d,  $J = 1.5$  Hz, 1H, Ar-H), 7.98 (s, 1H, Ar-H), 7.61 (d,  $J = 1.5$  Hz, 1H, Ar-H).  $^{13}\text{C}$  NMR (125 MHz,

$[\text{D}_6]\text{DMSO}$ ):  $\delta$  169.3, 166.2, 149.5, 145.9, 142.8, 136.0, 135.6, 128.0, 120.4, 117.9, 115.9. HRMS (ESI):  $m/z$   $[\text{M}+\text{H}]^+$  calcd for  $\text{C}_{20}\text{D}_{21}\text{H}_5\text{N}_2\text{O}_5$ : 396.3230; found: 396.3233.

**3-deuterio-4,6-bis[1,1,2,2,3,3-hexadeuterio-3-(trideuteriomethoxy)propyl]-8-[(2,2,2-trideuterioacetyl)amino]quinoline-2-carboxylic acid (1w)**

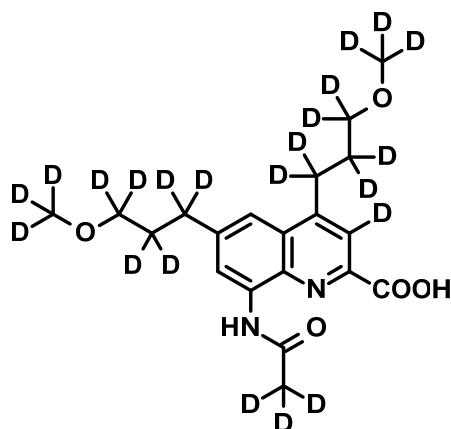

Using **General Procedure 6** and 250 mg **methyl 3-deuterio-4,6-bis[1,1,2,2,3,3-hexadeuterio-3-(trideuteriomethoxy)propyl]-8-[(2,2,2-trideuterioacetyl)amino]quinoline-2-carboxylate** (51% purity, 0.311 mmol, 1.0 equiv.), 30 mg **3-deuterio-4,6-bis[1,1,2,2,3,3-hexadeuterio-3-(trideuteriomethoxy)propyl]-8-[(2,2,2-trideuterioacetyl)amino]quinoline-2-carboxylic acid** was obtained as a yellow oil (95.2% purity, 0.072 mmol, 21%).

HPLC-UV purity: 95.2%.

$^1\text{H}$  NMR (500 MHz,  $[\text{D}_6]\text{DMSO}$ ):  $\delta$  10.53 (s, 1H, NH), 8.66 (d,  $J = 1.6$  Hz, 1H, Ar-H), 7.60 (d,  $J = 1.6$  Hz, 1H, Ar-H).  $^{13}\text{C}$  NMR (125 MHz,  $[\text{D}_6]\text{DMSO}$ ):  $\delta$

169.2, 166.3, 149.3, 146.2, 142.7, 136.0, 135.6, 127.9, 117.8, 115.9. HRMS (ESI):  $m/z$   $[\text{M}+\text{H}]^+$  calcd for  $\text{C}_{20}\text{D}_{22}\text{H}_4\text{N}_2\text{O}_5$ : 397.3295; found: 397.3297.

**5,7-dideuterio-4,6-bis[1,1,2,2,3,3-hexadeuterio-3-(trideuteriomethoxy)propyl]-8-[(2,2,2-trideuterioacetyl)amino]quinoline-2-carboxylic acid (1x)**

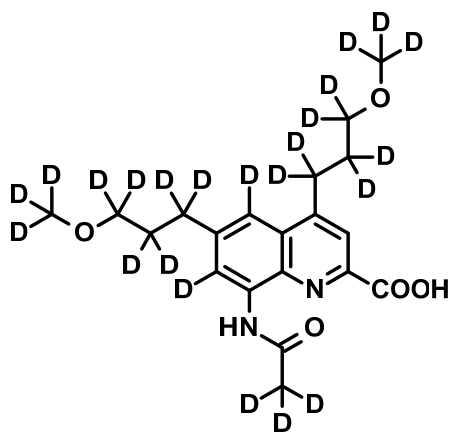

Using **General Procedure 6** and 200 mg **methyl 5,7-dideuterio-4,6-bis[1,1,2,2,3,3-hexadeuterio-3-(trideuteriomethoxy)propyl]-8-[(2,2,2-trideuterioacetyl)amino]quinoline-2-carboxylate** (70% purity, 0.340 mmol, 1.0 equiv.), 41 mg **5,7-dideuterio-4,6-bis[1,1,2,2,3,3-hexadeuterio-3-(trideuteriomethoxy)propyl]-8-[(2,2,2-trideuterioacetyl)amino]quinoline-2-carboxylic acid** was obtained as a yellow oil (99.5% purity, 0.103 mmol, 30%).

HPLC-UV purity: 99.5%.

$^1\text{H}$  NMR (500 MHz,  $[\text{D}_6]\text{DMSO}$ ):  $\delta$  10.51 (s, 1H, NH), 7.97 (s, 1H, Ar-H).  $^{13}\text{C}$  NMR (125 MHz,  $[\text{D}_6]\text{DMSO}$ ):  $\delta$  169.2, 166.3, 149.4, 146.3, 142.5, 135.9, 135.6,

127.8, 120.4. HRMS (ESI):  $m/z$   $[\text{M}+\text{H}]^+$  calcd for  $\text{C}_{20}\text{D}_{23}\text{H}_3\text{N}_2\text{O}_5$ : 398.3358; found: 398.3359.



**3,5,7-trideuterio-4,6-bis[1,1,2,2,3,3-hexadeuterio-3-(trideuteriomethoxy)propyl]-8-[(2,2,2-trideuterioacetyl)amino]quinoline-2-carboxylic acid (1y)**

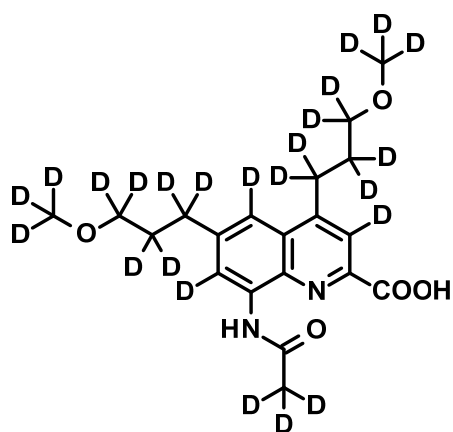

Using **General Procedure 6** and 170 mg **methyl 3,5,7-trideuterio-4,6-bis[1,1,2,2,3,3-hexadeuterio-3-(trideuteriomethoxy)propyl]-8-[(2,2,2-trideuterioacetyl)amino]quinoline-2-carboxylate** (62% purity, 0.256 mmol, 1.0 equiv.), 40 mg **3,5,7-trideuterio-4,6-bis[1,1,2,2,3,3-hexadeuterio-3-(trideuteriomethoxy)propyl]-8-[(2,2,2-trideuterioacetyl)amino]quinoline-2-carboxylic acid** was obtained as a yellow oil (99.2% purity, 0.099 mmol, 39%).

HPLC-UV purity: 99.2%.

$^1\text{H}$  NMR (500 MHz,  $[\text{D}_6]\text{DMSO}$ ):  $\delta$  10.54 (s, 1H, NH).  $^{13}\text{C}$  NMR (125 MHz,  $[\text{D}_6]\text{DMSO}$ ):  $\delta$  169.2, 166.3, 149.3, 146.2, 142.5, 135.9, 135.6, 127.8. HRMS

(ESI):  $m/z$   $[\text{M}+\text{H}]^+$  calcd for  $\text{C}_{20}\text{D}_{24}\text{H}_2\text{N}_2\text{O}_5$ : 399.3421; found: 399.3419.

**8-acetamido-N-benzyl-4,6-bis(3-methoxypropyl)quinoline-2-carboxamide (14)**

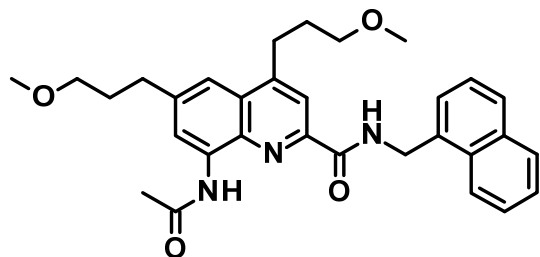

A 20 mL, screw-cap vial equipped with a magnetic stirring bar was filled with 40.00 mg **8-acetamido-4,6-bis(3-methoxypropyl)quinoline-2-carboxylic acid** (1.0 equiv., 0.1068 mmol), 61.4 mg benzotriazol-1-yloxy-tris(dimethylamino)phosphonium, hexafluorophosphate (1:1) (1.3 equiv., 0.1389 mmol), and 37  $\mu\text{L}$  DIPEA (2.0 equiv., 0.2137 mmol) and 3.21 mL dry, degassed DCM. The mixture was stirred at RT for 30 min,

then 20.99 mg **1-naphthylmethanamine** (2.0 equiv., 0.2137 mmol) was added and the reaction mixture was stirred for further 30 min, until full conversion was observed. The mixture was concentrated *in vacuo*. Then the crude product was purified *via* RP-HPLC using 1% aq. HCOOH solution and MeCN as eluents to yield 42 mg **8-acetamido-N-benzyl-4,6-bis(3-methoxypropyl)quinoline-2-carboxamide** (0.0818 mmol, 77%) as white crystals.

$^1\text{H}$  NMR (500 MHz,  $[\text{D}_6]\text{DMSO}$ ):  $\delta$  10.32 (s, 1H, NH), 10.07 (t,  $J$  = 6.2 Hz, 1H, NH), 8.63 (d,  $J$  = 1.5 Hz, 1H, Ar-H), 8.32 (d,  $J$  = 8.3 Hz, 1H, Ar-H), 8.09 (s, 1H, Ar-H), 7.97 (dd,  $J$  = 1.1 Hz, 8.0 Hz, 1H, Ar-H), 7.86 (d,  $J$  = 8.0 Hz, 1H, Ar-H), 7.65 (d,  $J$  = 1.5 Hz, 1H, Ar-H), 7.63-7.47 (m, 4H, Ar-H), 5.10 (d,  $J$  = 6.3 Hz, 2H, CH<sub>2</sub>), 3.41 (t,  $J$  = 6.2 Hz, 2H, CH<sub>2</sub>), 3.37 (t,  $J$  = 6.2 Hz, 2H, CH<sub>2</sub>), 3.27 (s, 3H, CH<sub>3</sub>), 3.25 (s, 3H, CH<sub>3</sub>), 3.17 (t,  $J$  = 7.9 Hz, 2H, CH<sub>2</sub>), 2.83 (t,  $J$  = 7.9 Hz, 2H, CH<sub>2</sub>), 2.29 (s, 3H, CH<sub>3</sub>), 1.98-1.86 (m, 4H, CH<sub>2</sub>).  $^{13}\text{C}$  NMR (125 MHz,  $[\text{D}_6]\text{DMSO}$ ):  $\delta$  169.1, 164.2, 149.7, 147.1, 142.3, 135.7, 135.5, 134.5, 133.3, 130.8, 128.6, 128.0, 127.5, 126.3, 125.8, 125.5, 125.1, 123.5, 119.0, 118.5, 116.1, 71.03, 71.00, 57.9, 40.5, 32.7, 30.7, 29.4, 28.3, 24.7. HRMS (ESI):  $m/z$   $[\text{M}+\text{H}]^+$  calcd for  $\text{C}_{31}\text{H}_{35}\text{N}_3\text{O}_4$ : 514.2700; found: 514.2705.

### 4.3 NMR spectra of newly synthesized compounds

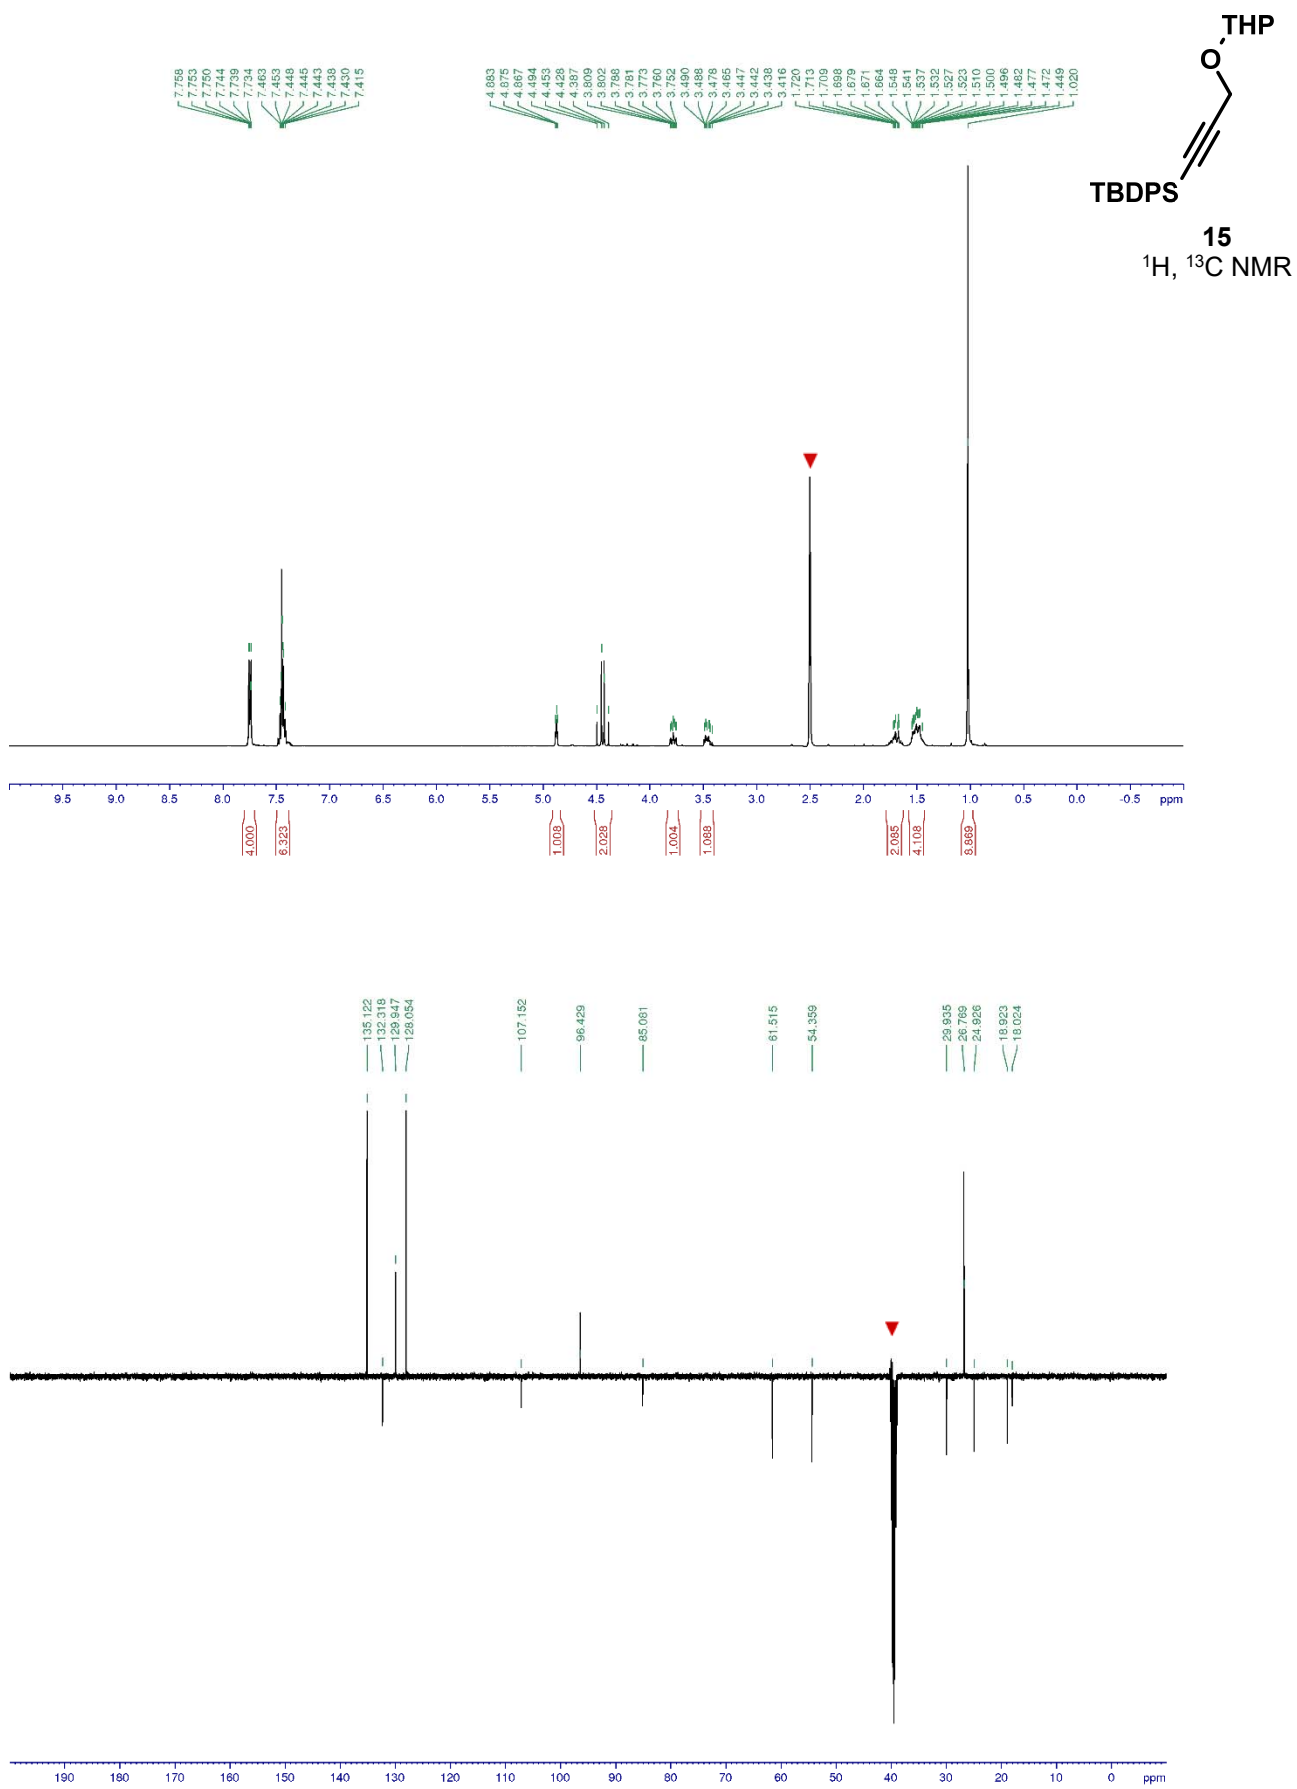

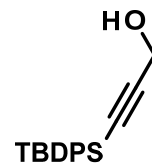

**8**  
<sup>1</sup>H, <sup>13</sup>C NMR

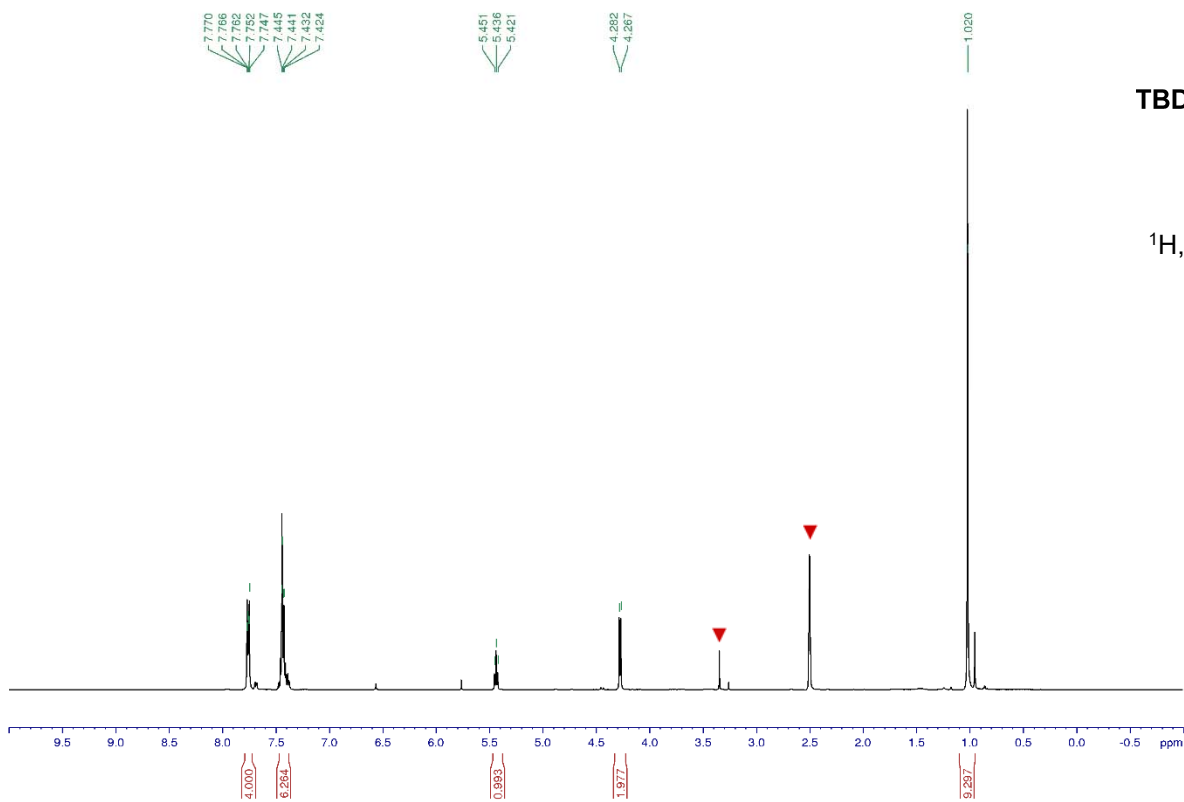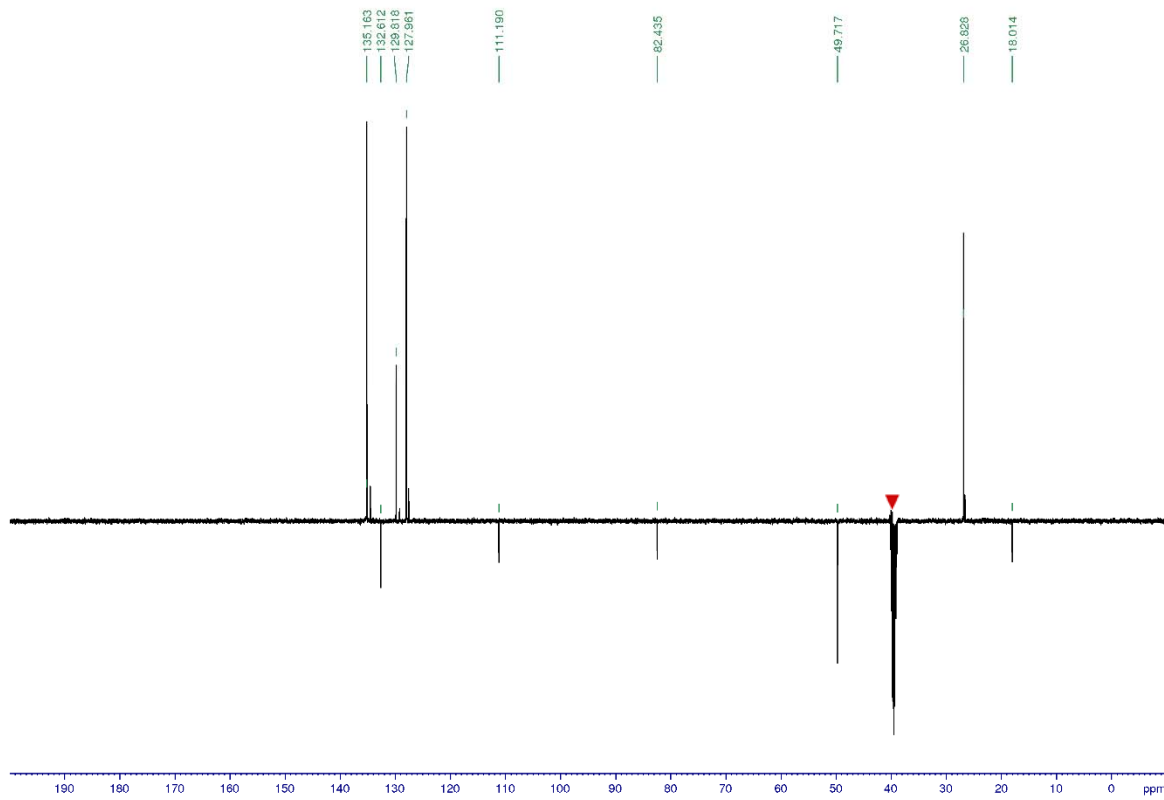

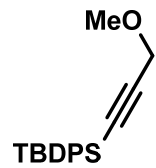

**16**  
 $^1\text{H}$ ,  $^{13}\text{C}$  NMR

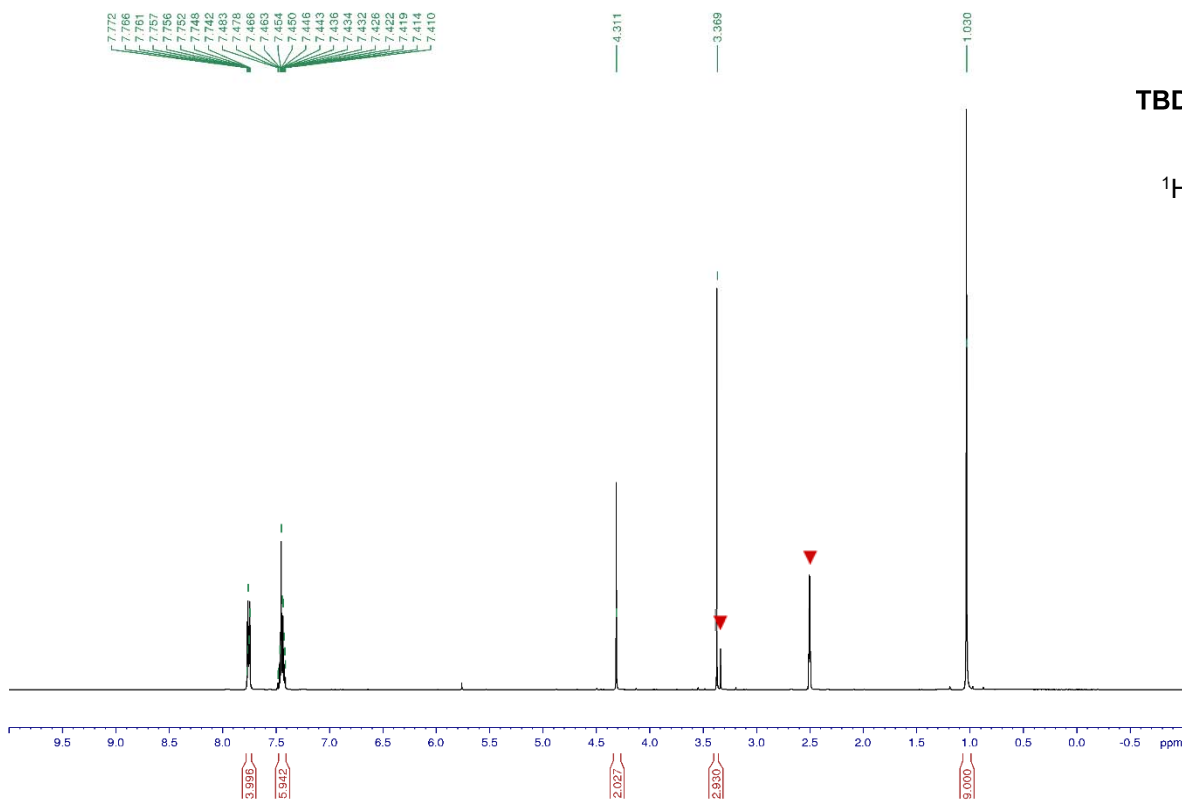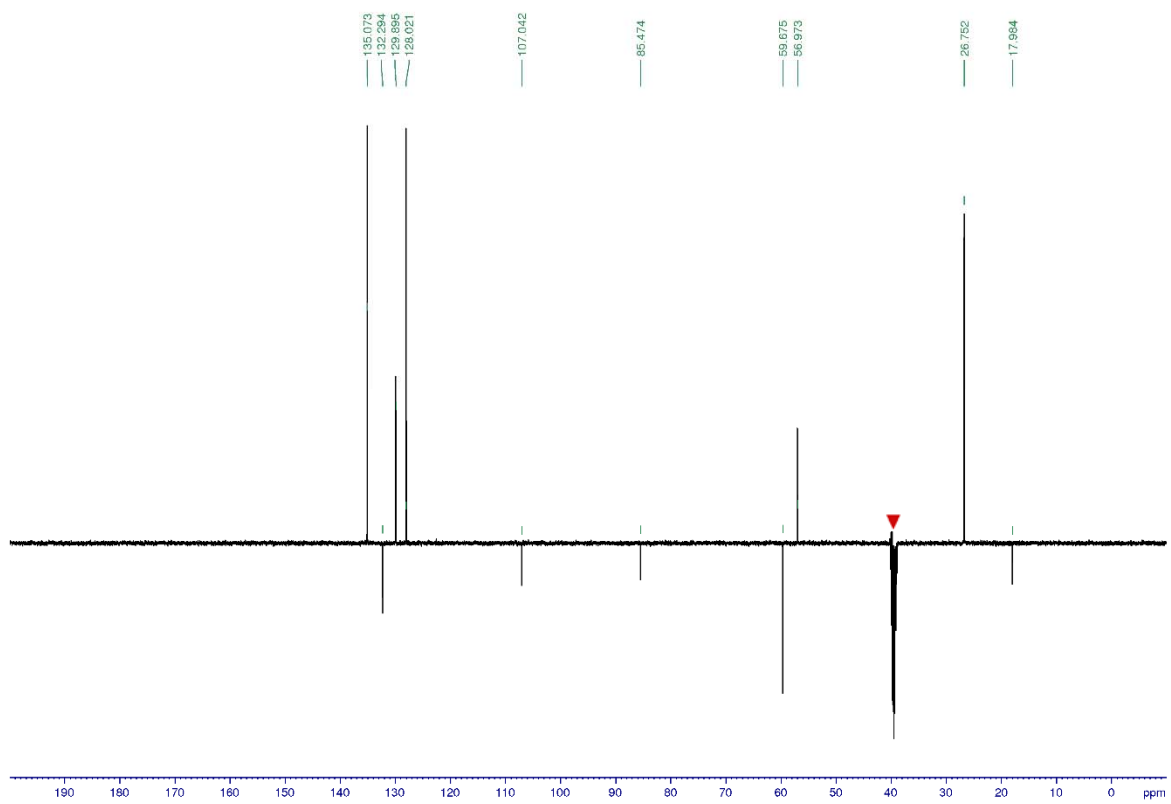

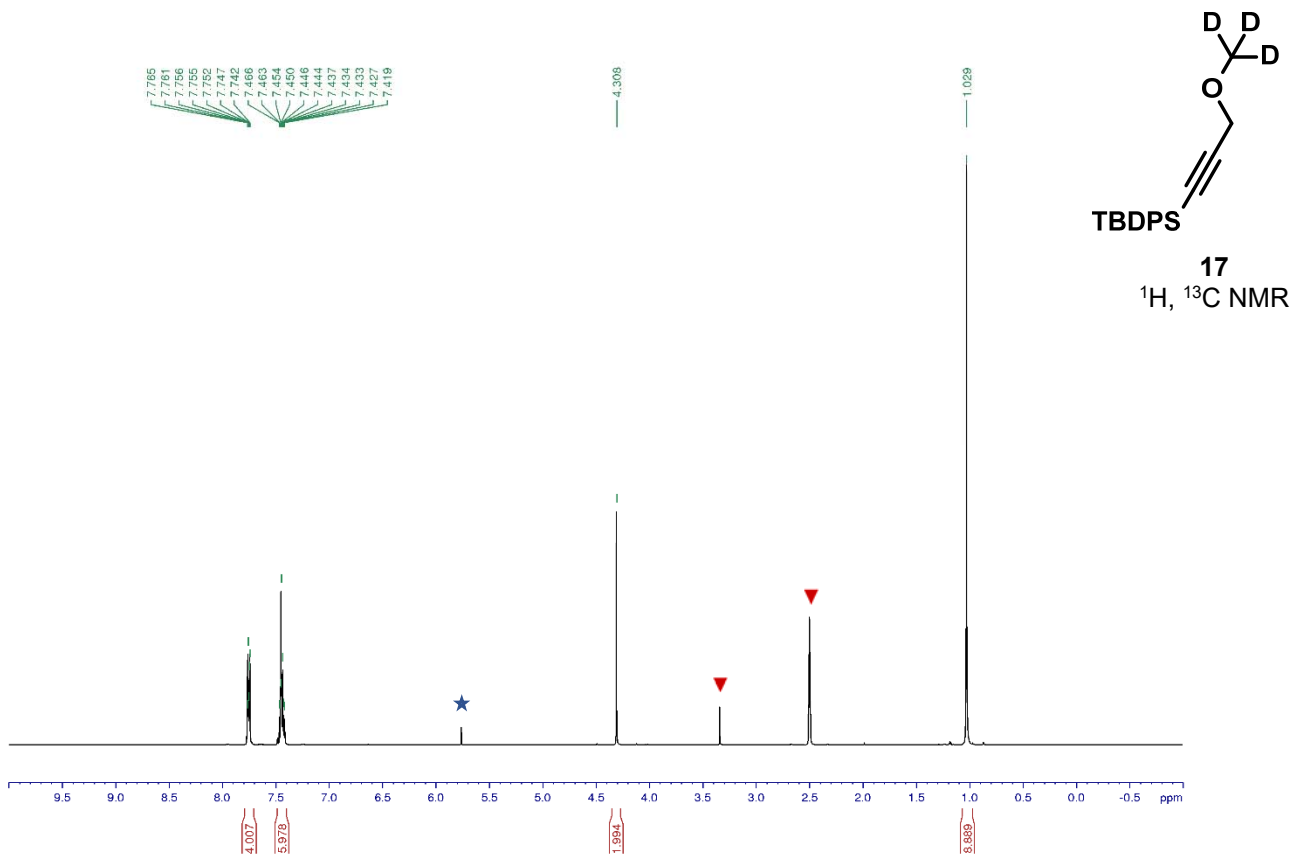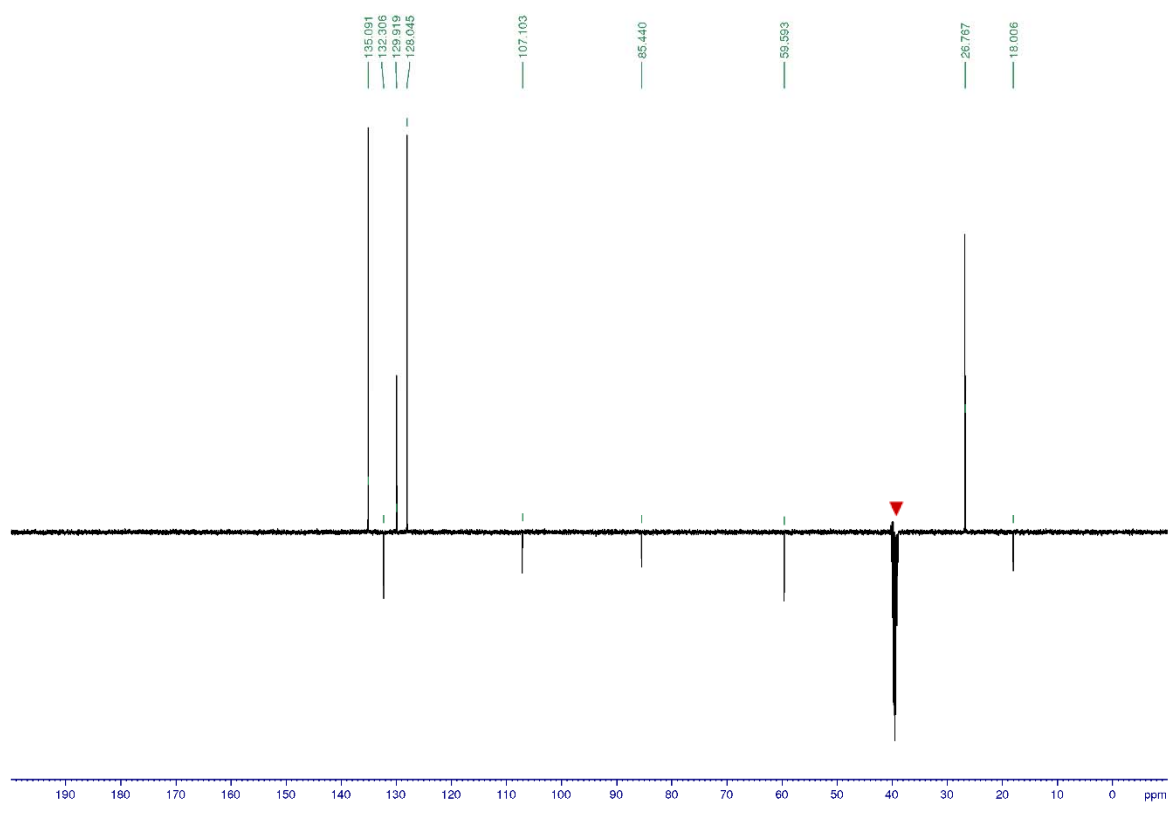

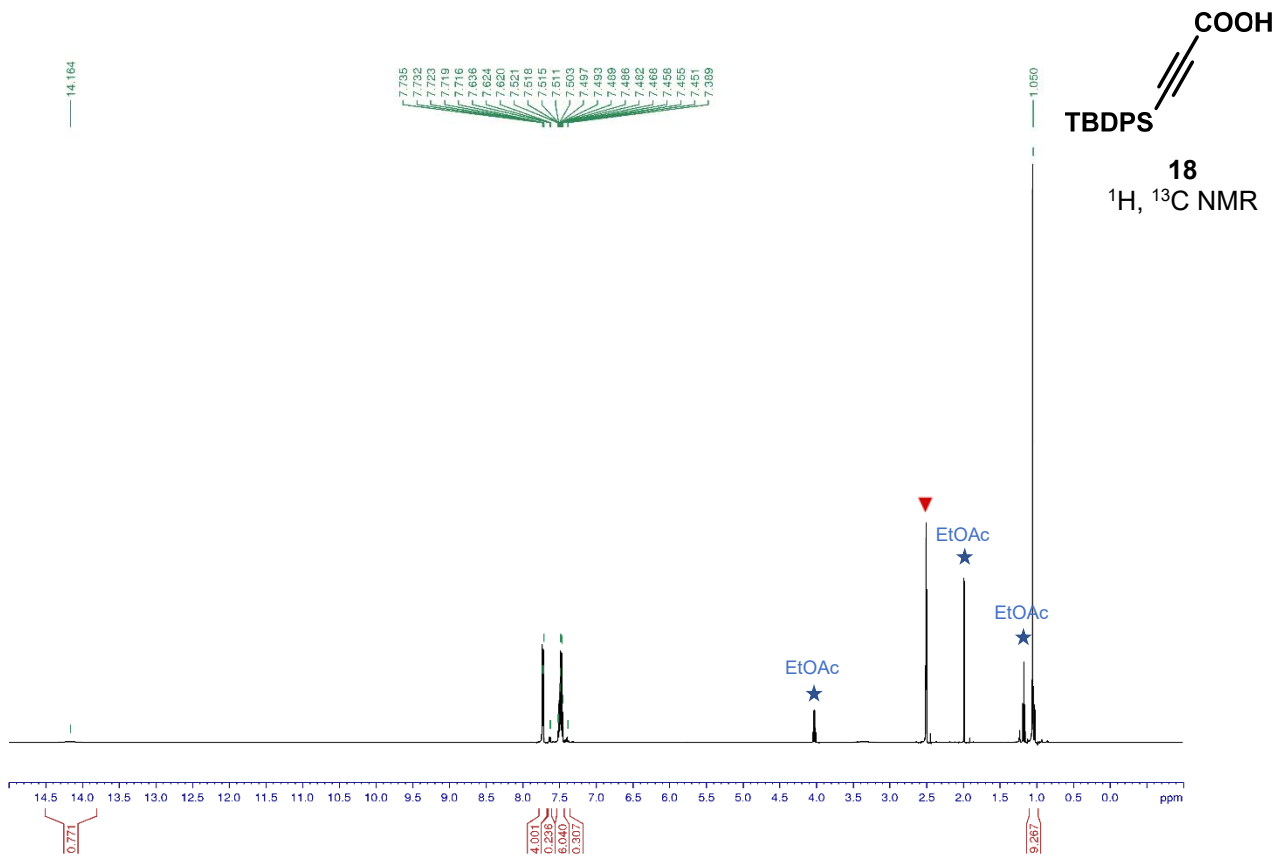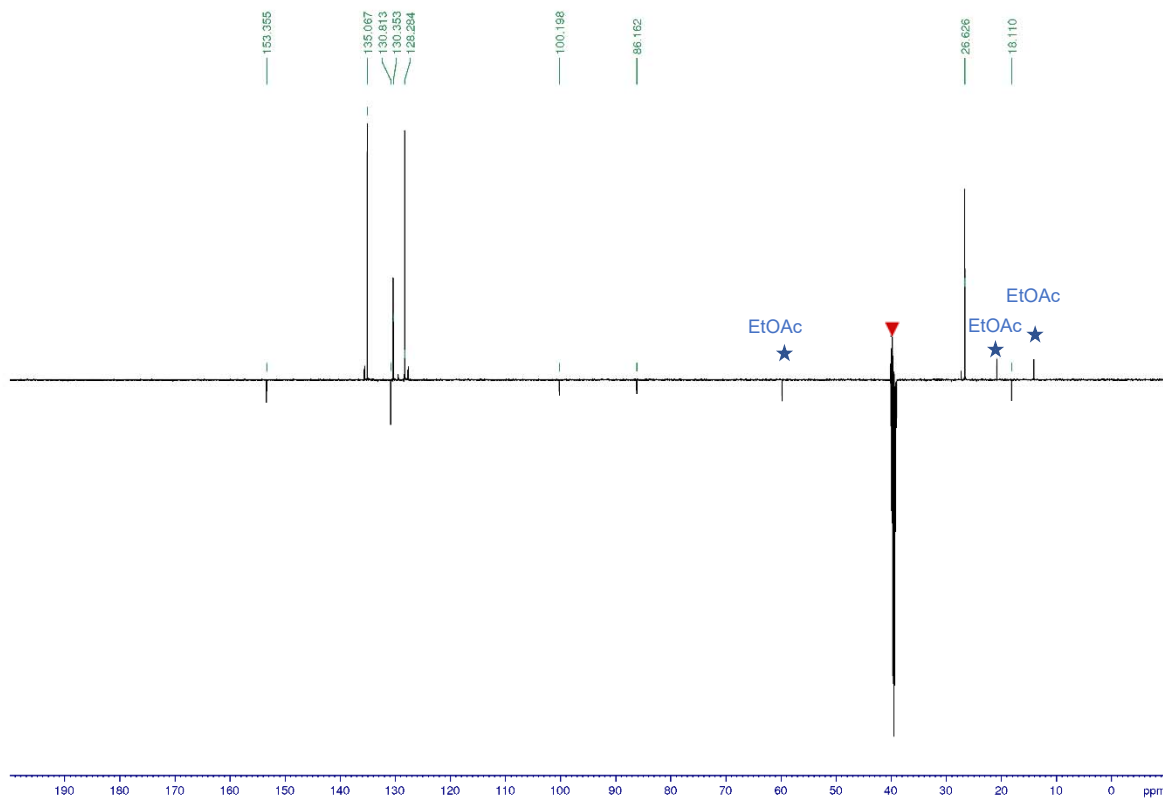

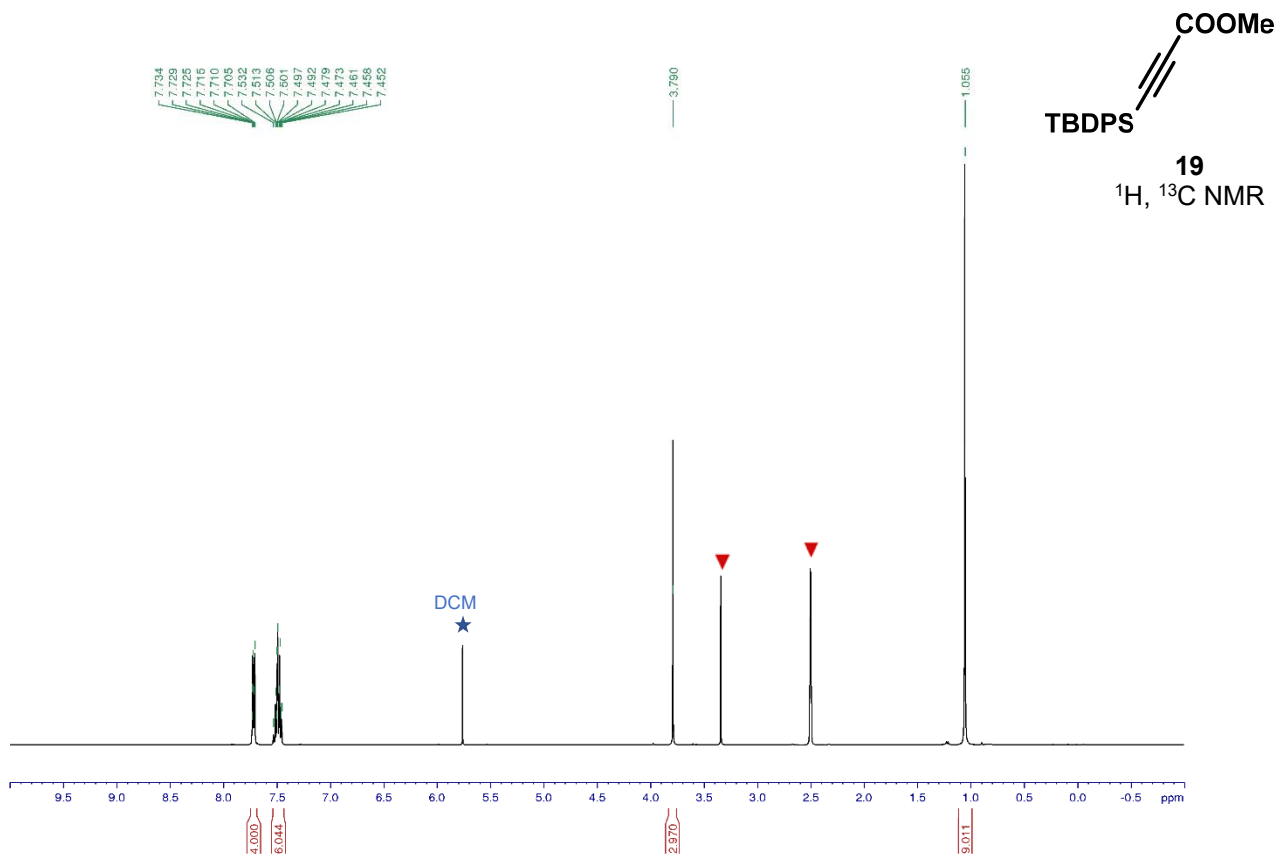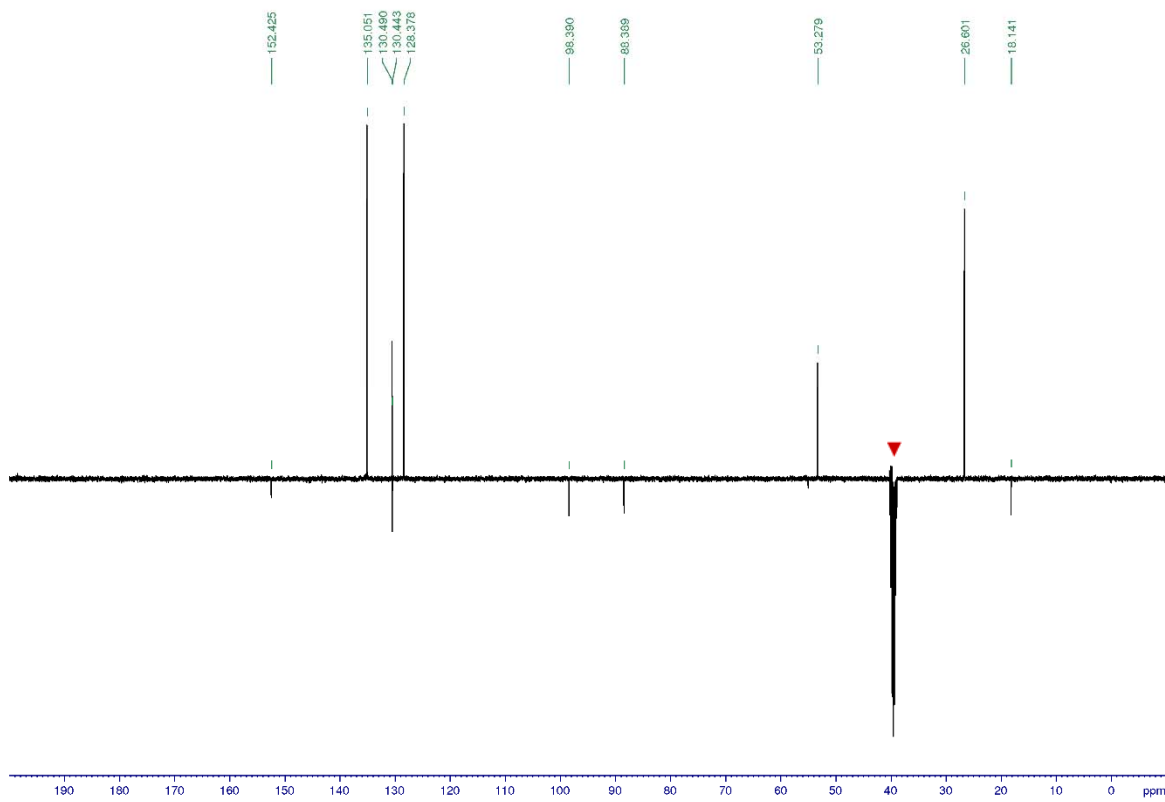

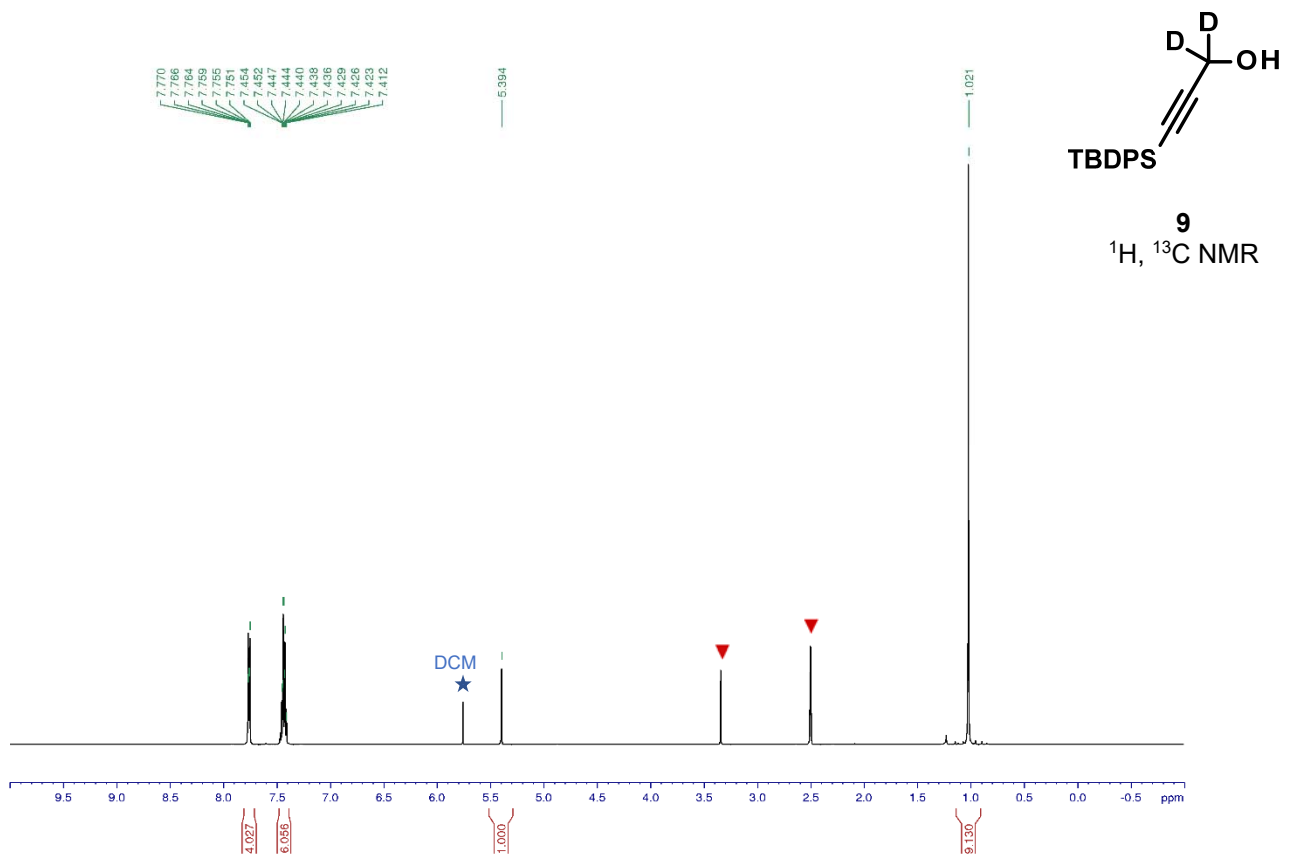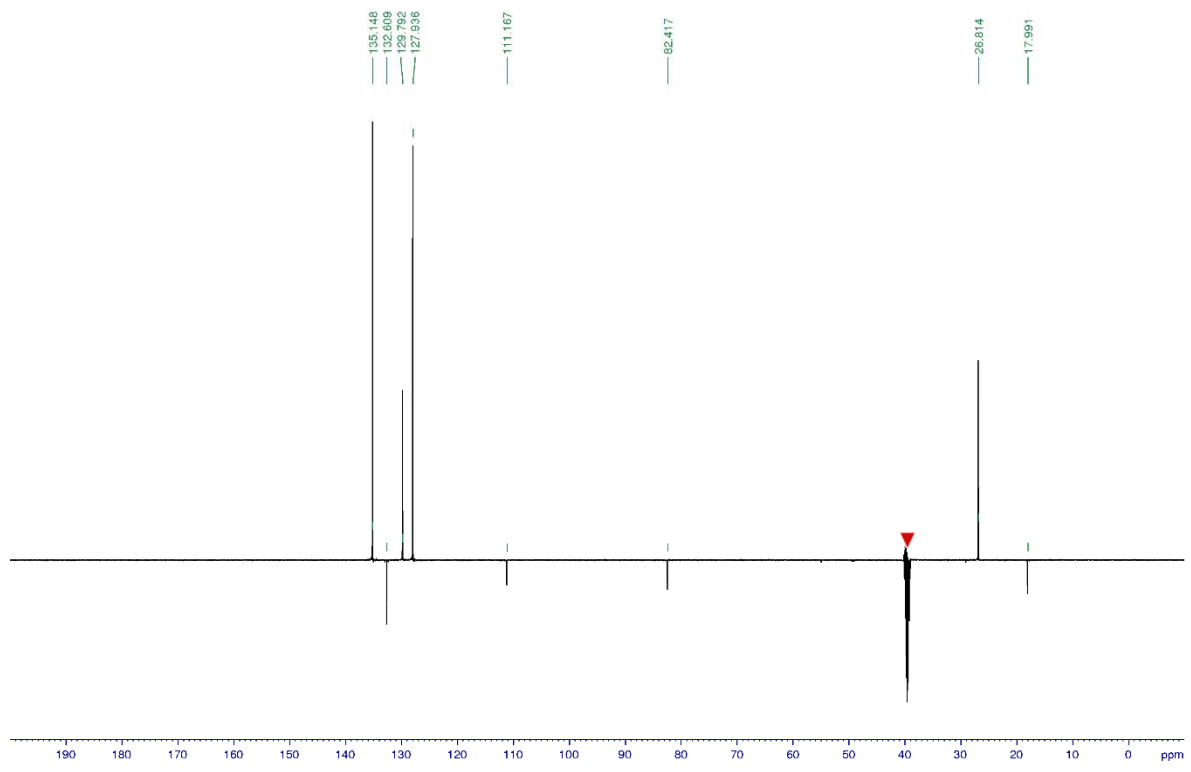



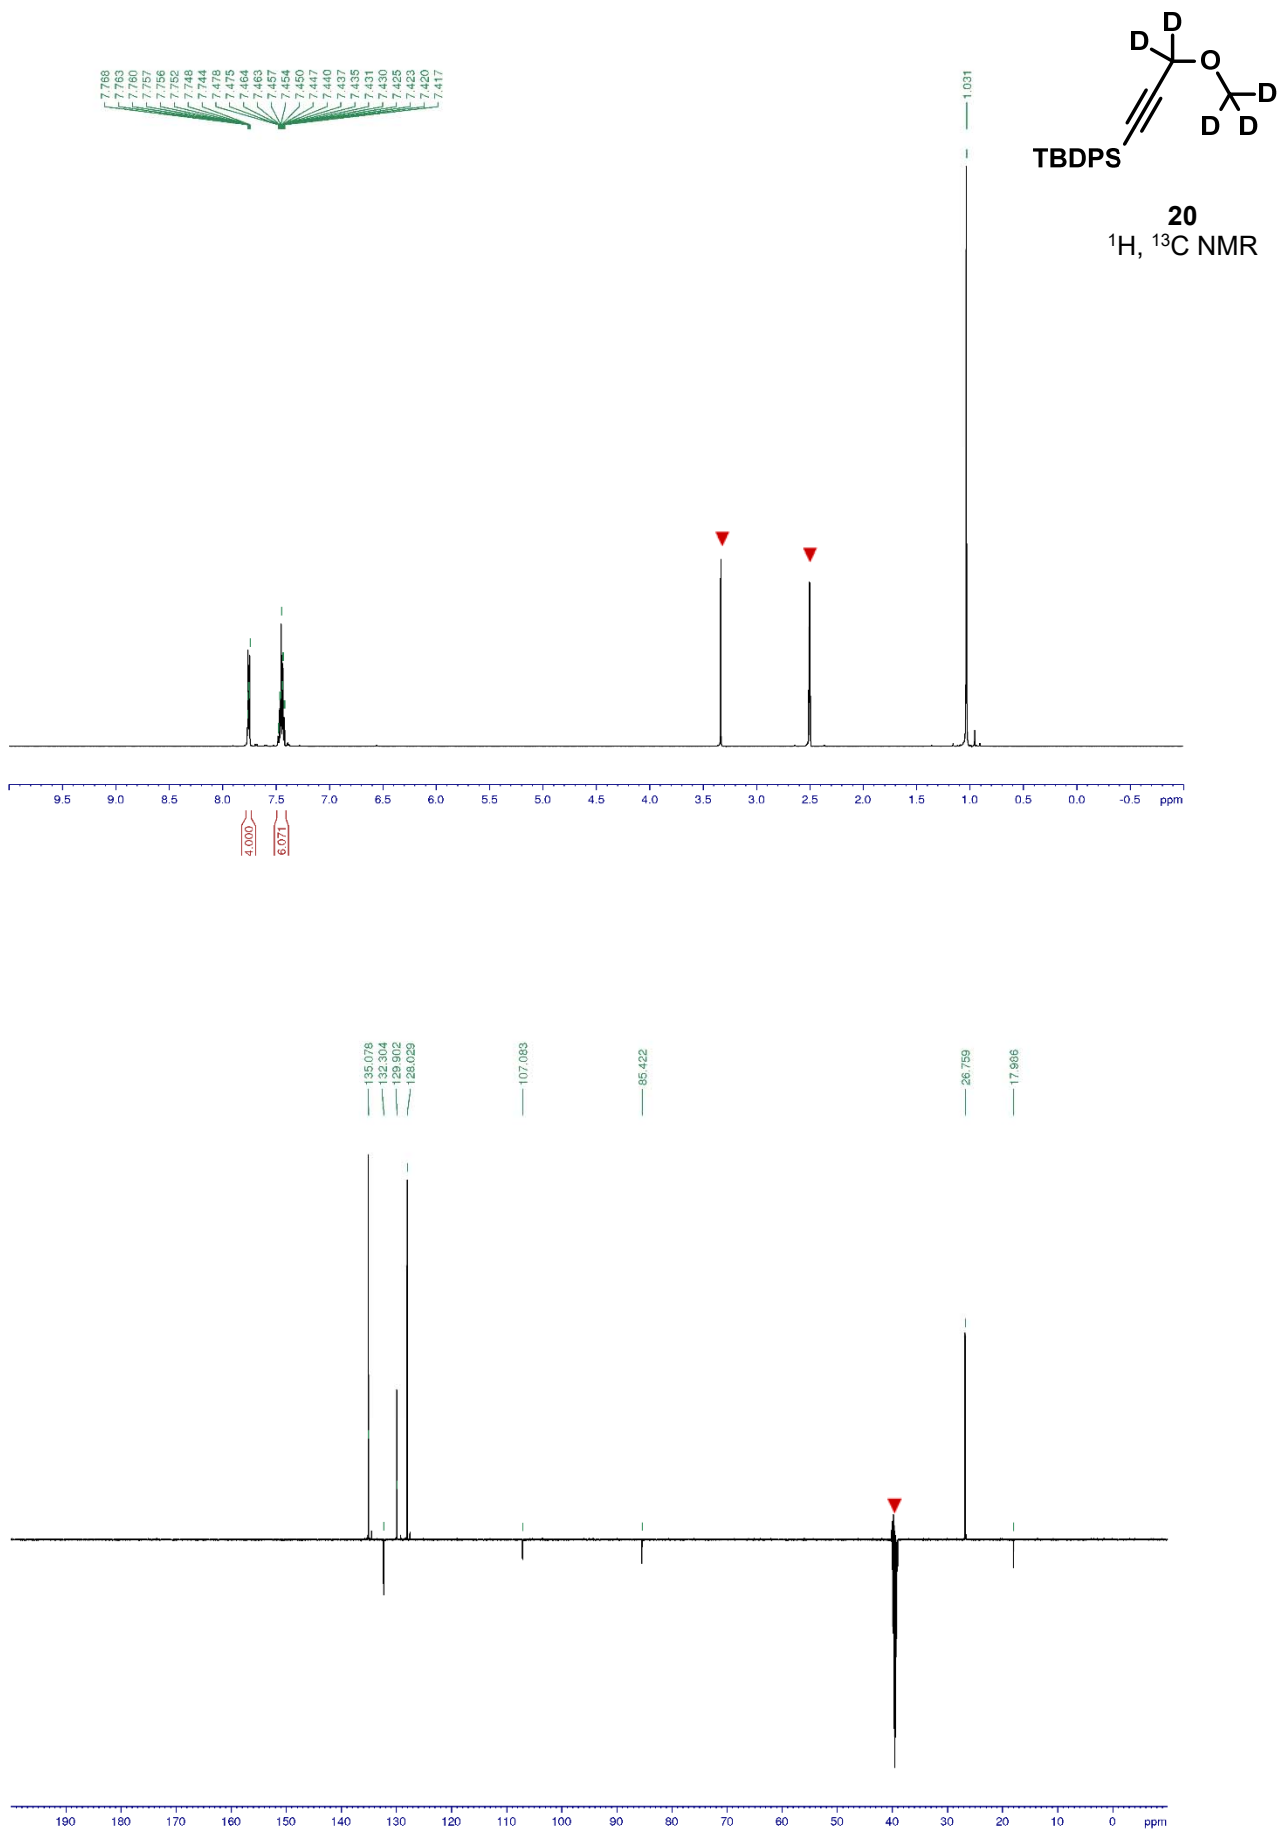

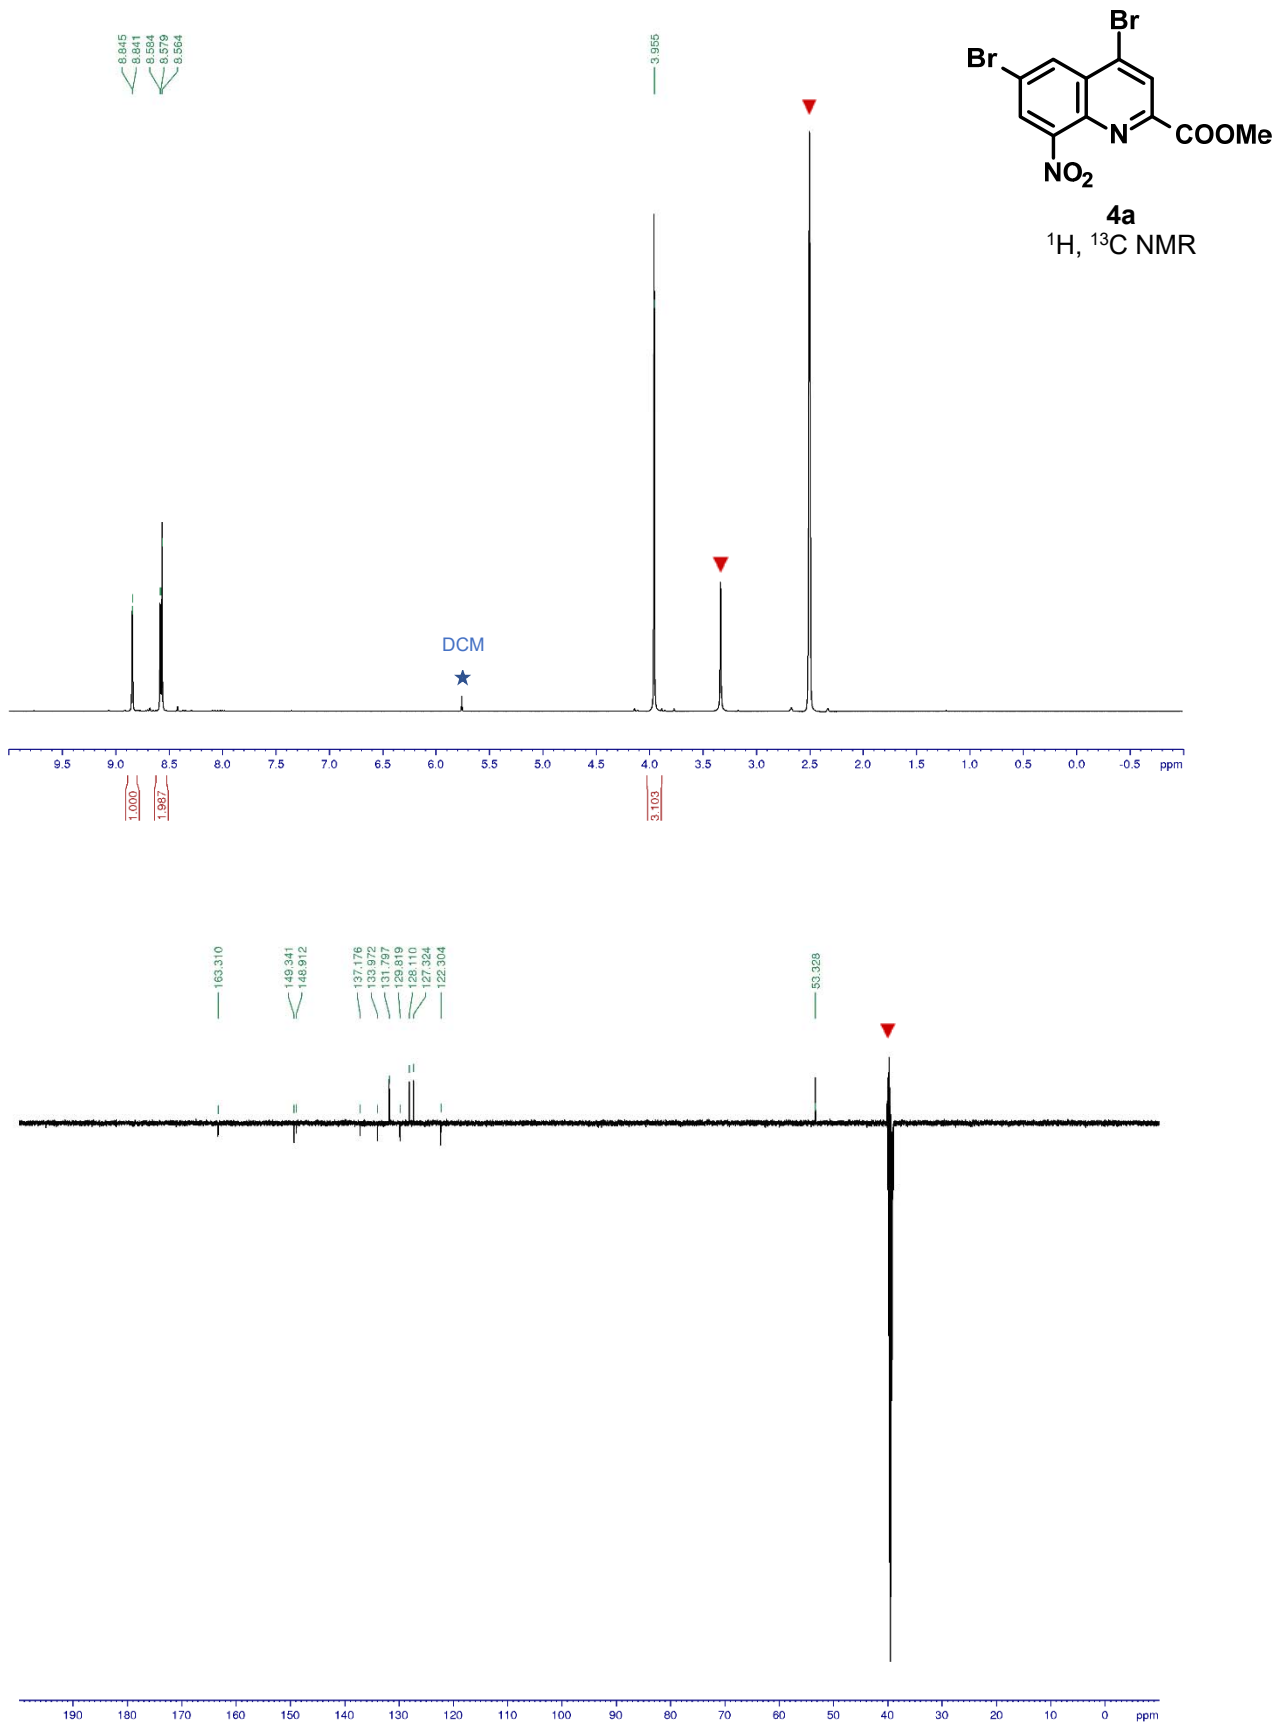

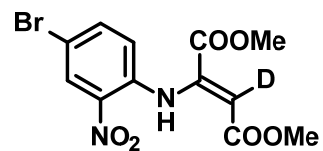

**2b**  
 $^1\text{H}$ ,  $^{13}\text{C}$  NMR

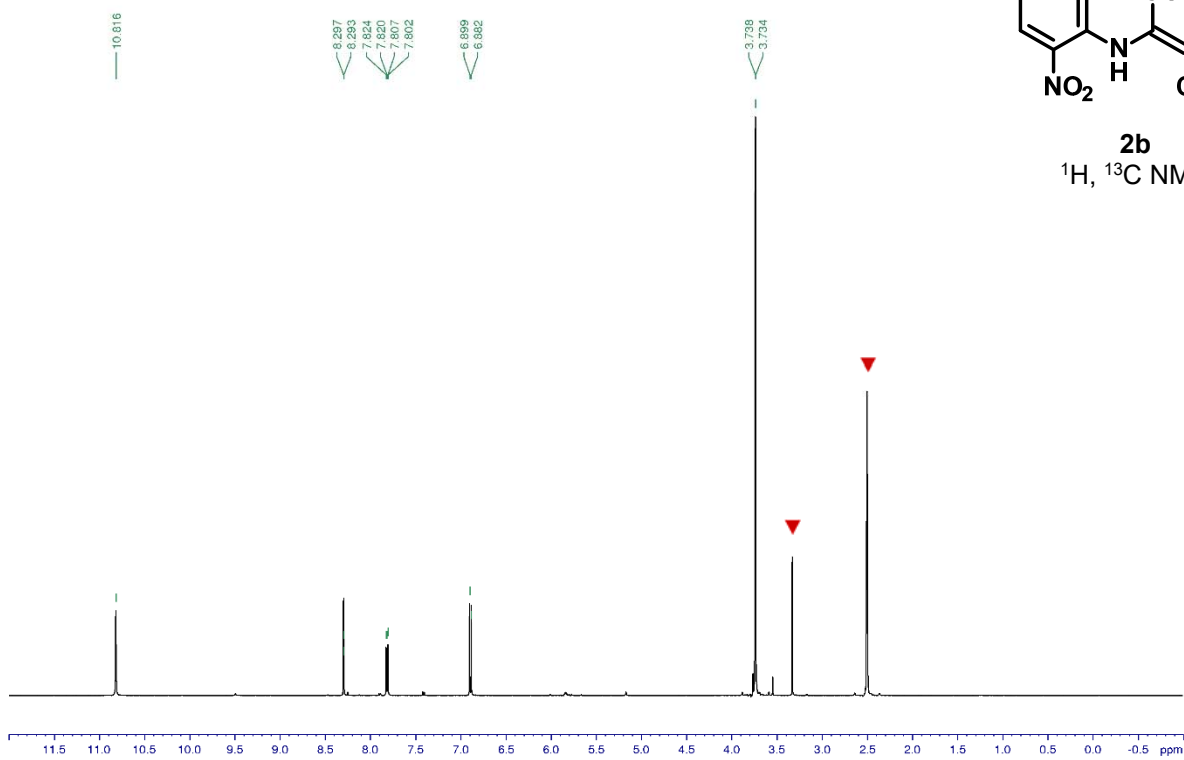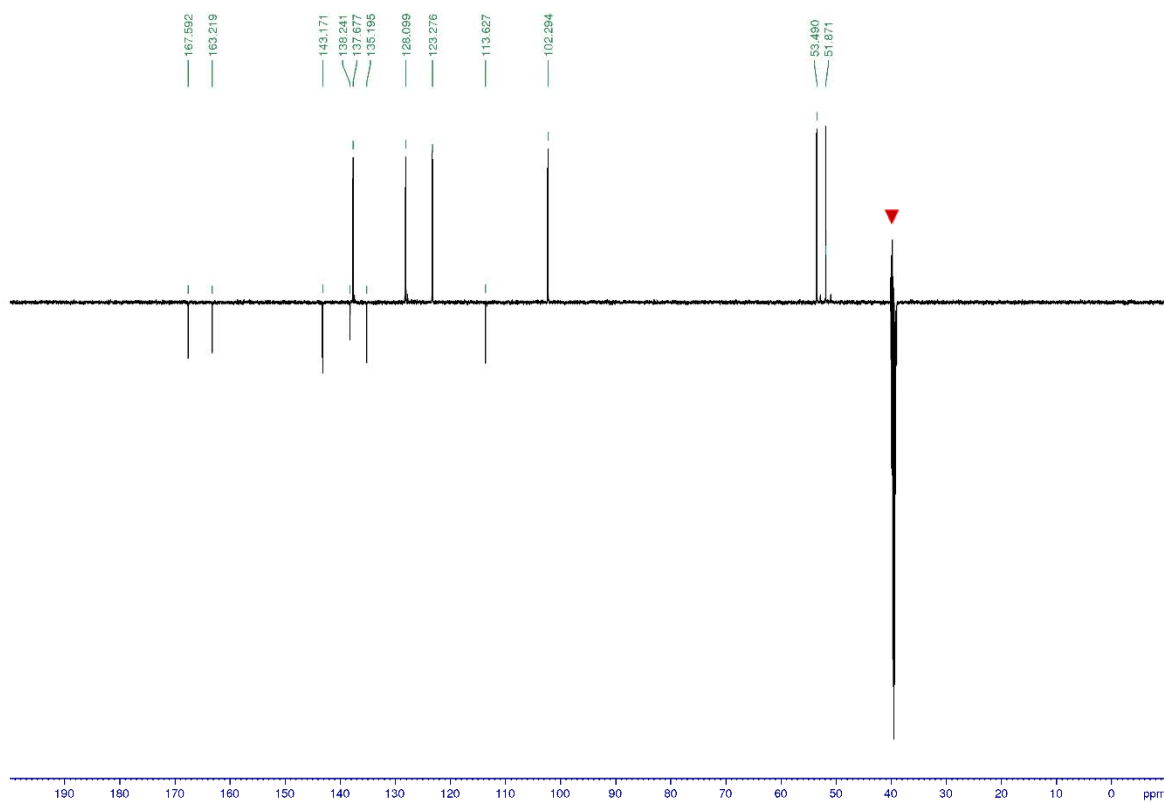

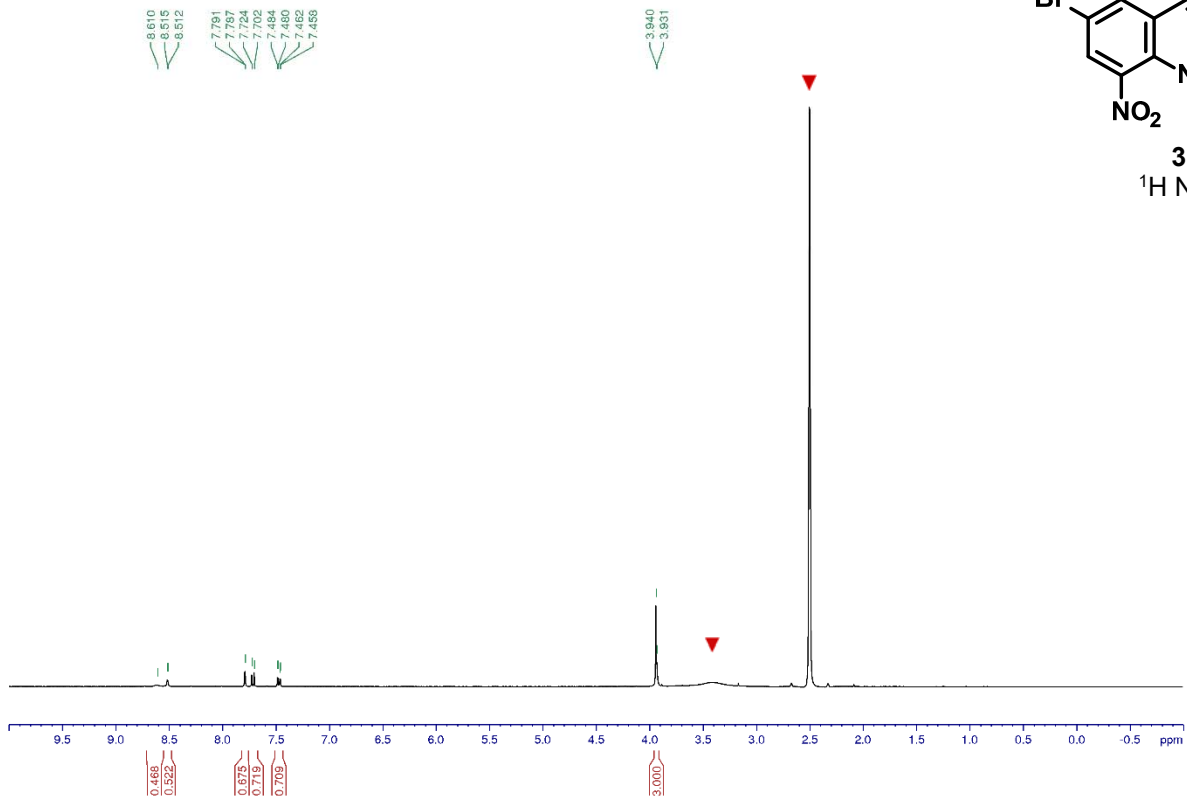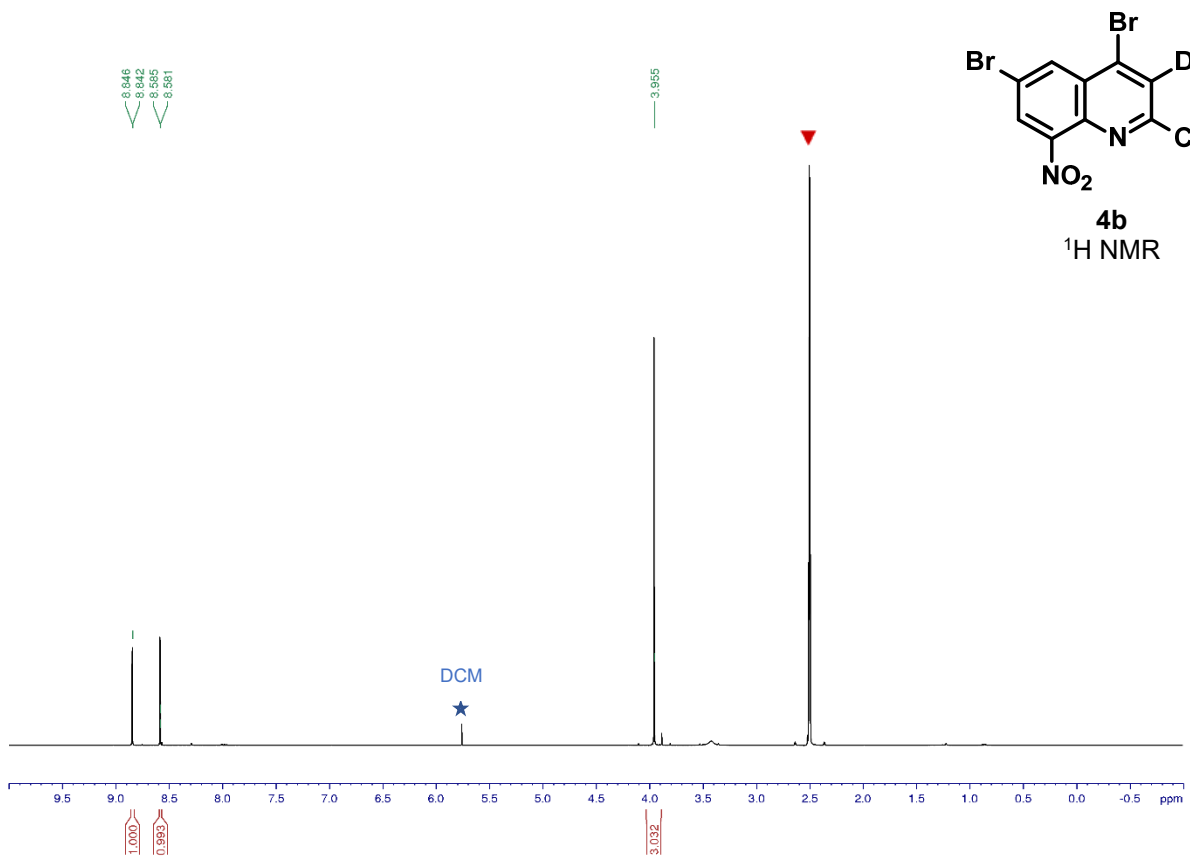

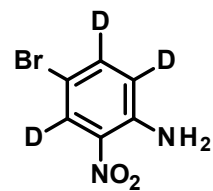

5  
 $^1\text{H}$ ,  $^{13}\text{C}$  NMR

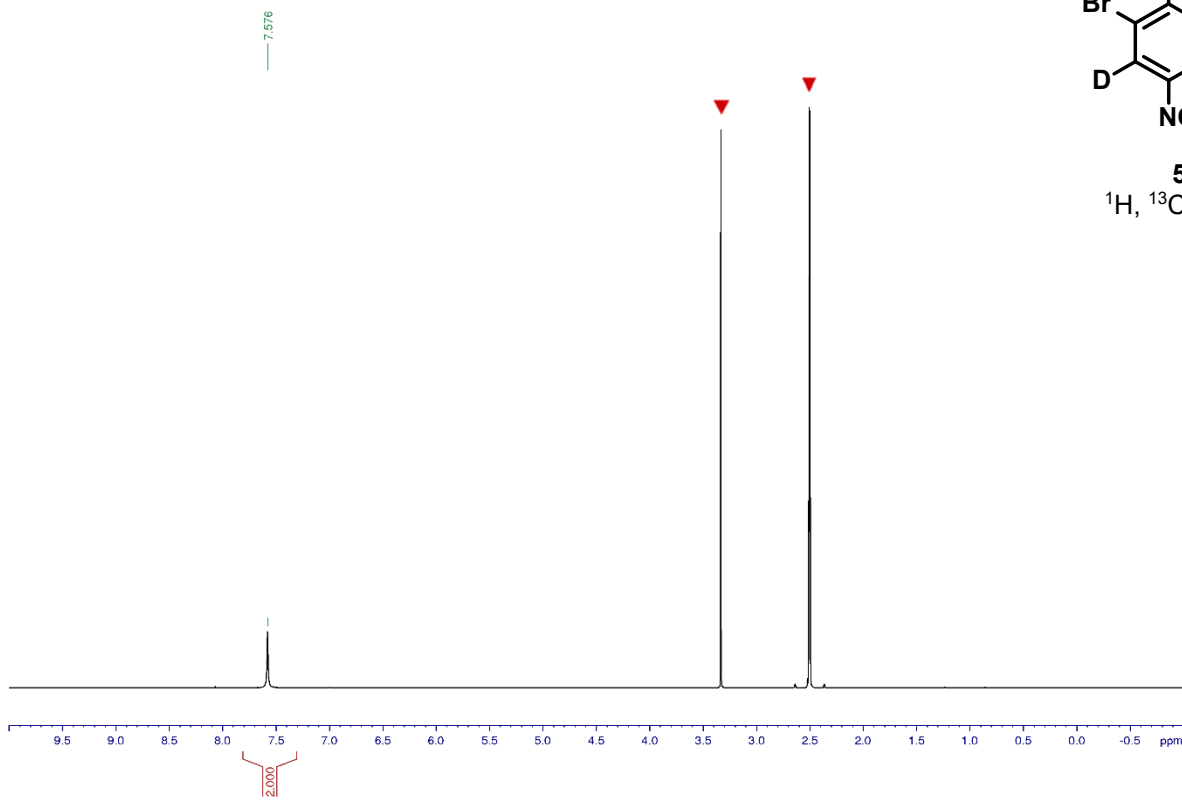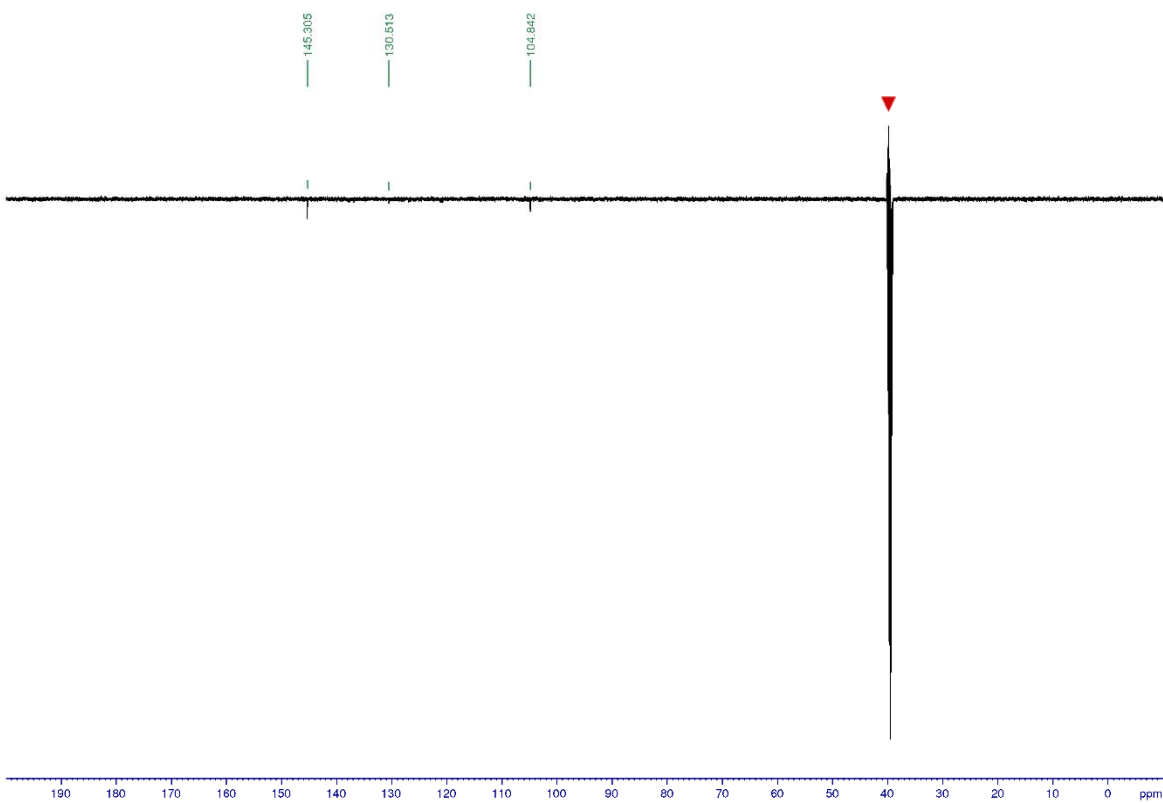

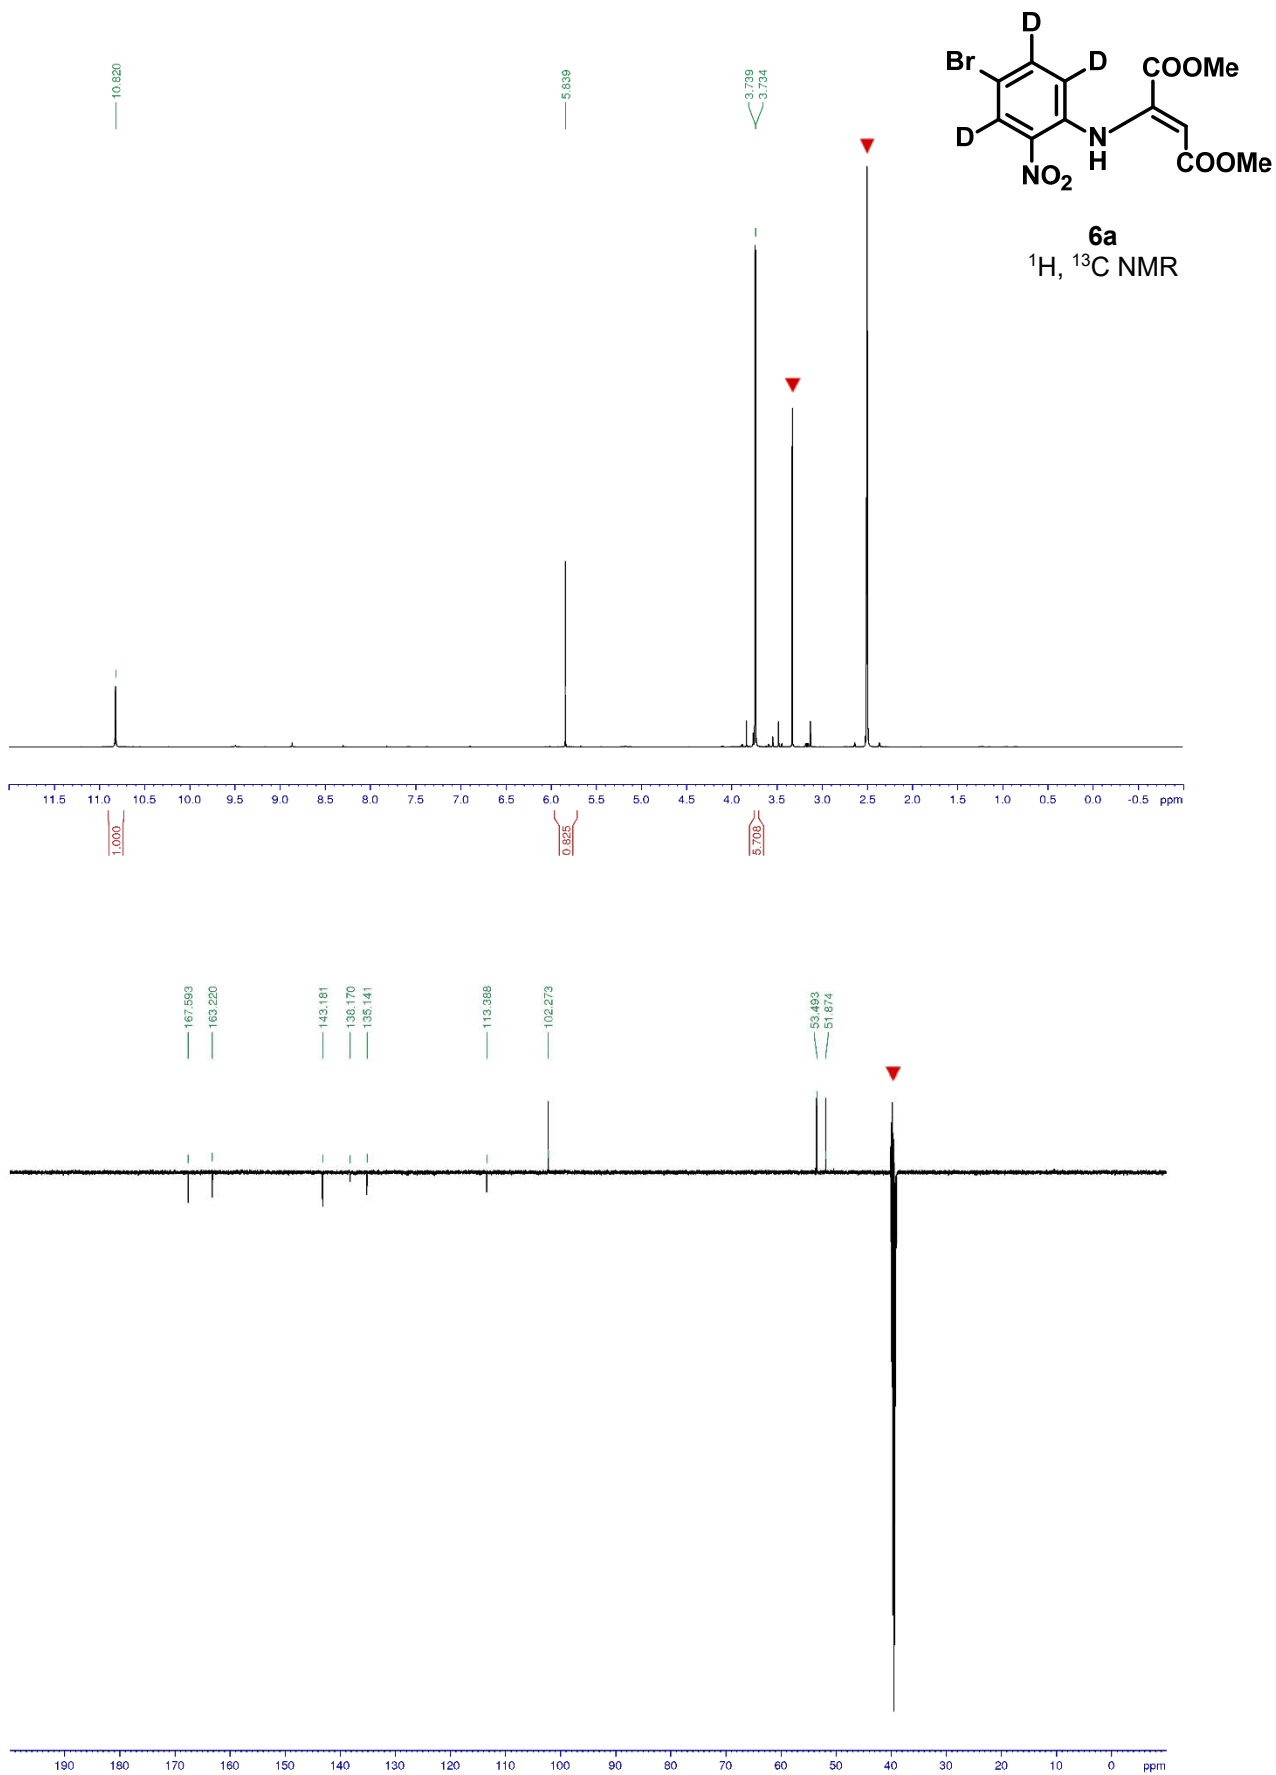

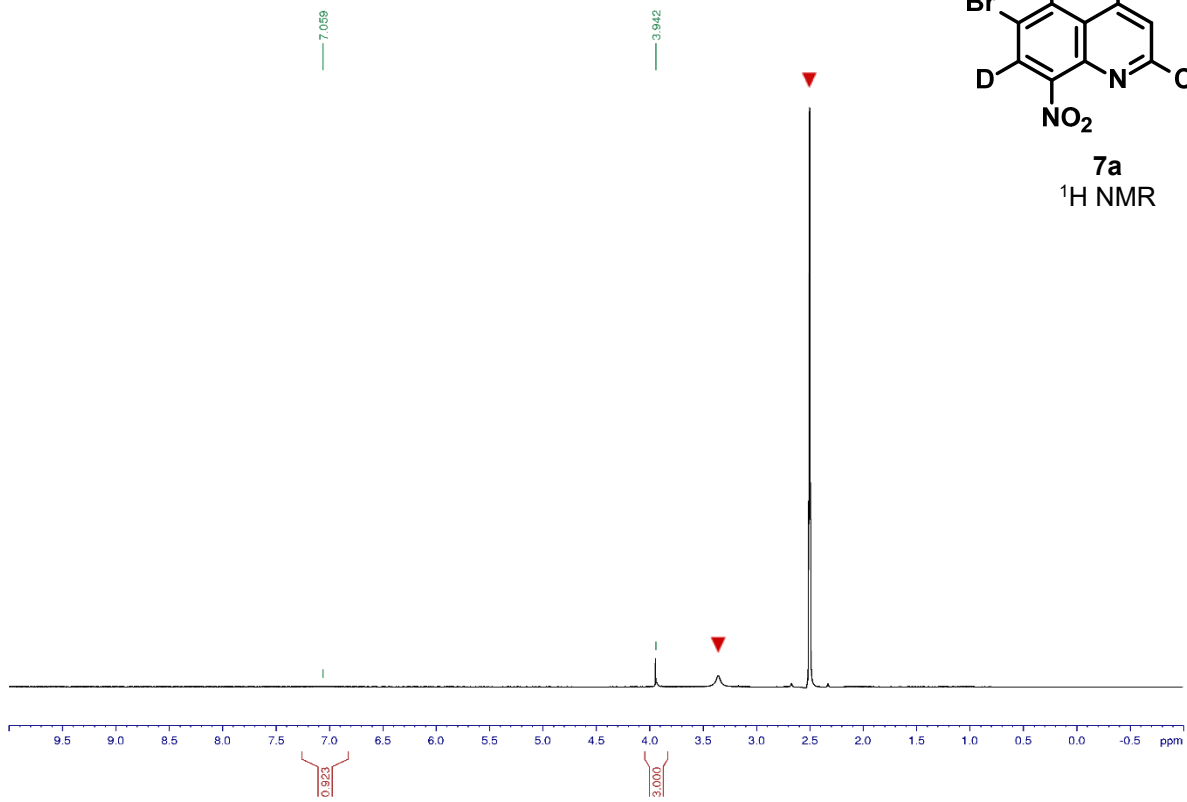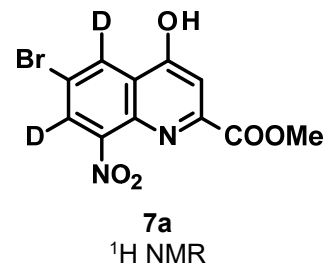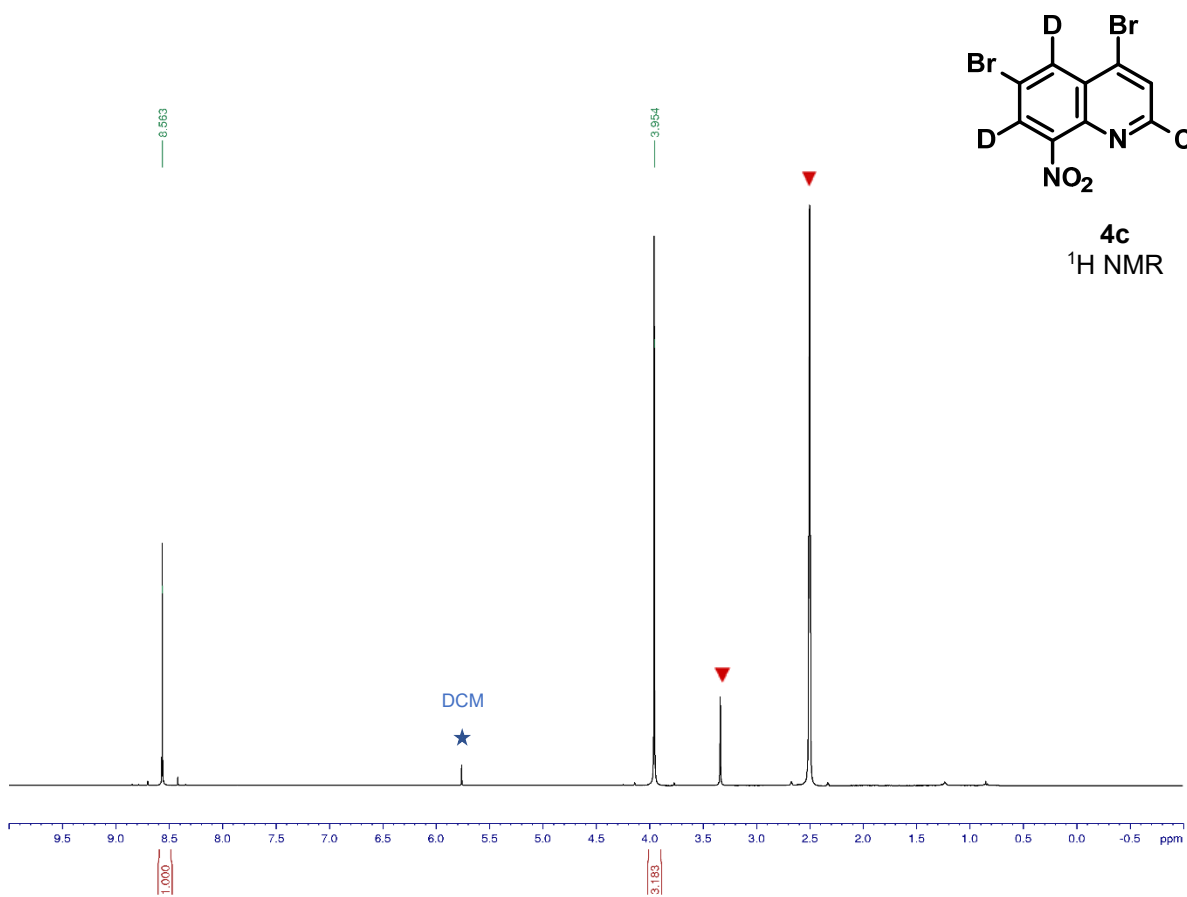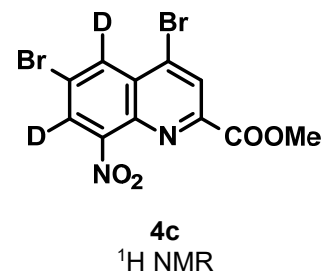

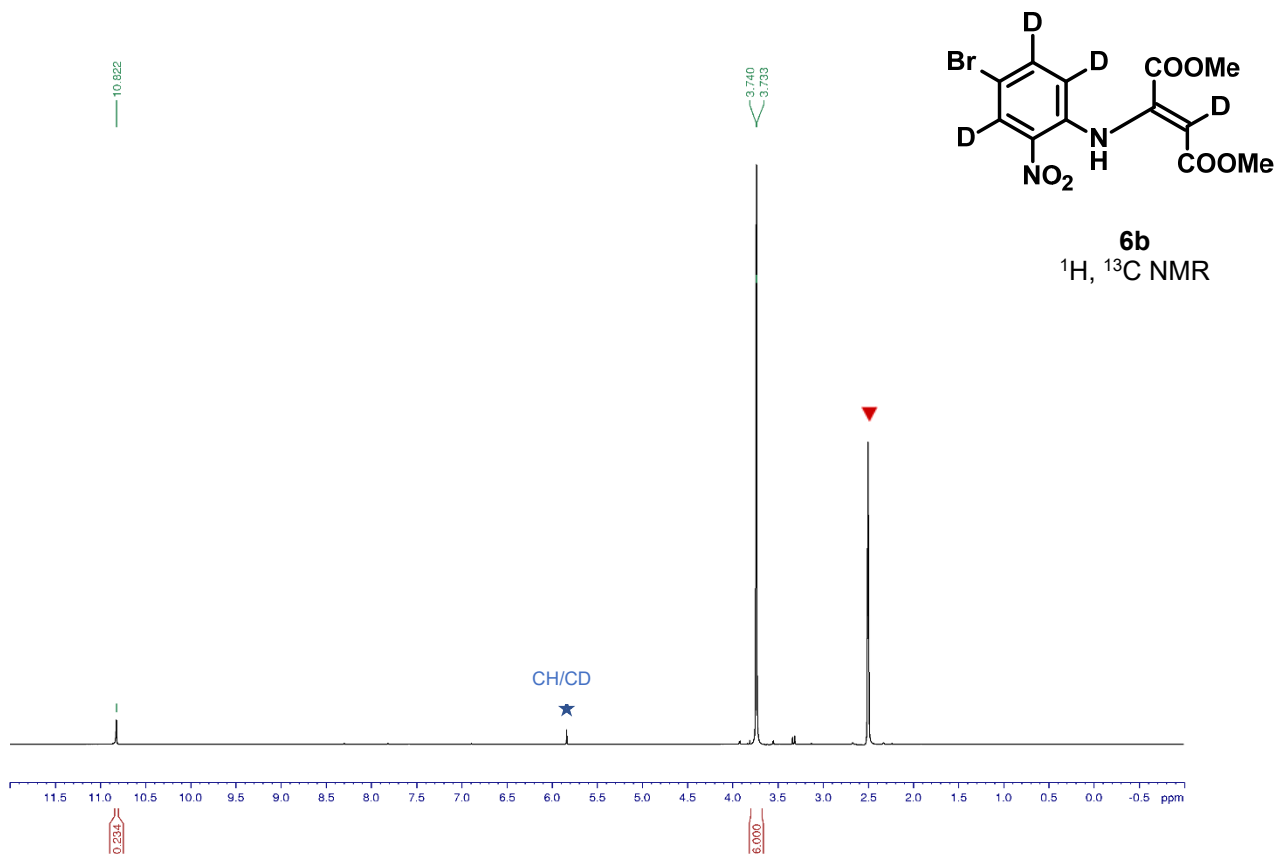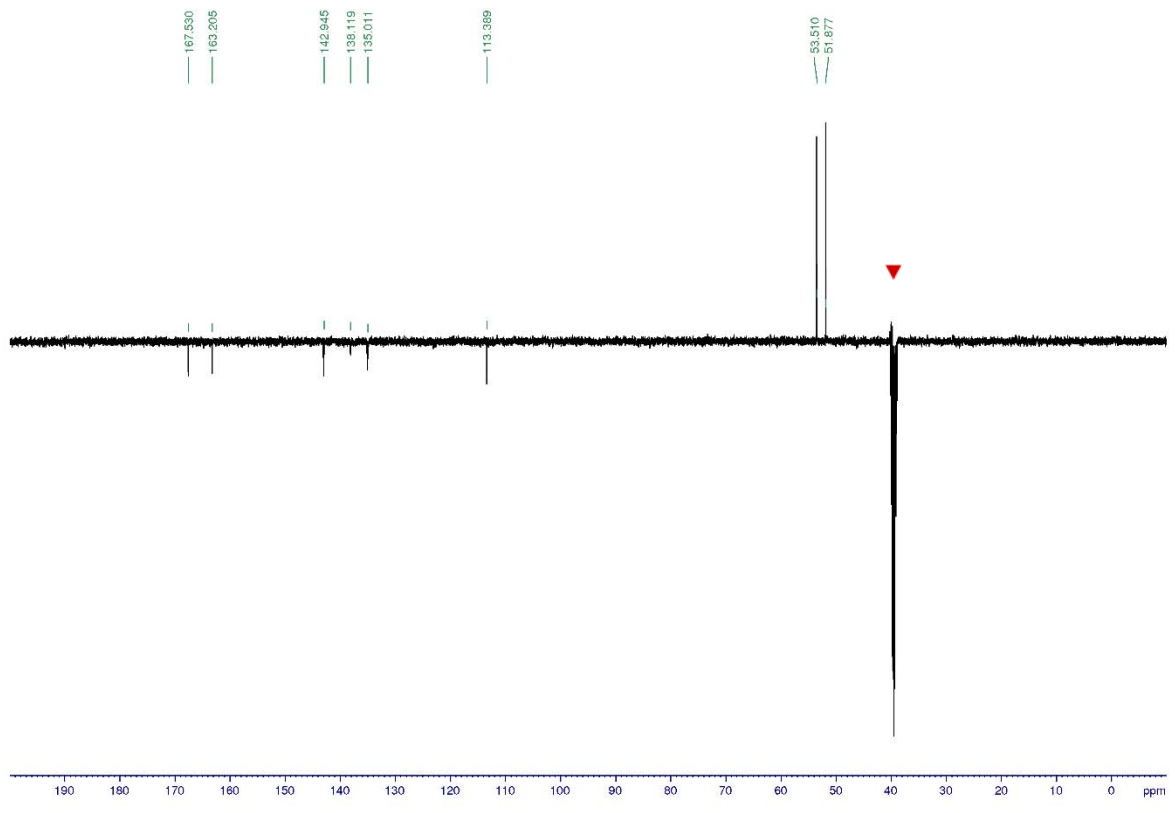



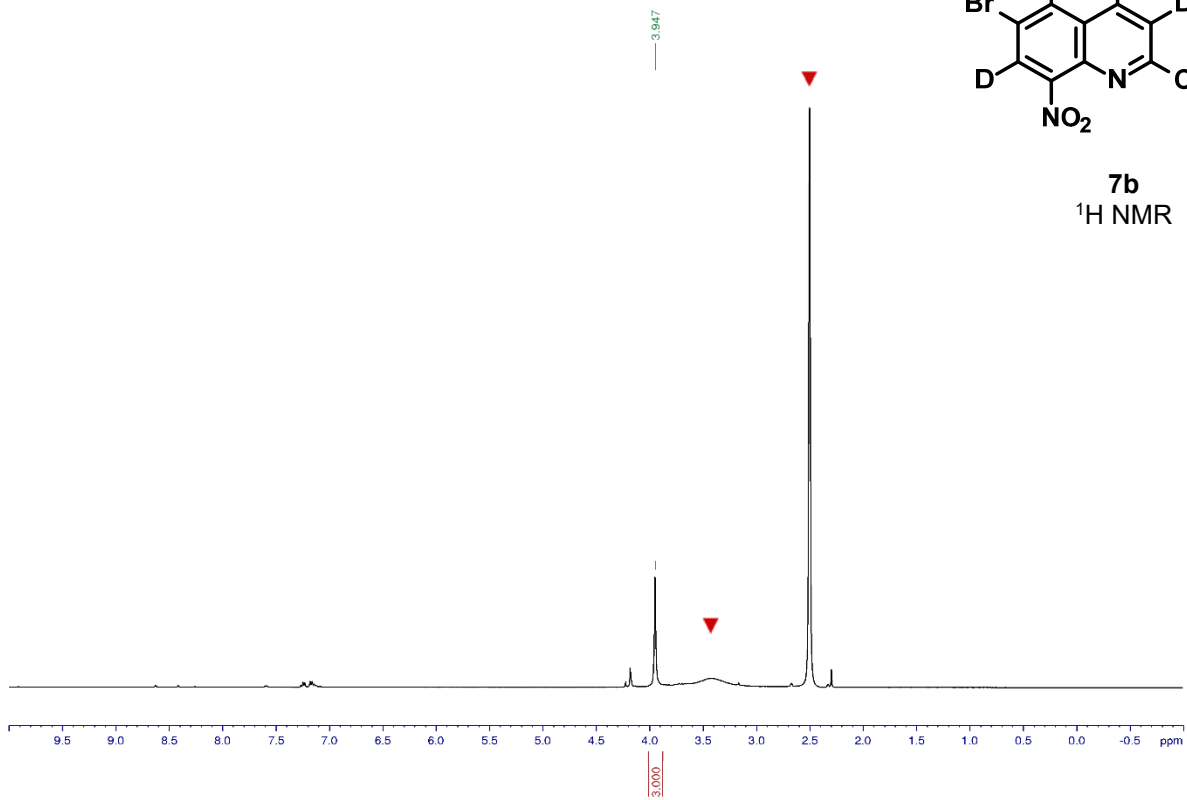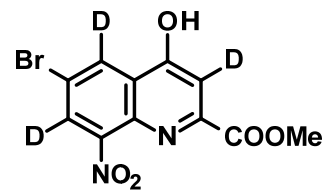

7b  
<sup>1</sup>H NMR

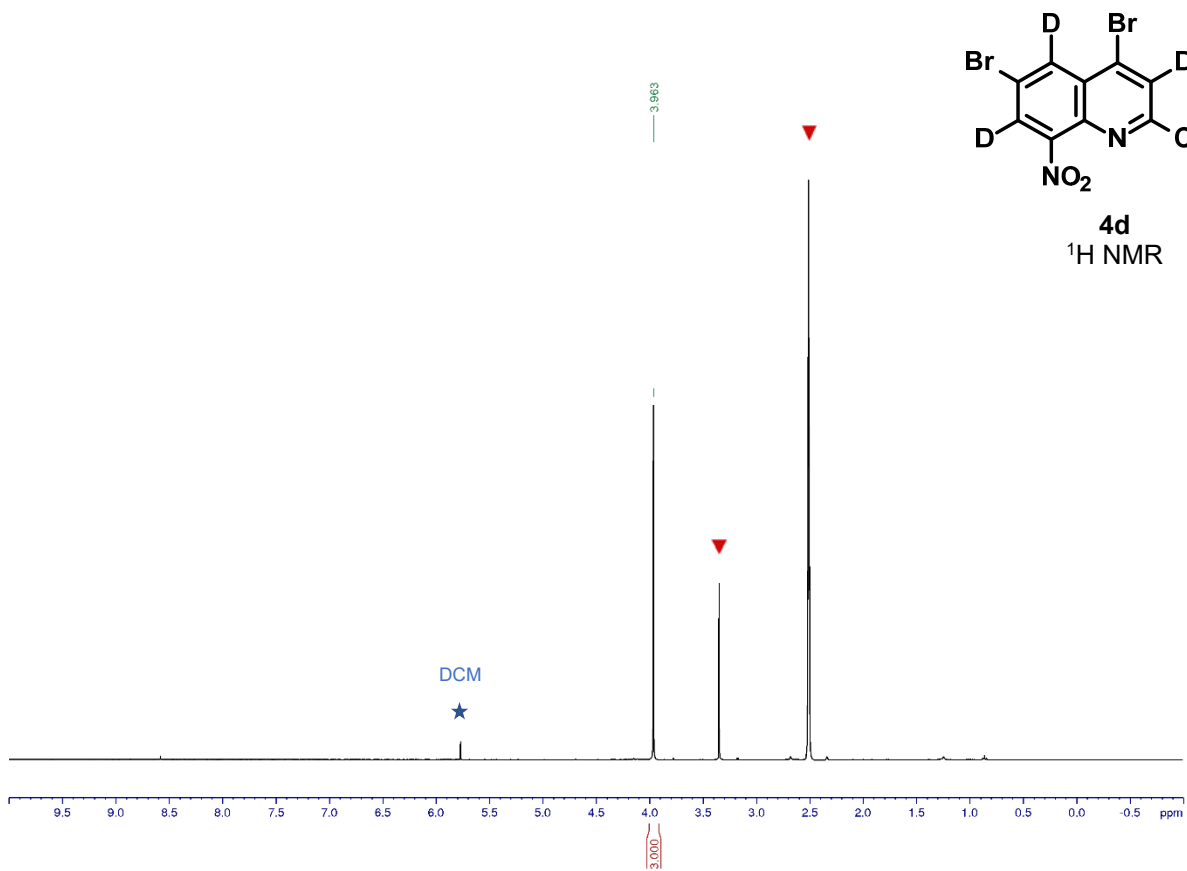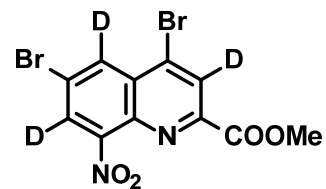

4d  
<sup>1</sup>H NMR

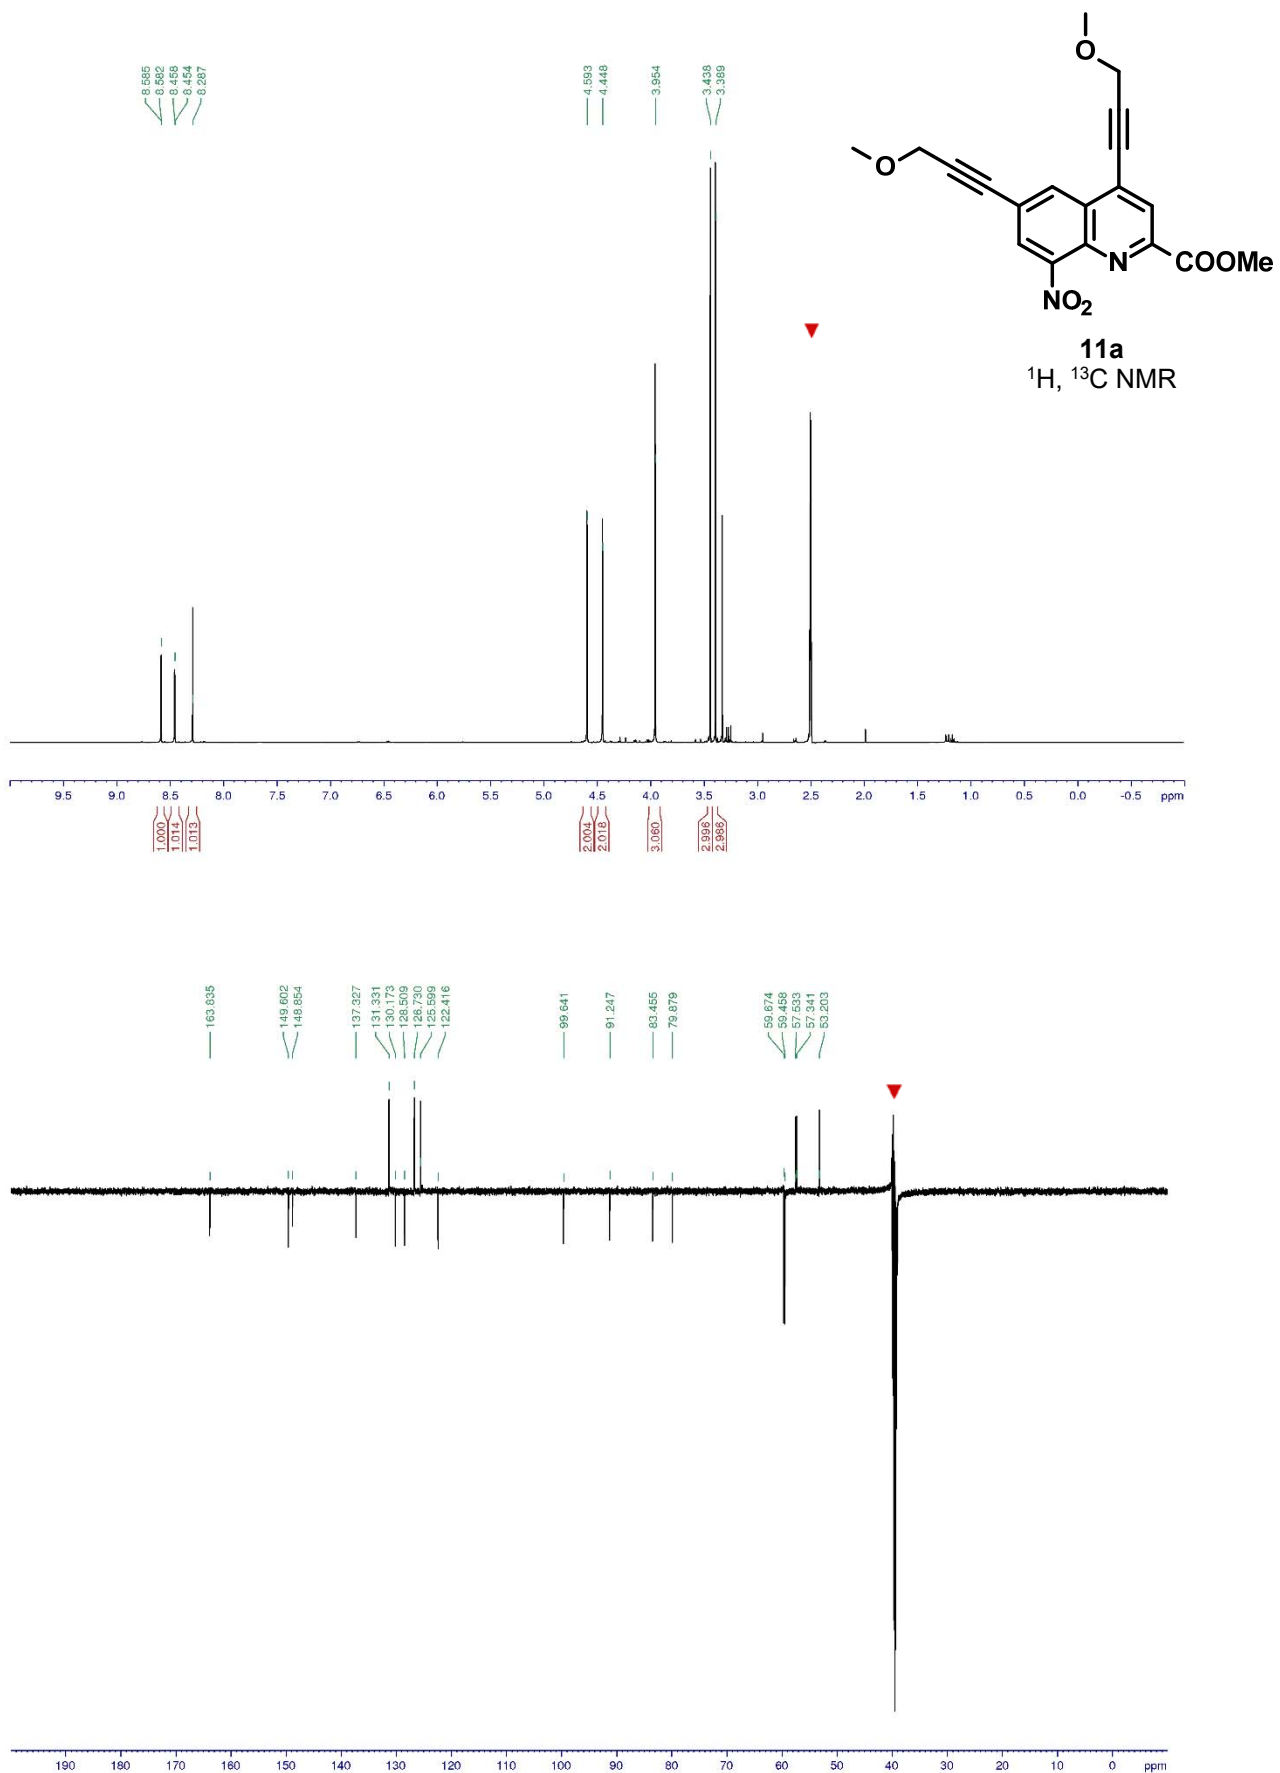

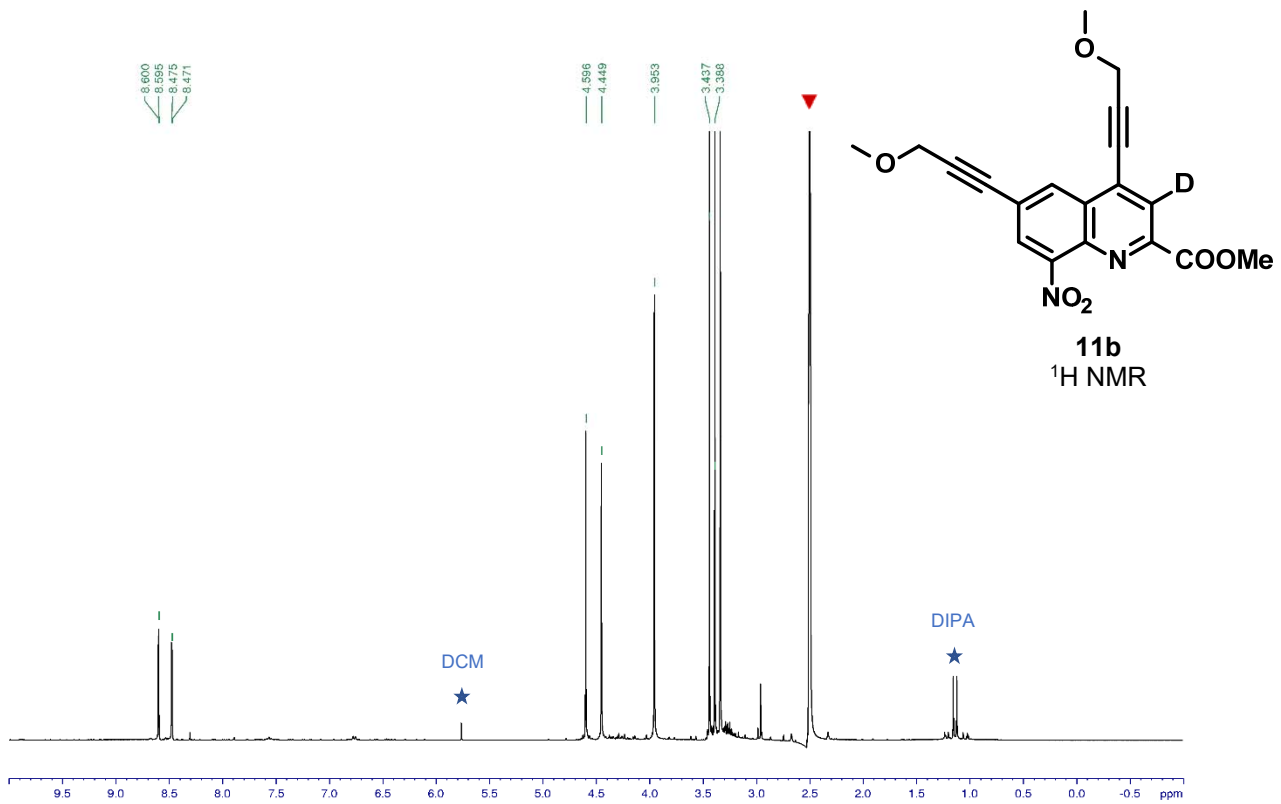

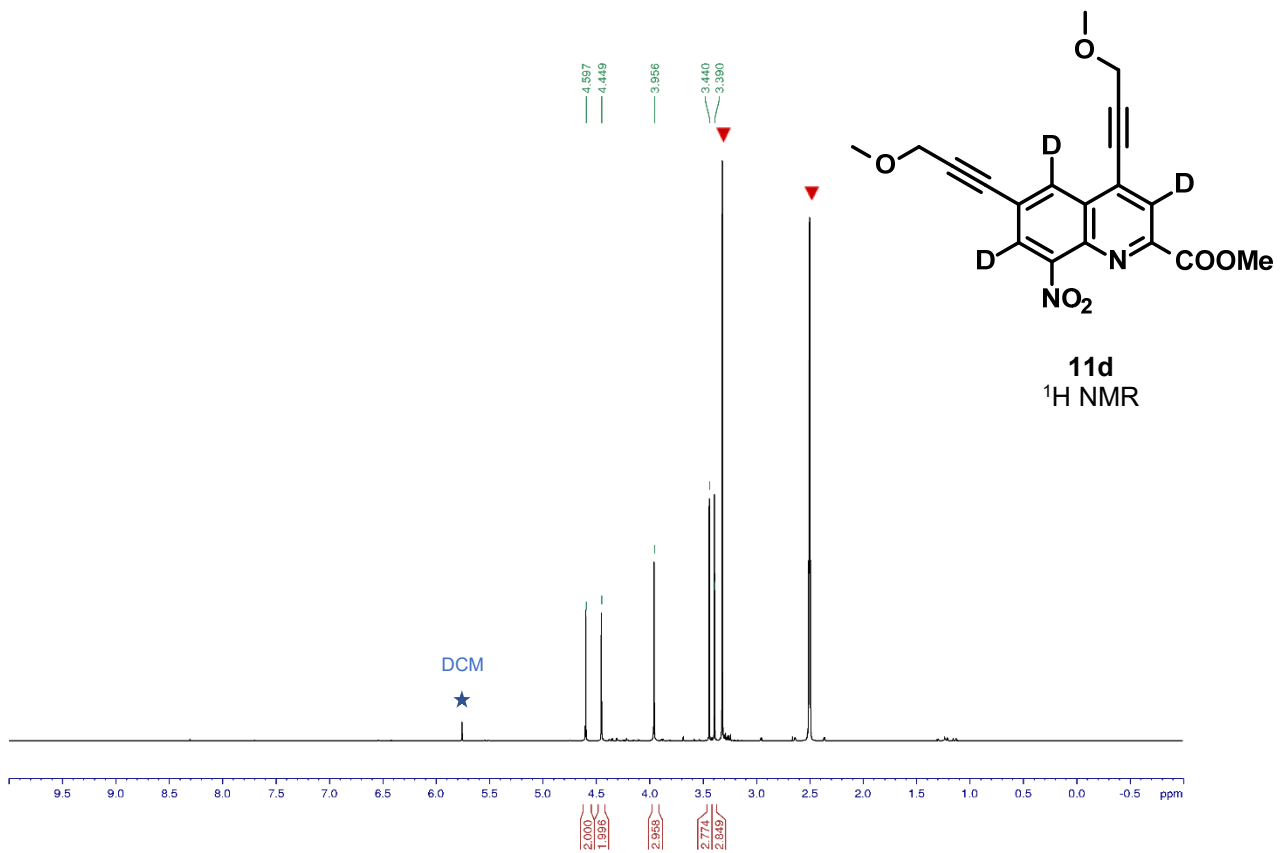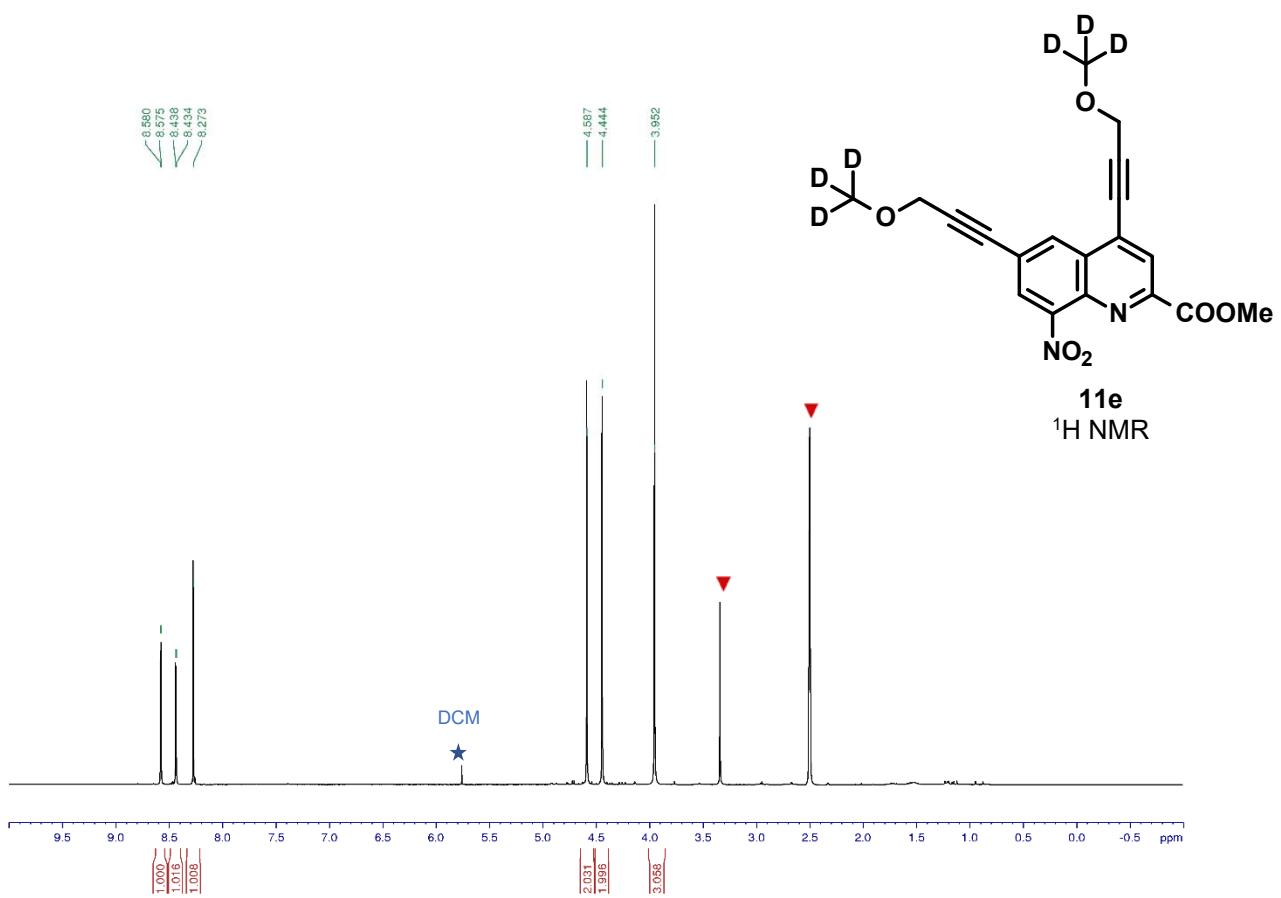

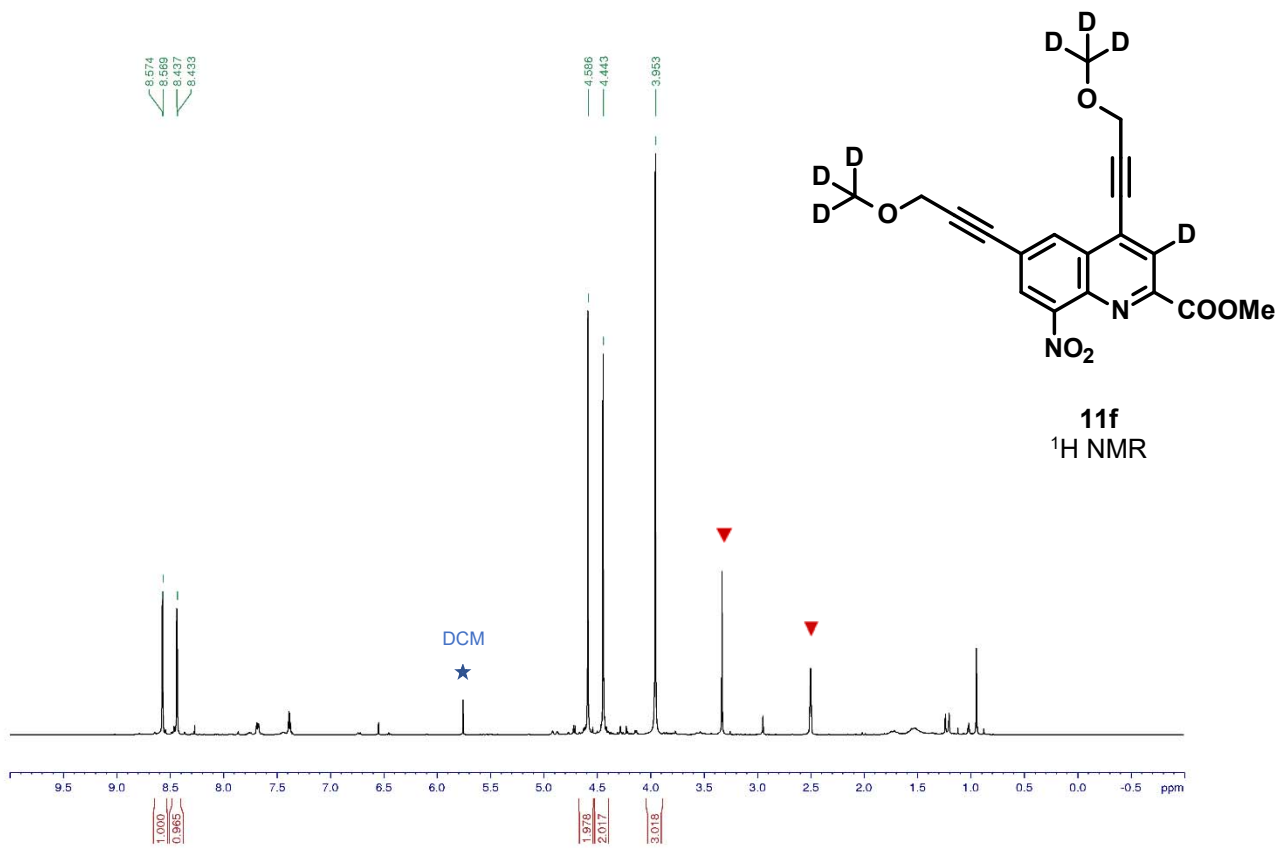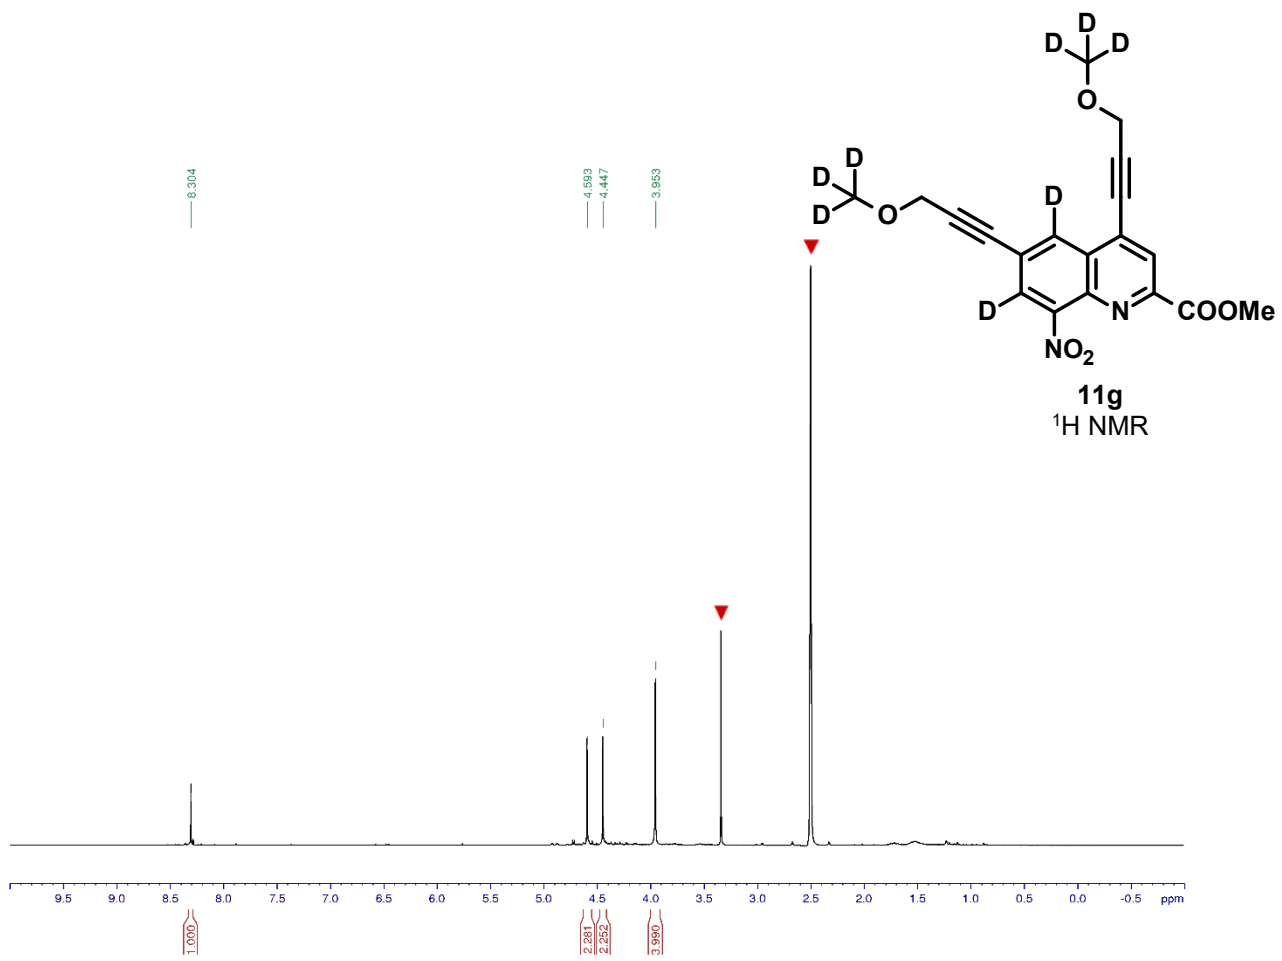

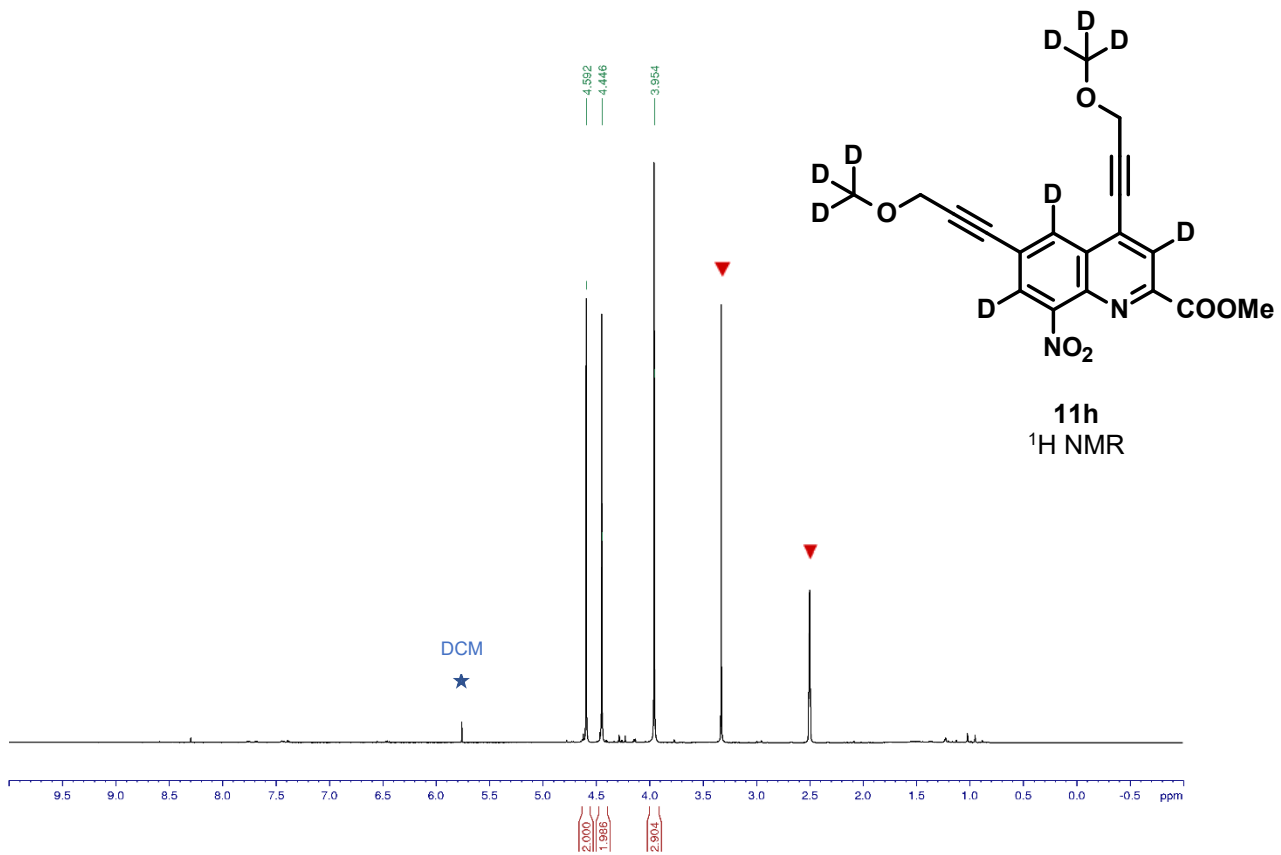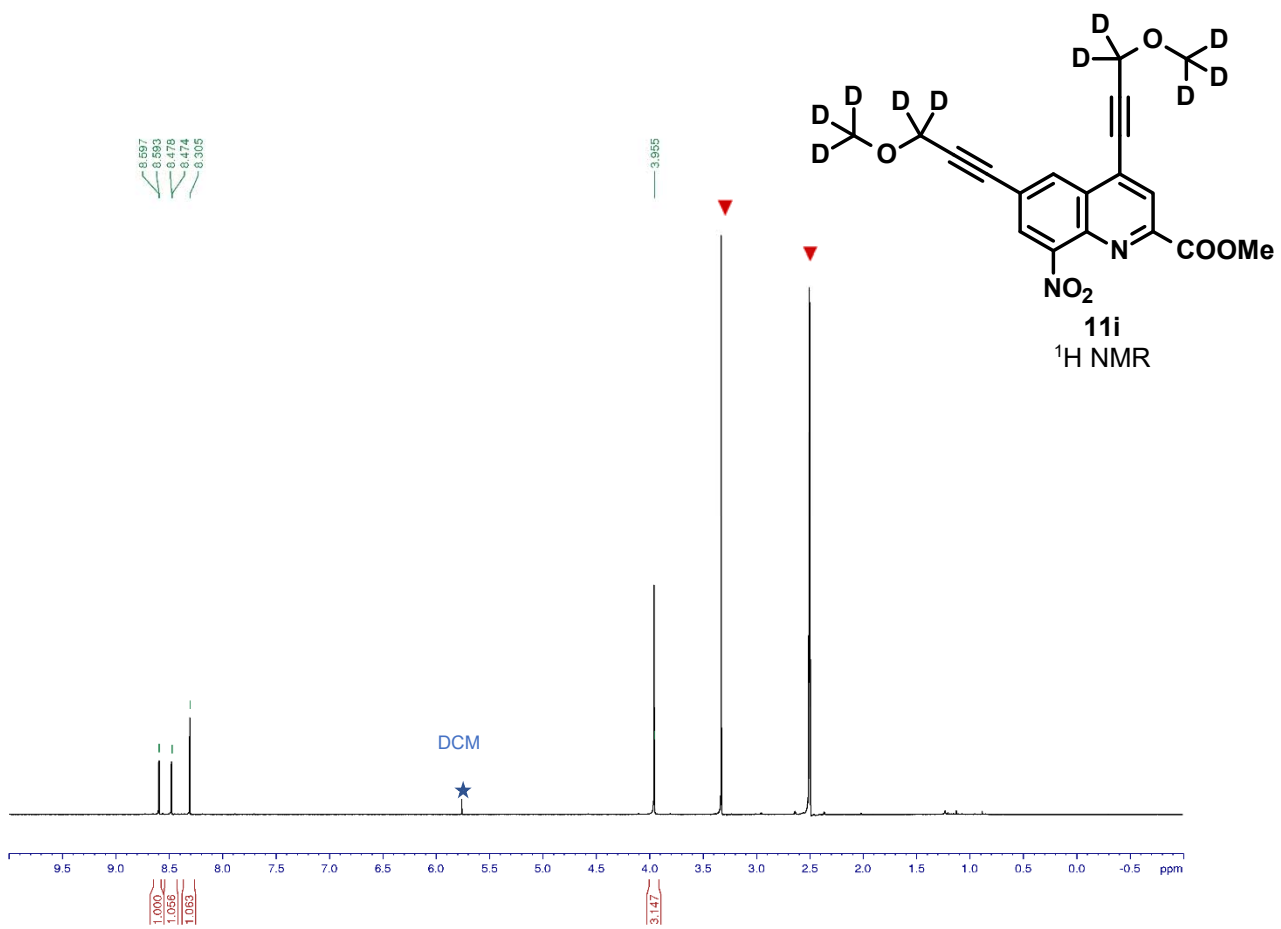

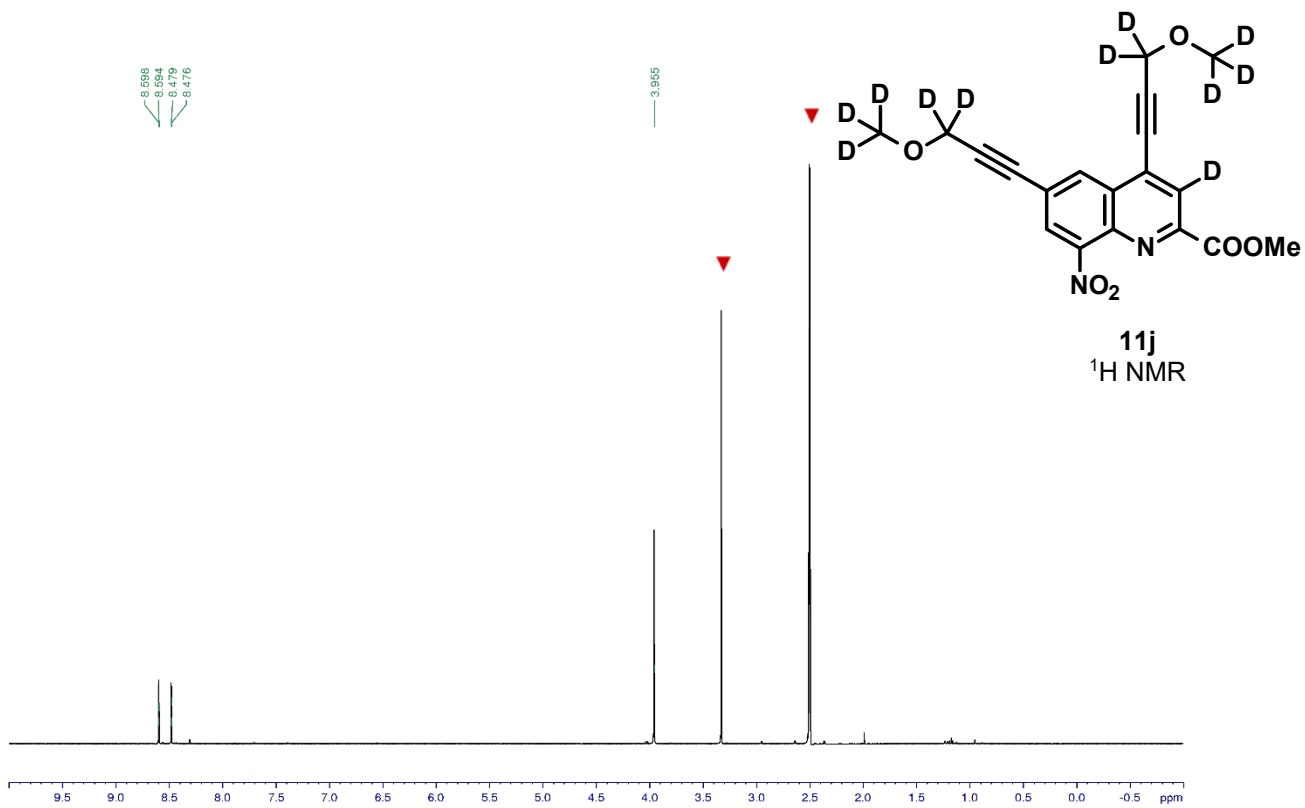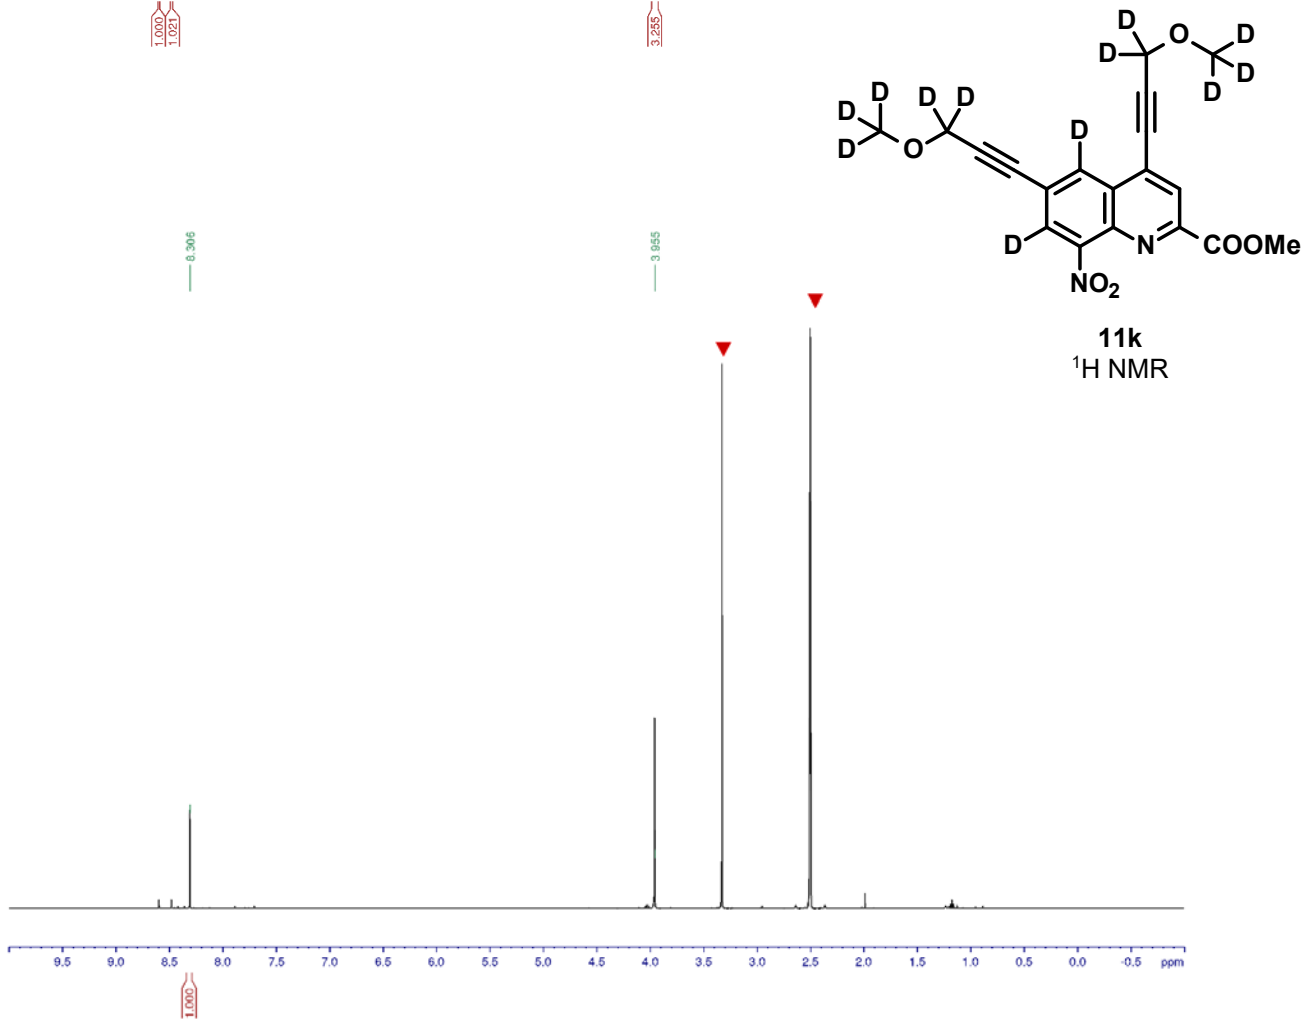

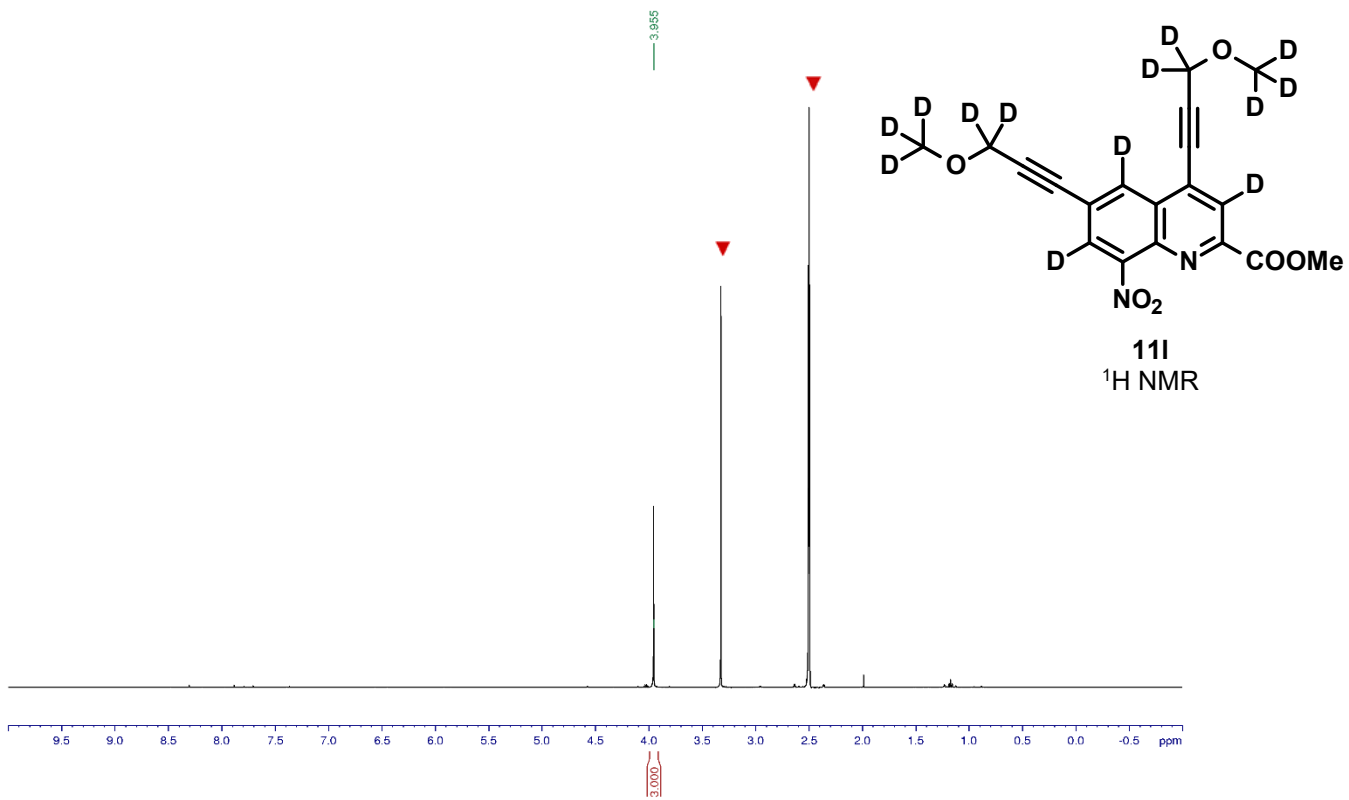



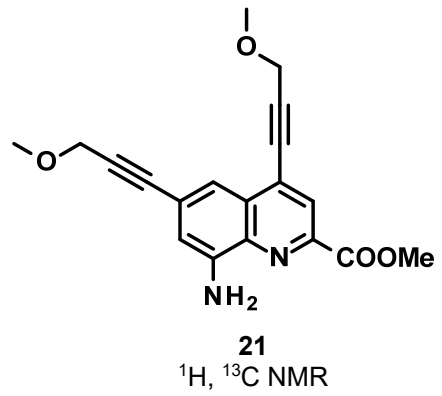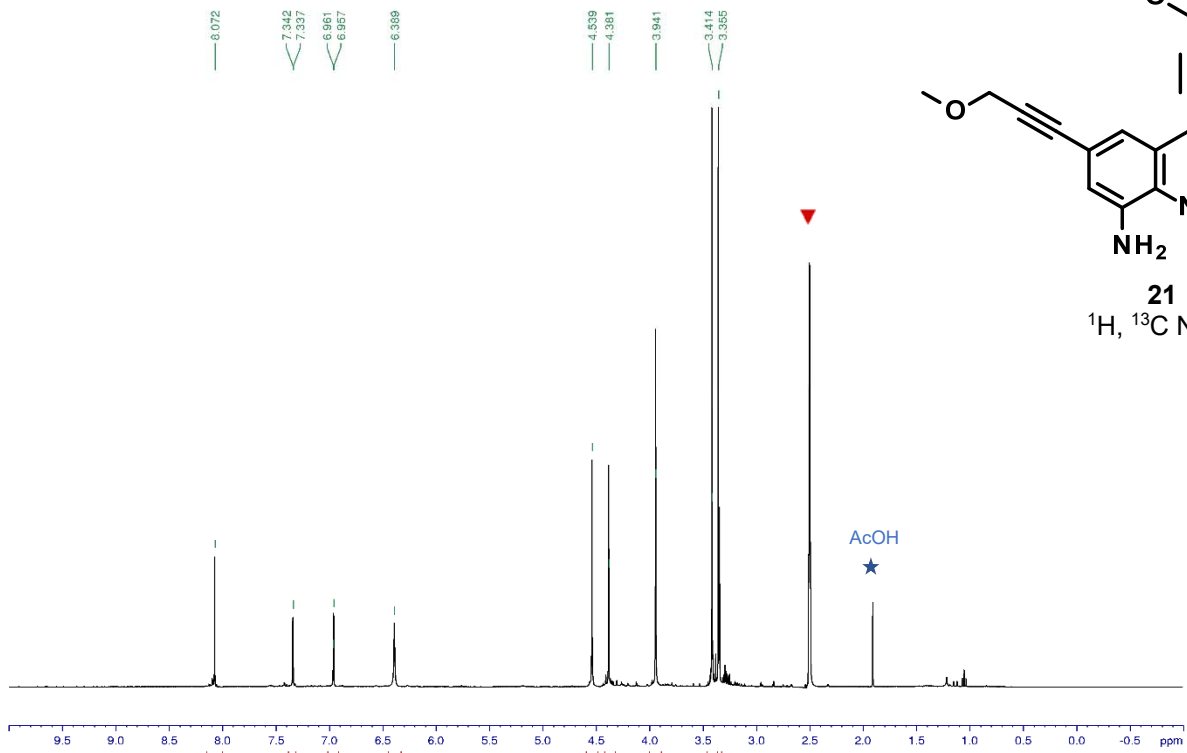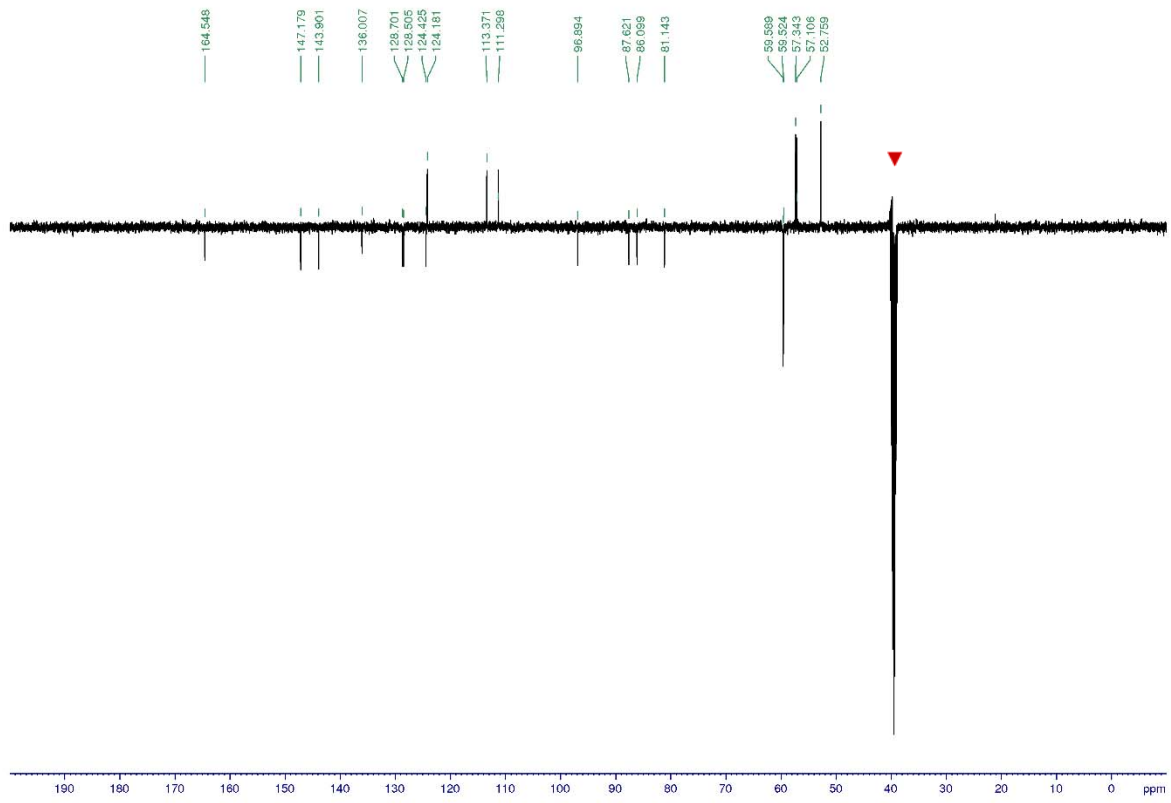

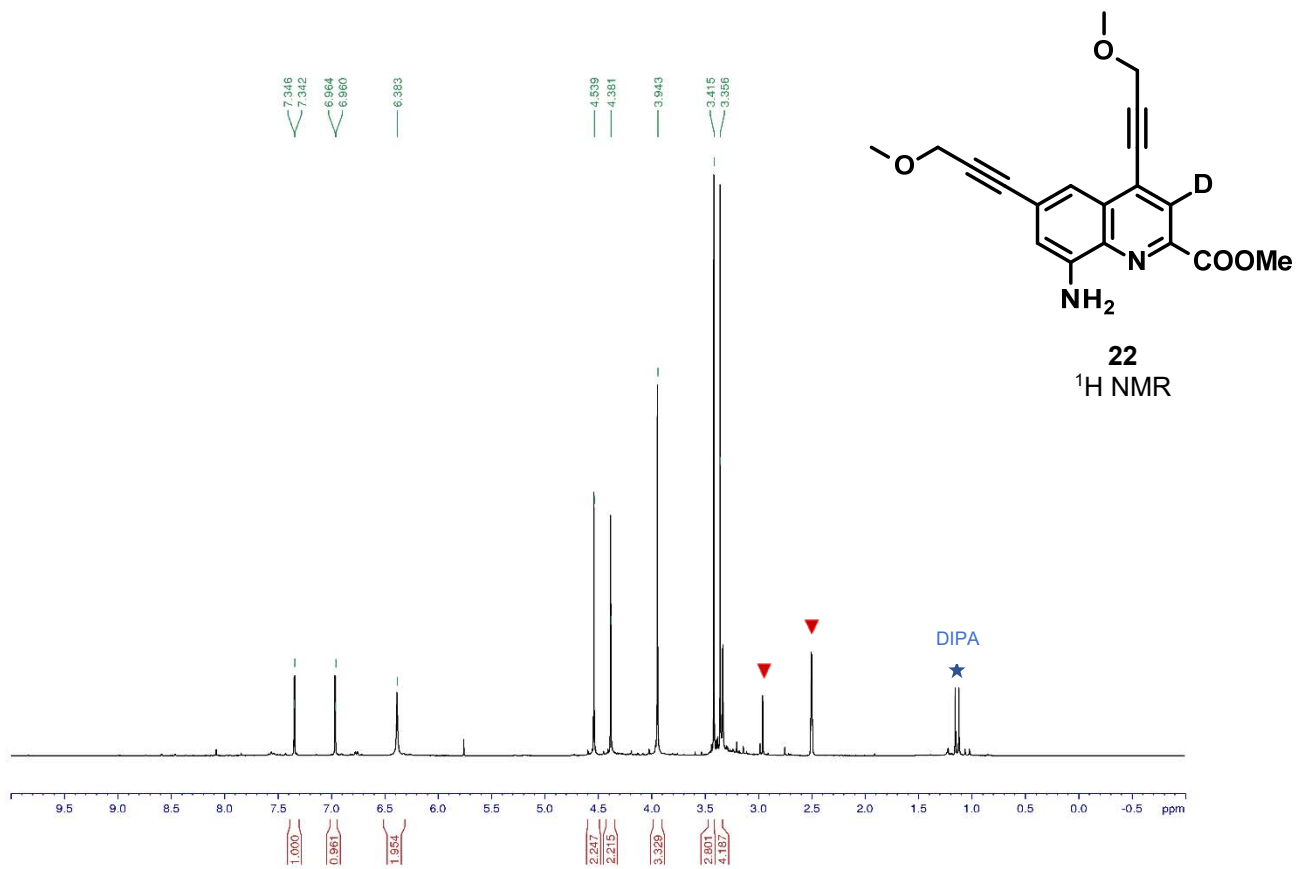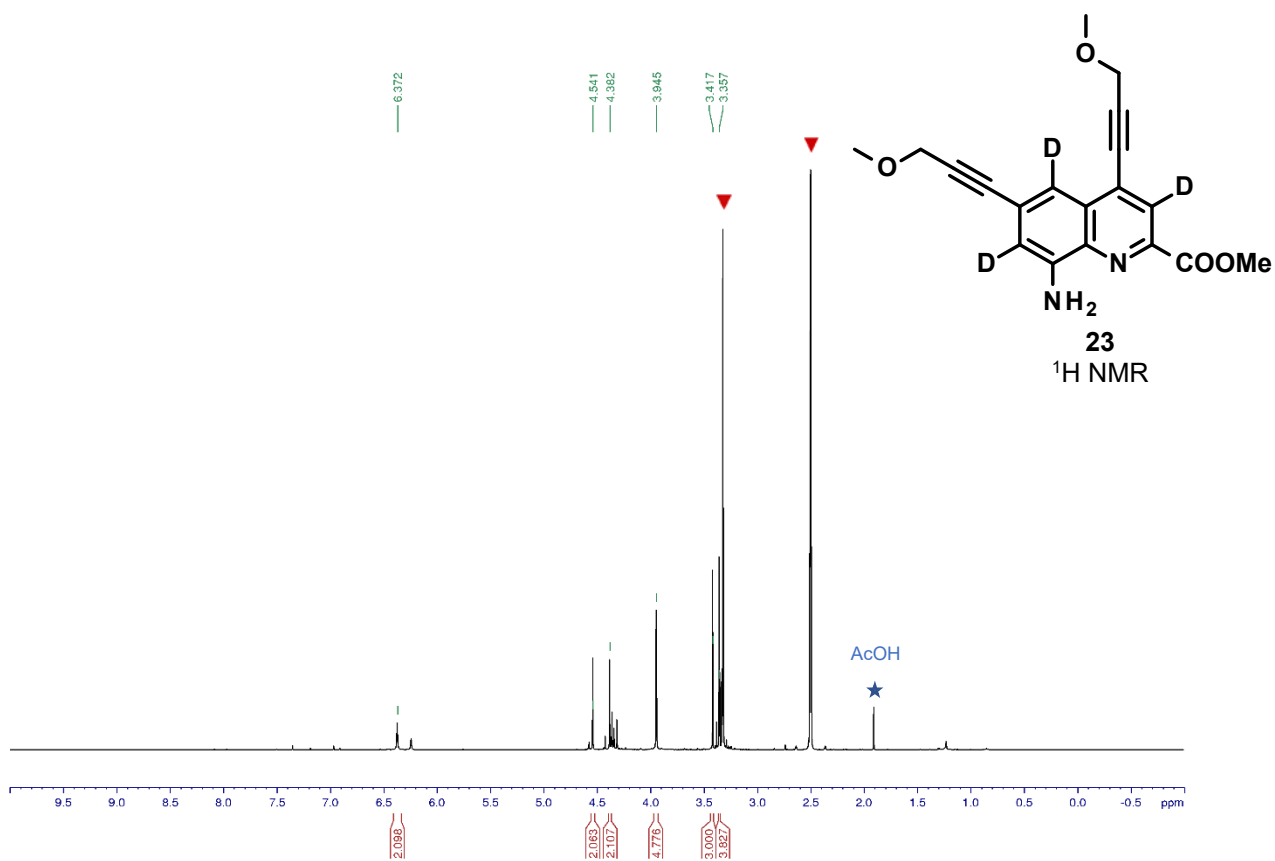

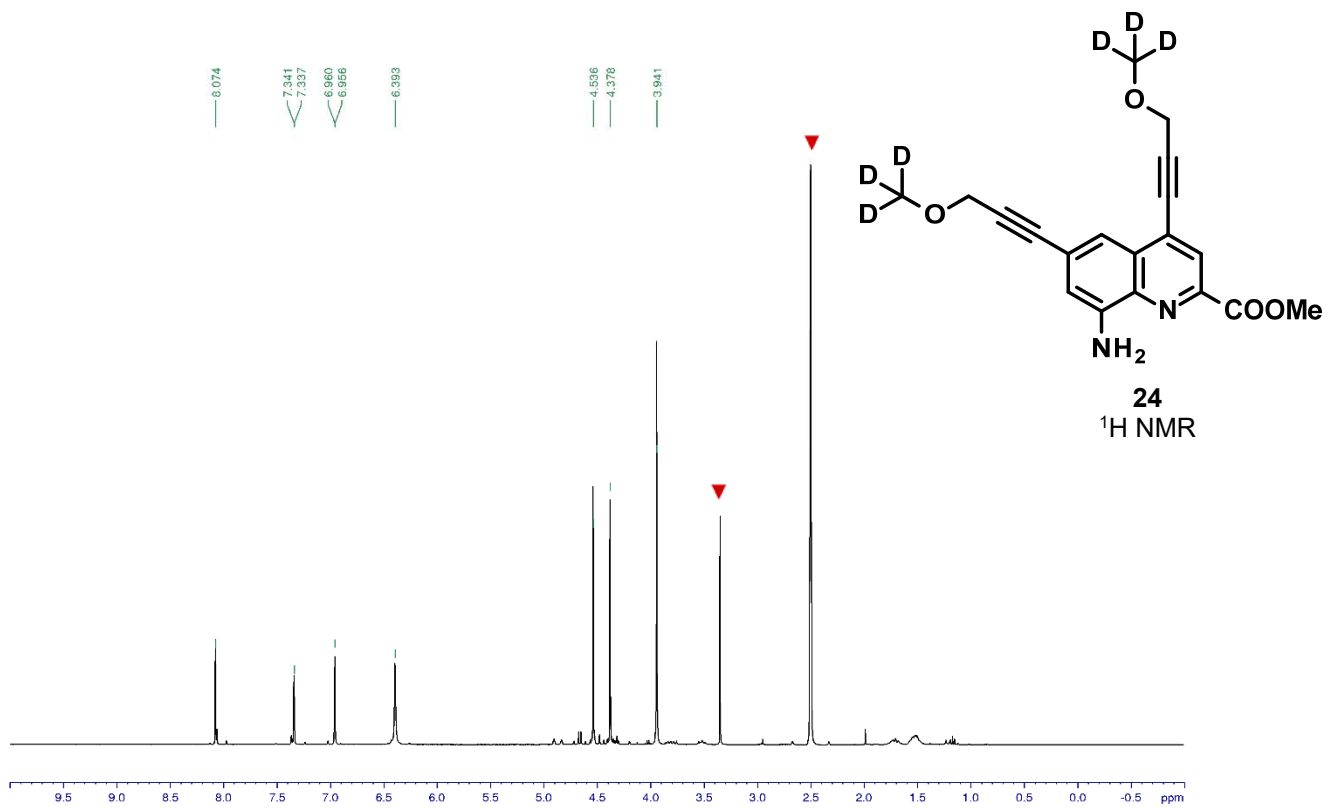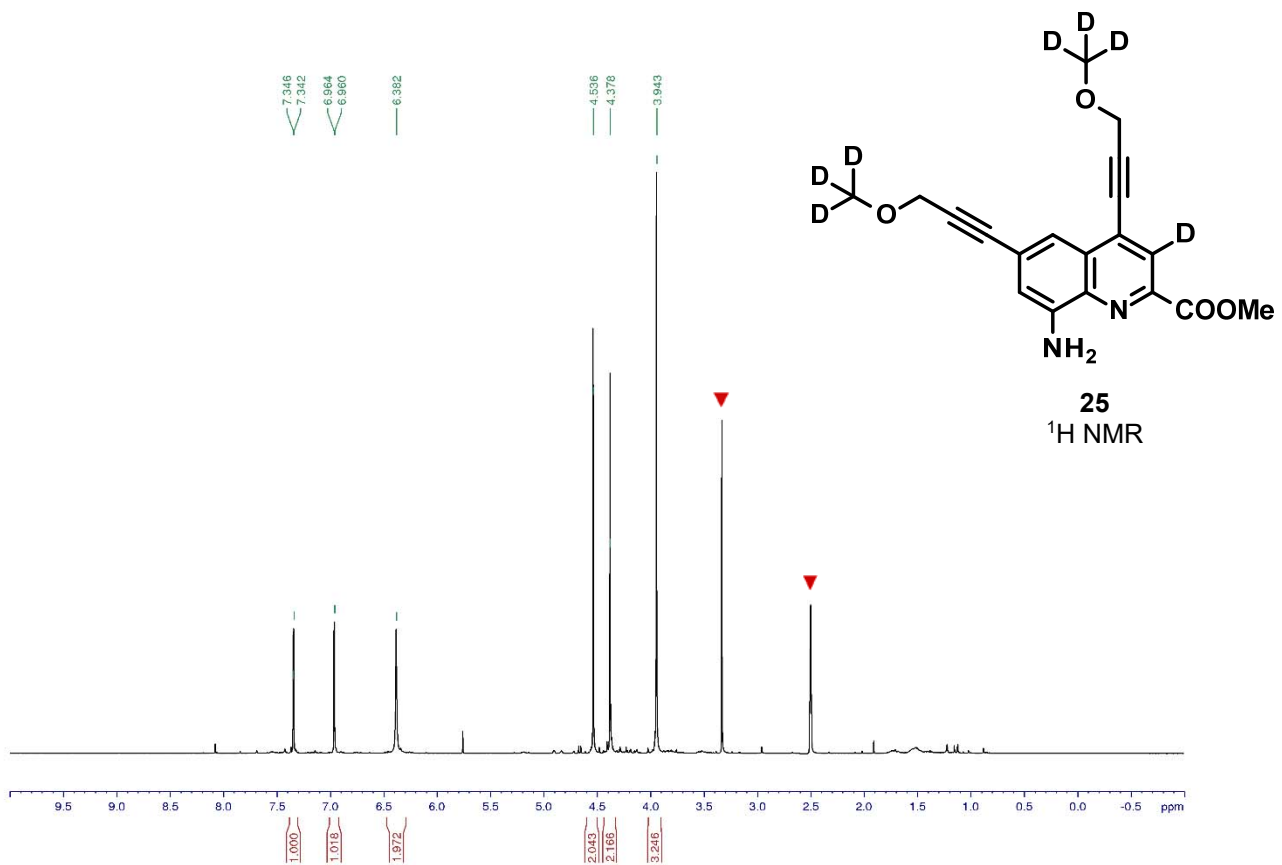

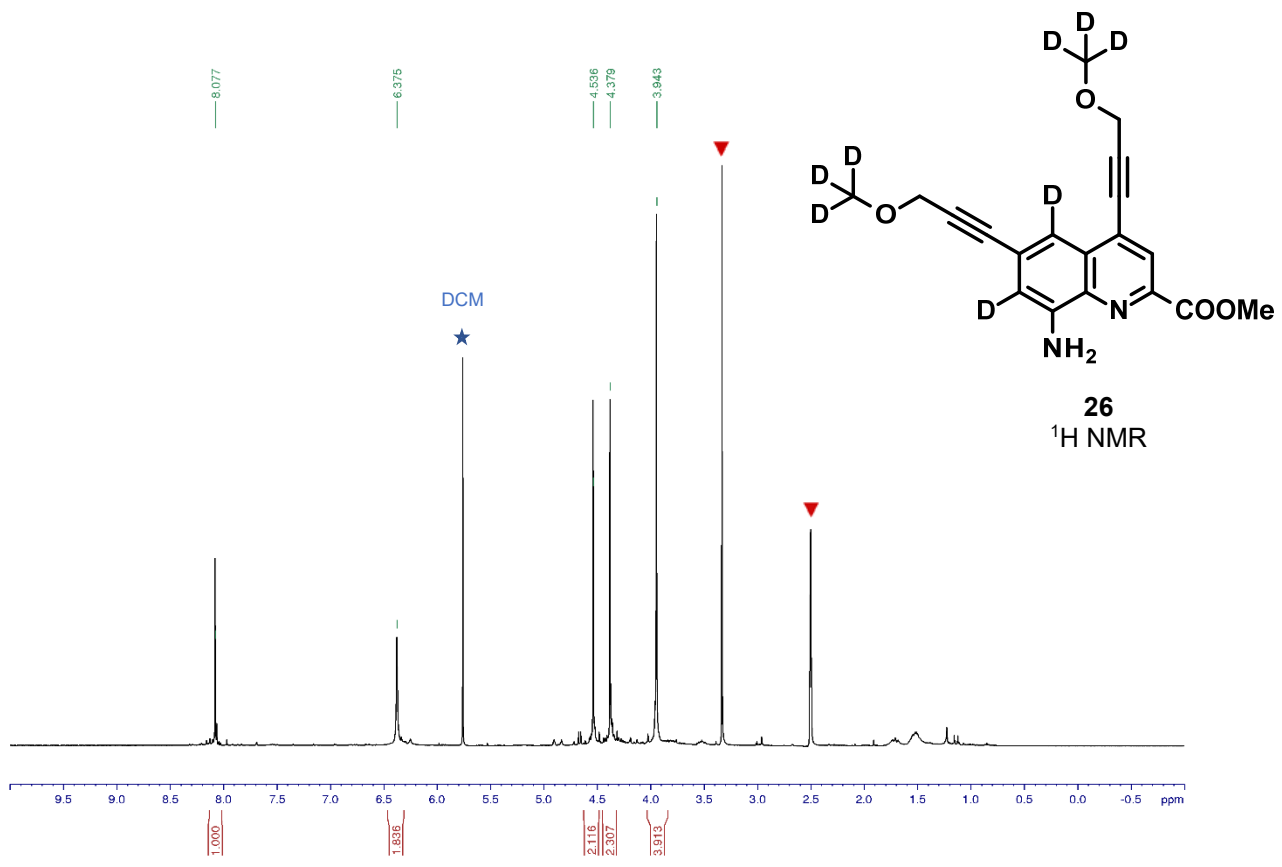

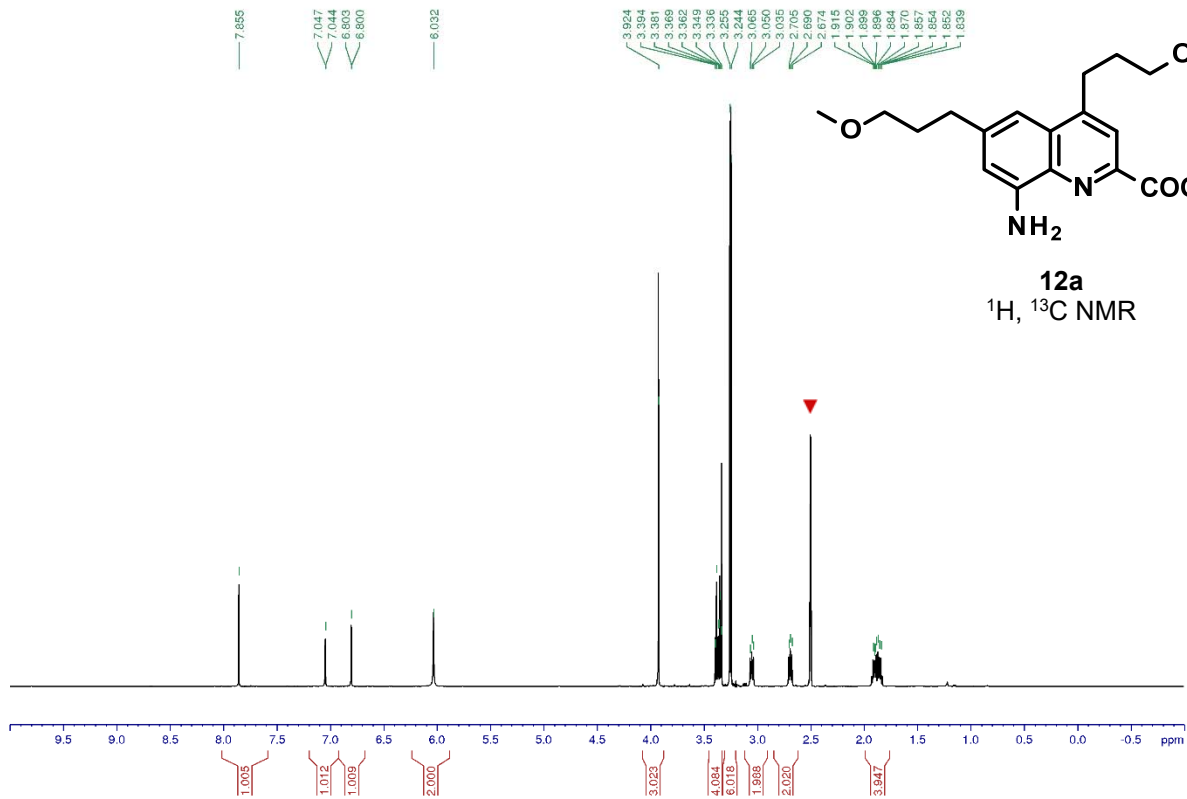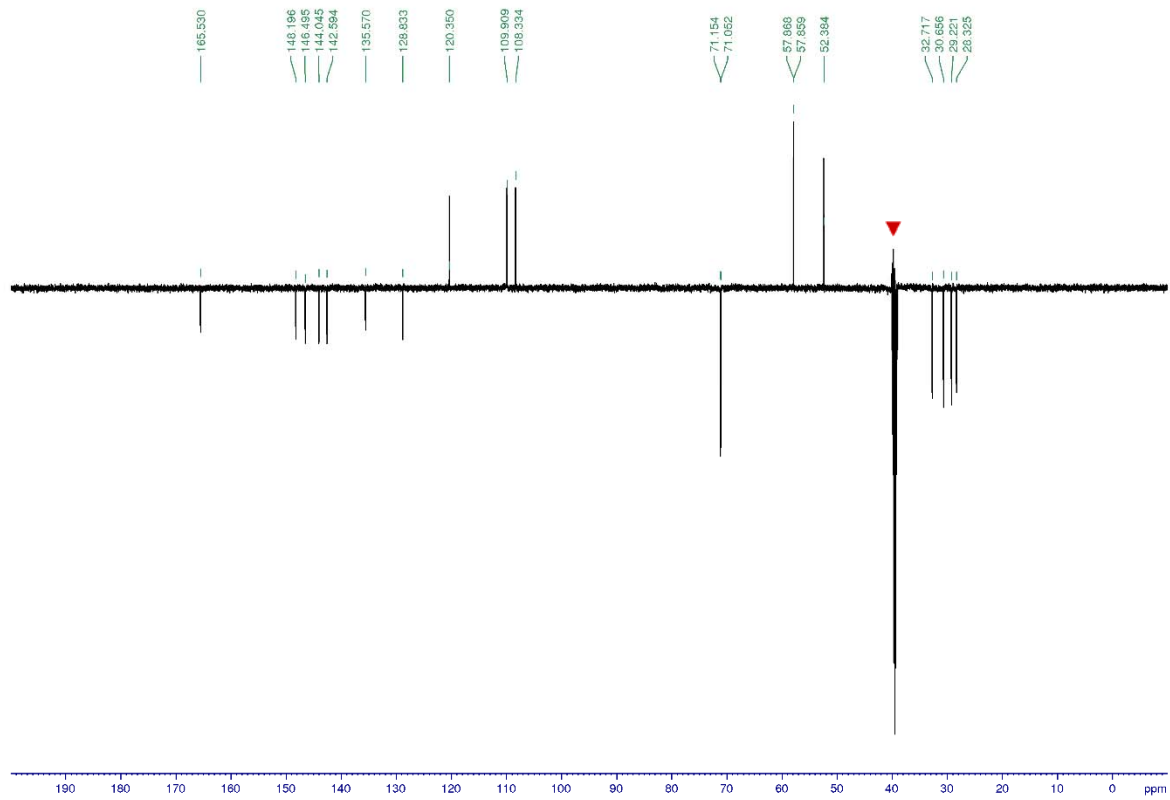

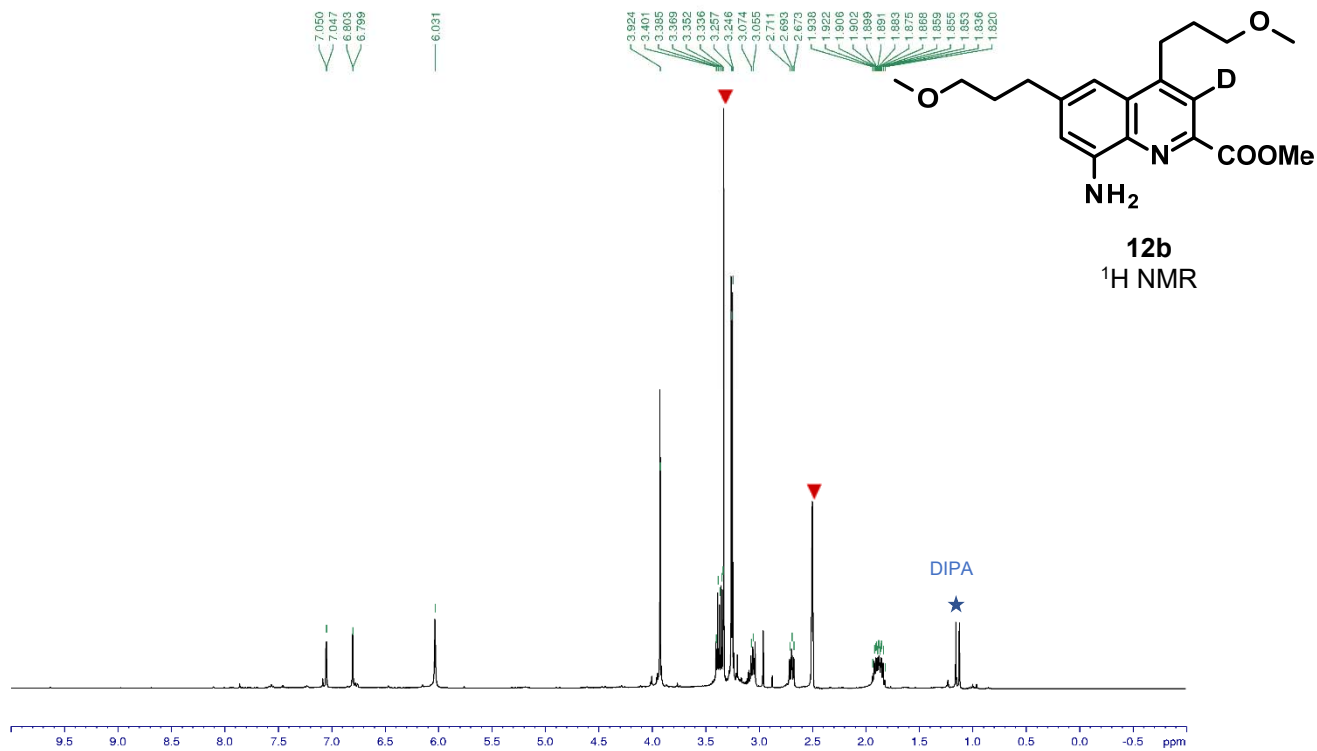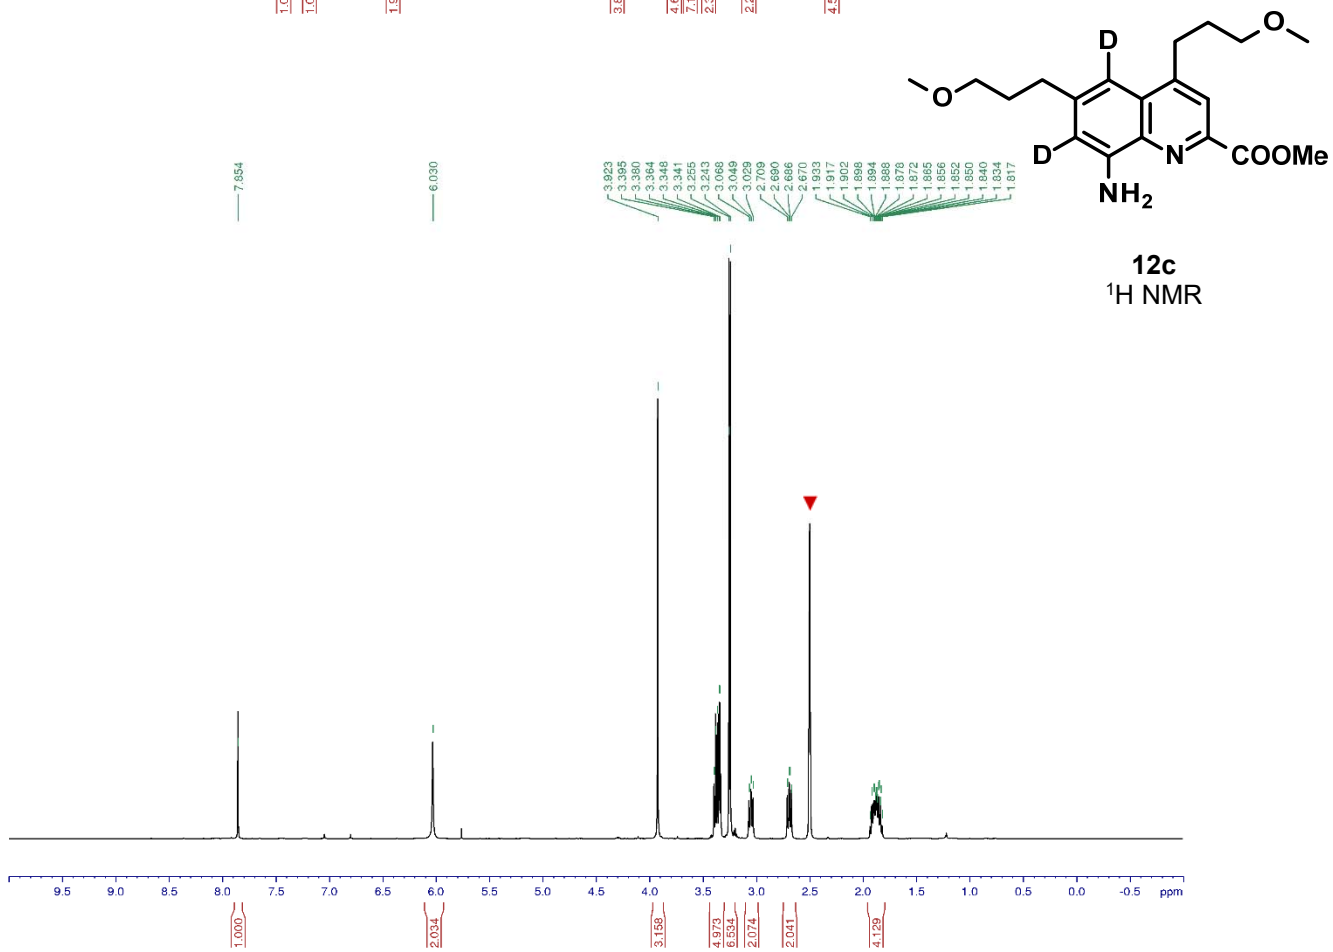

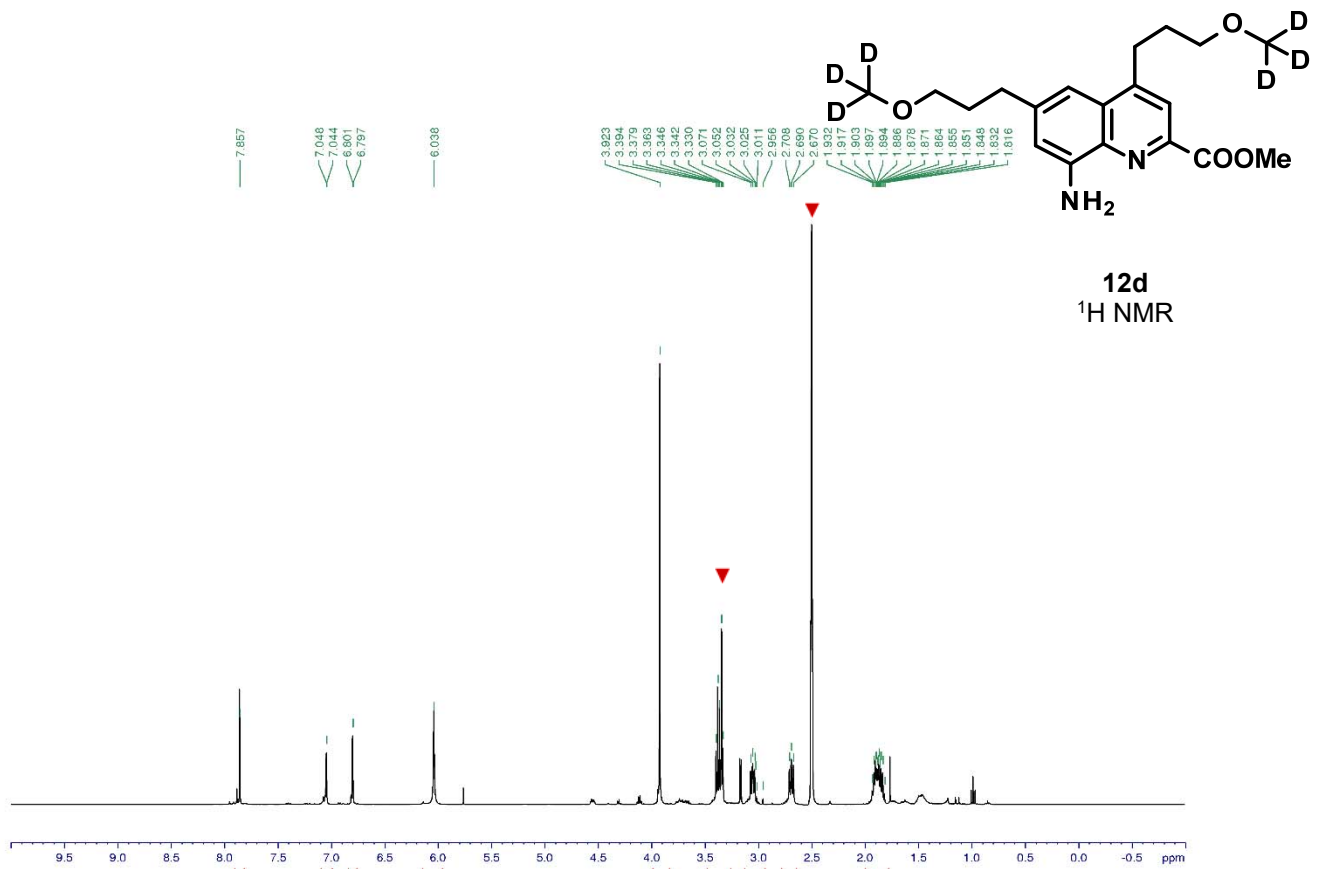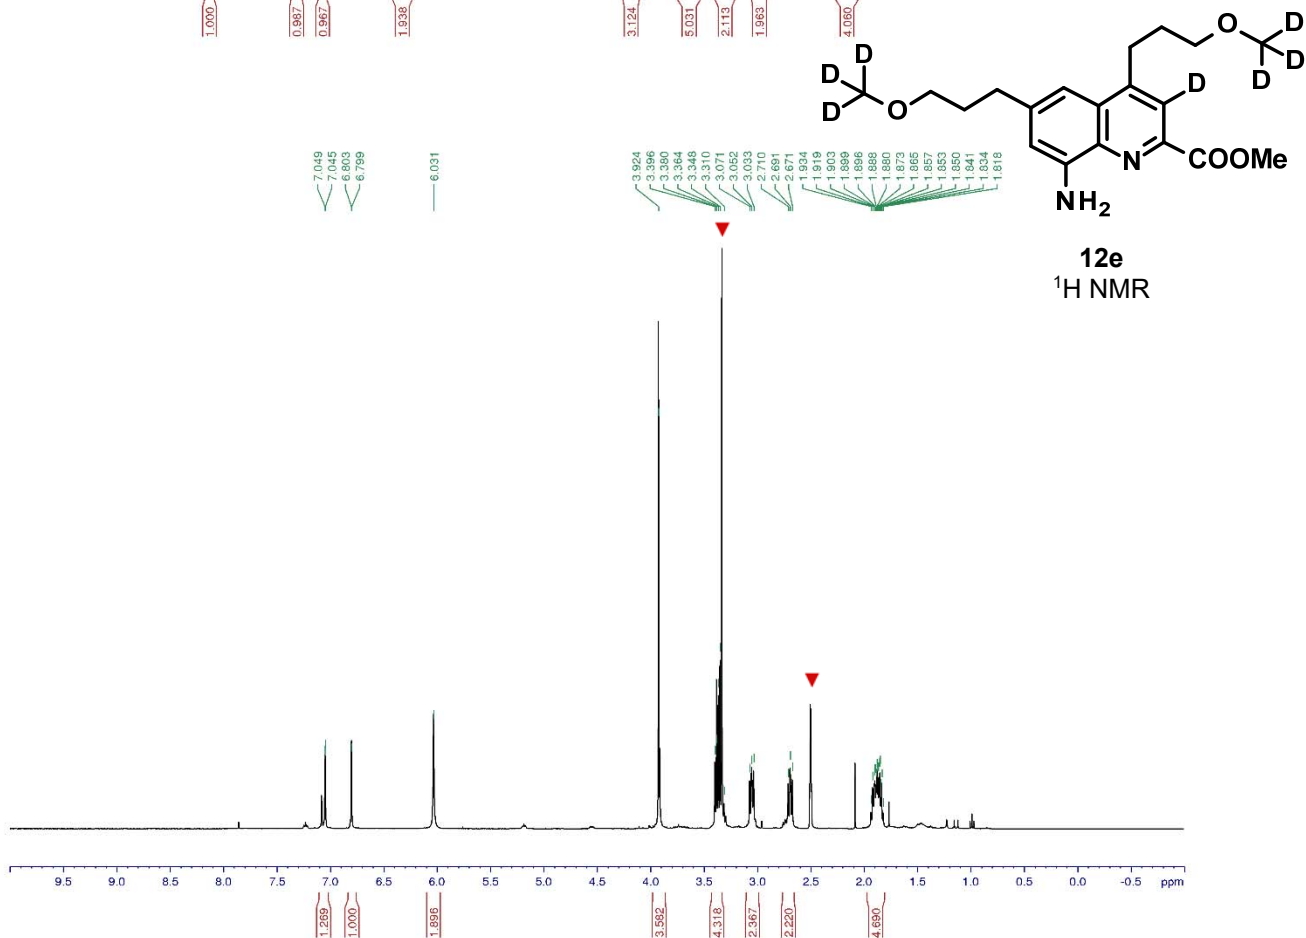

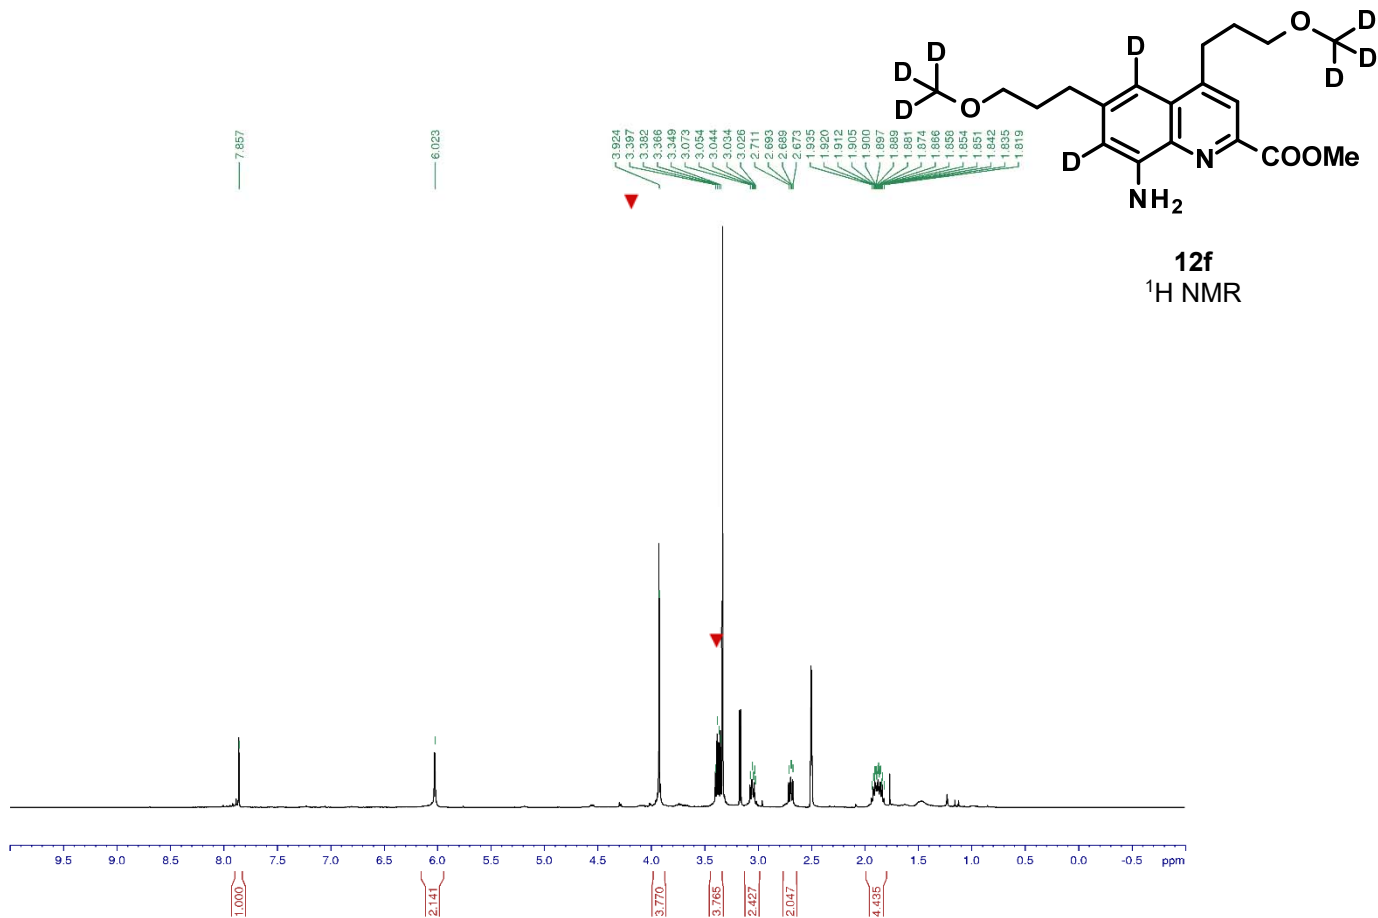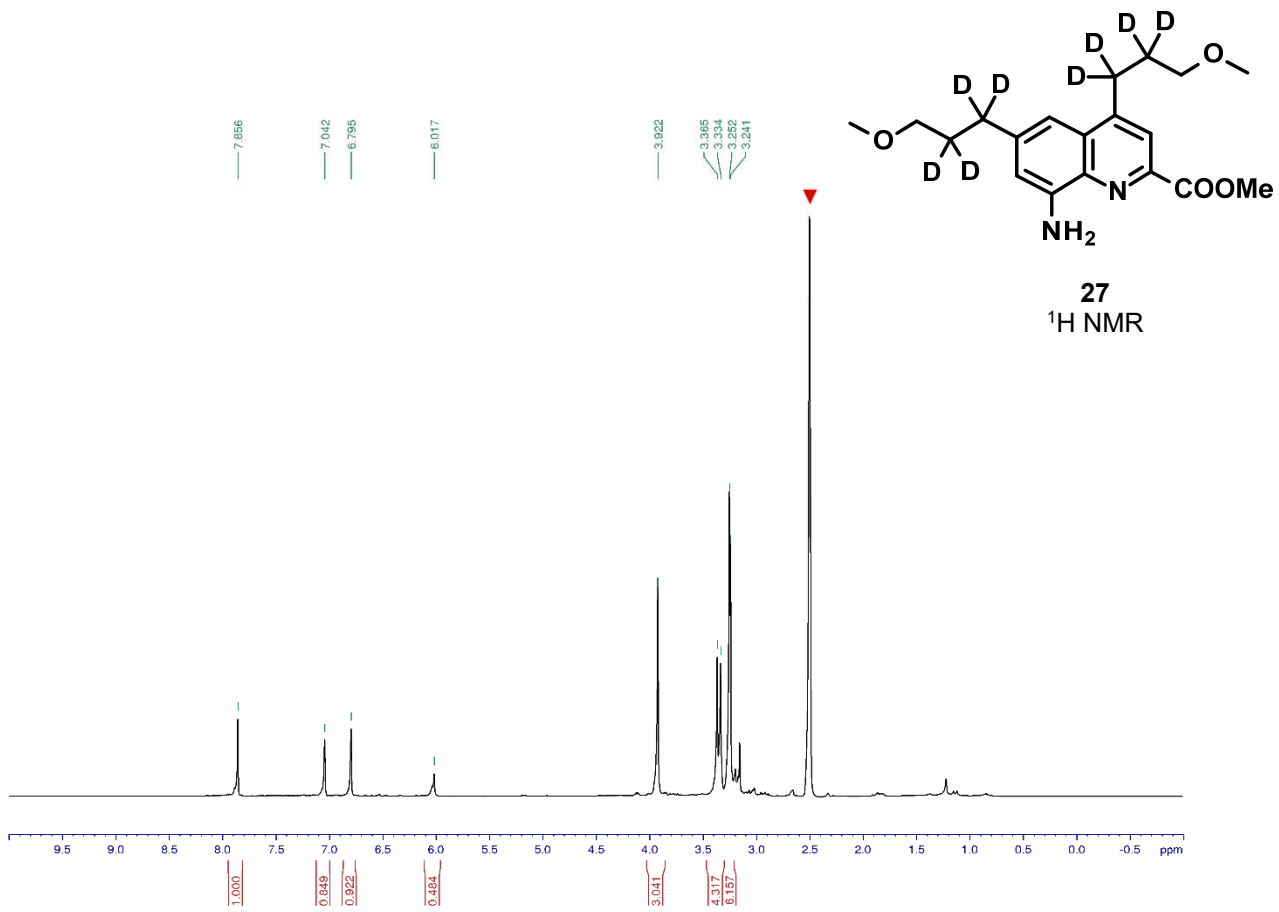



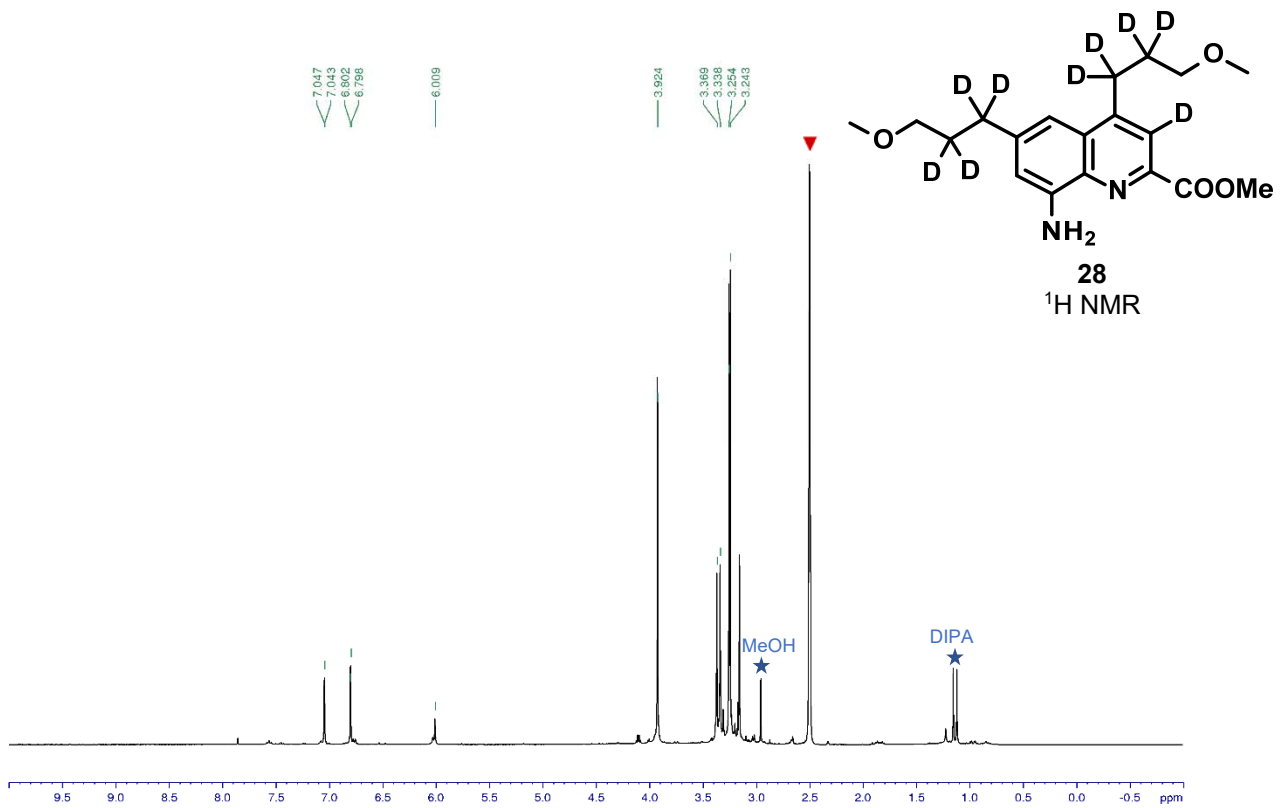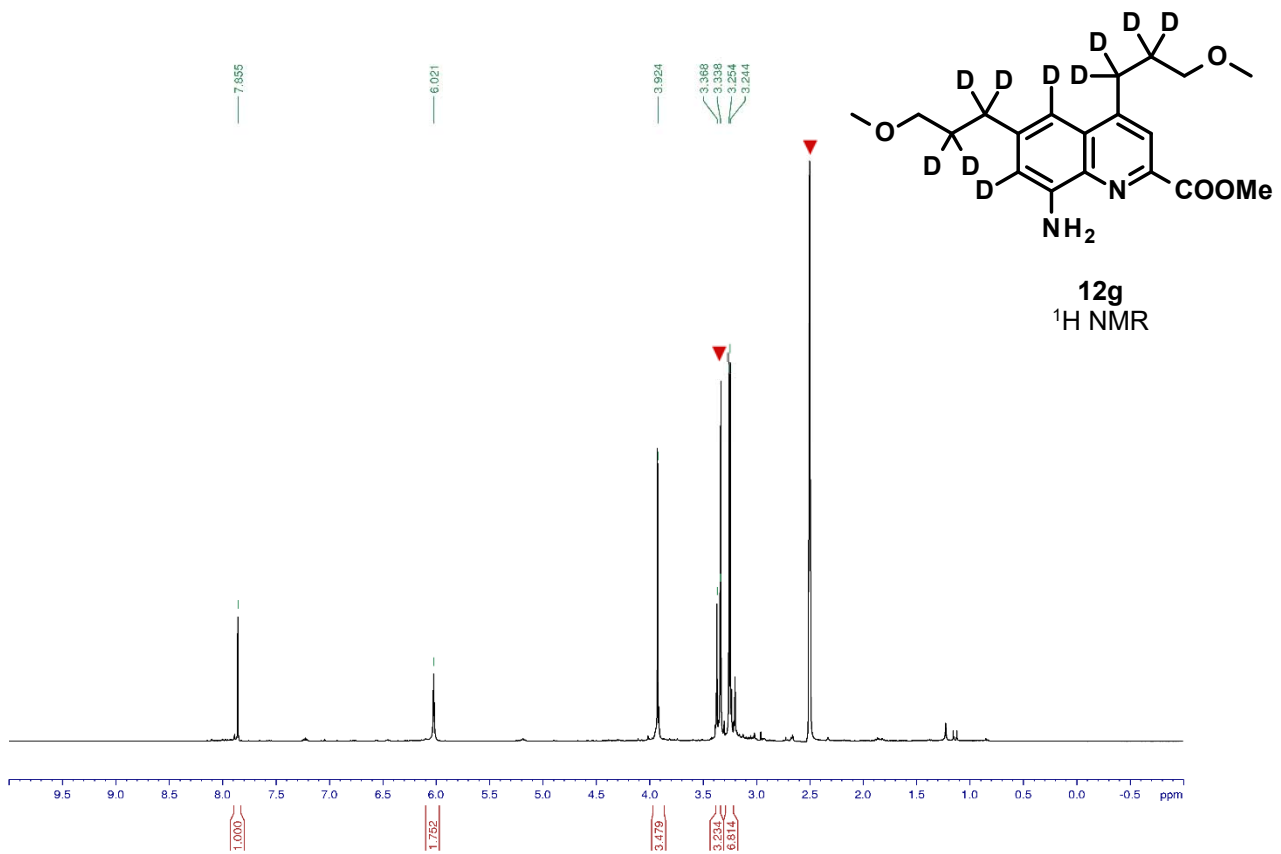

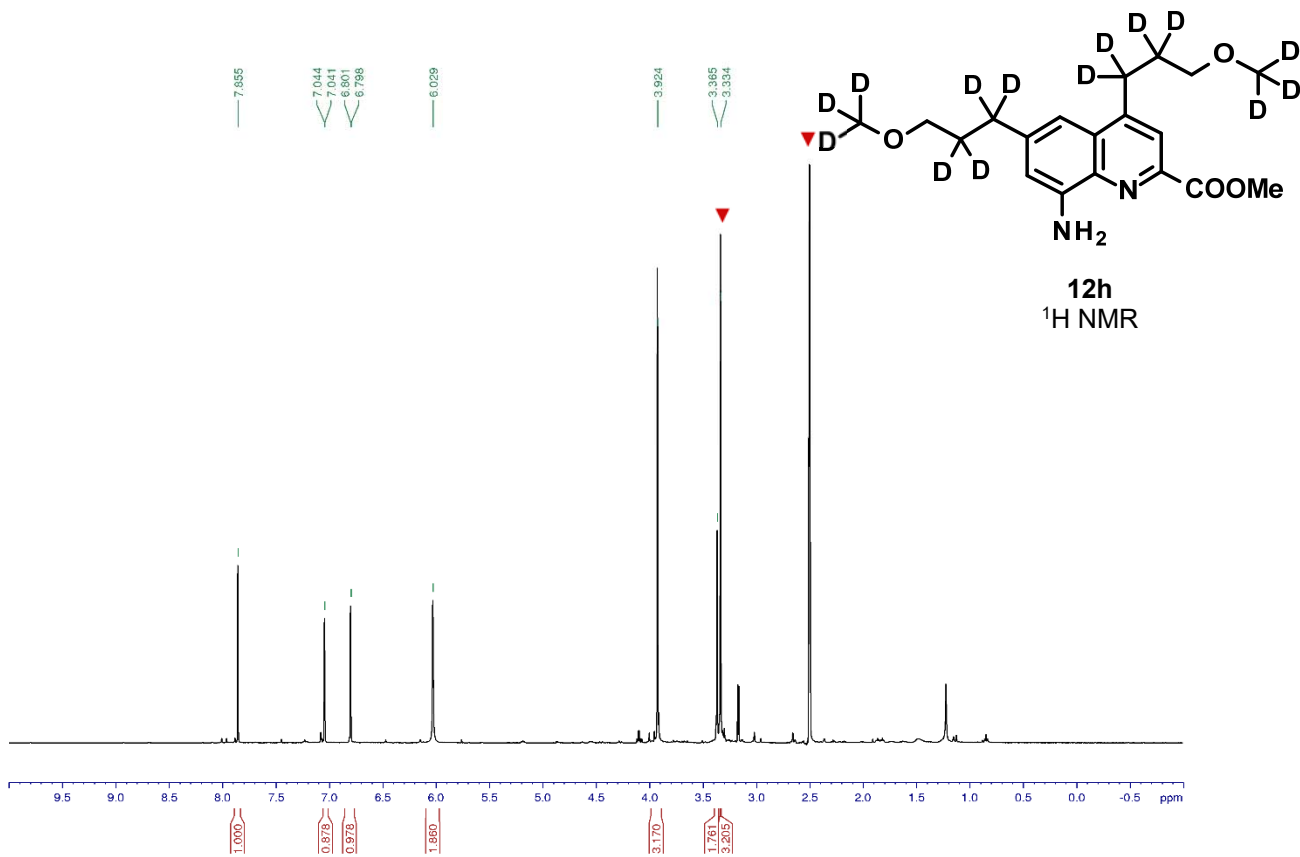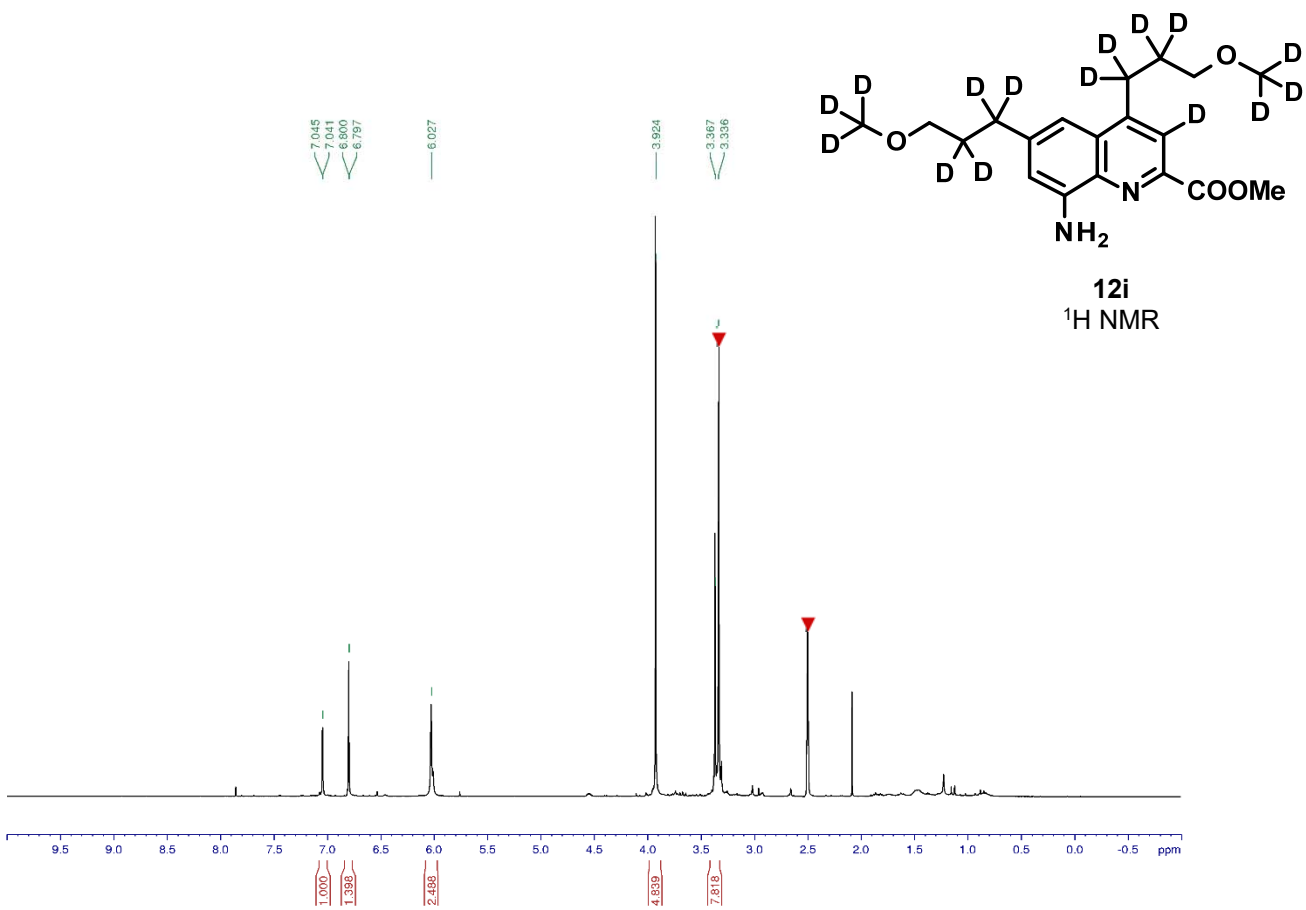

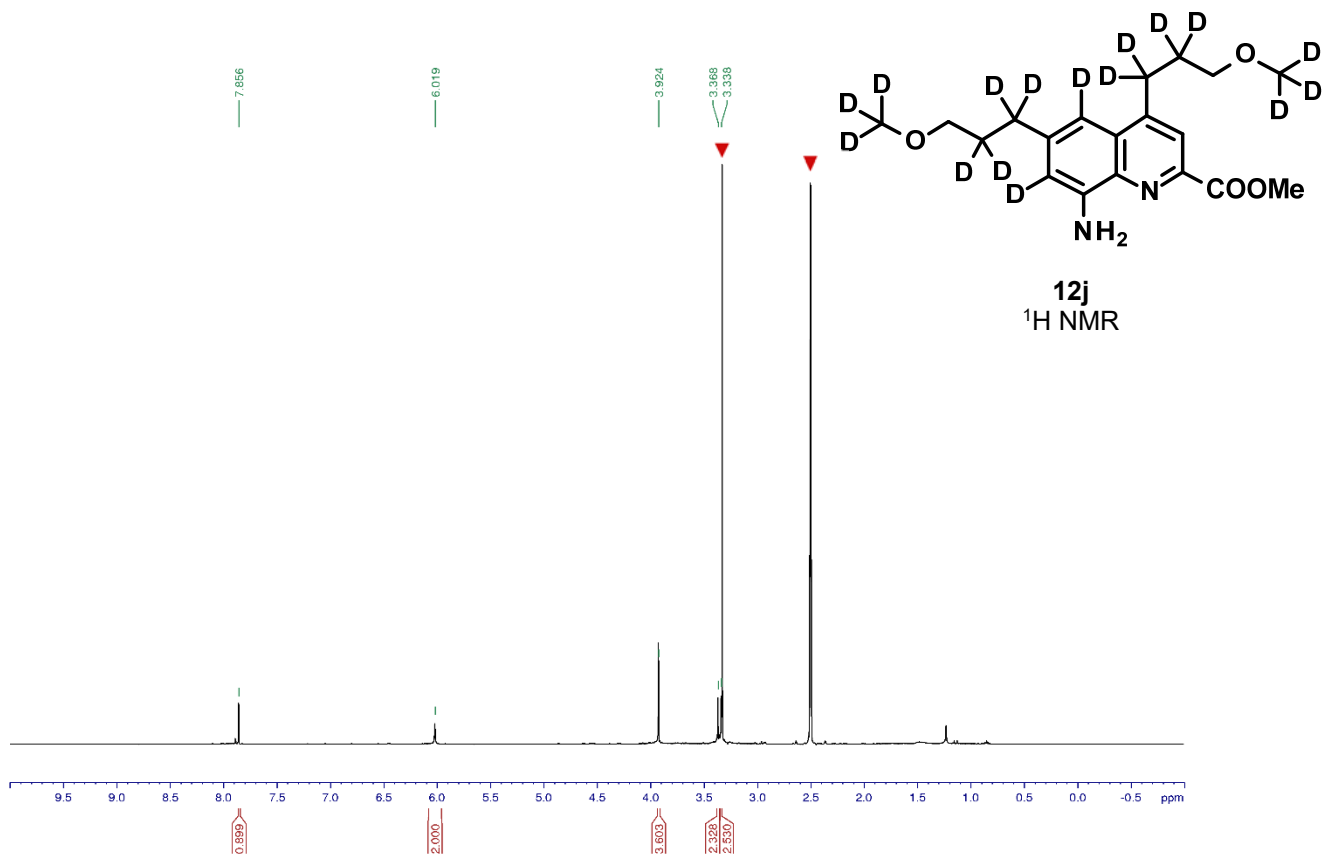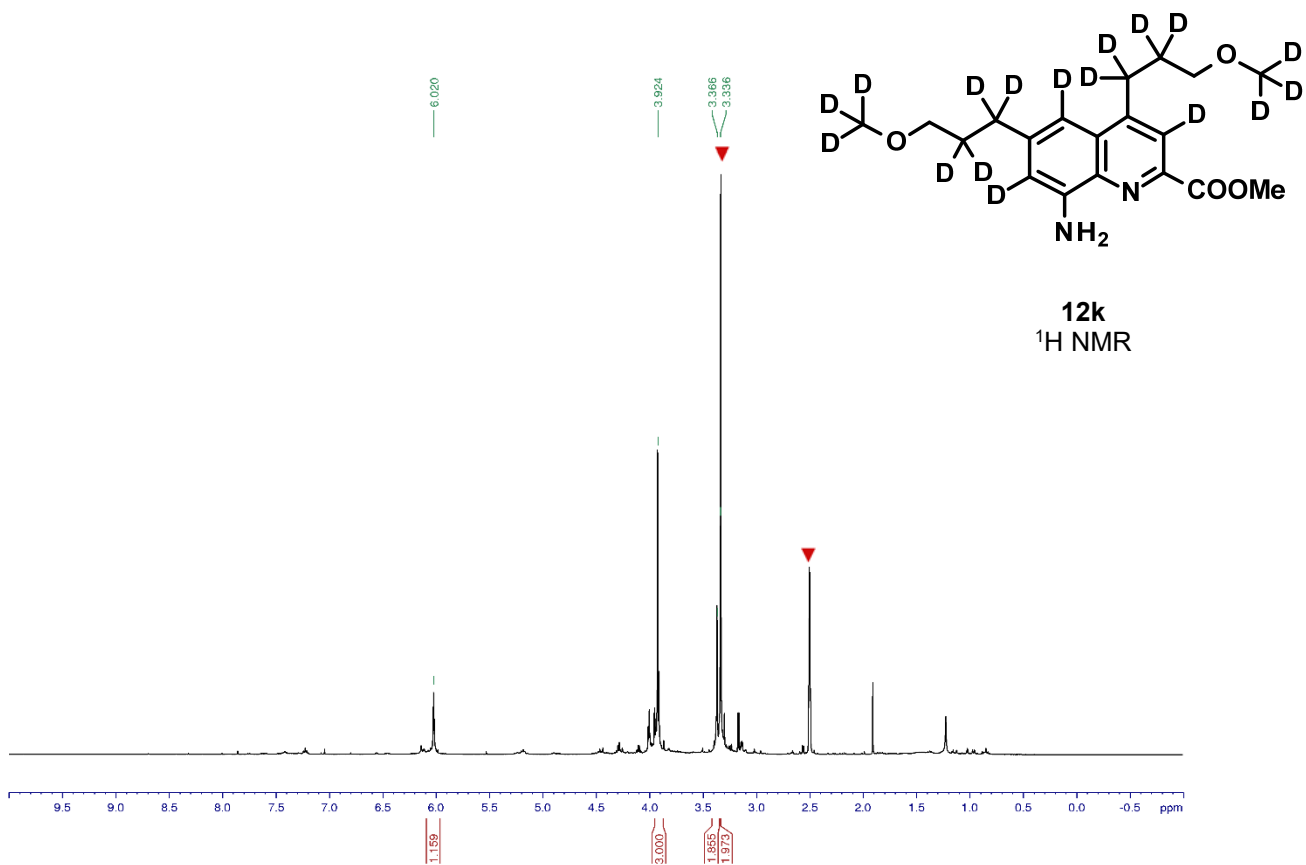

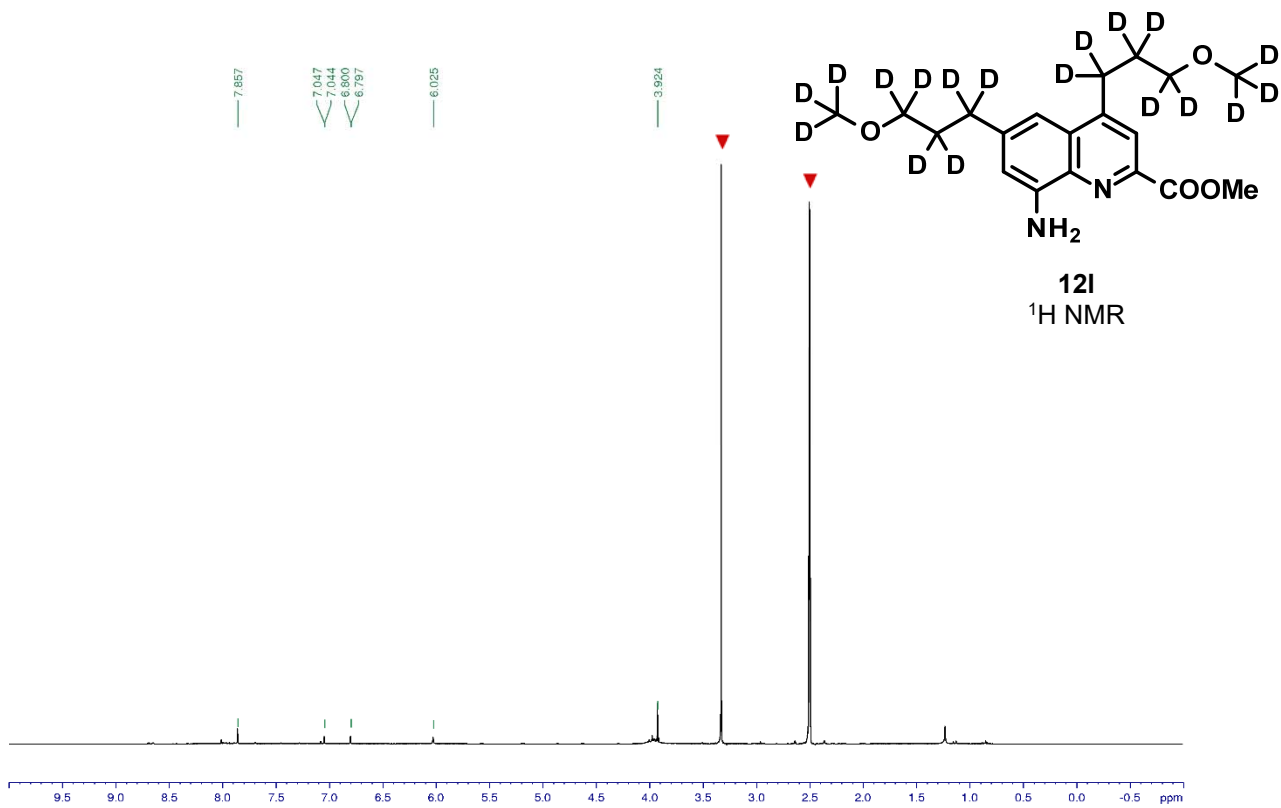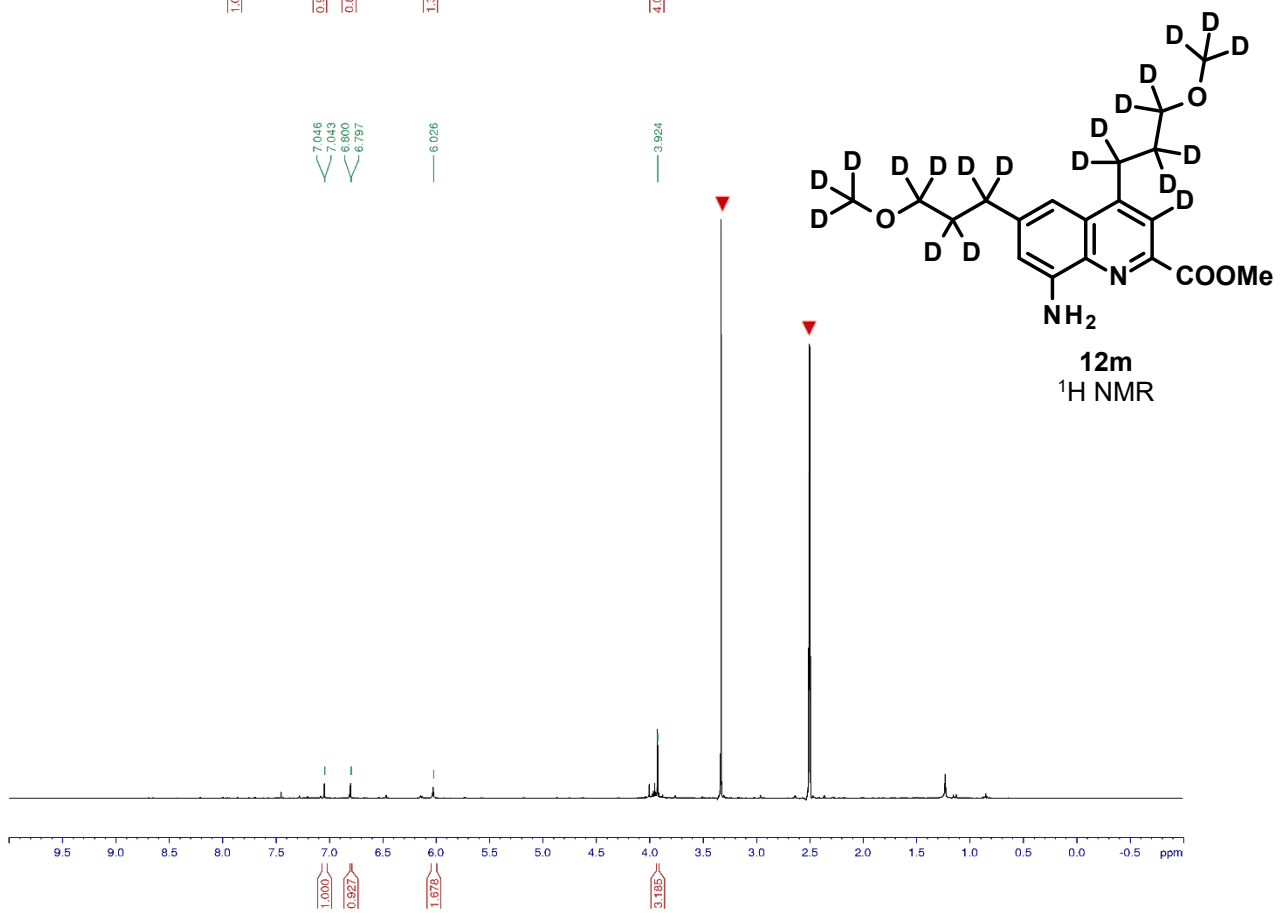

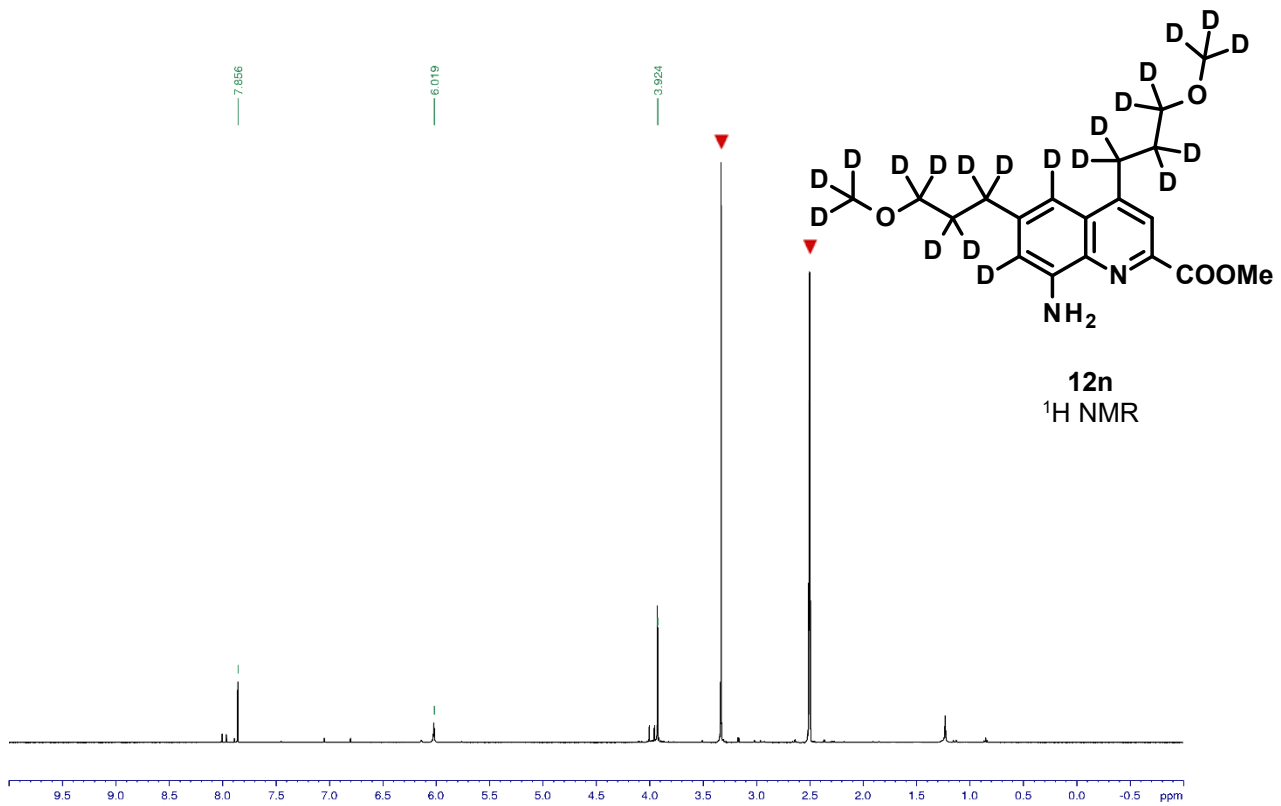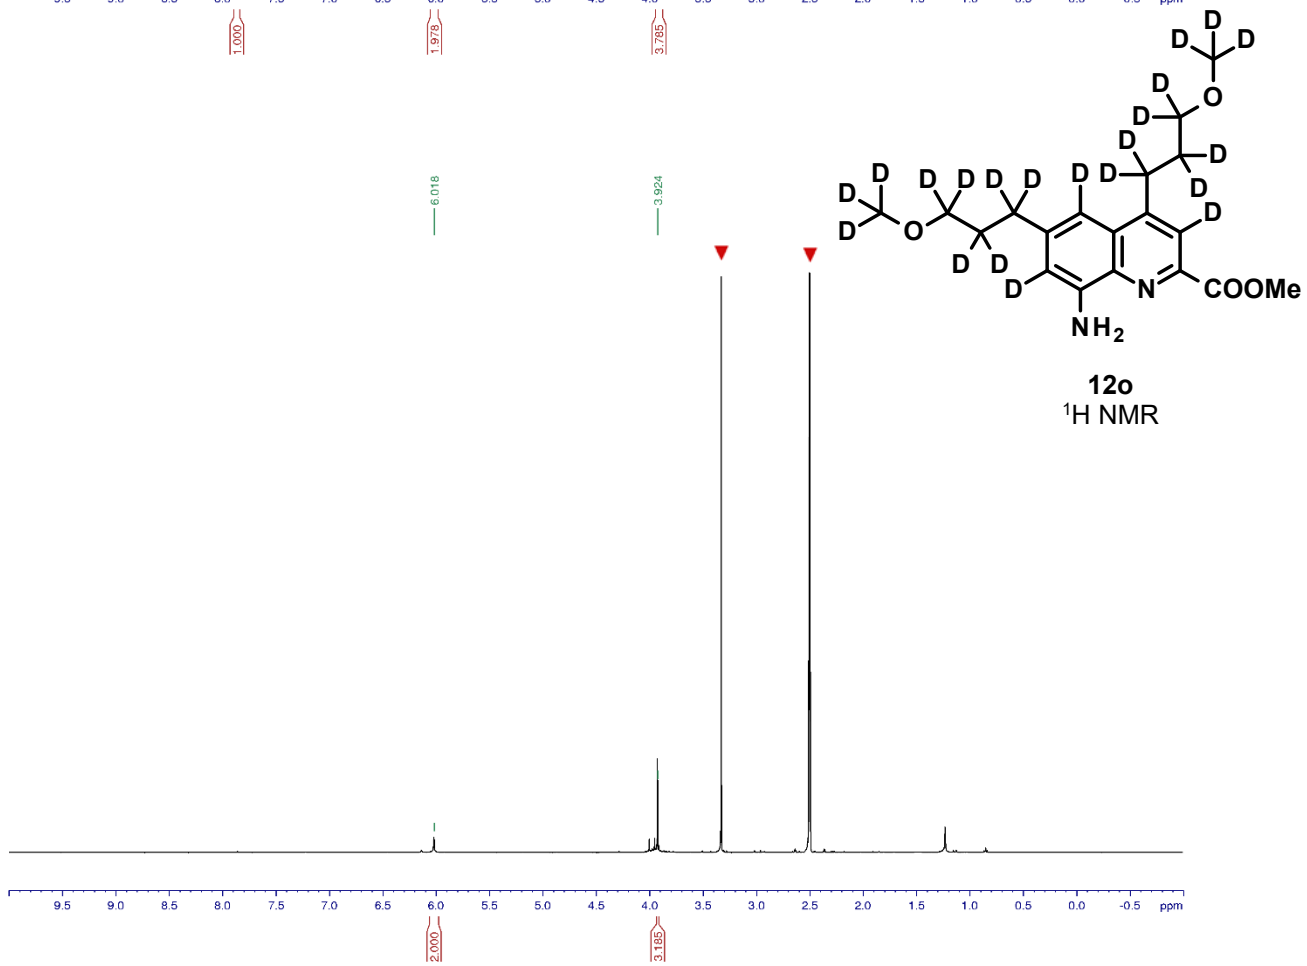

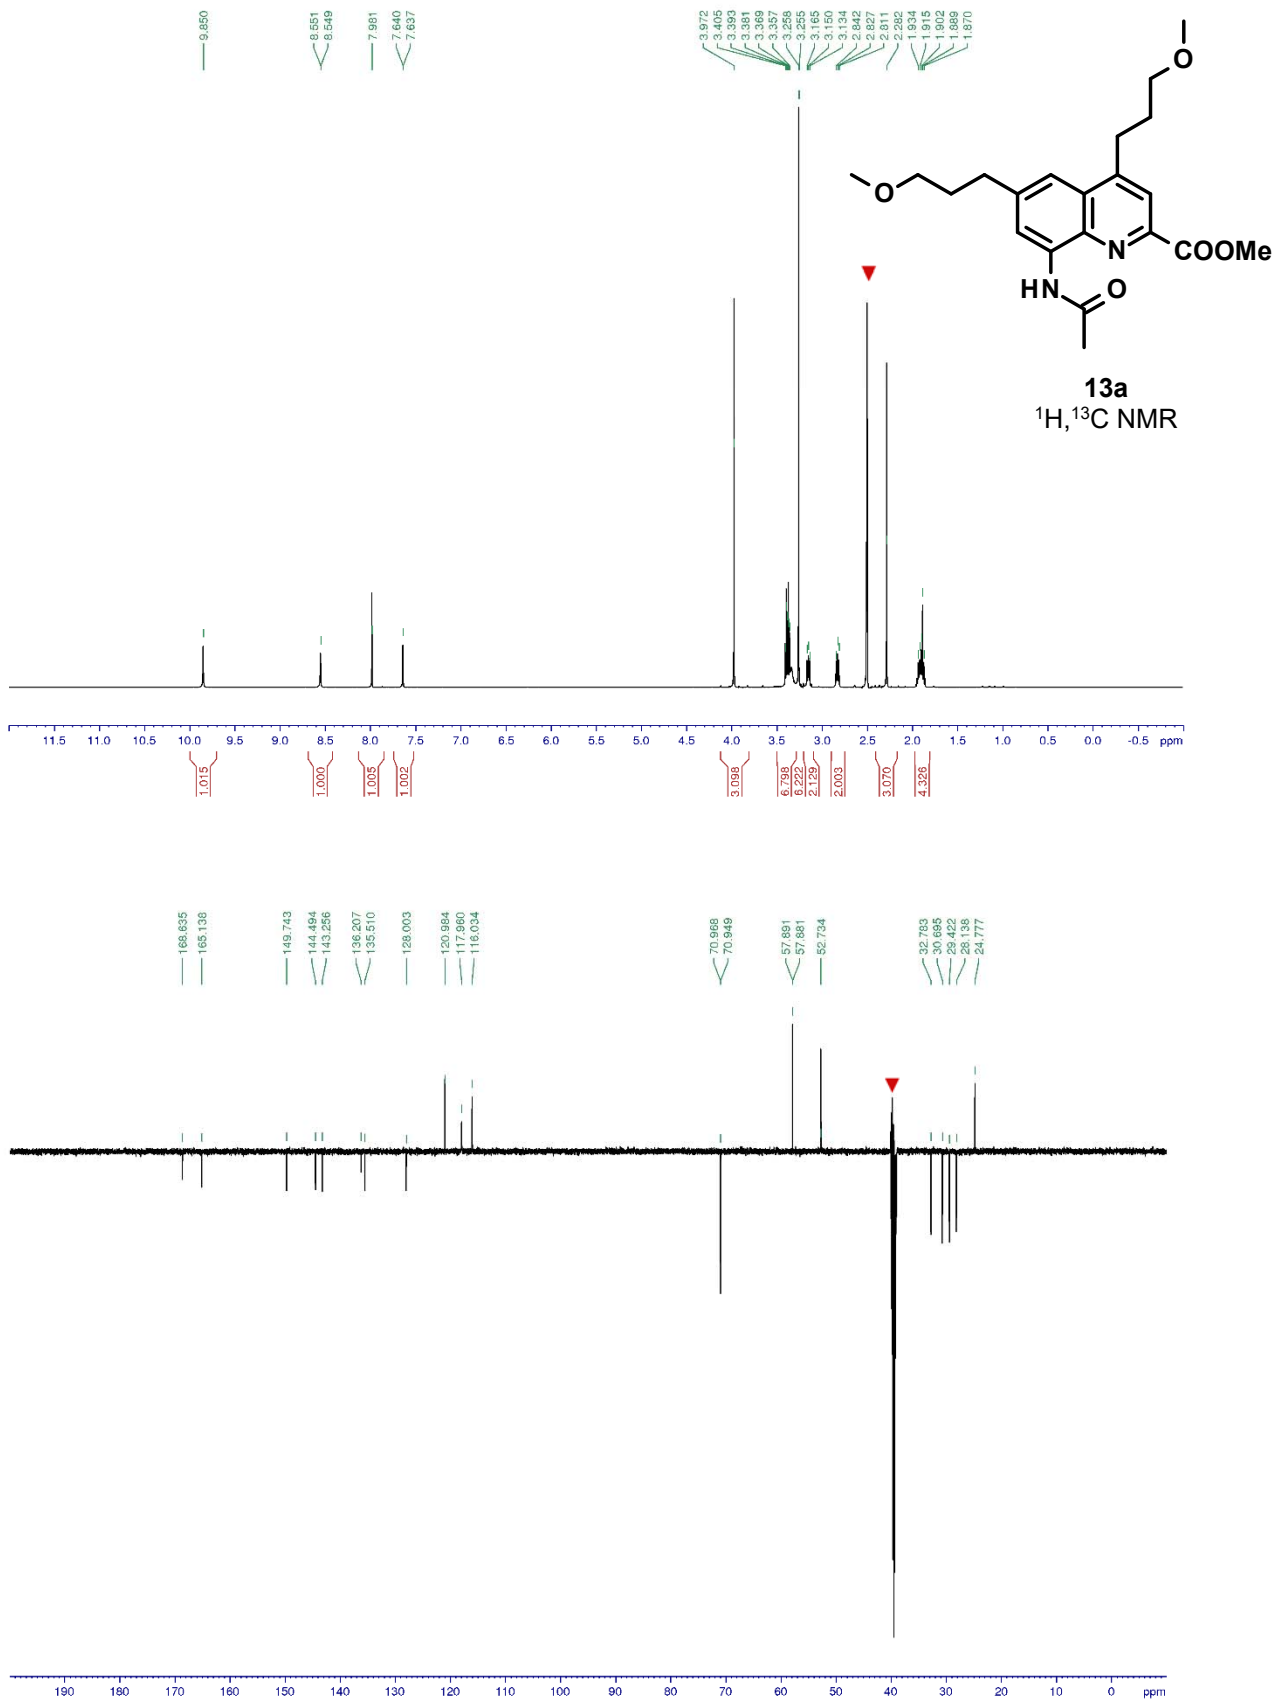

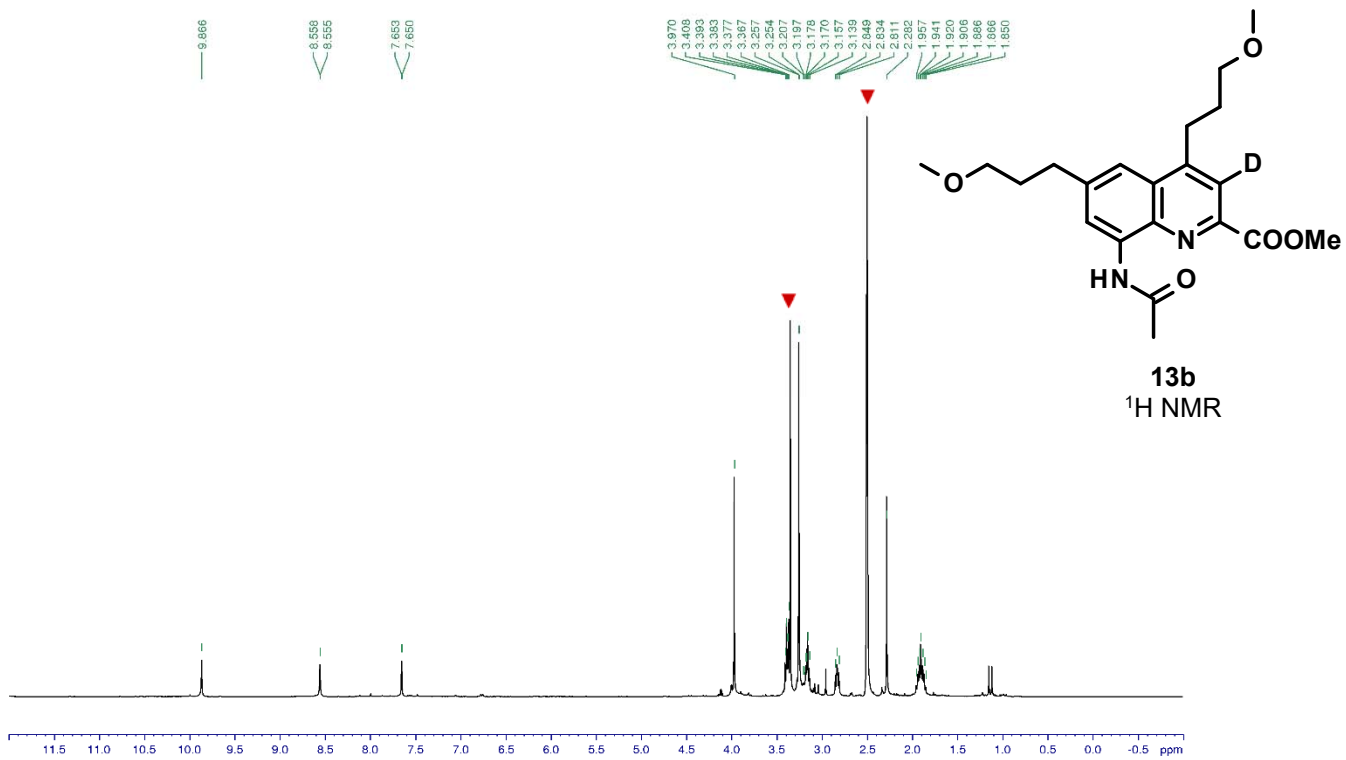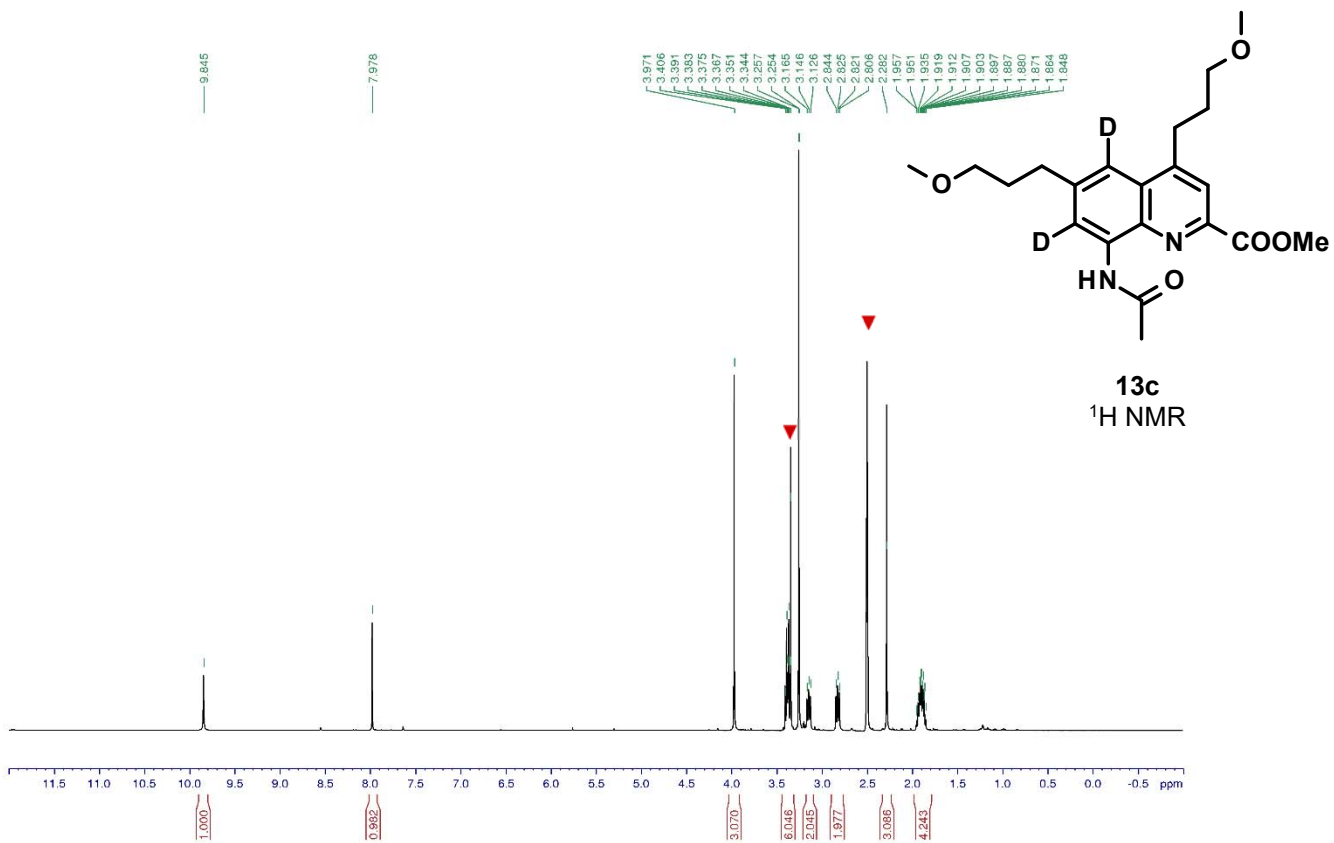

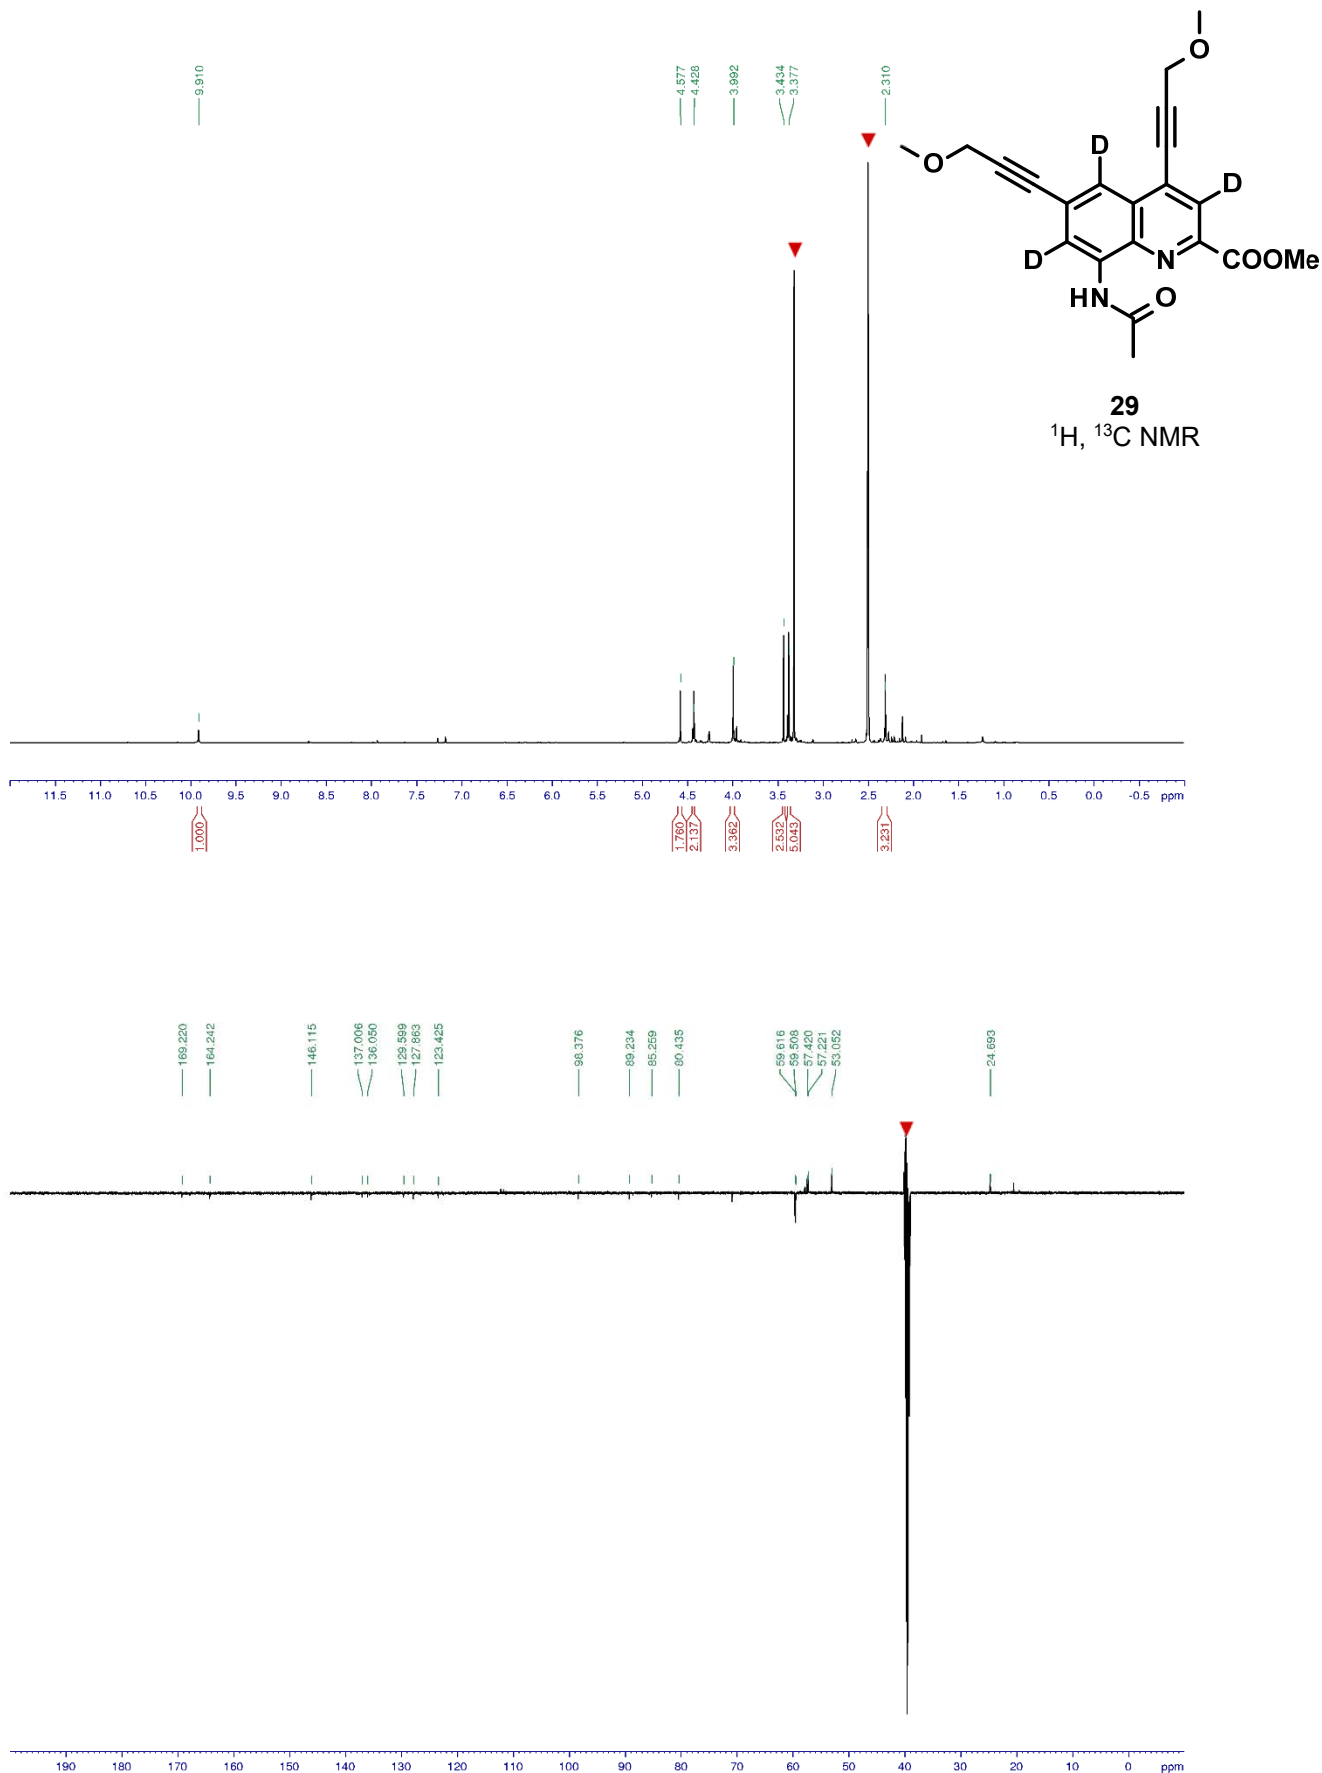



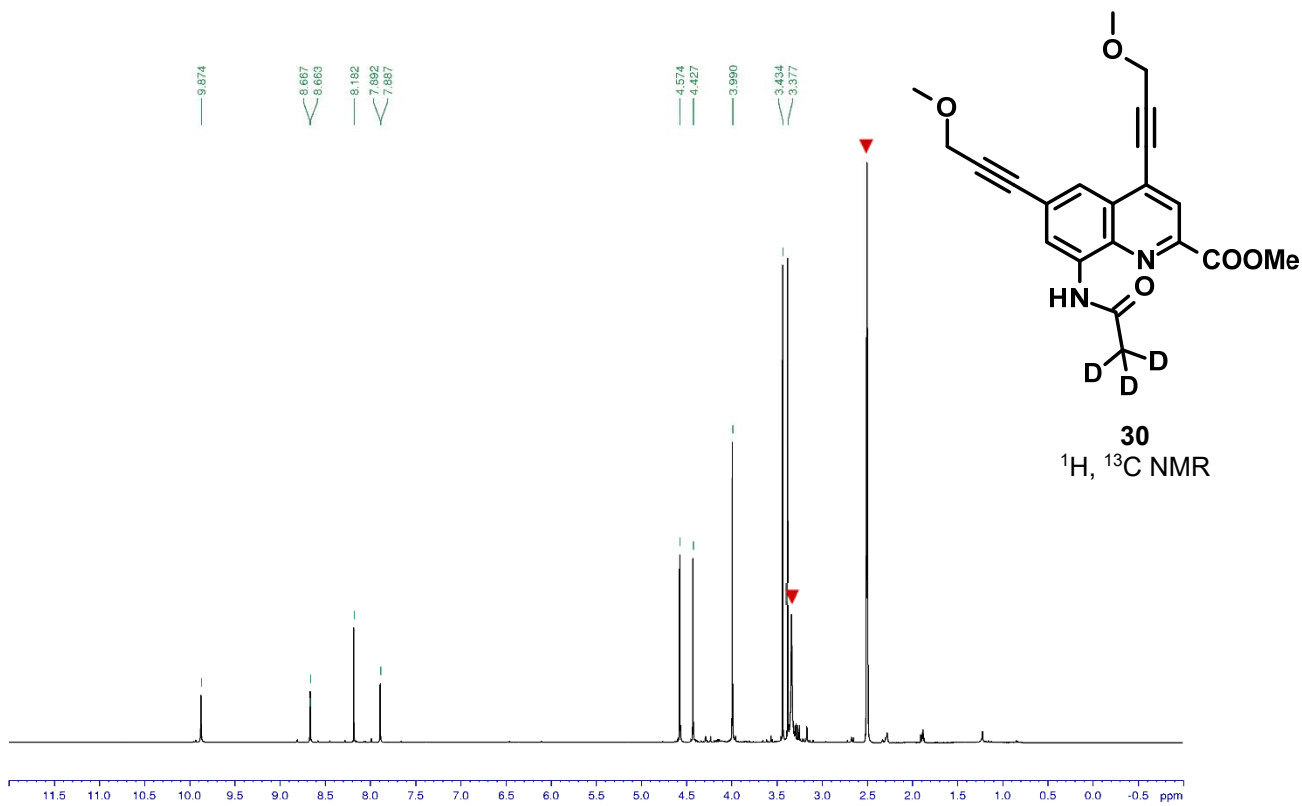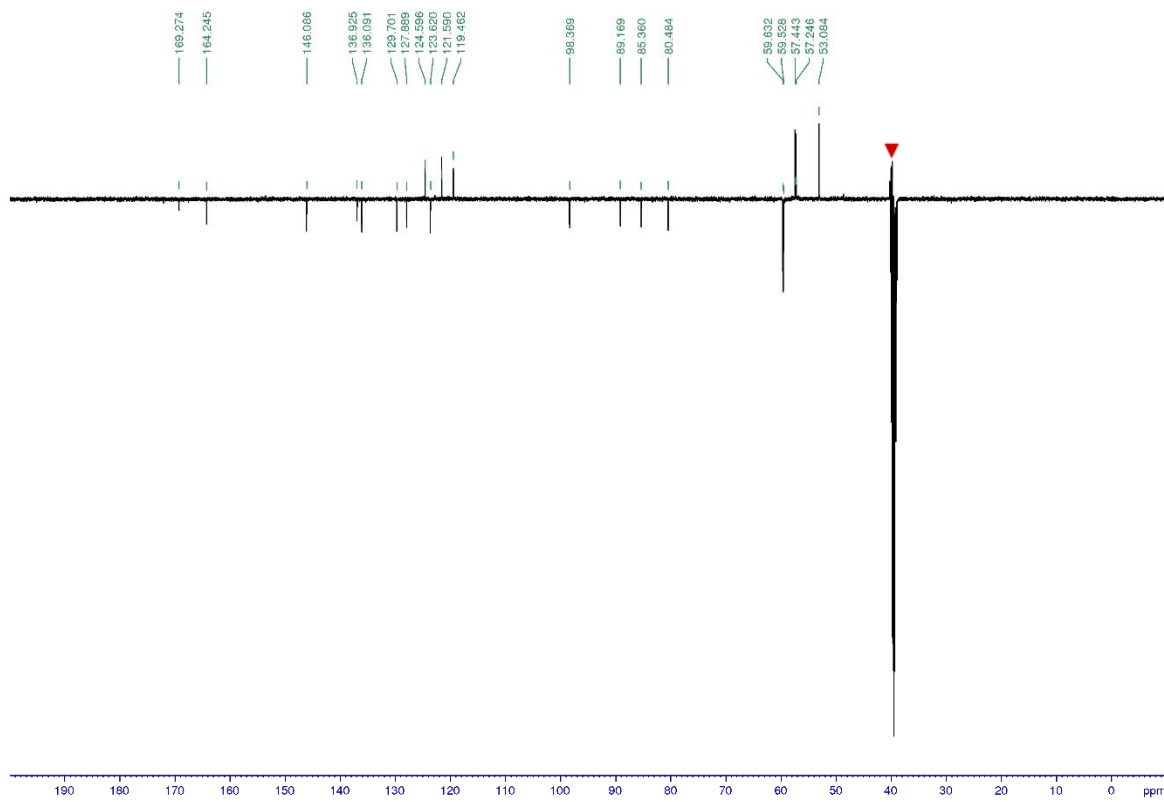

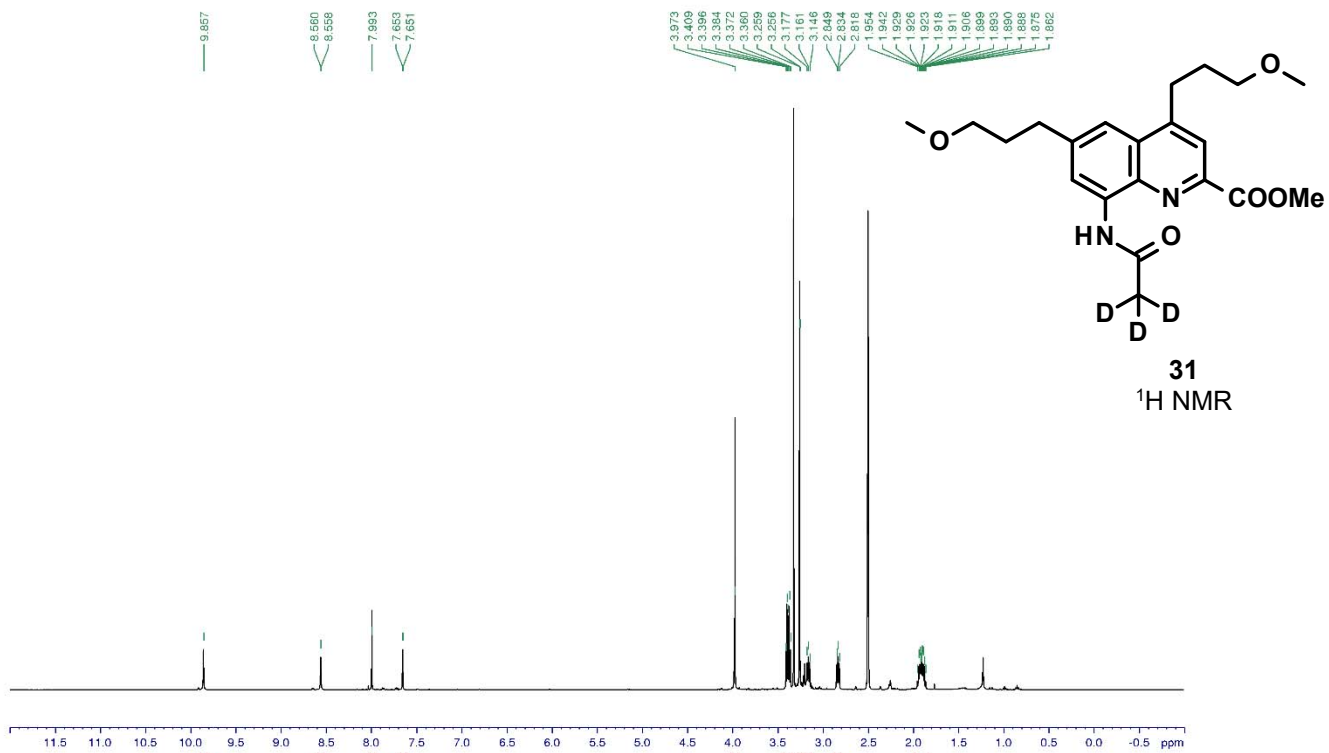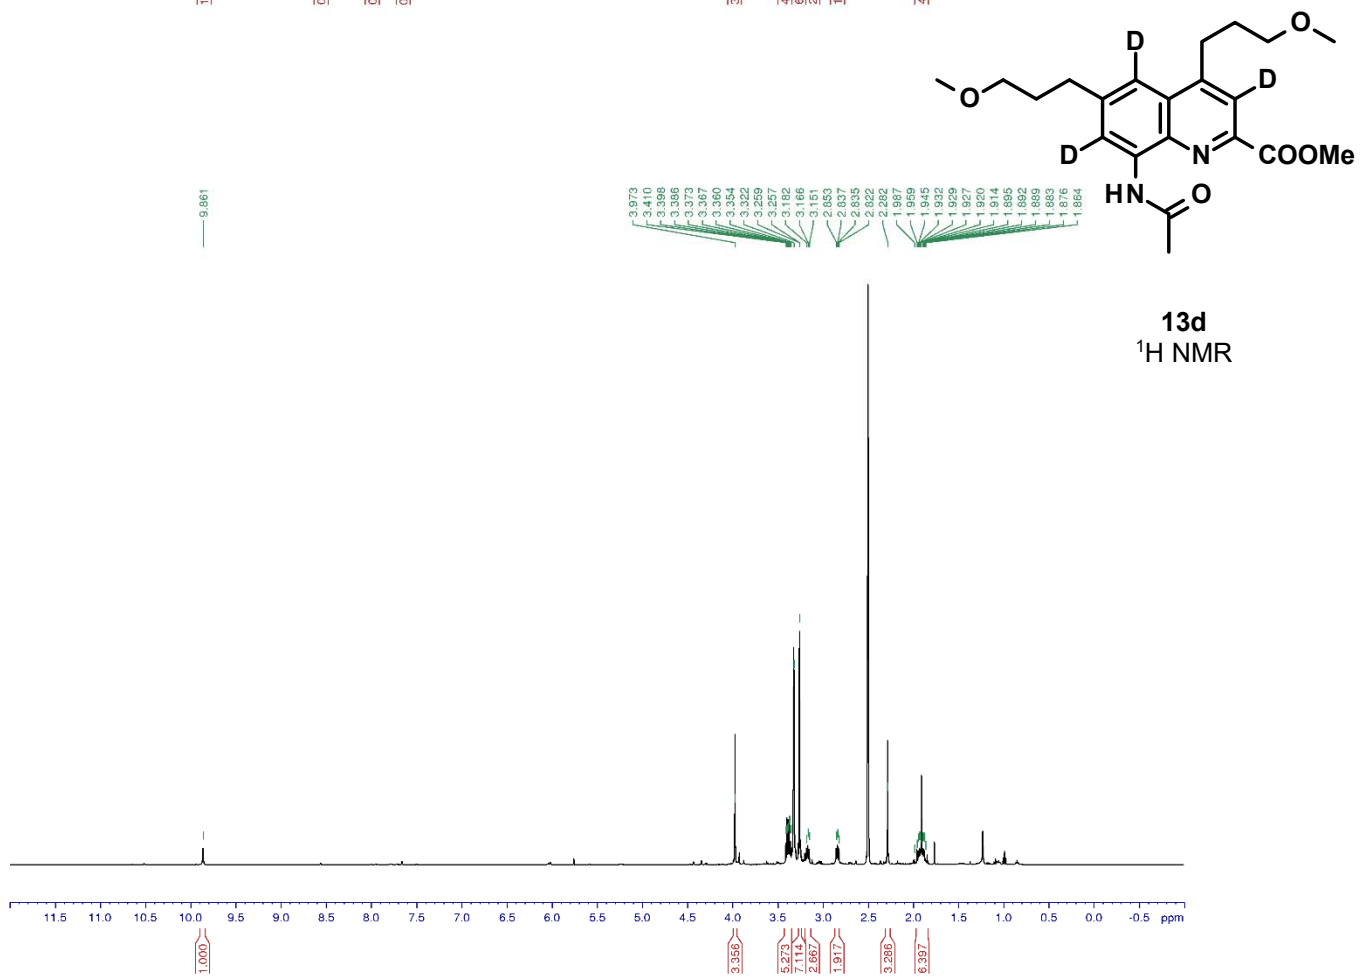

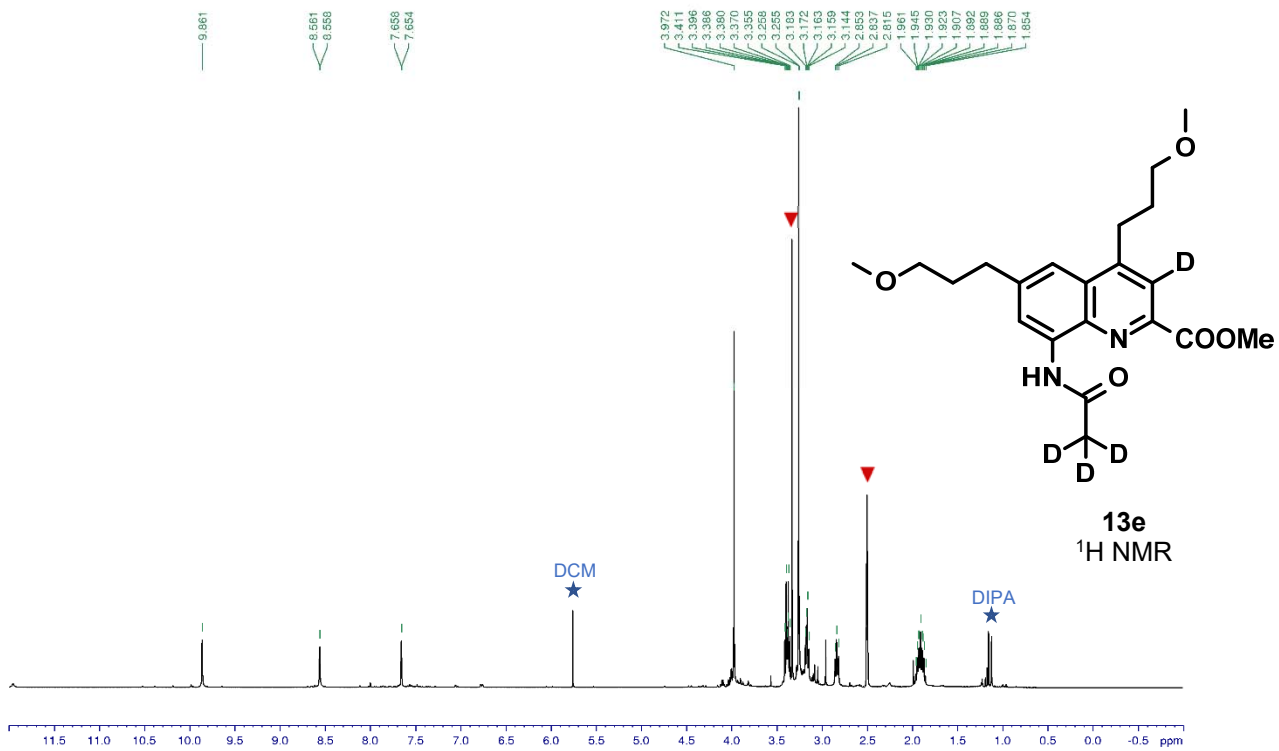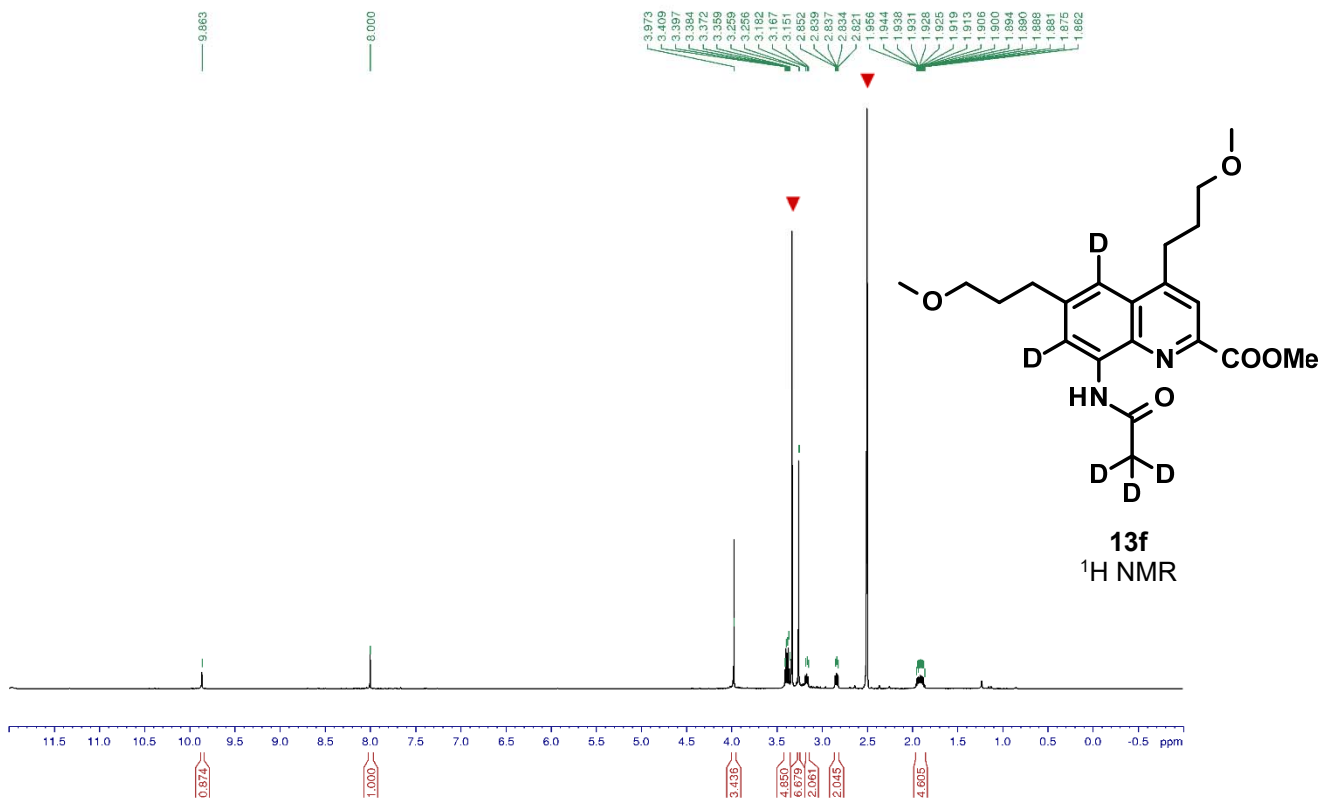

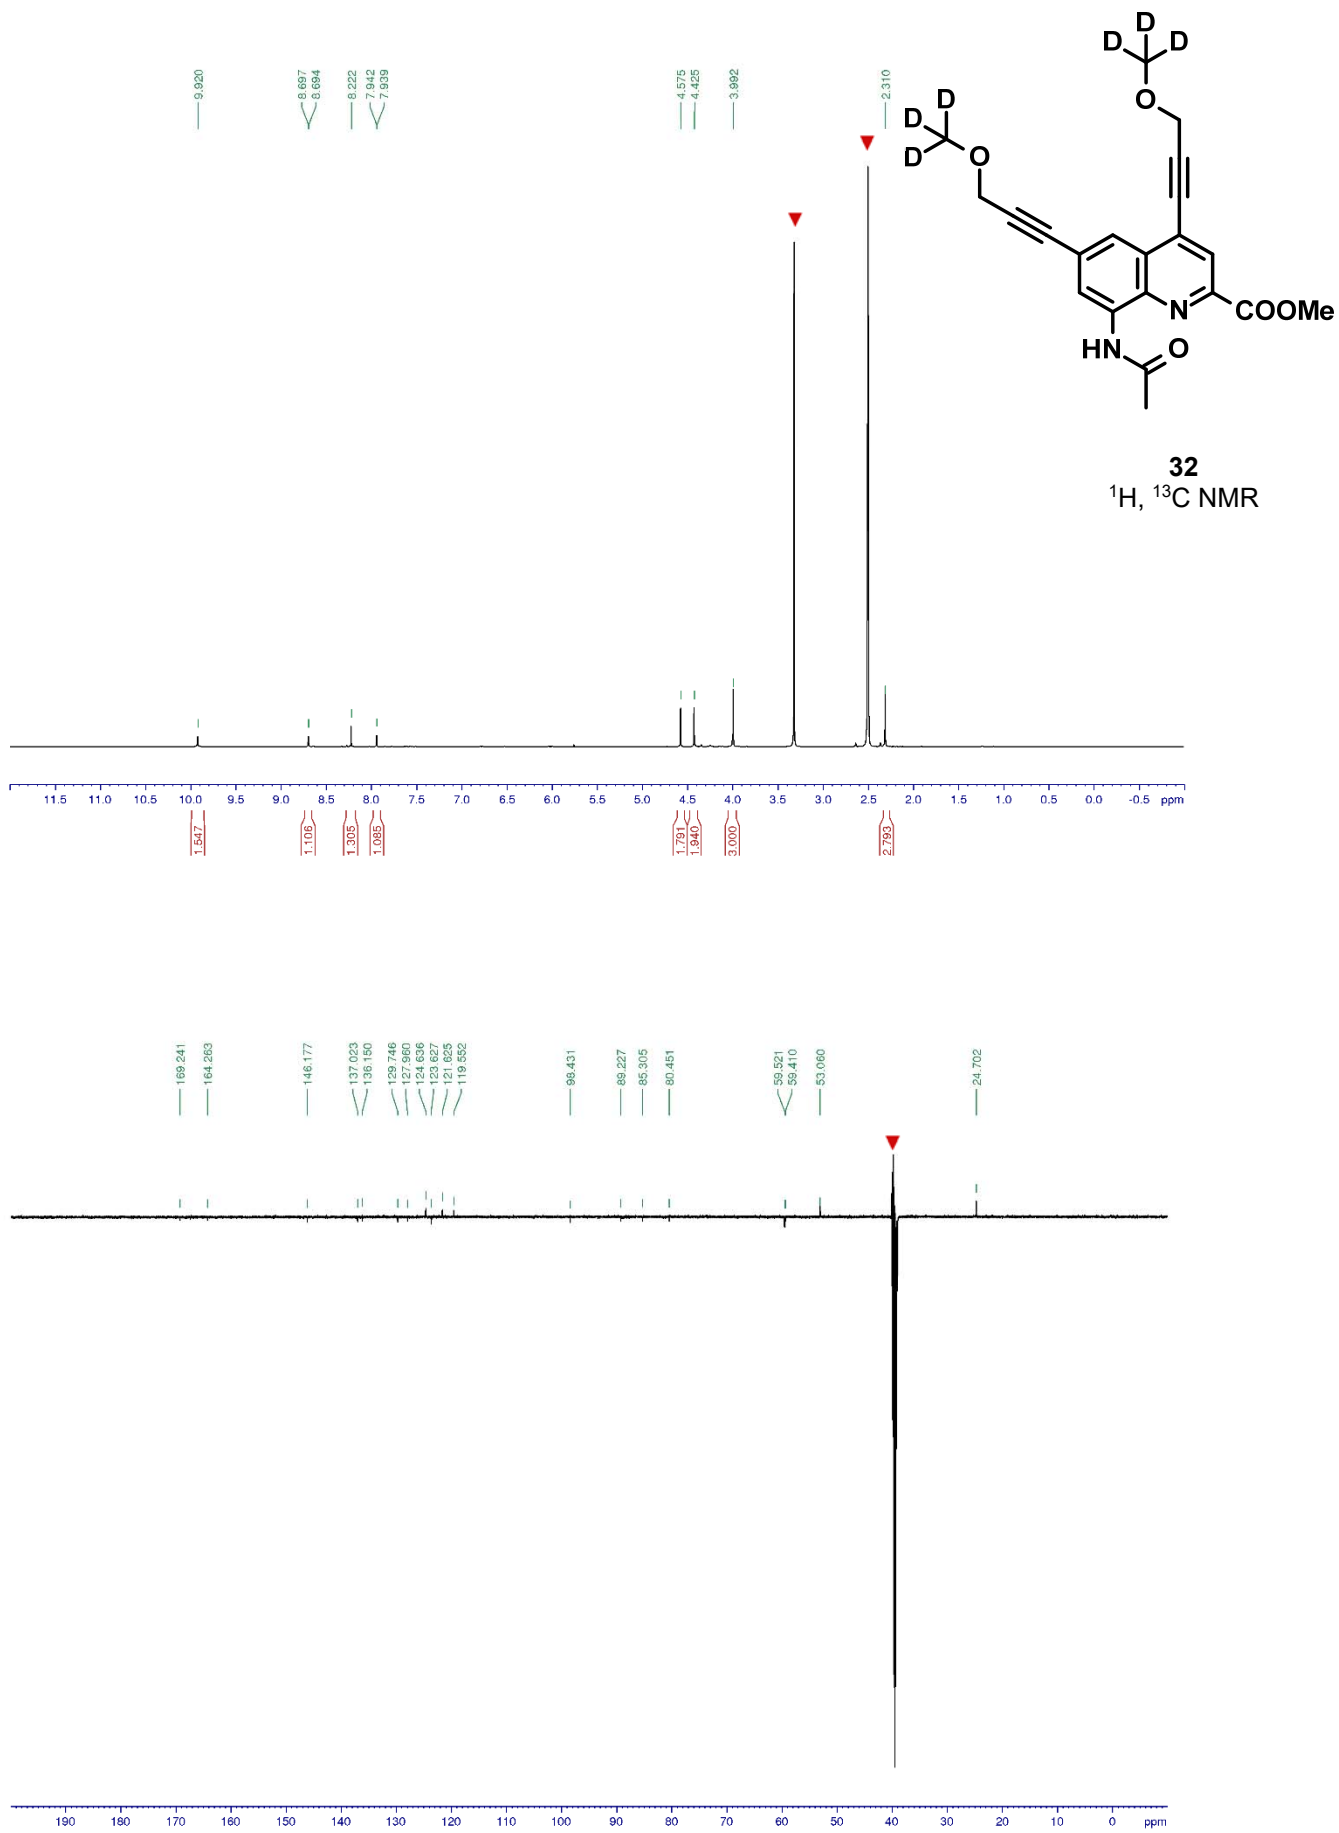

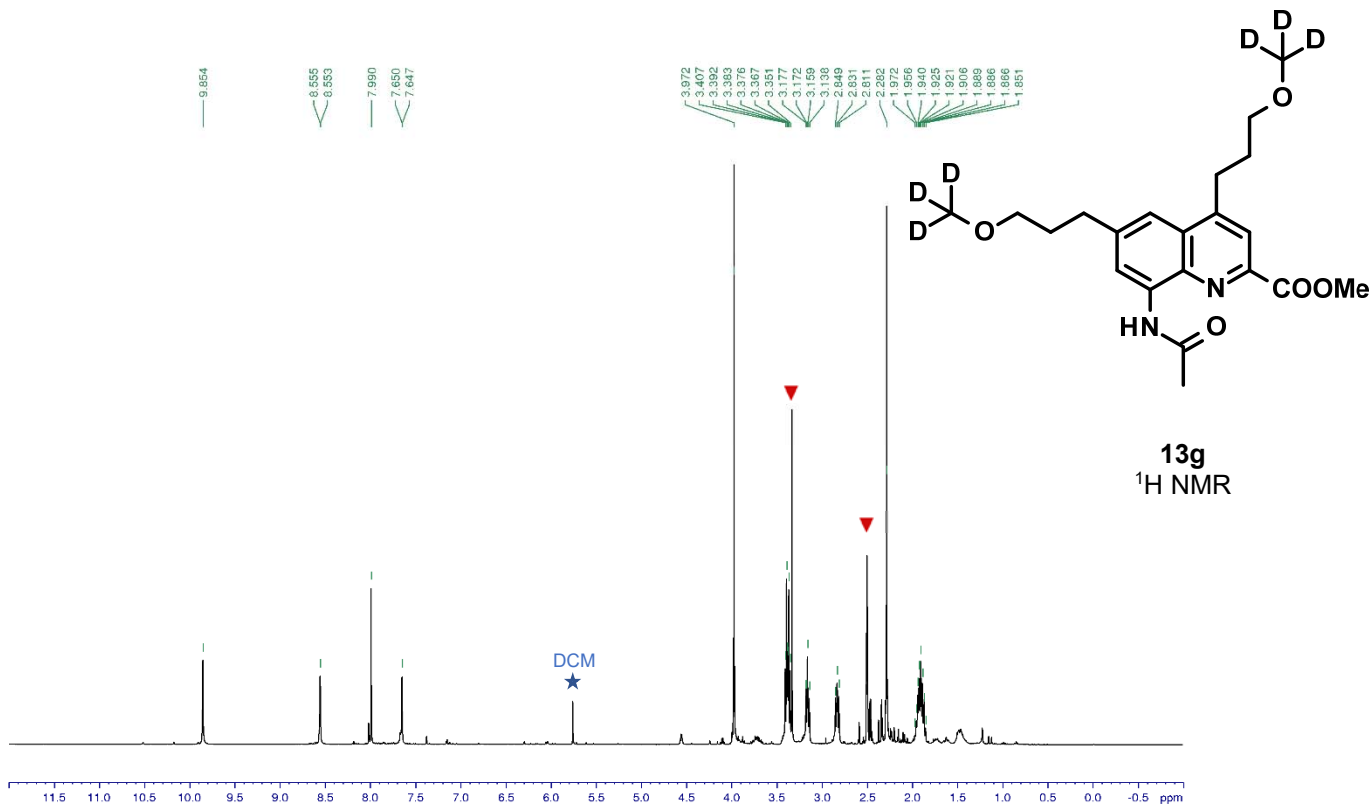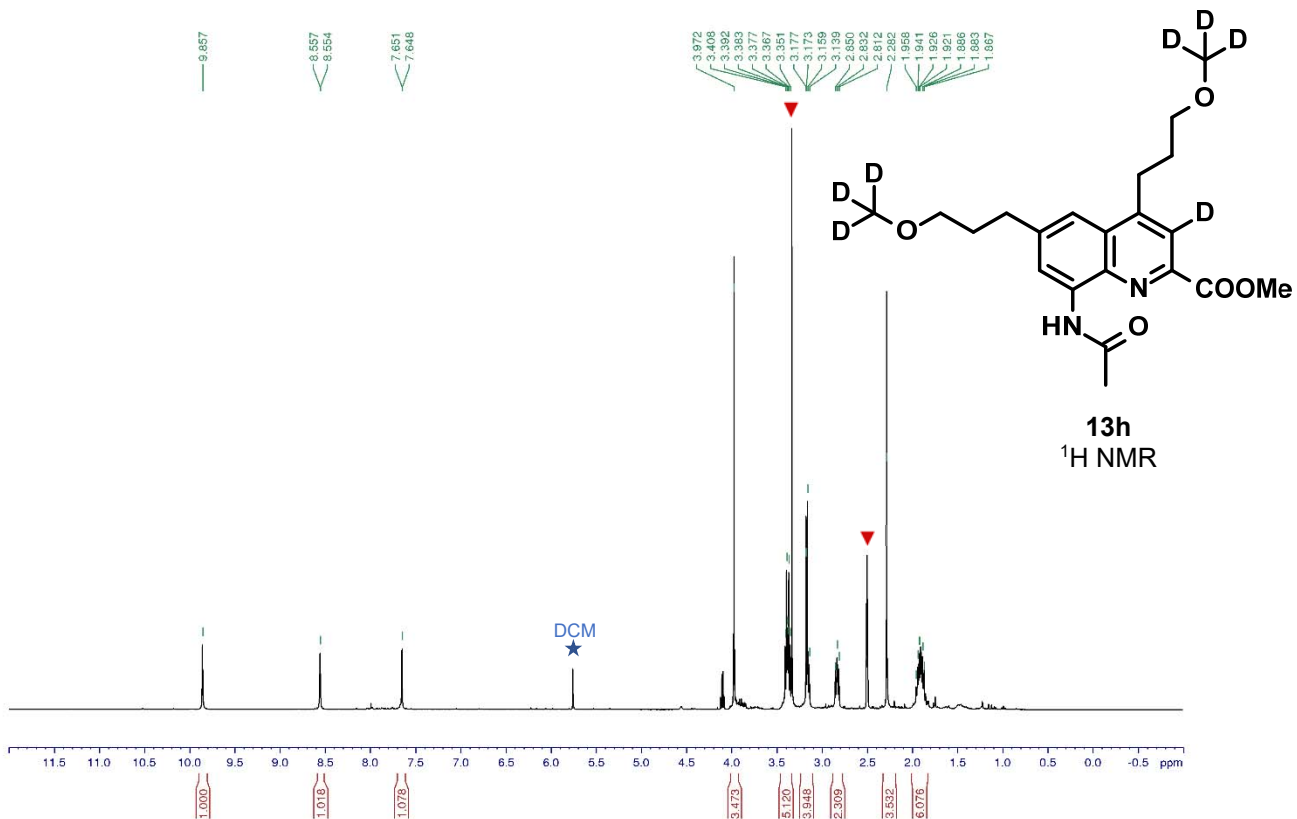

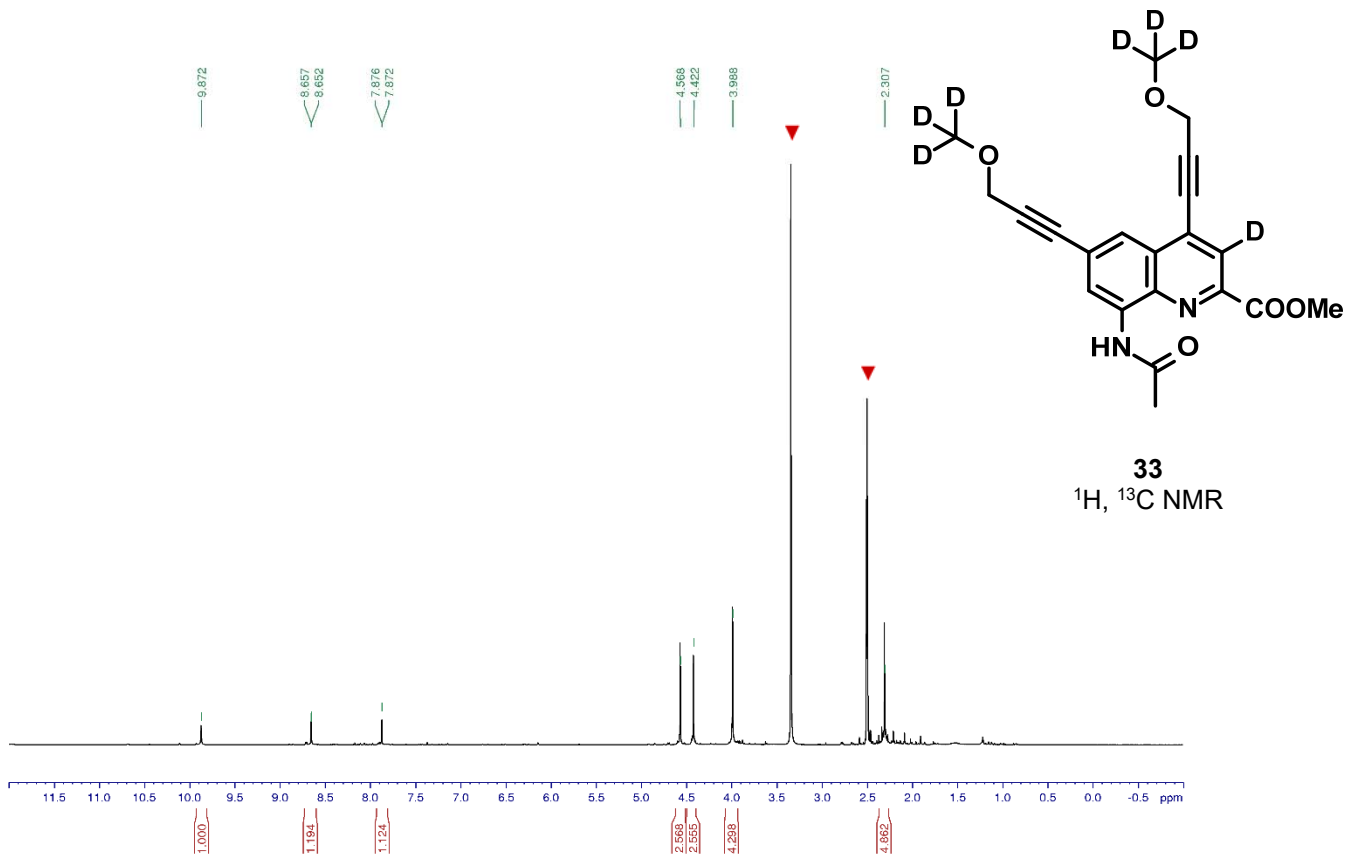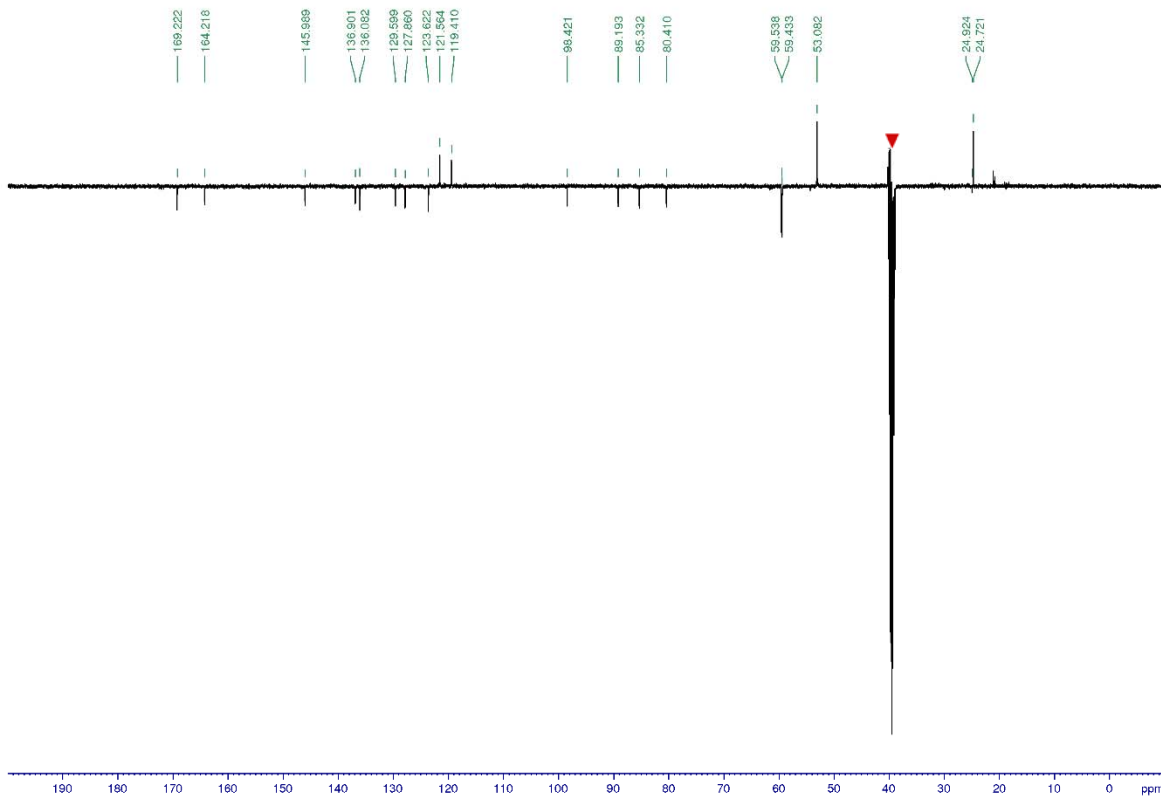

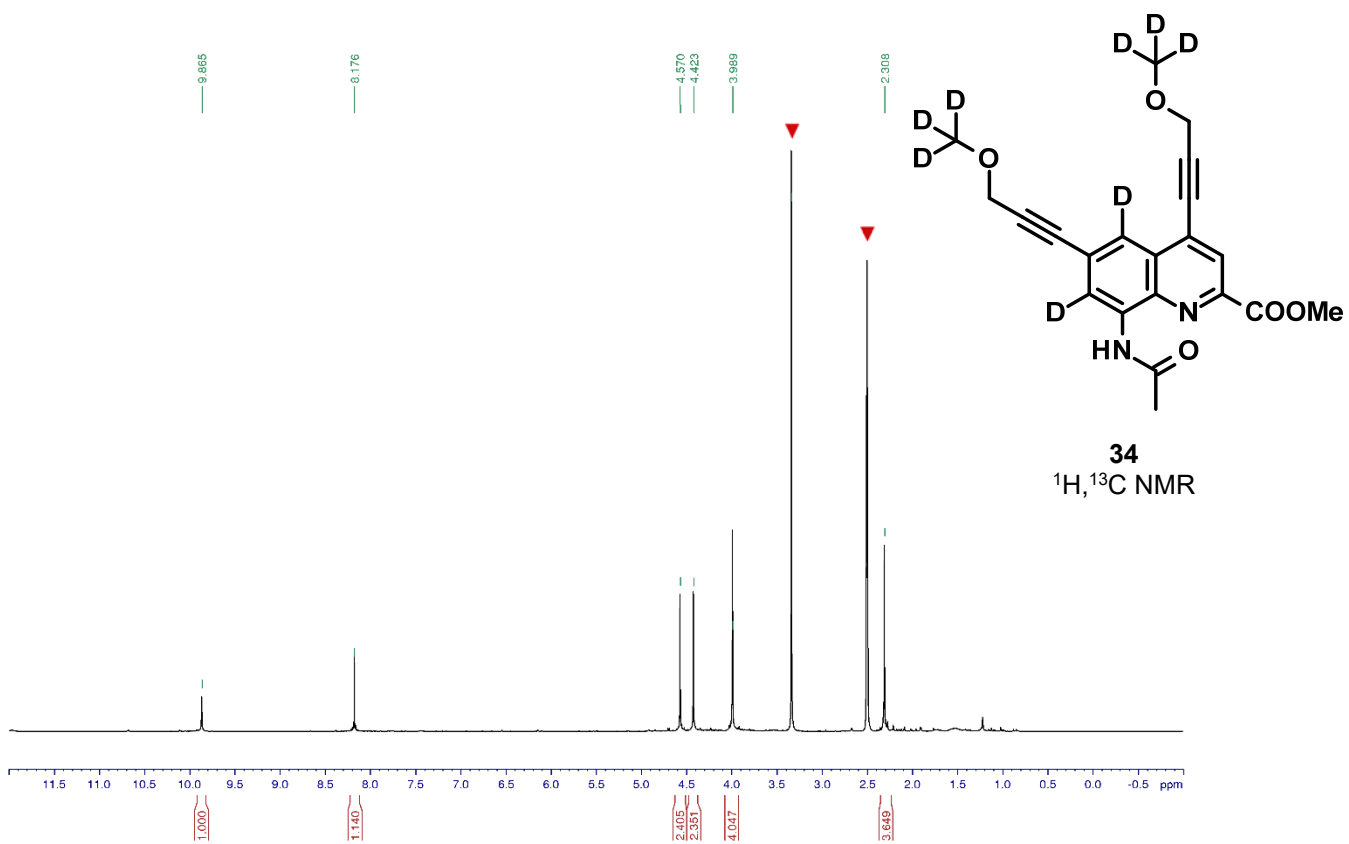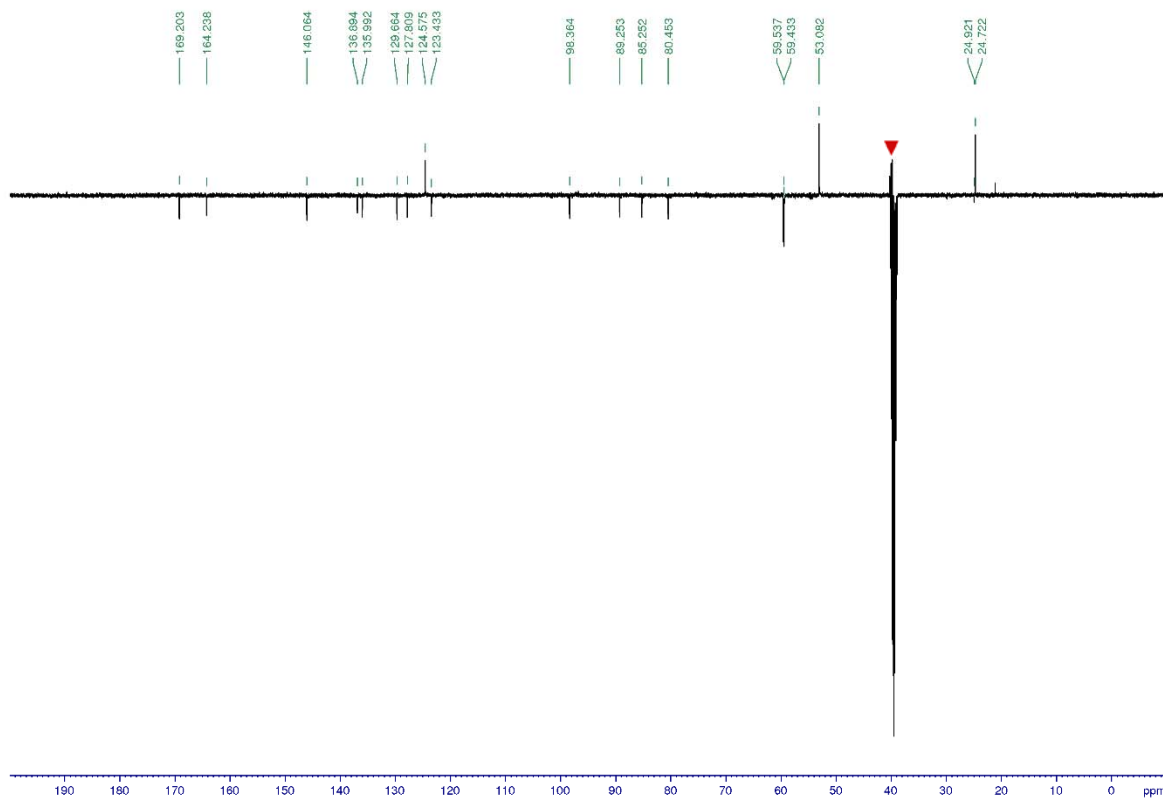

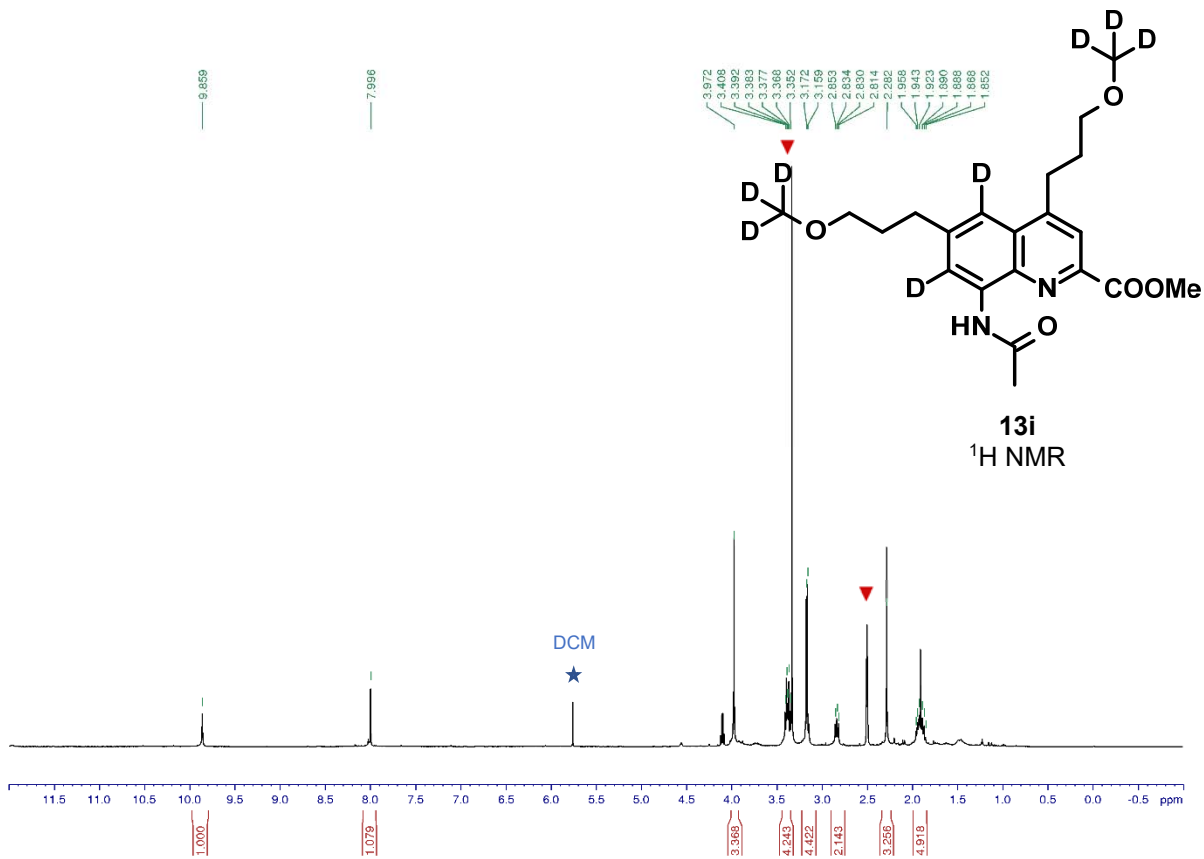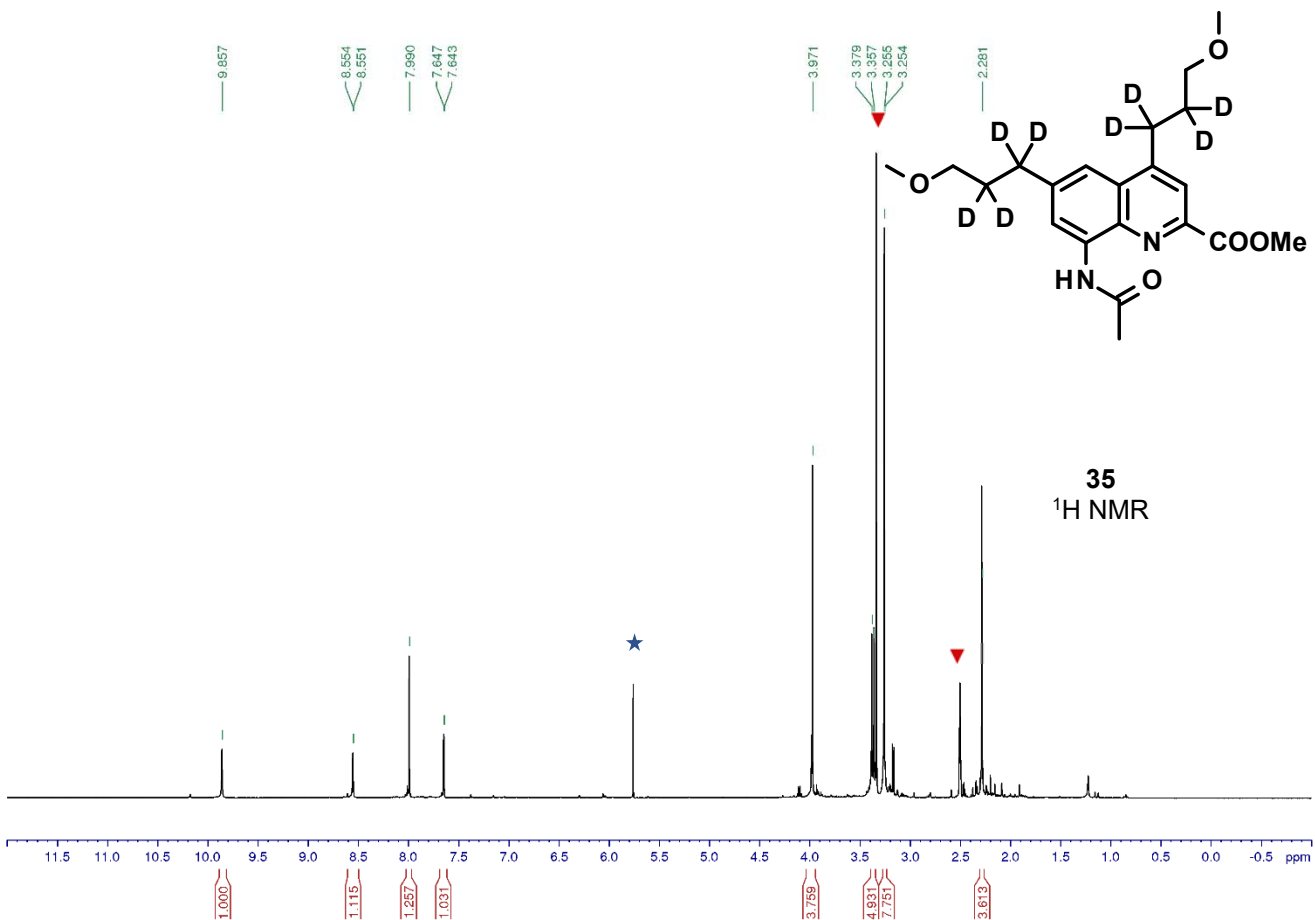



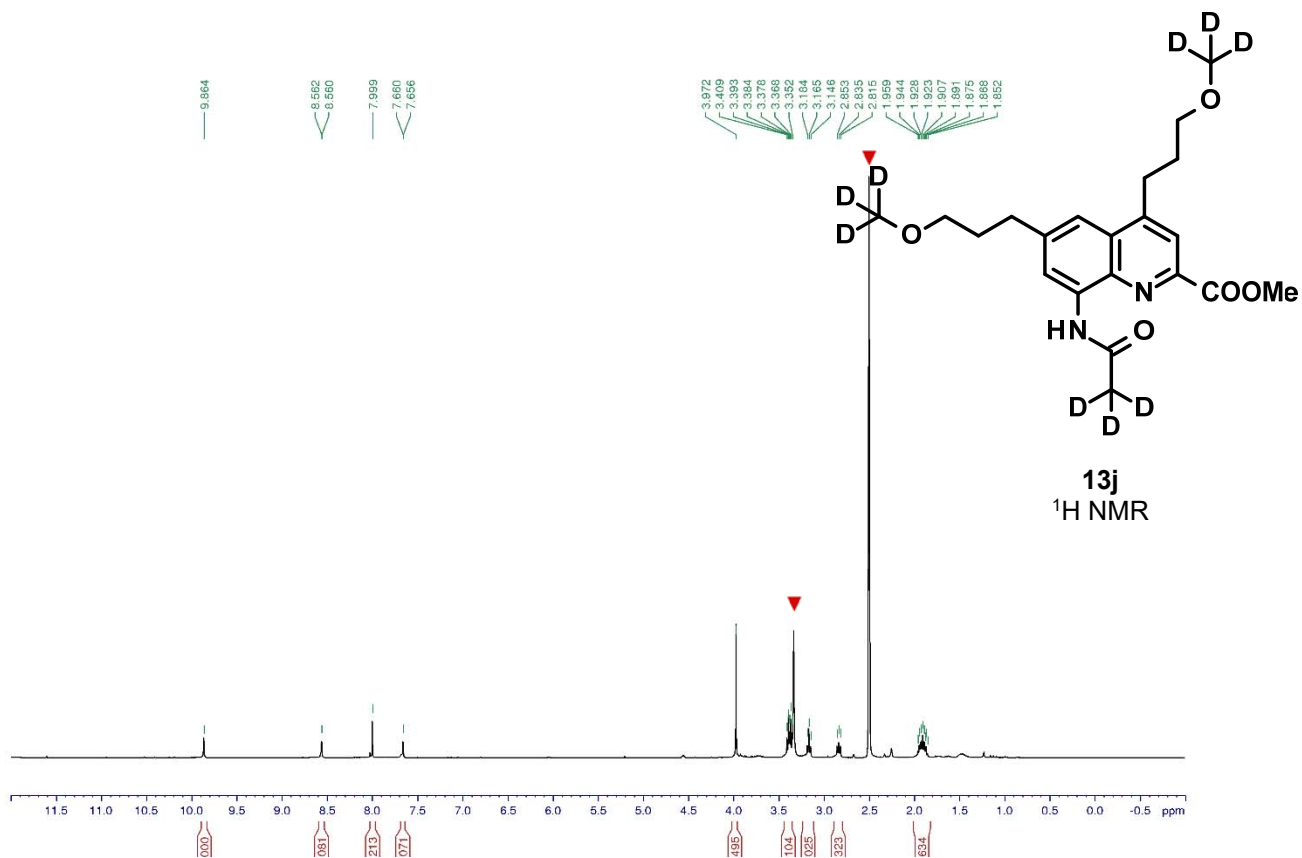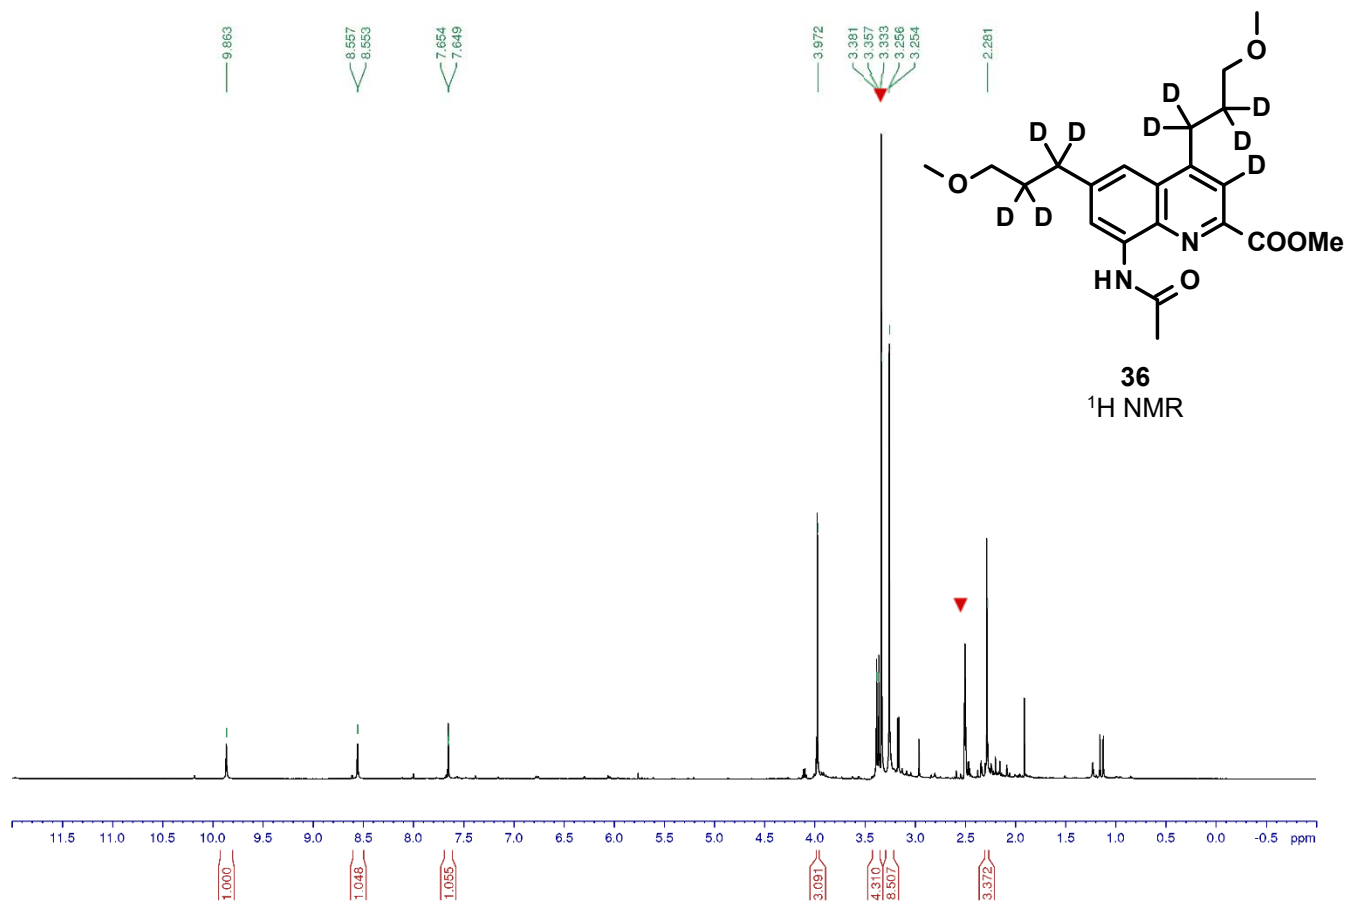

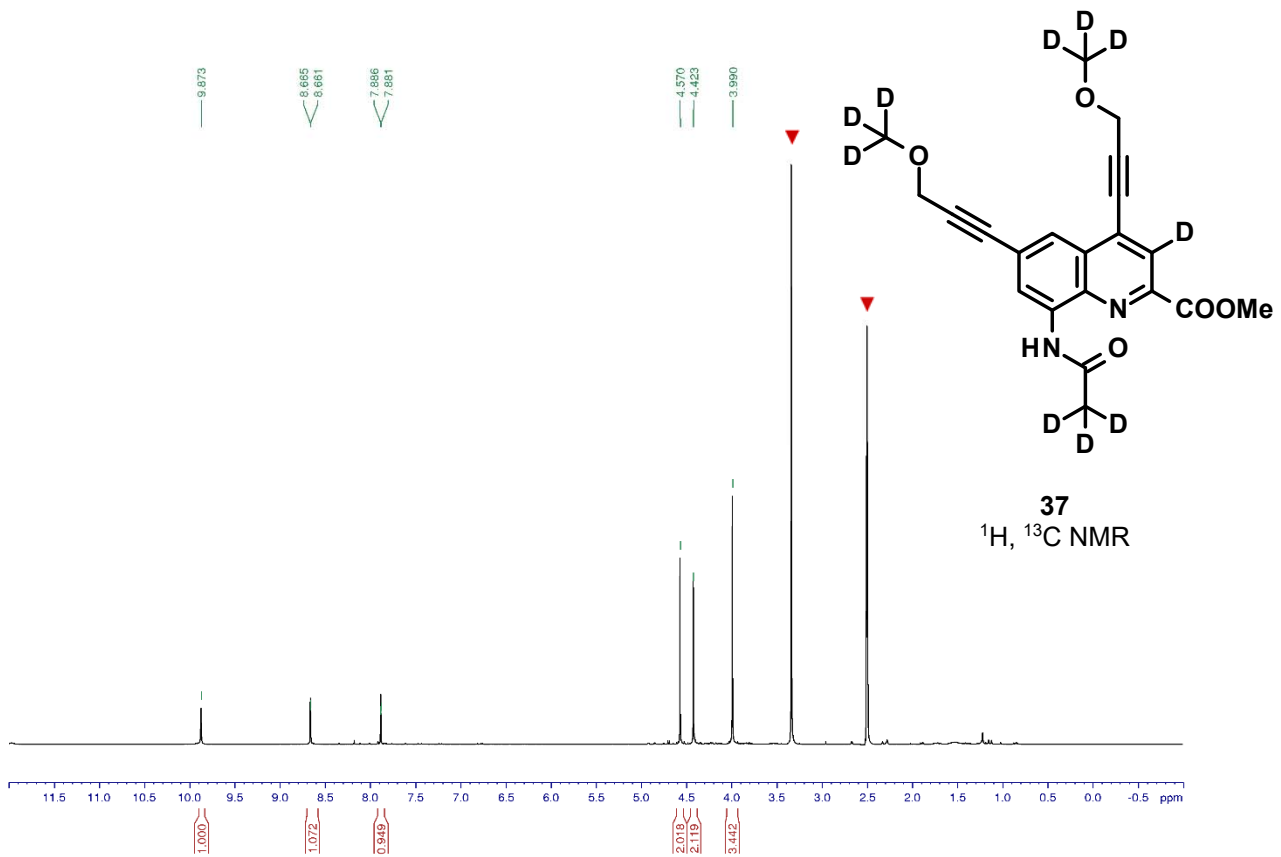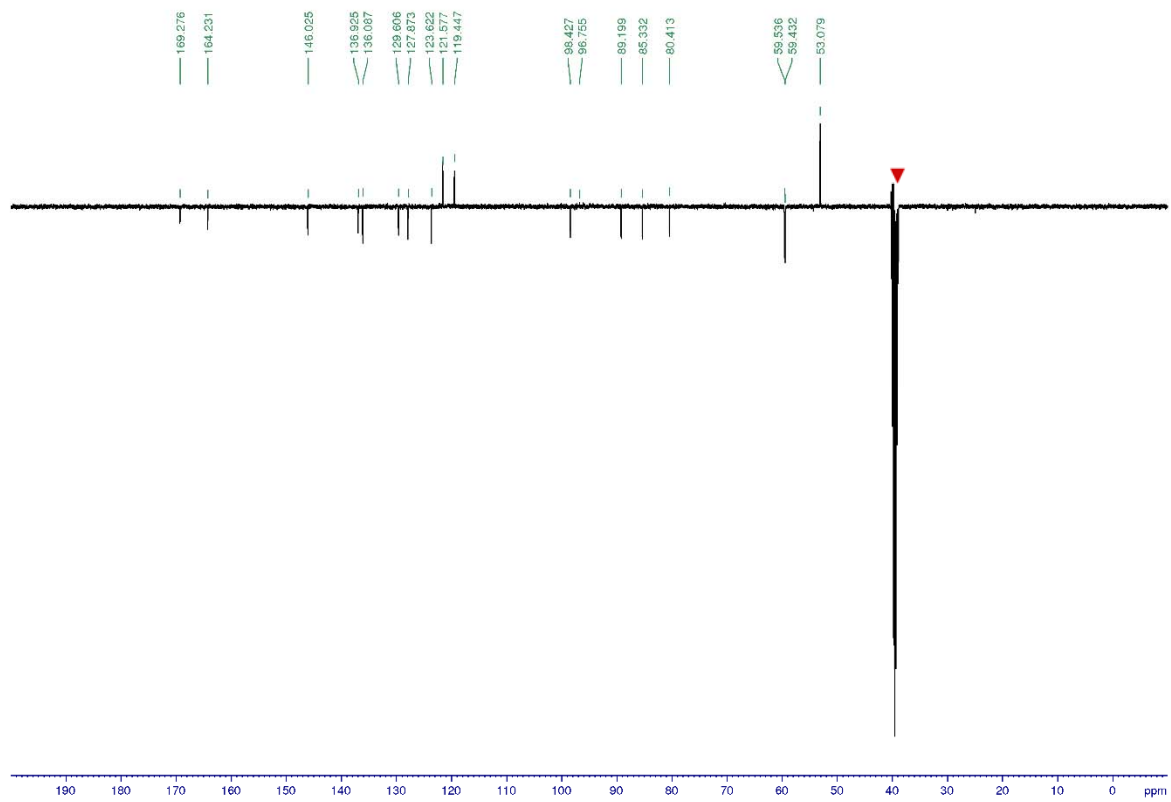

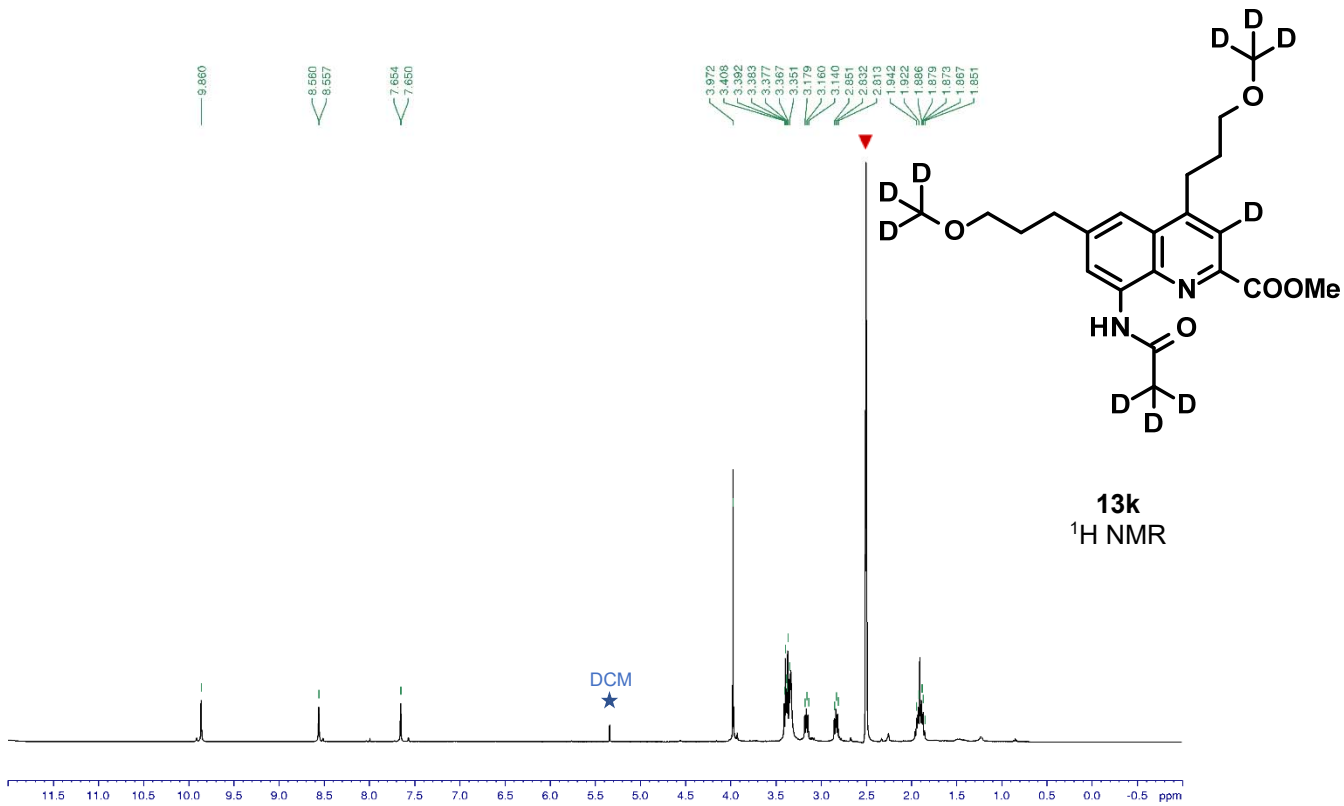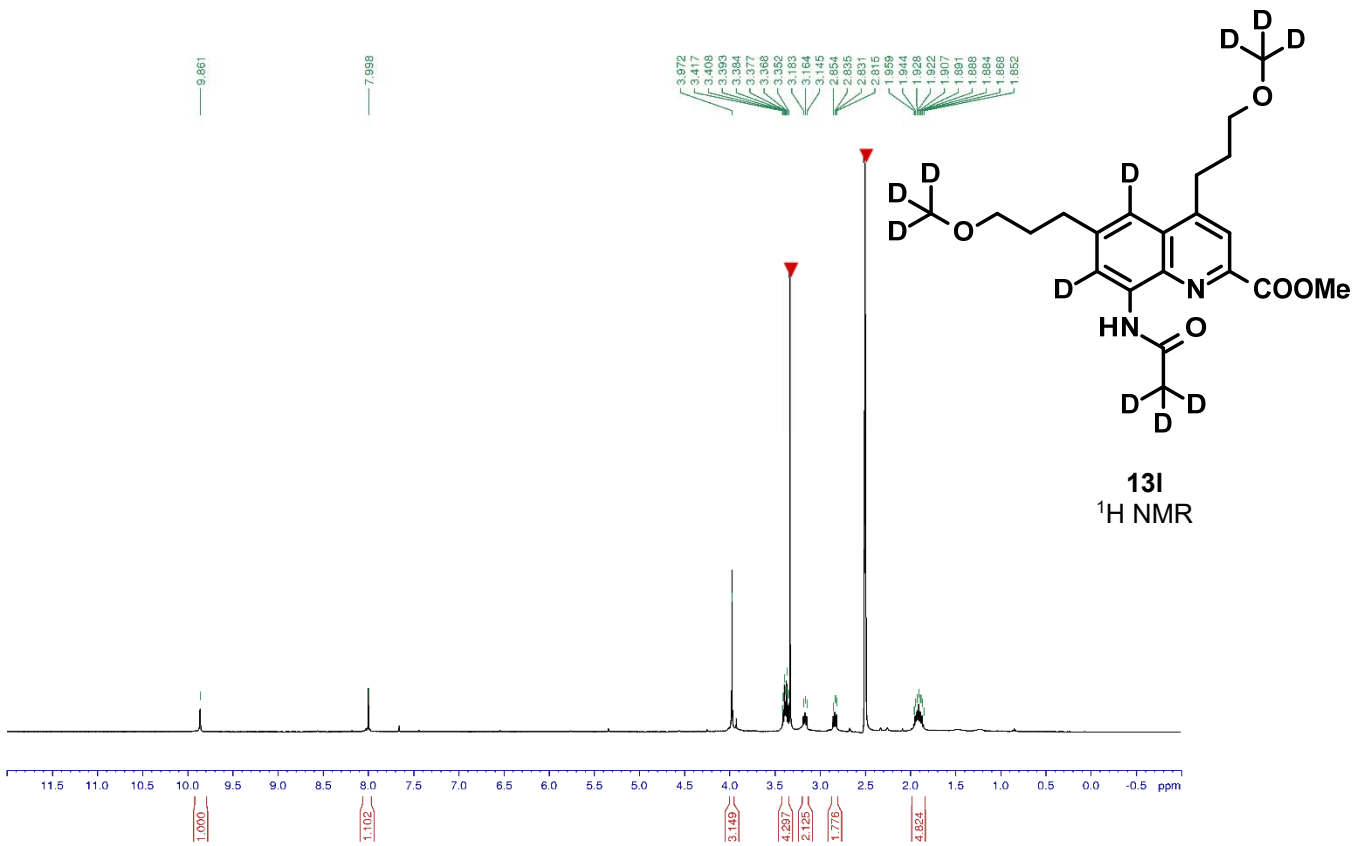

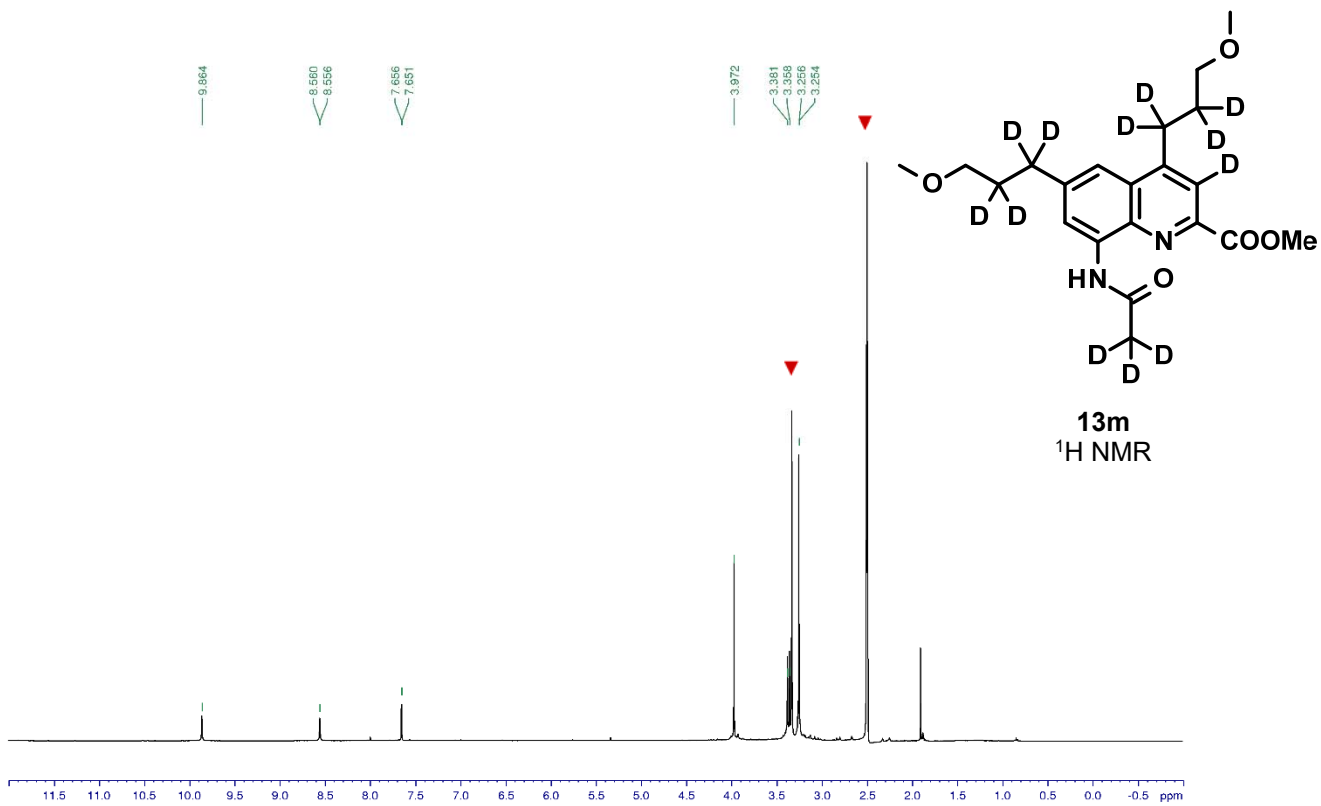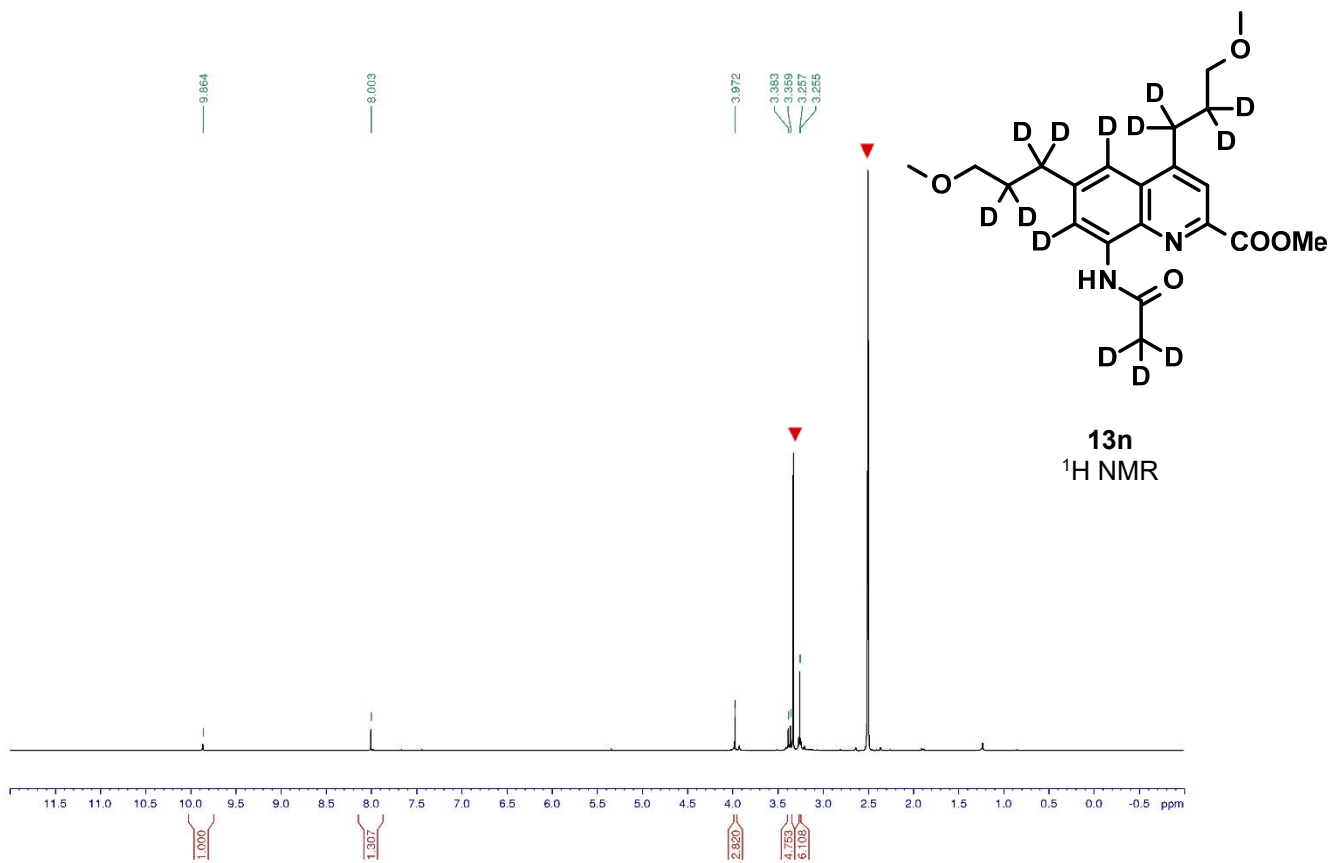

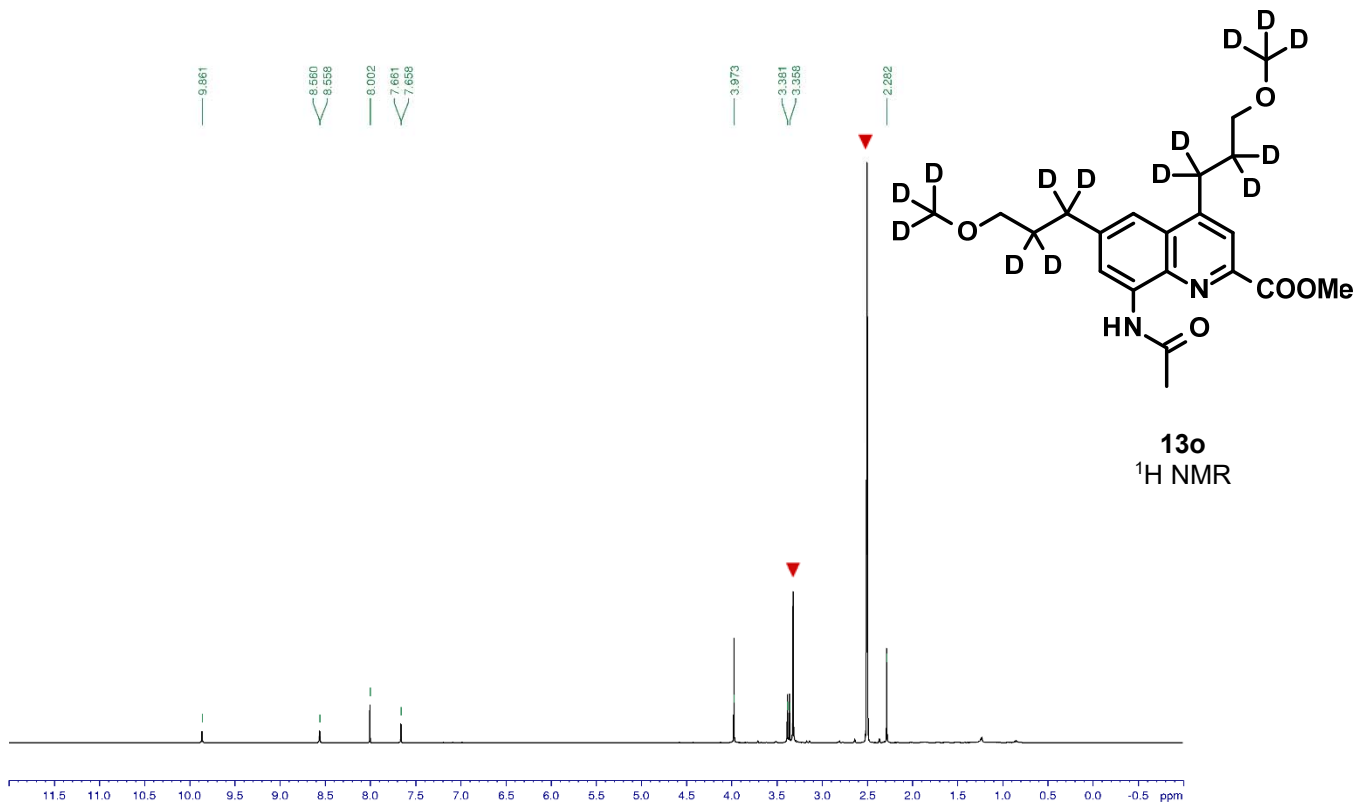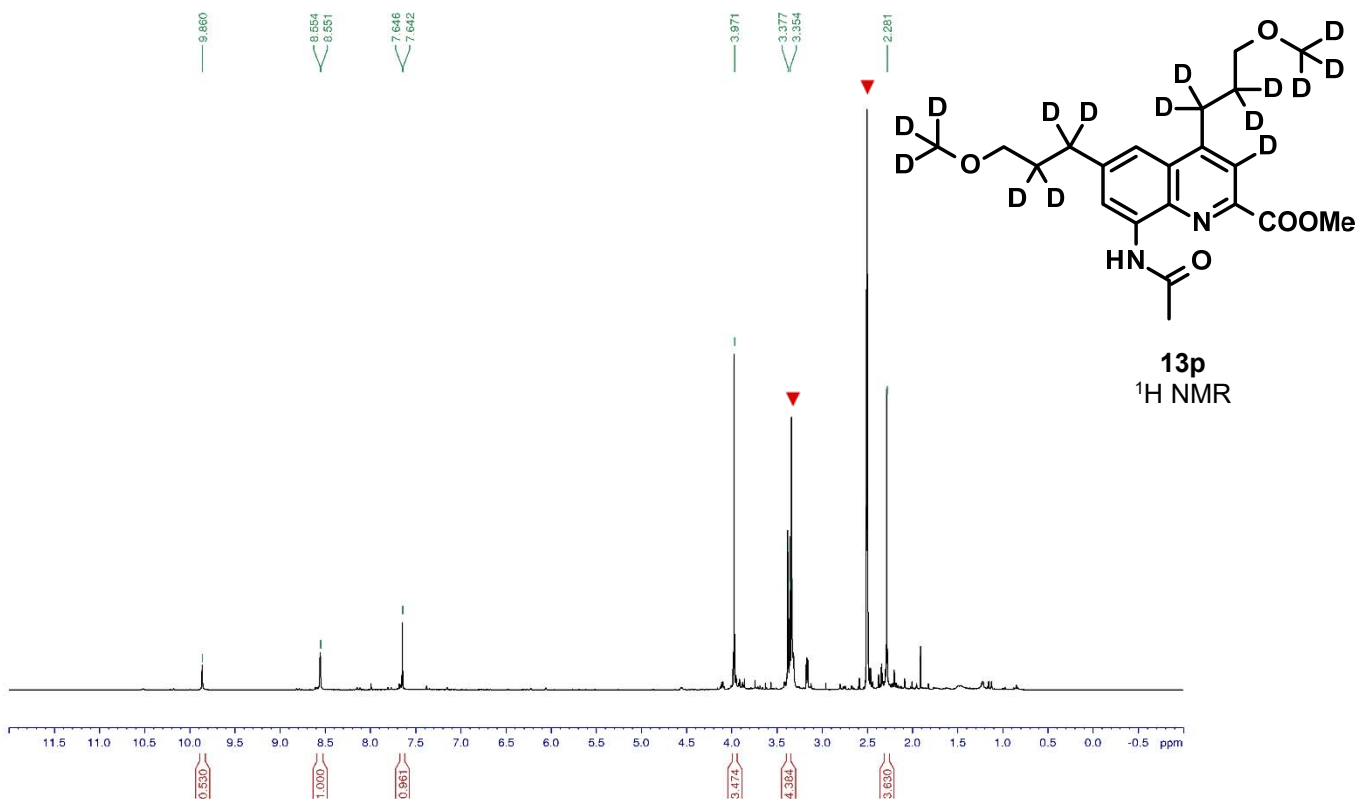

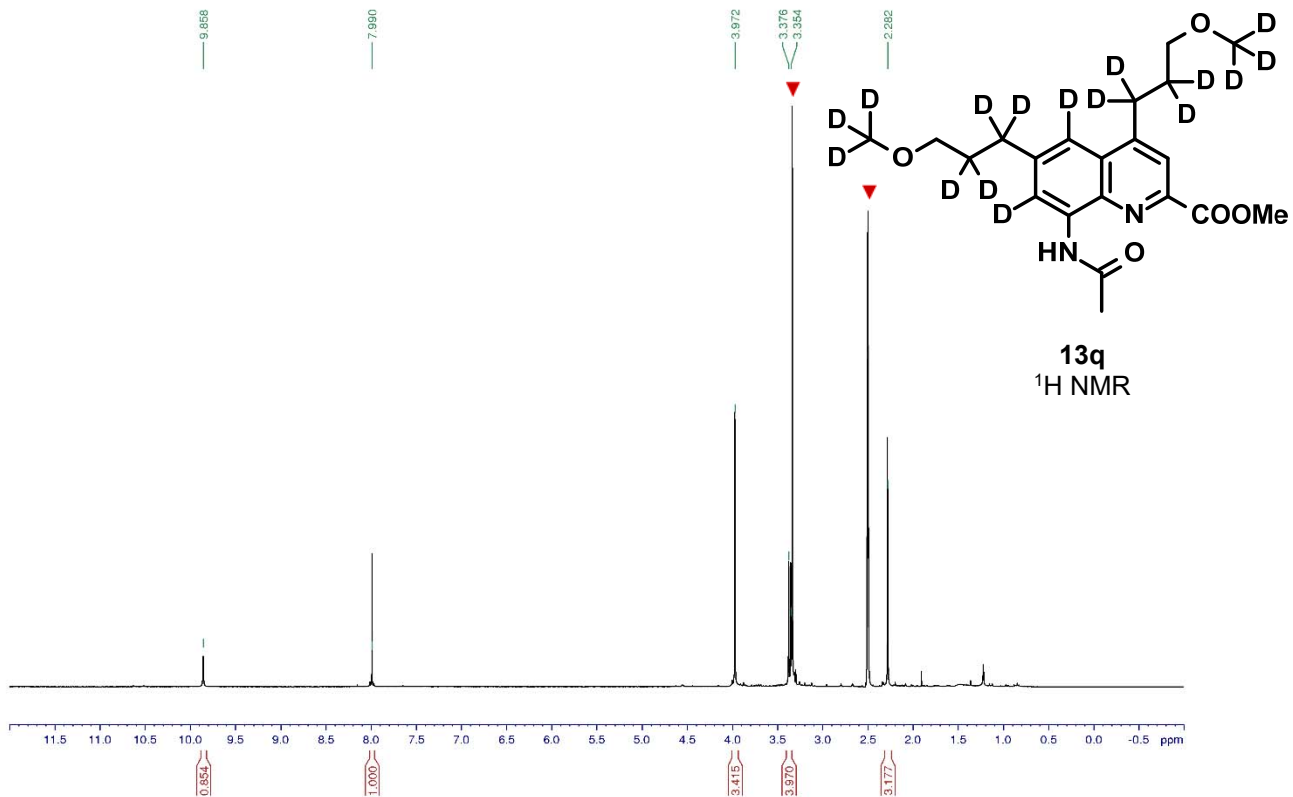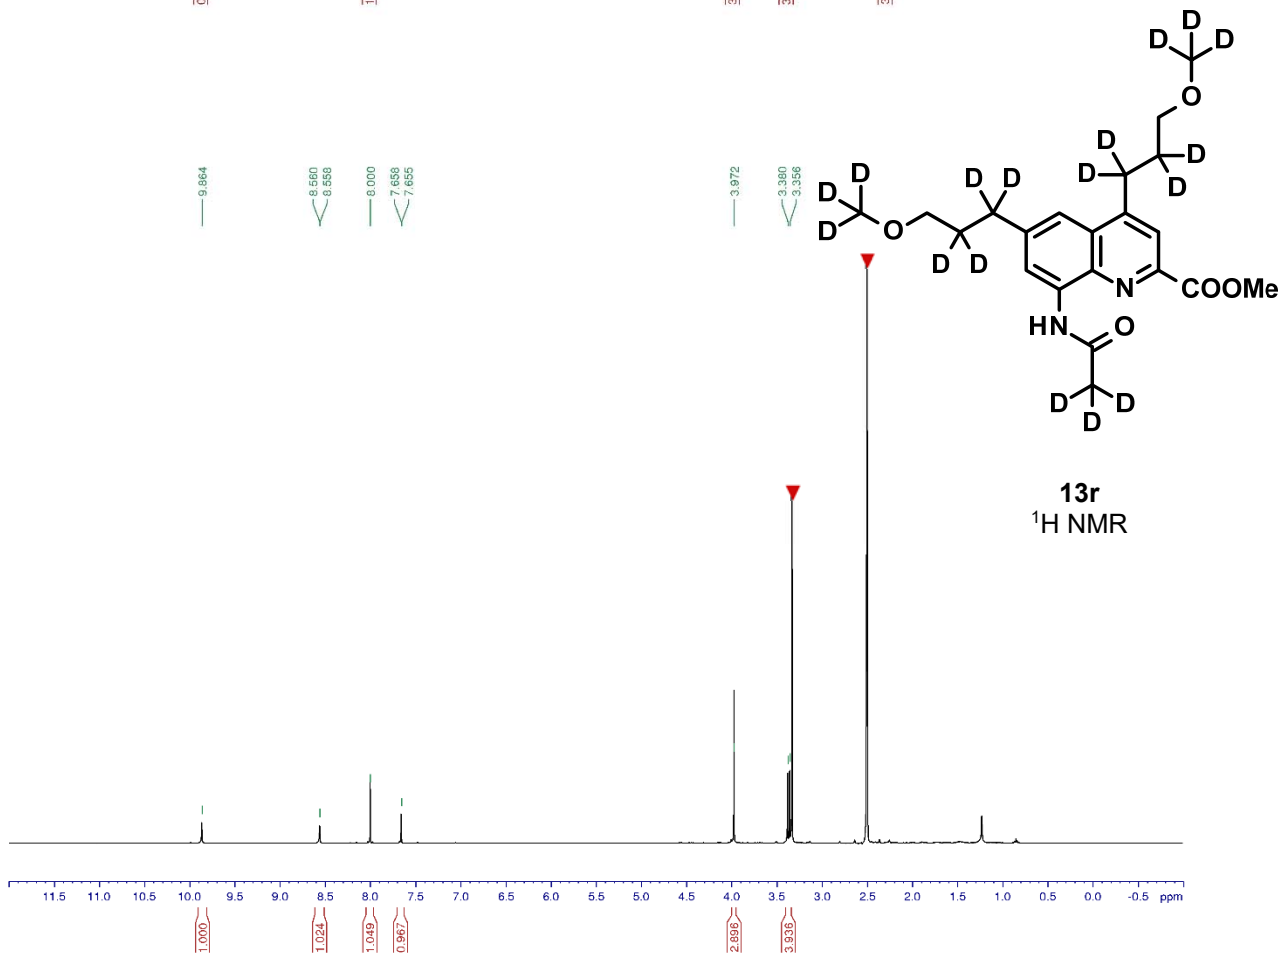

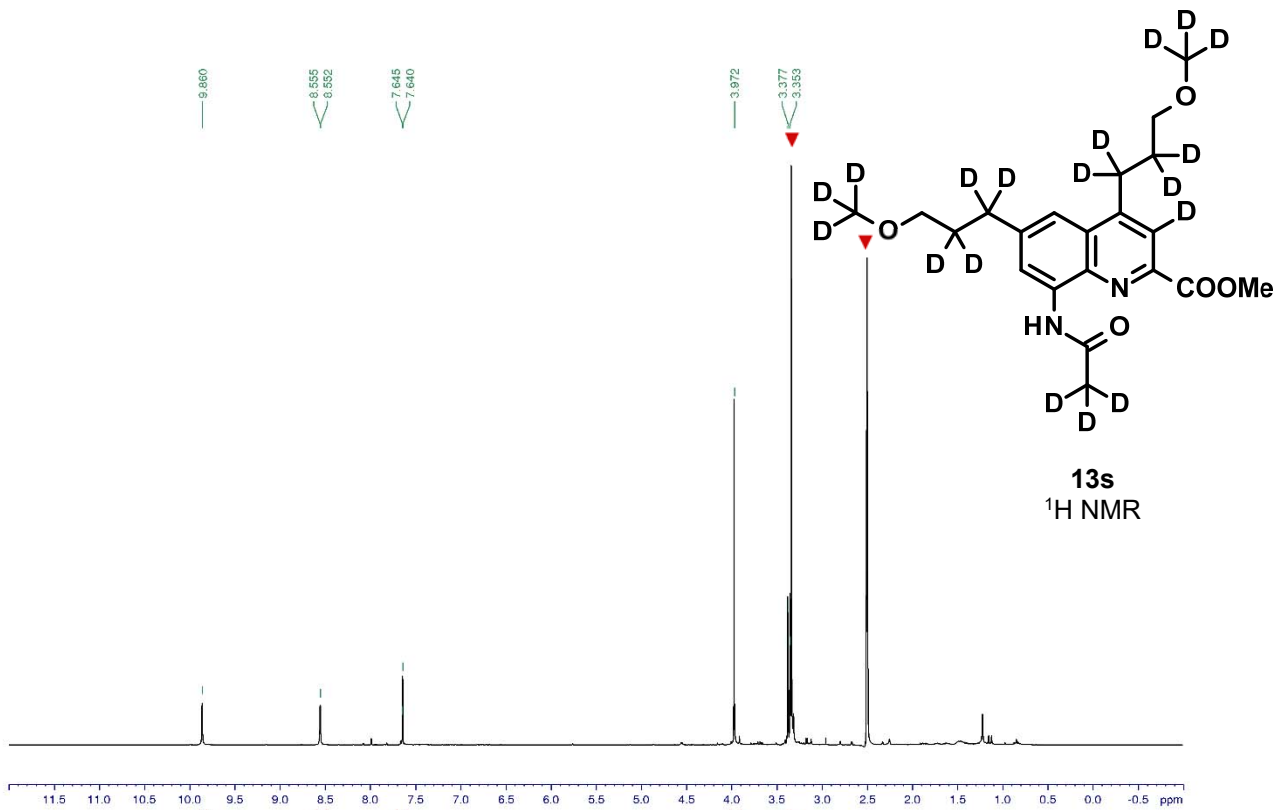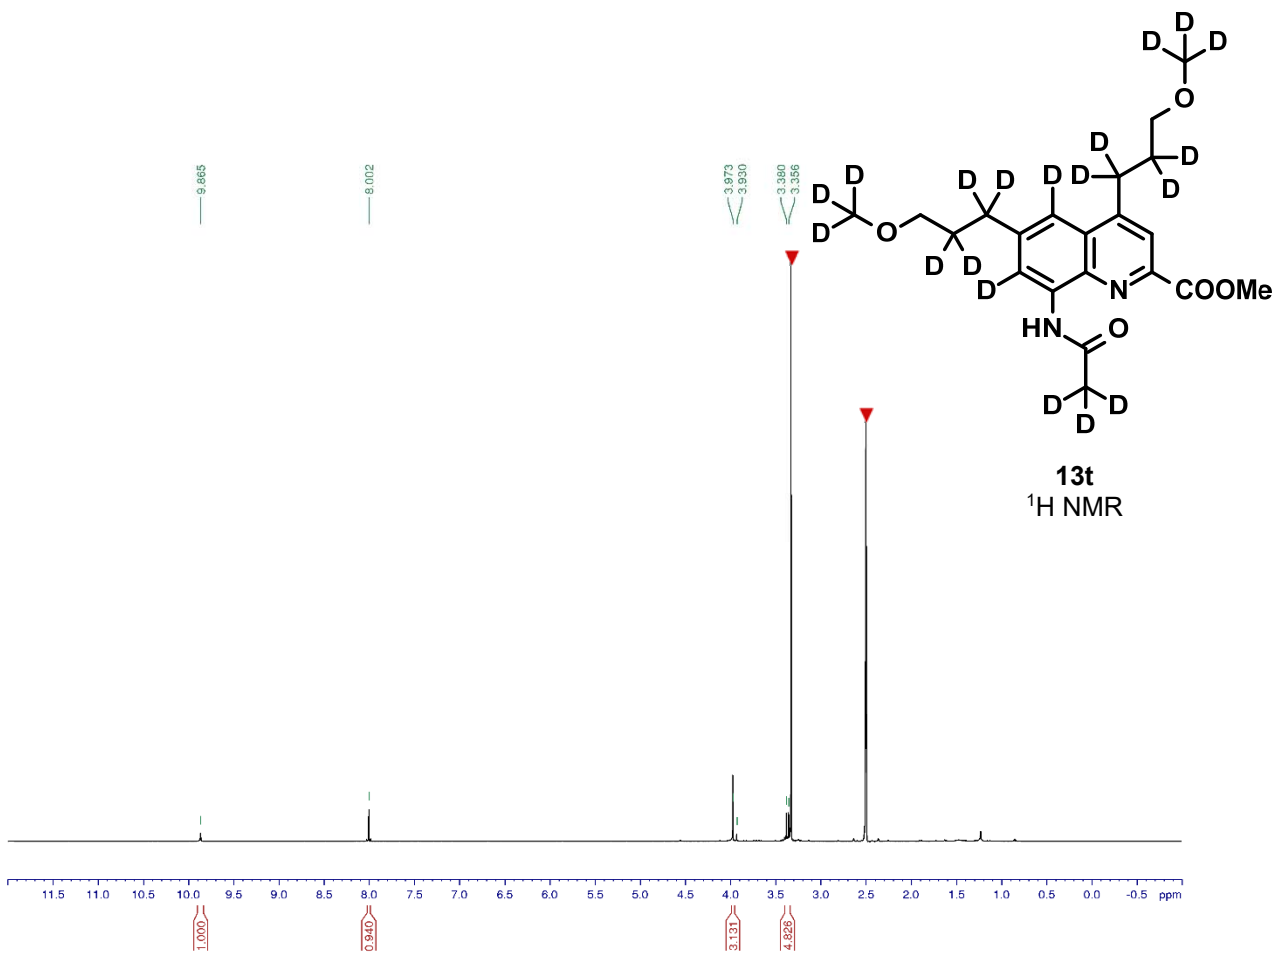

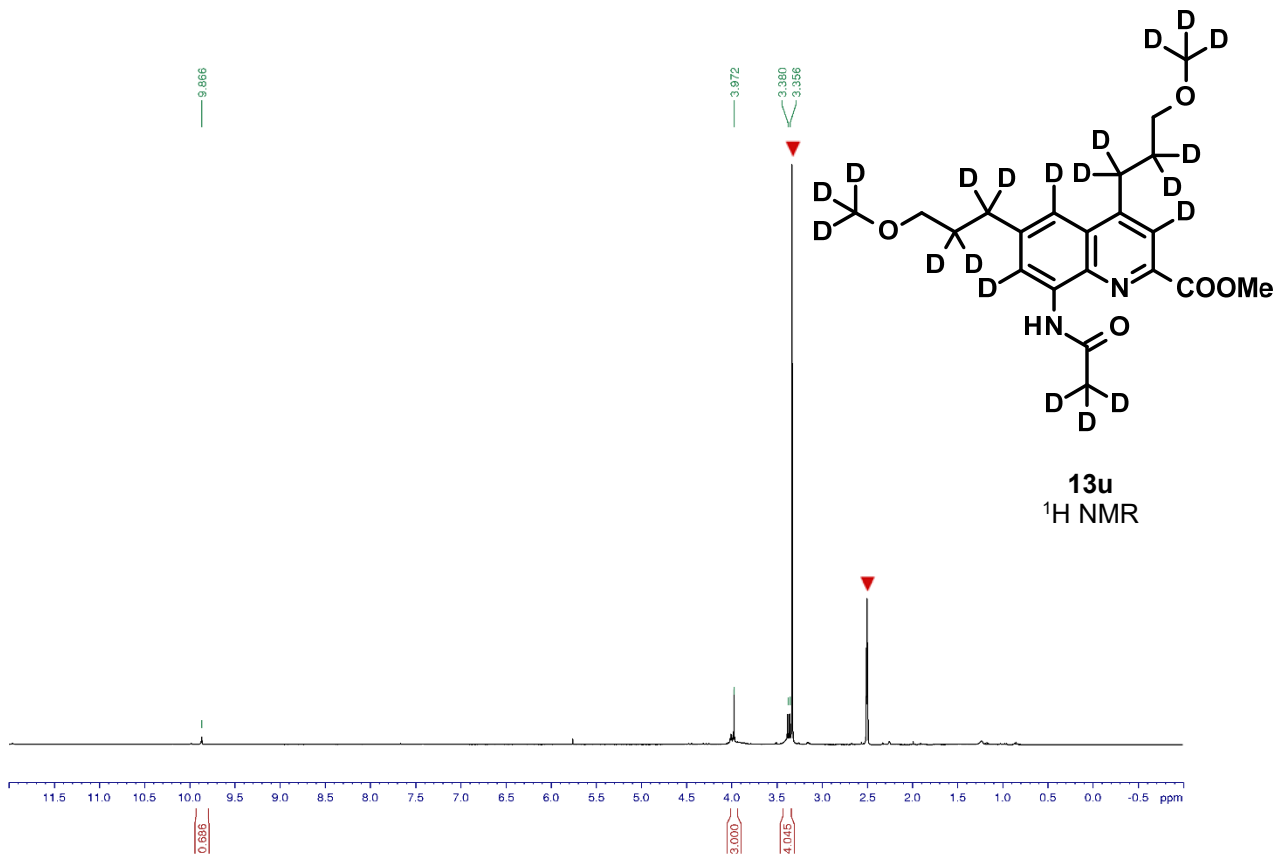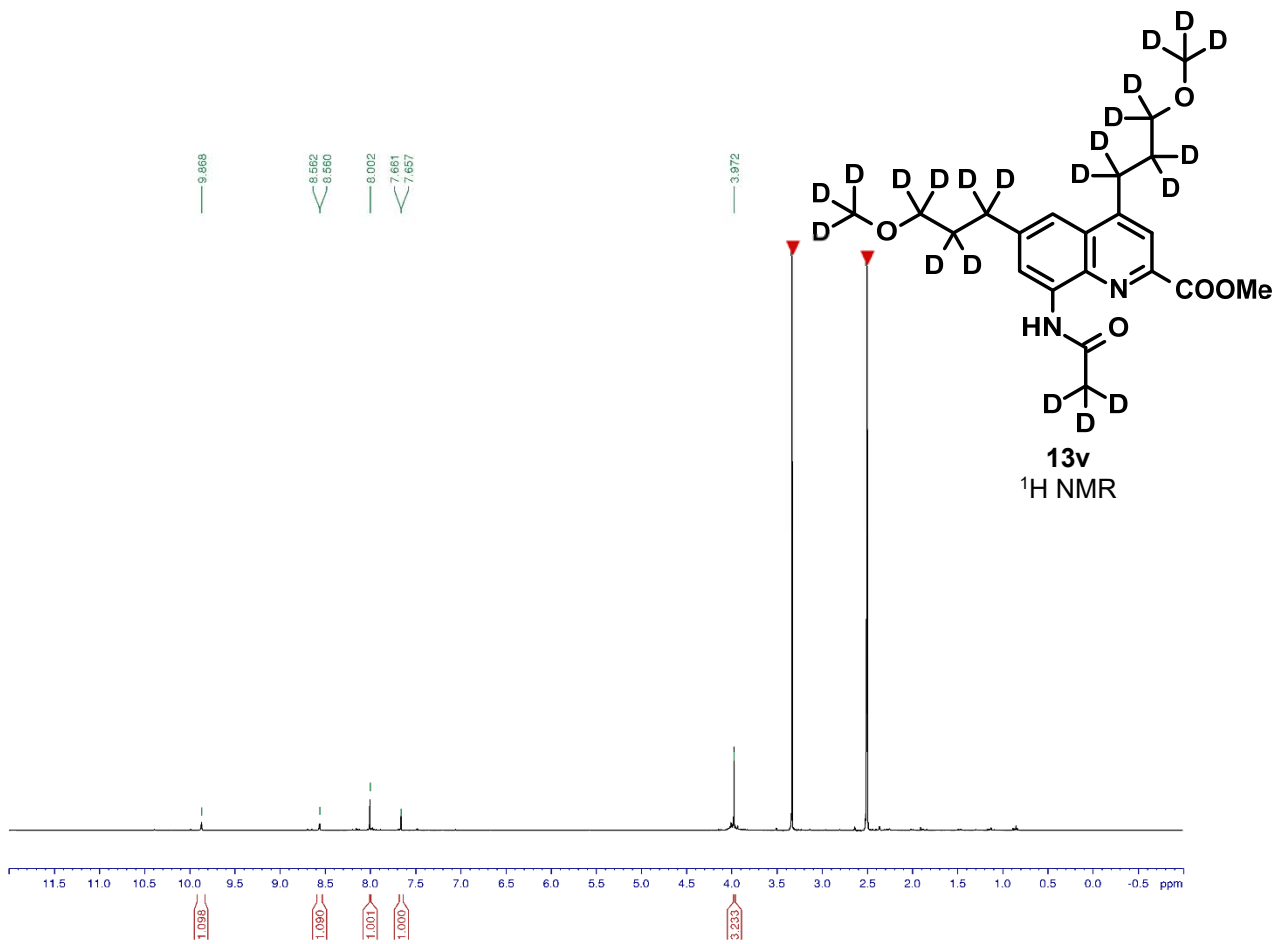



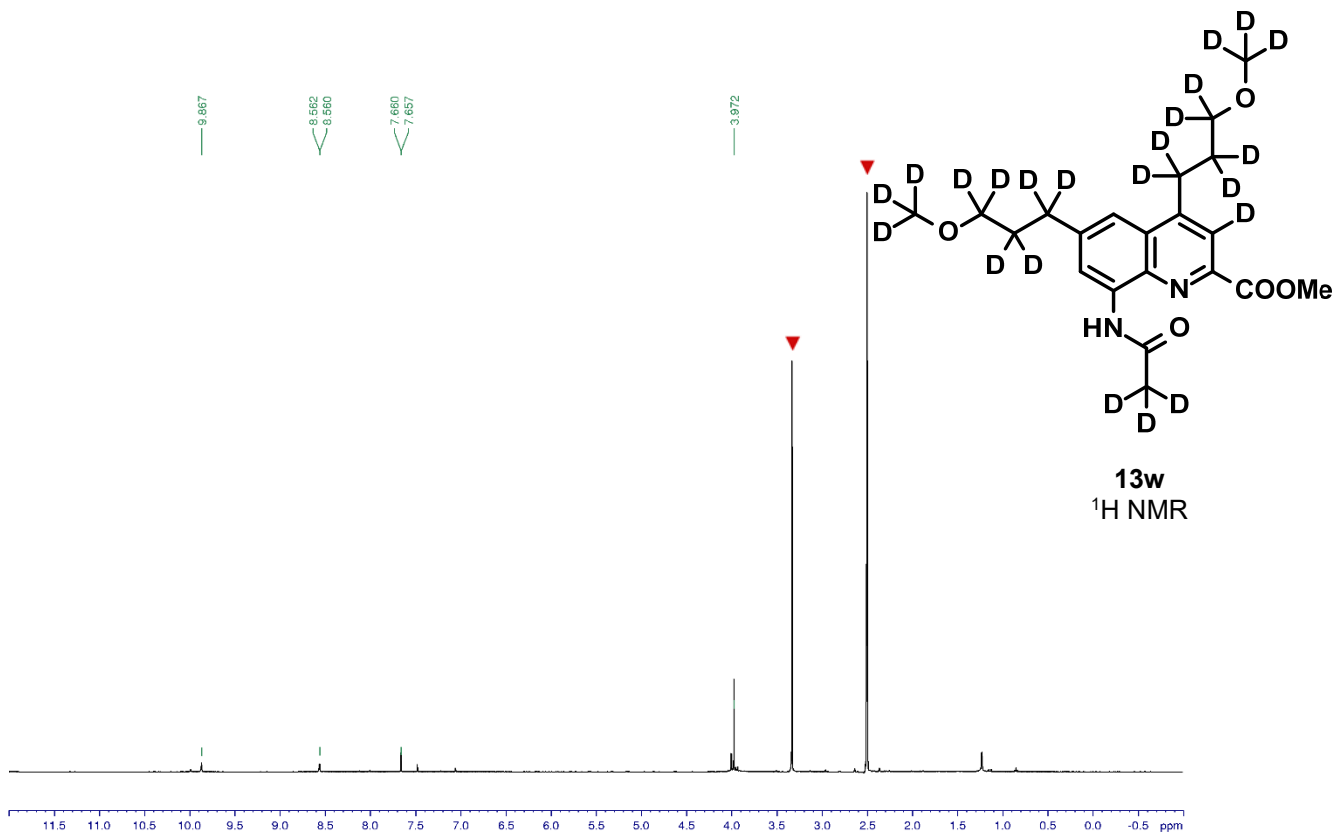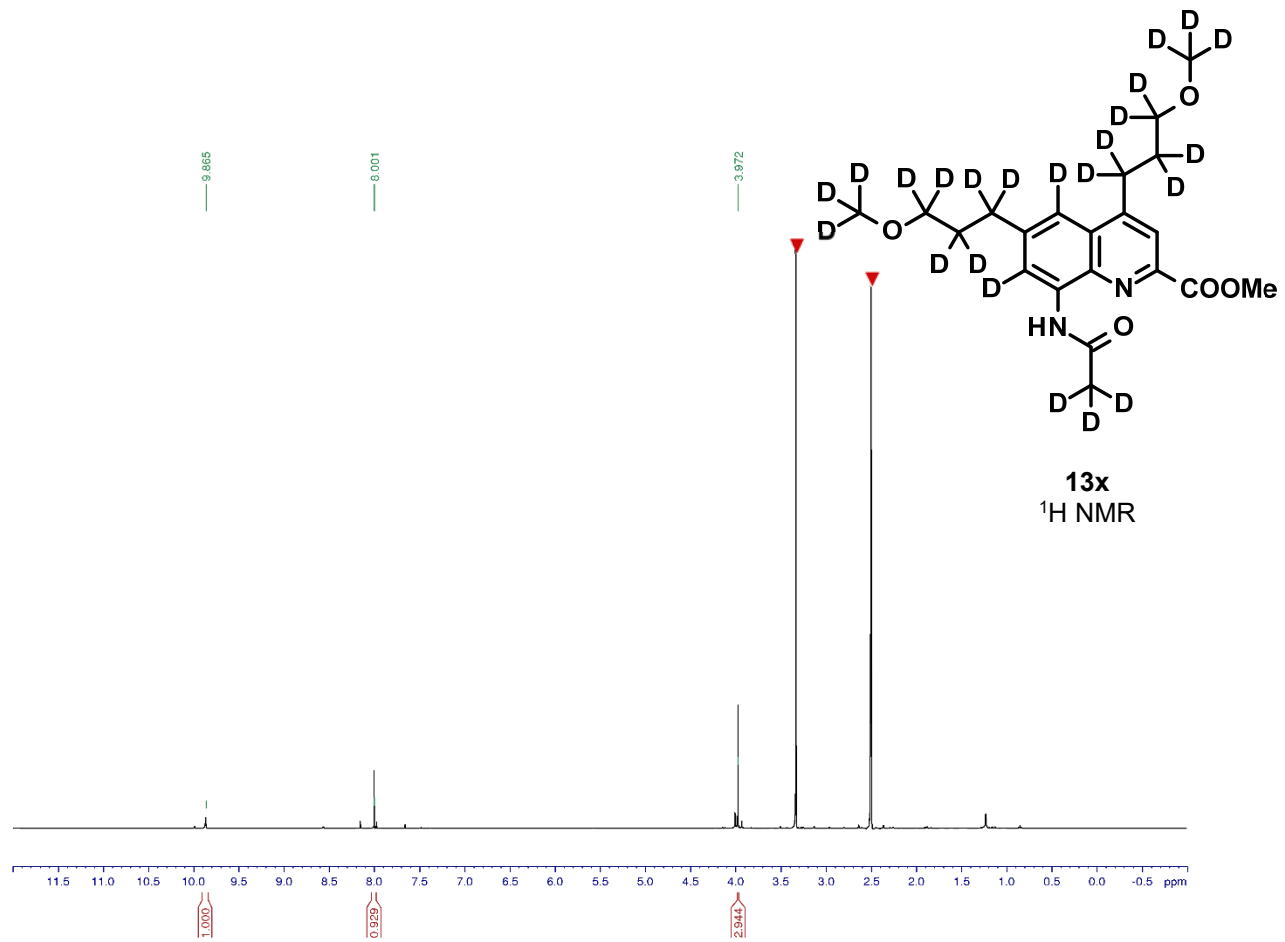

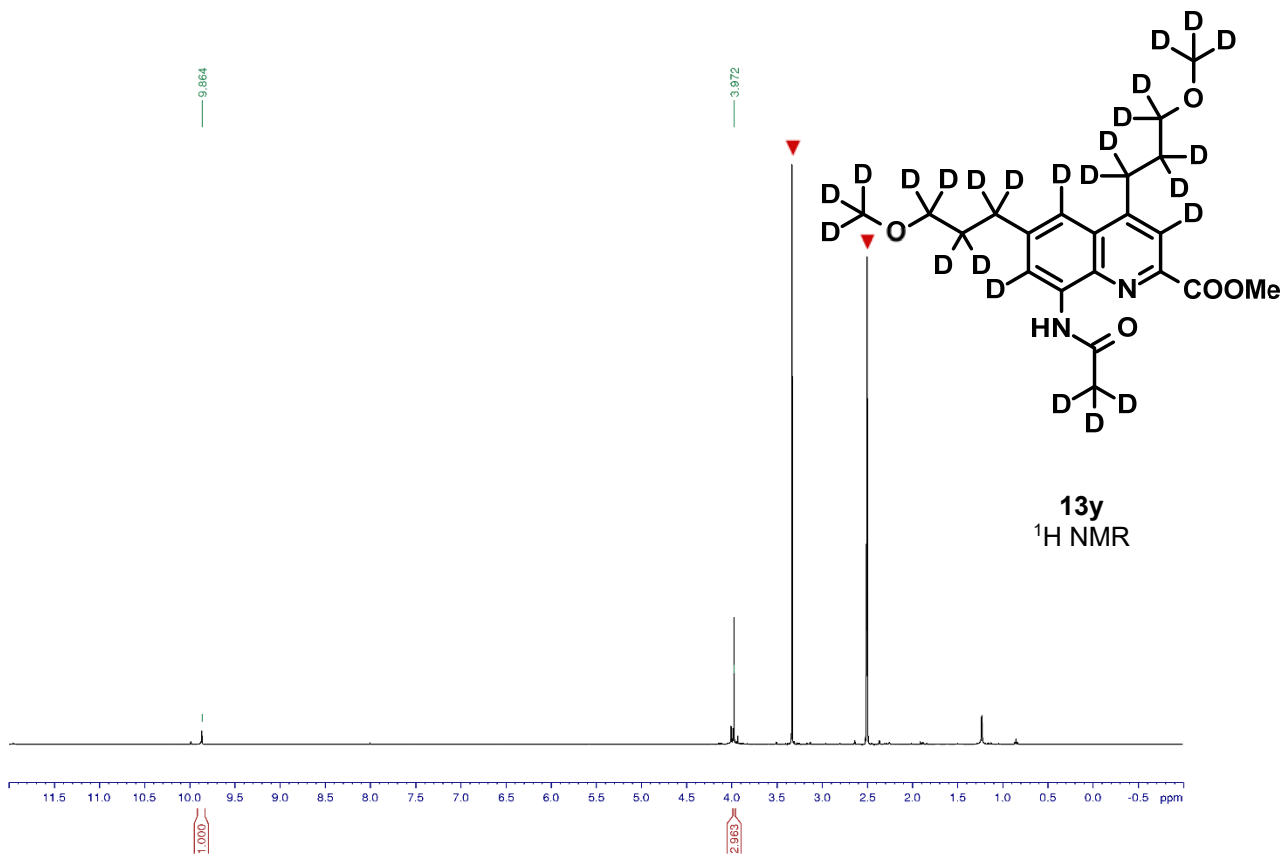

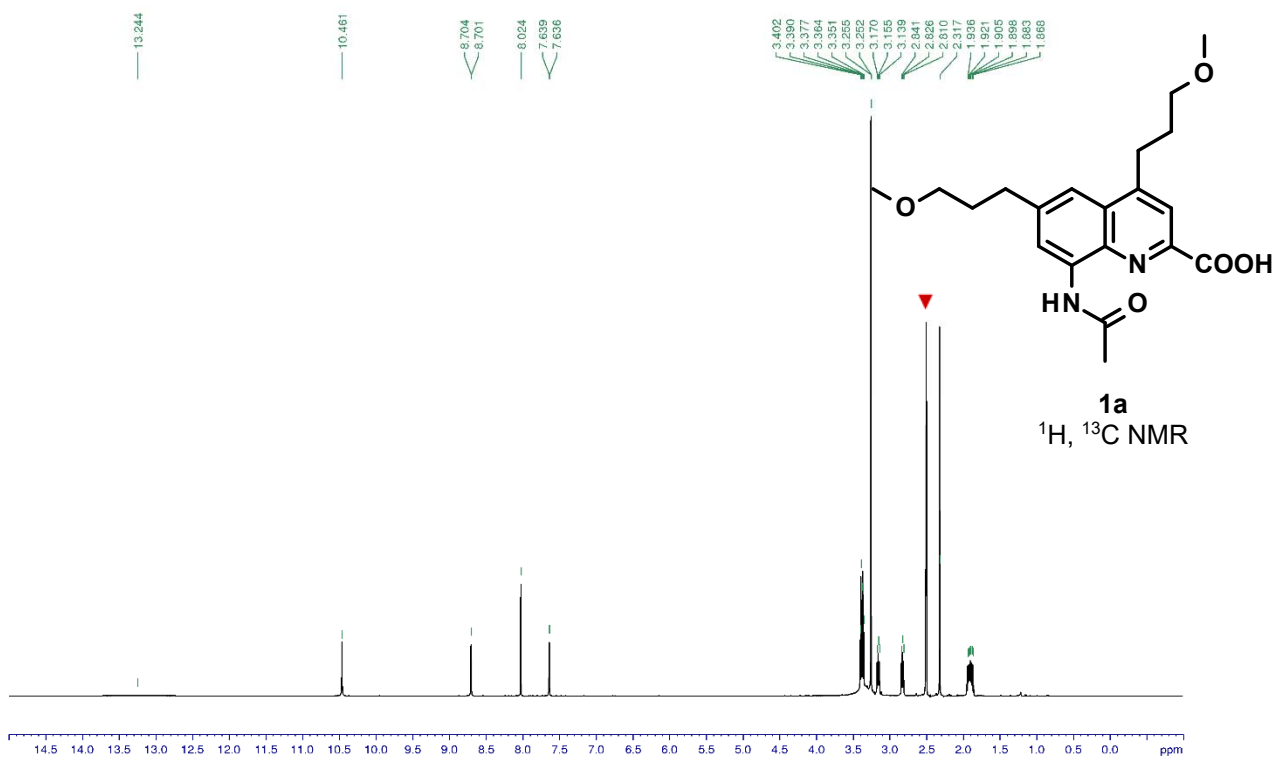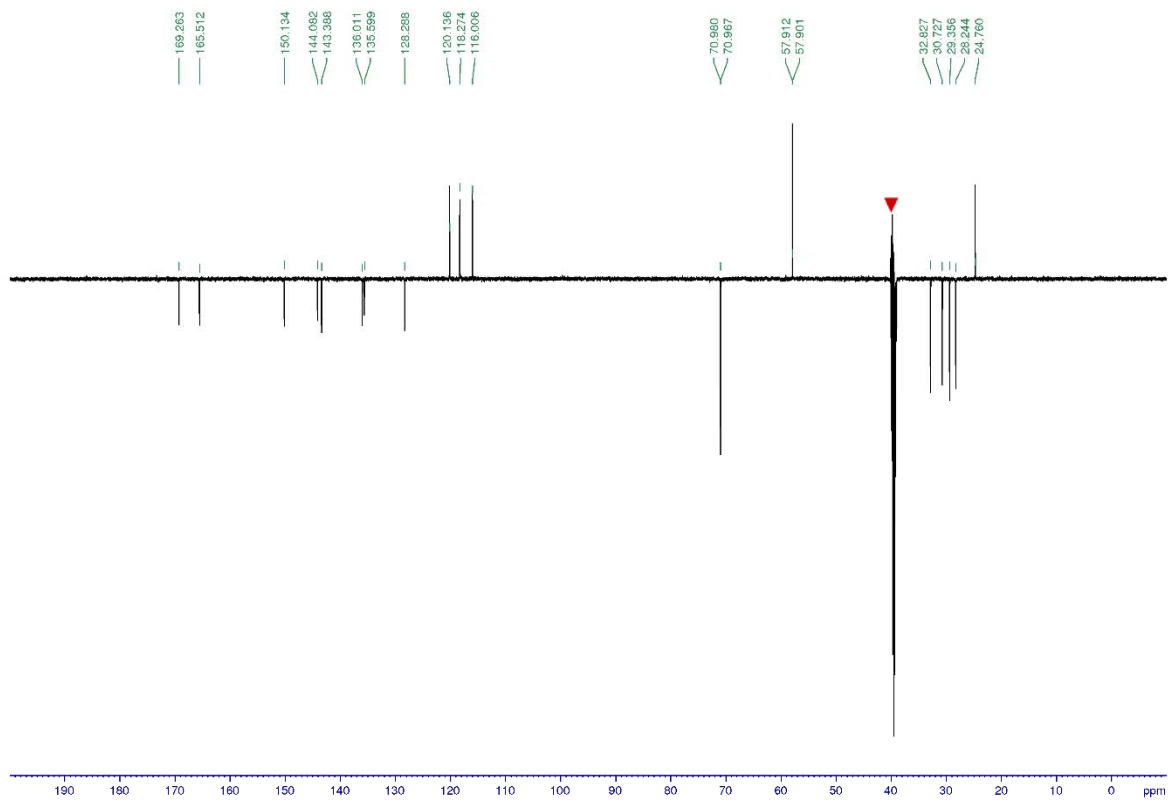

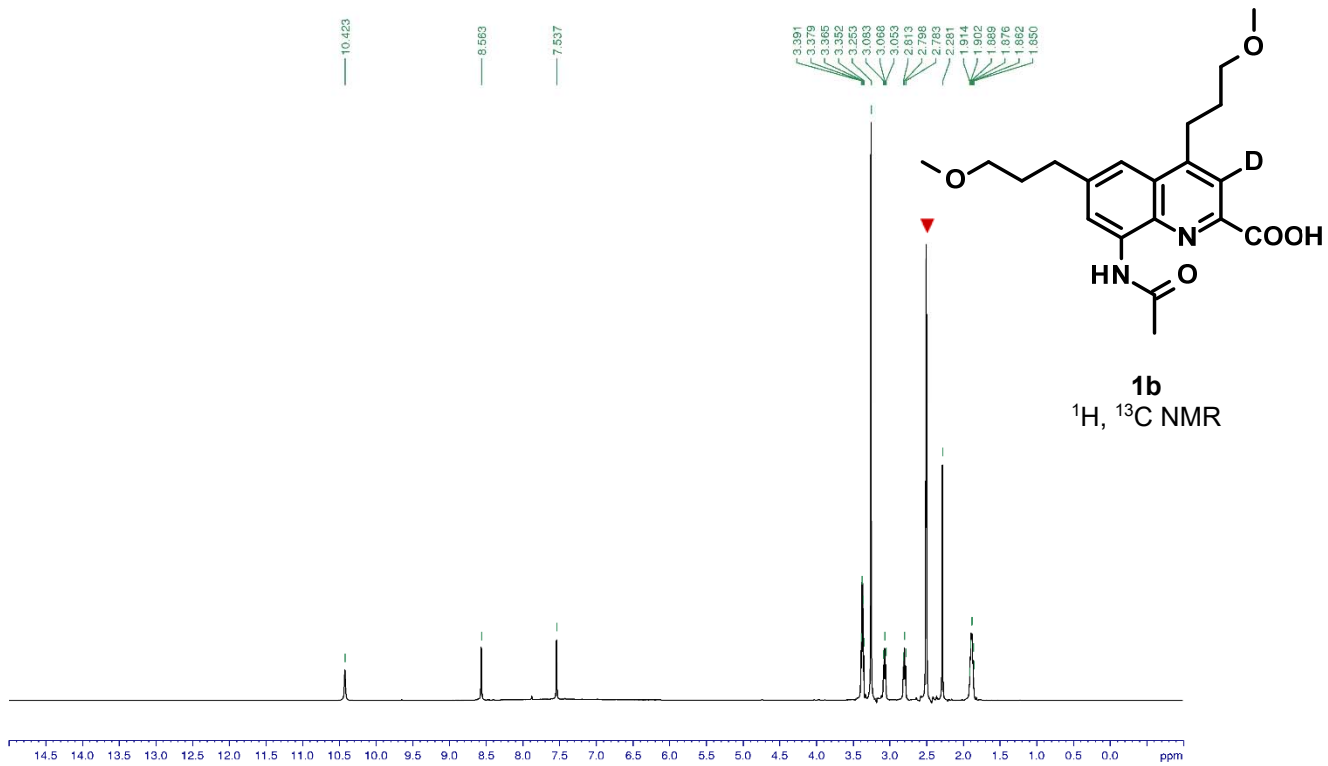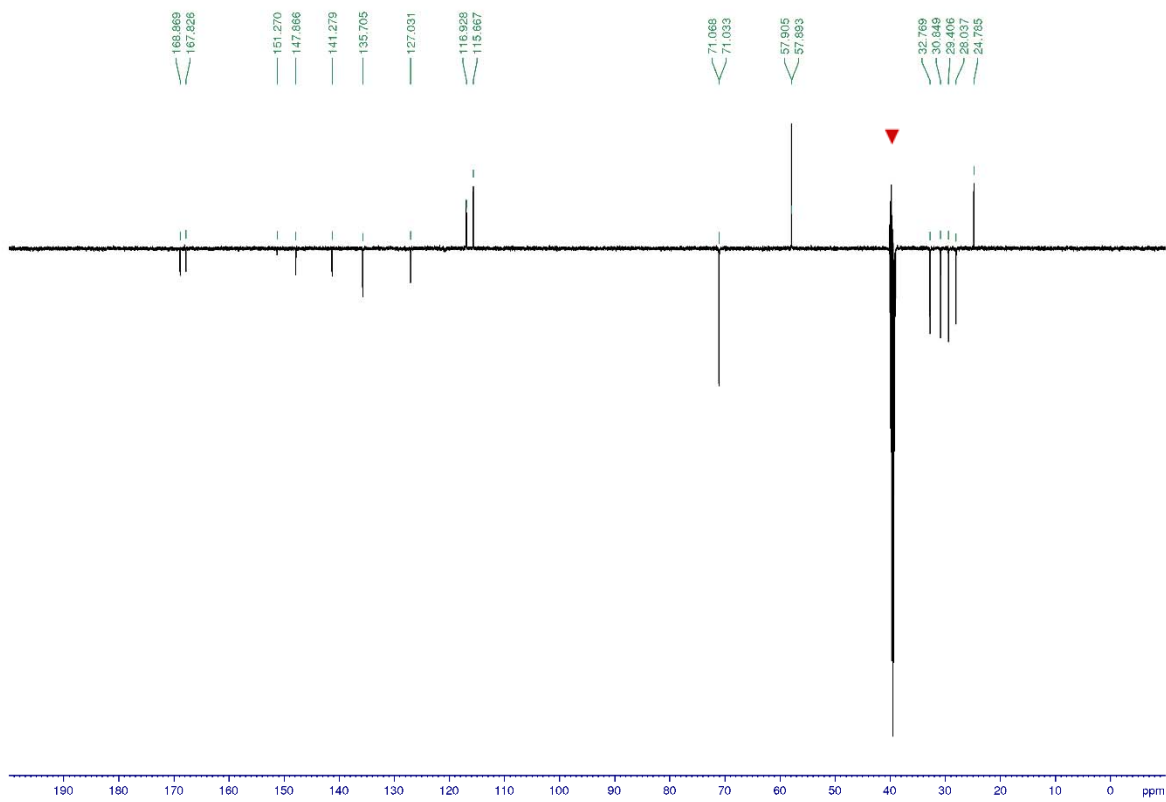

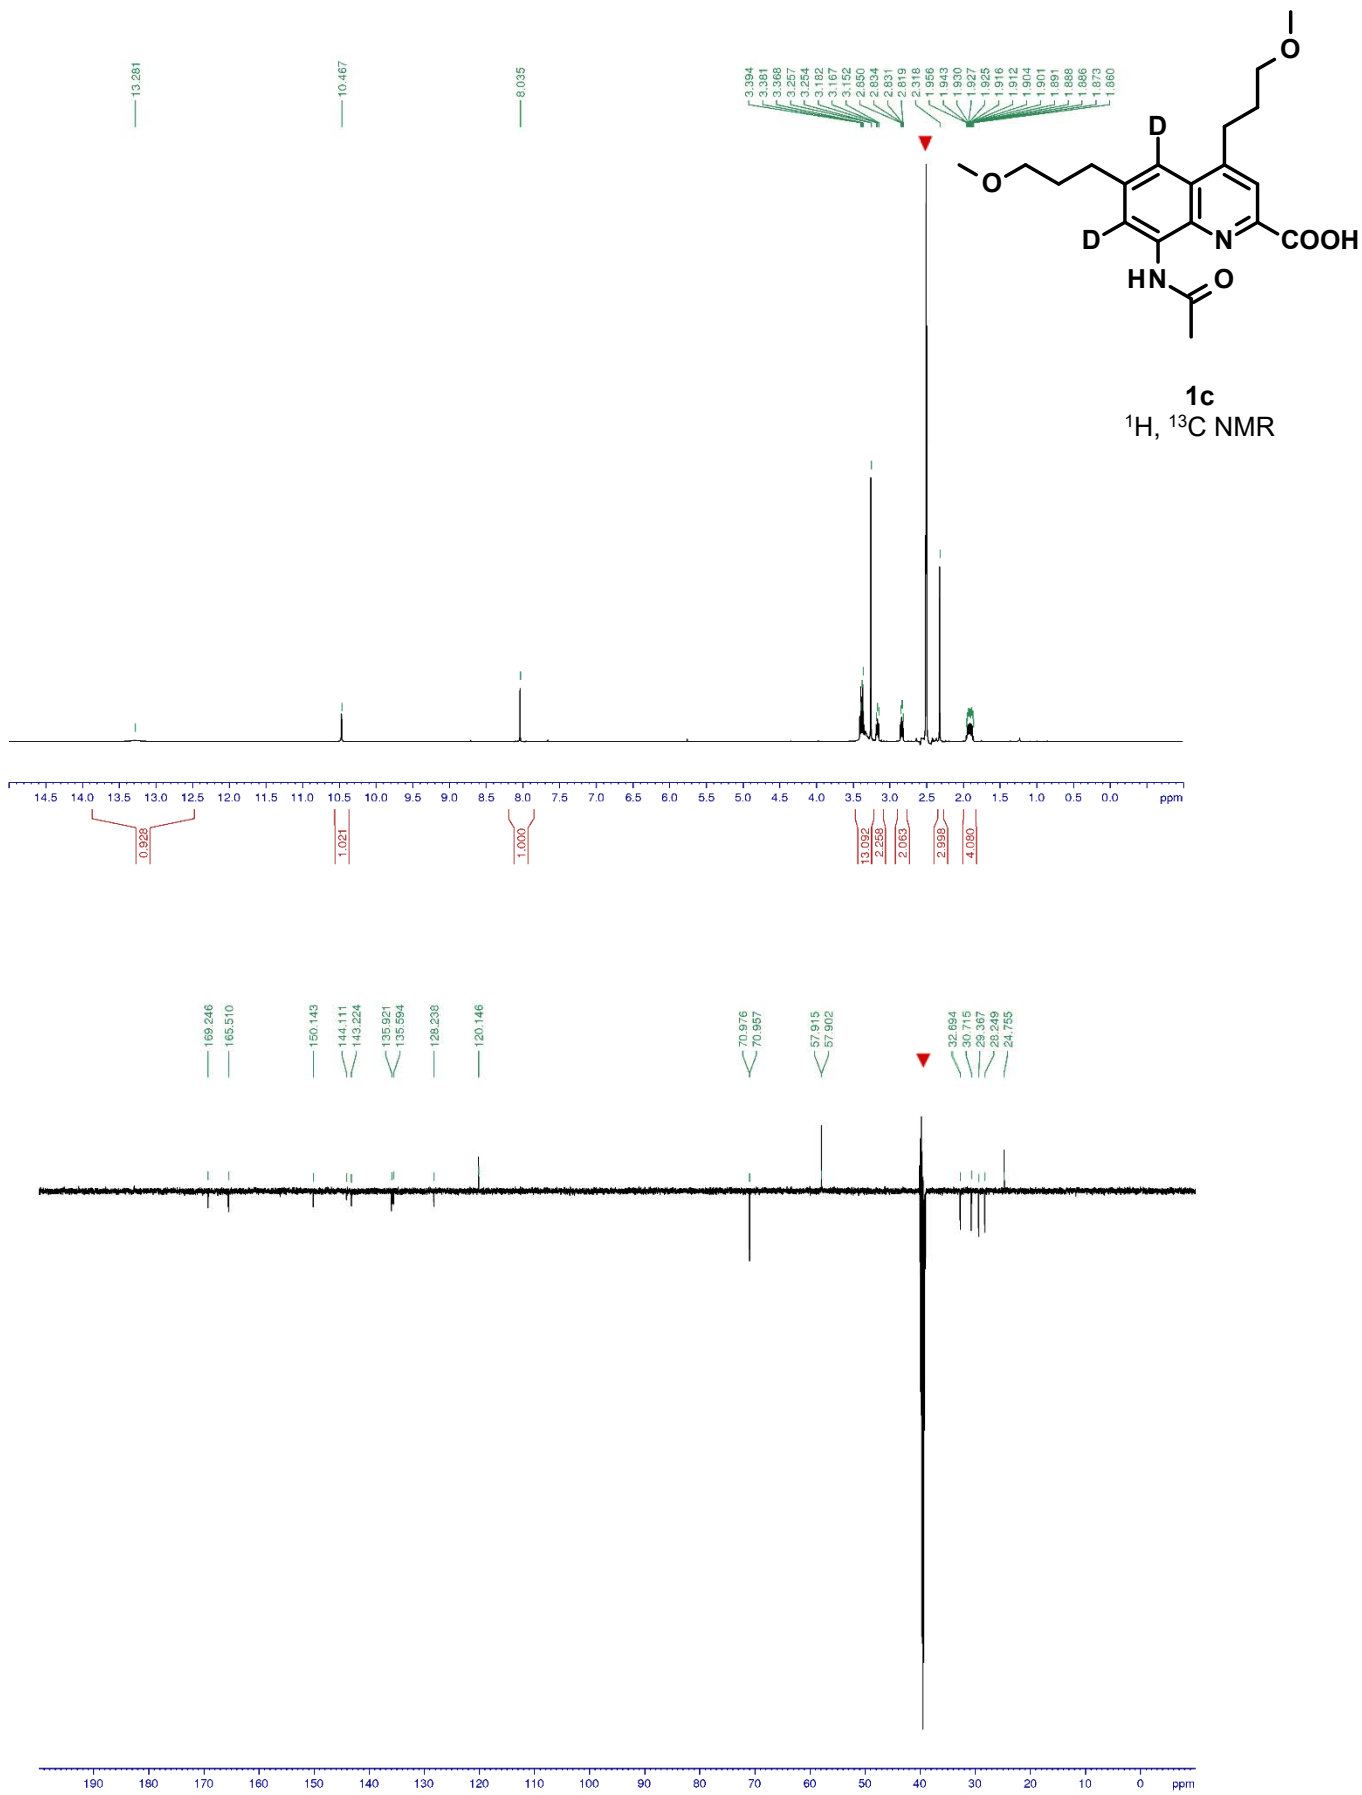

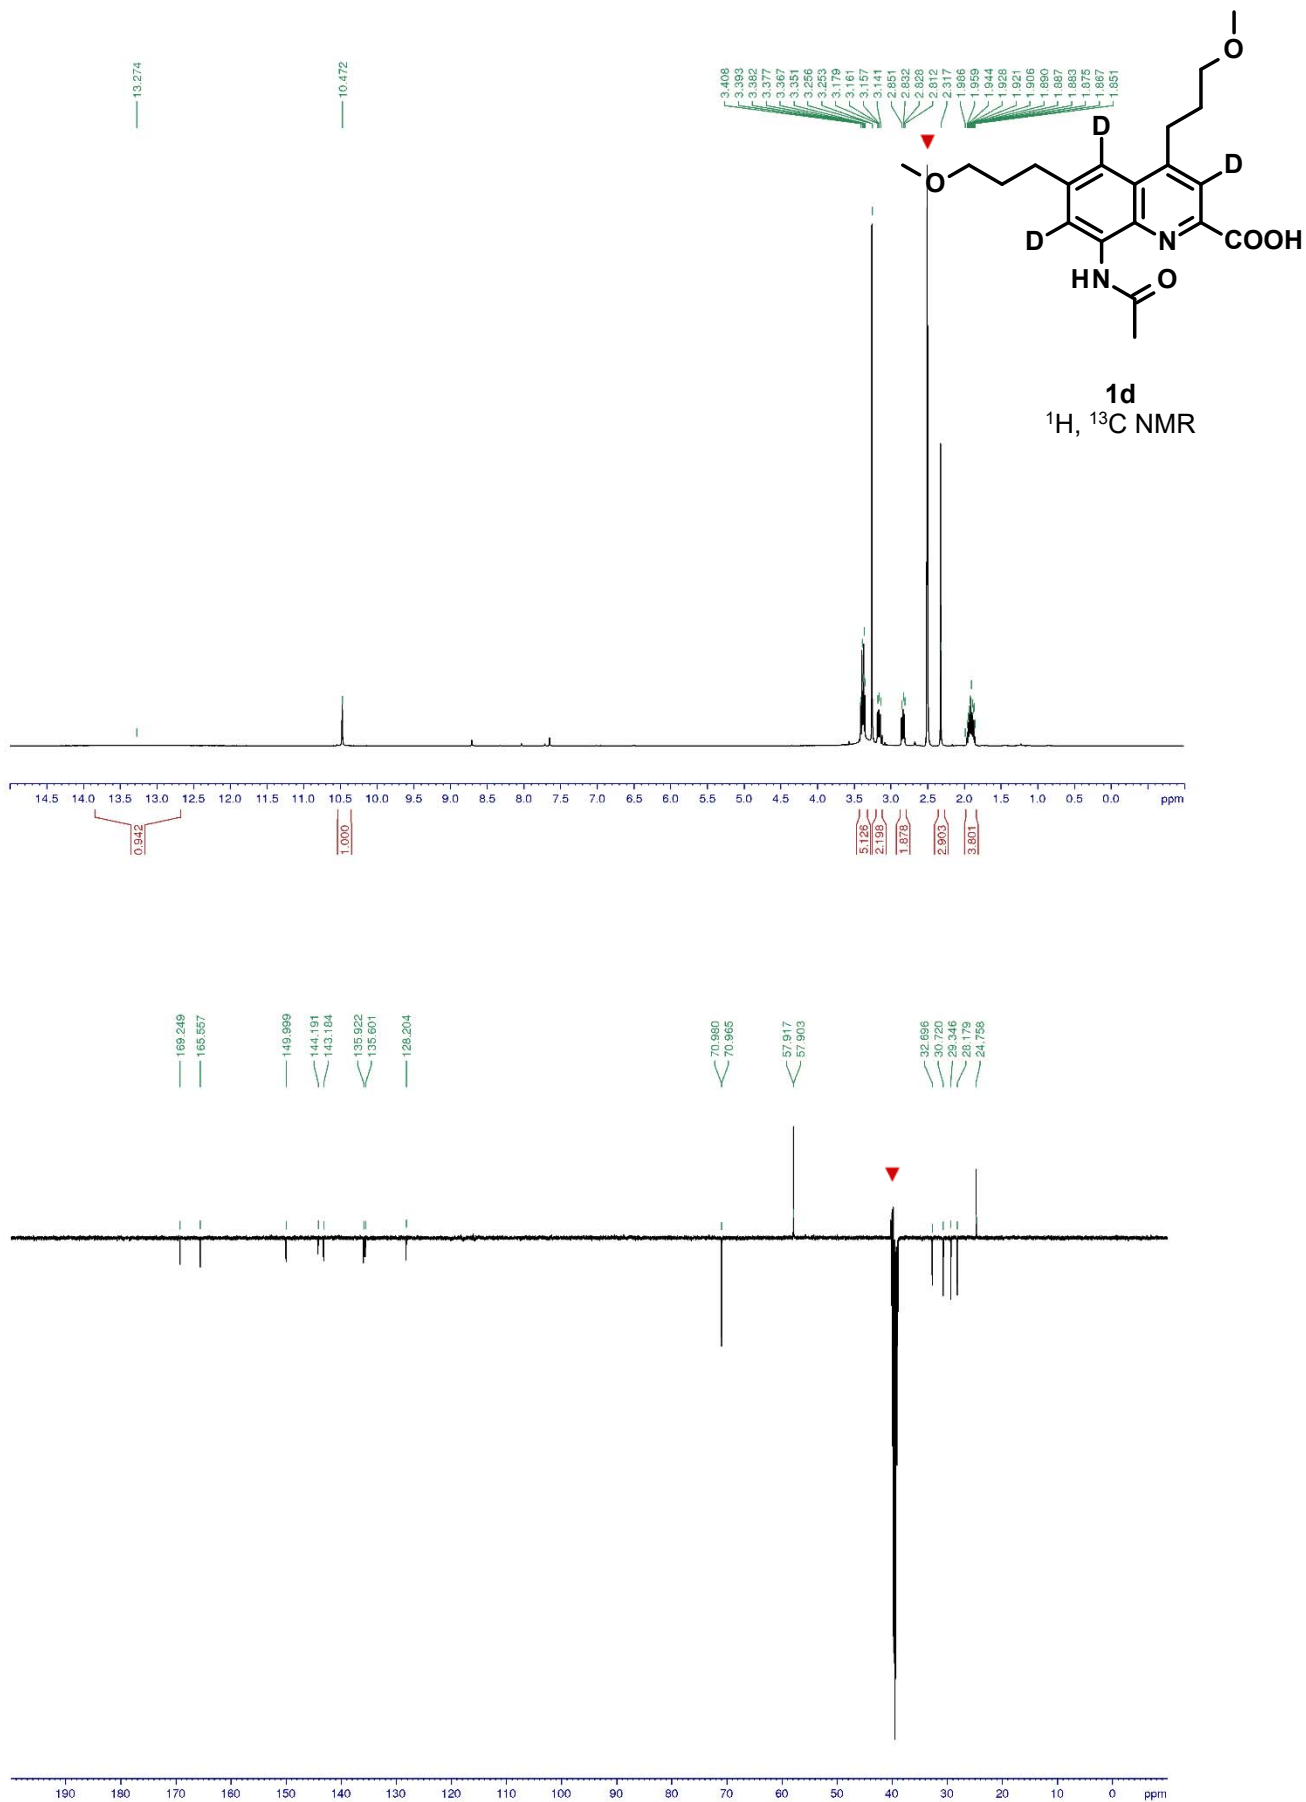

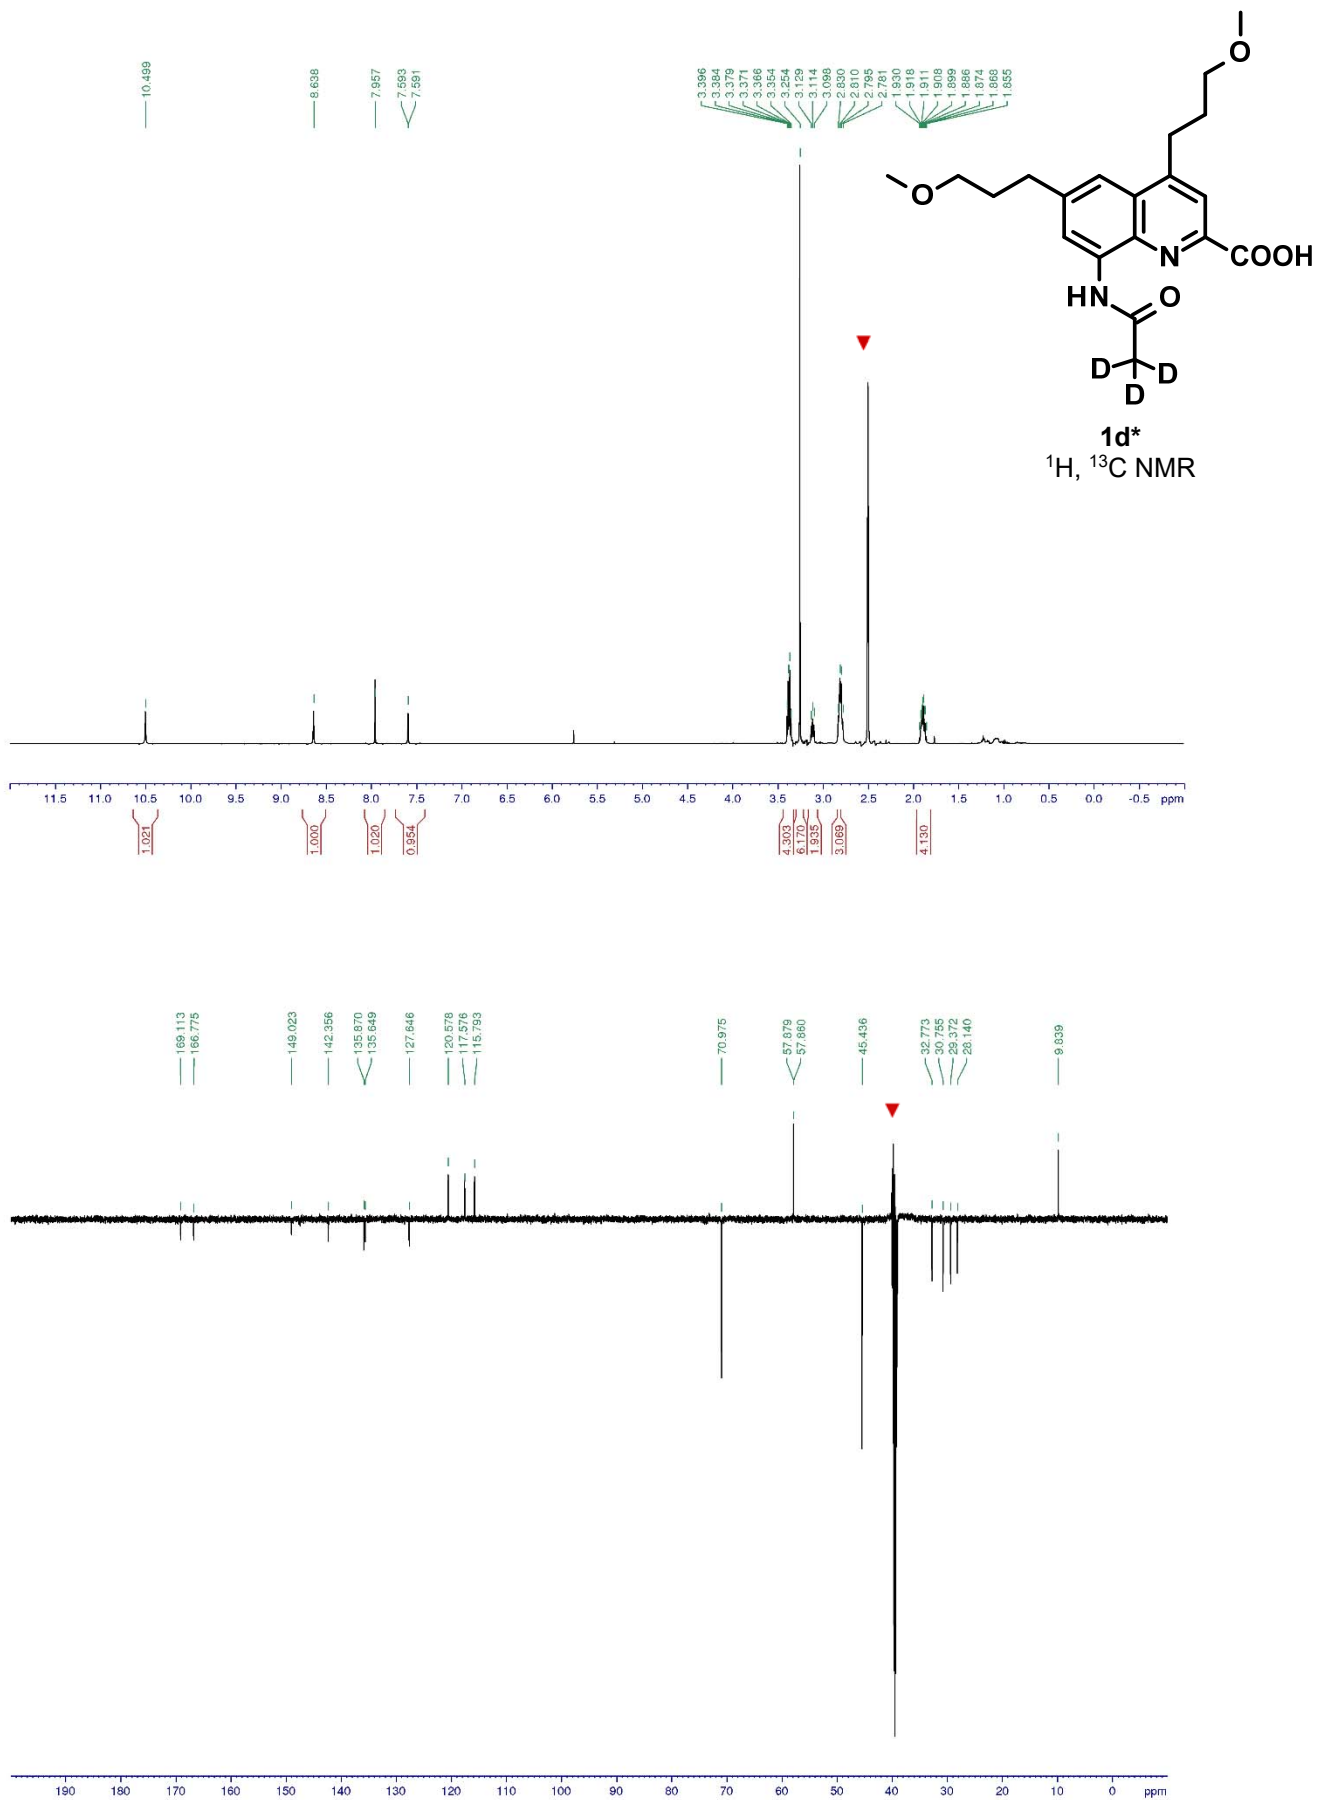

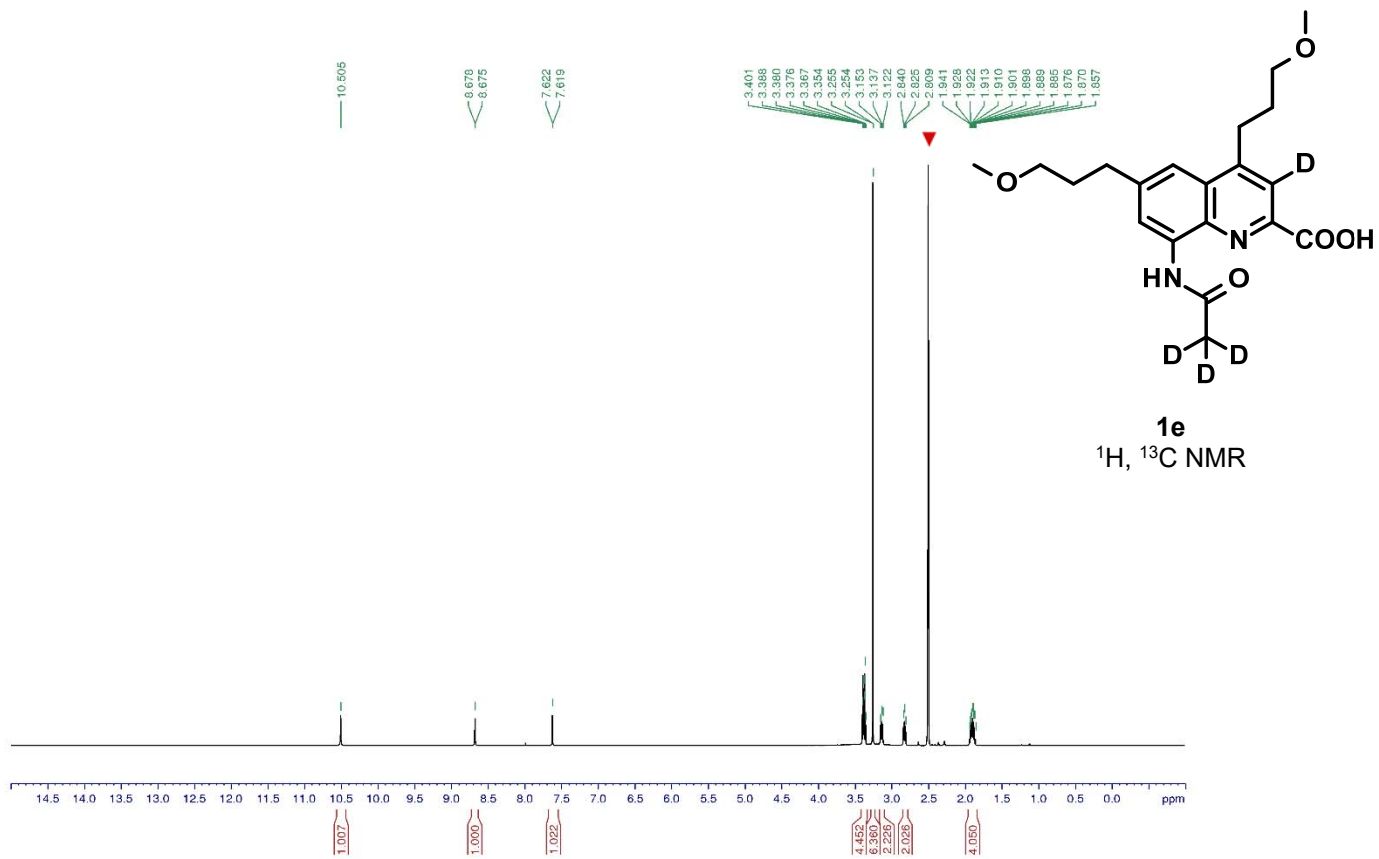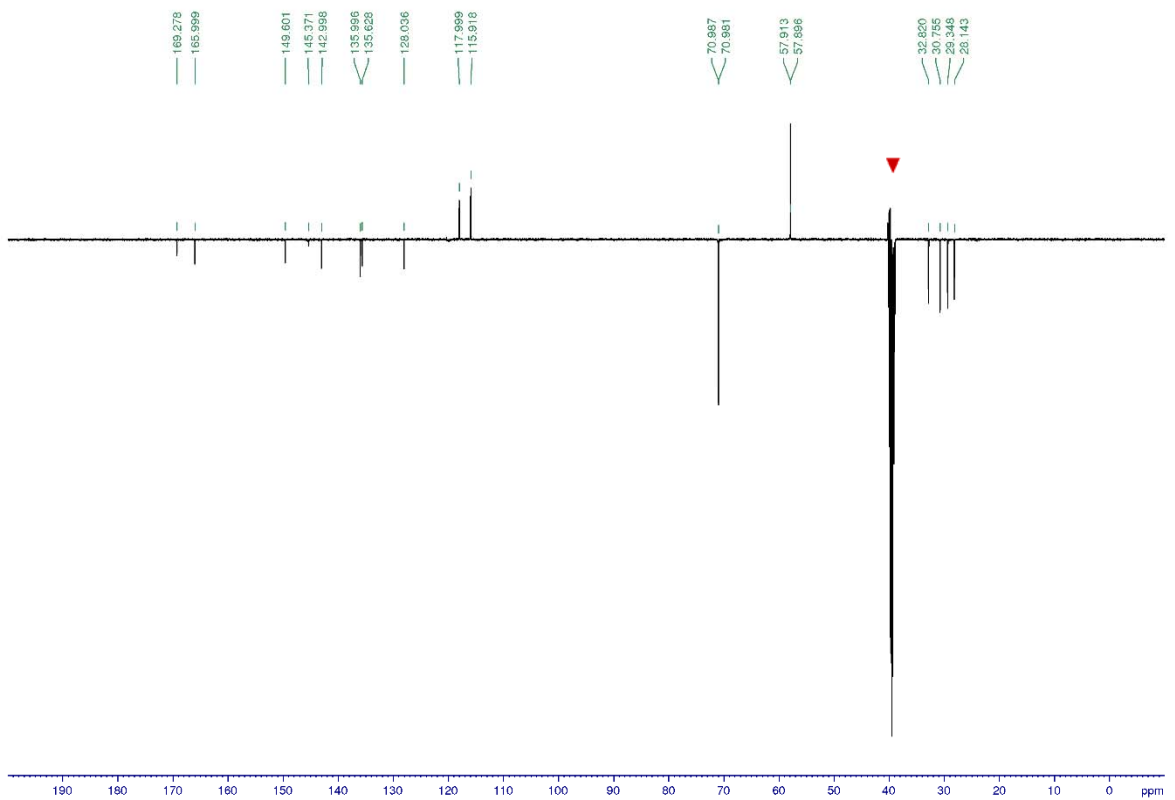



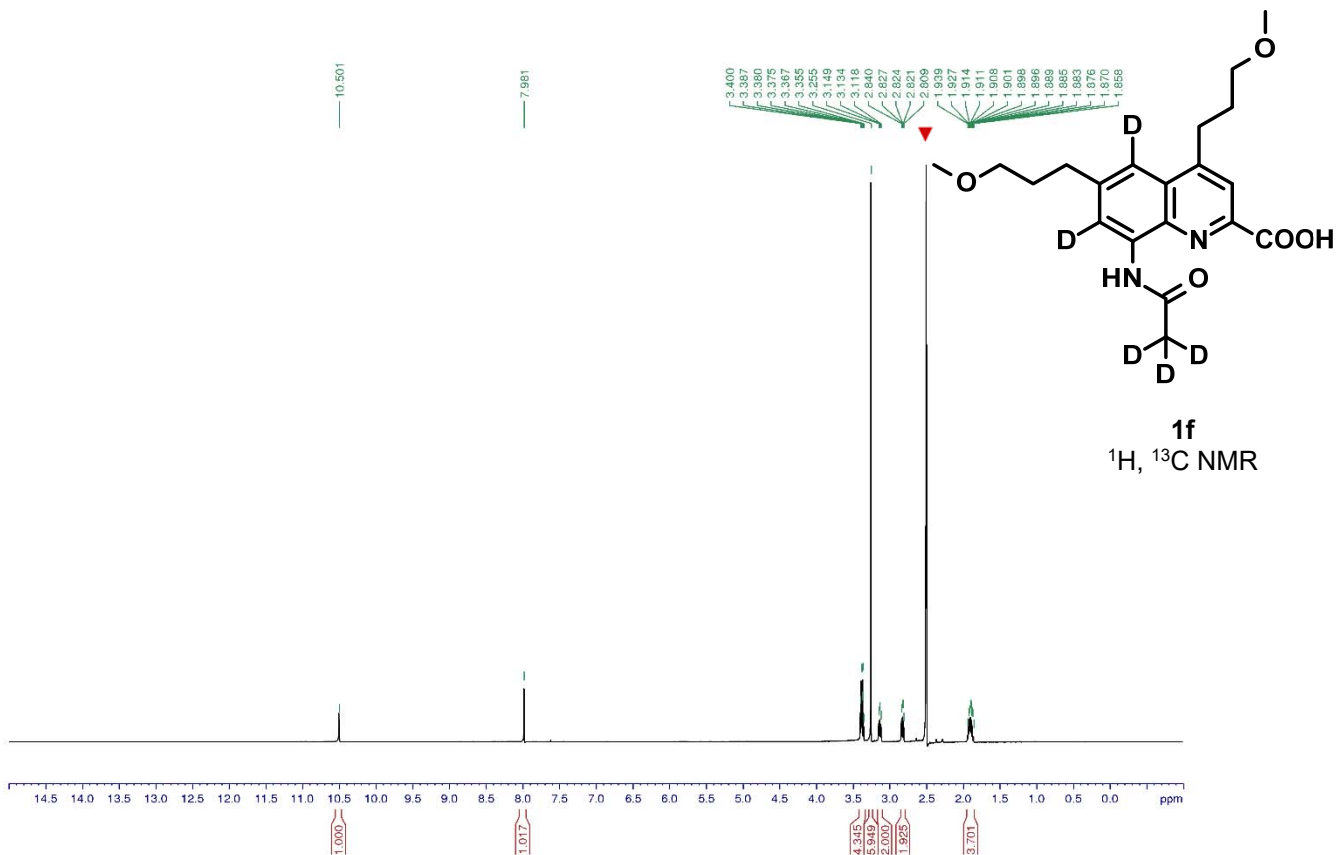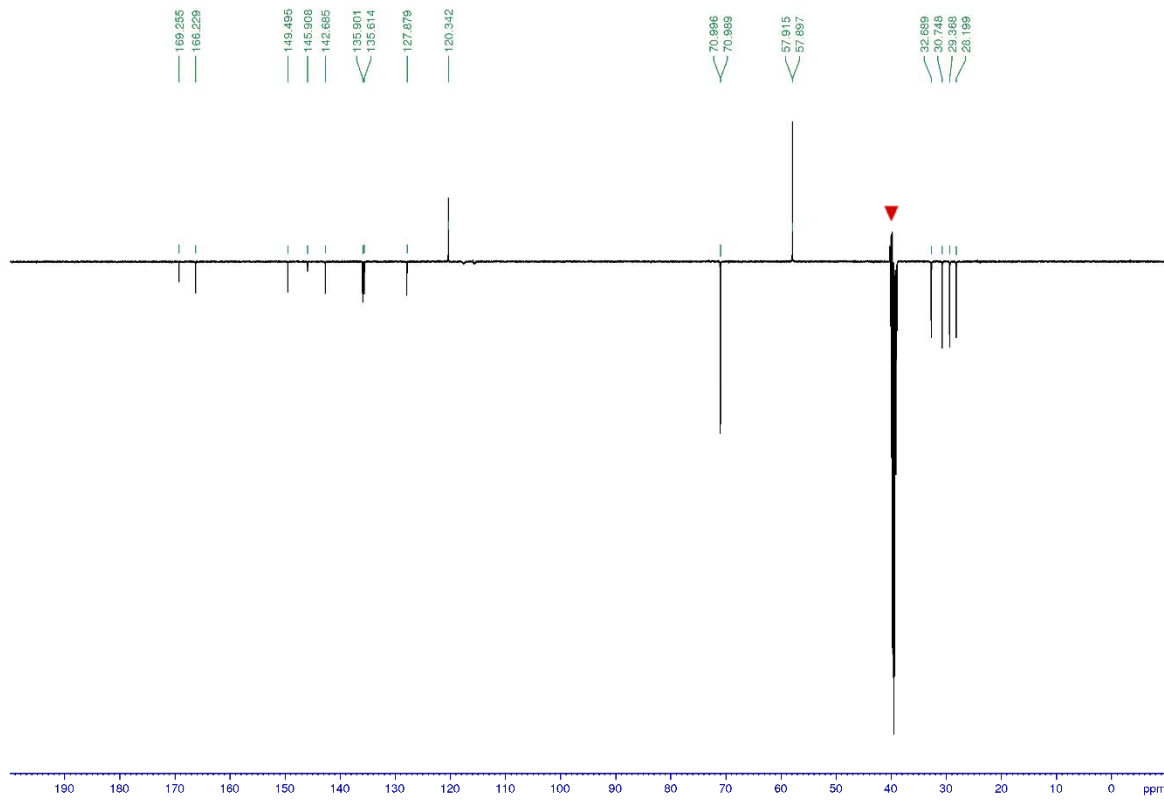

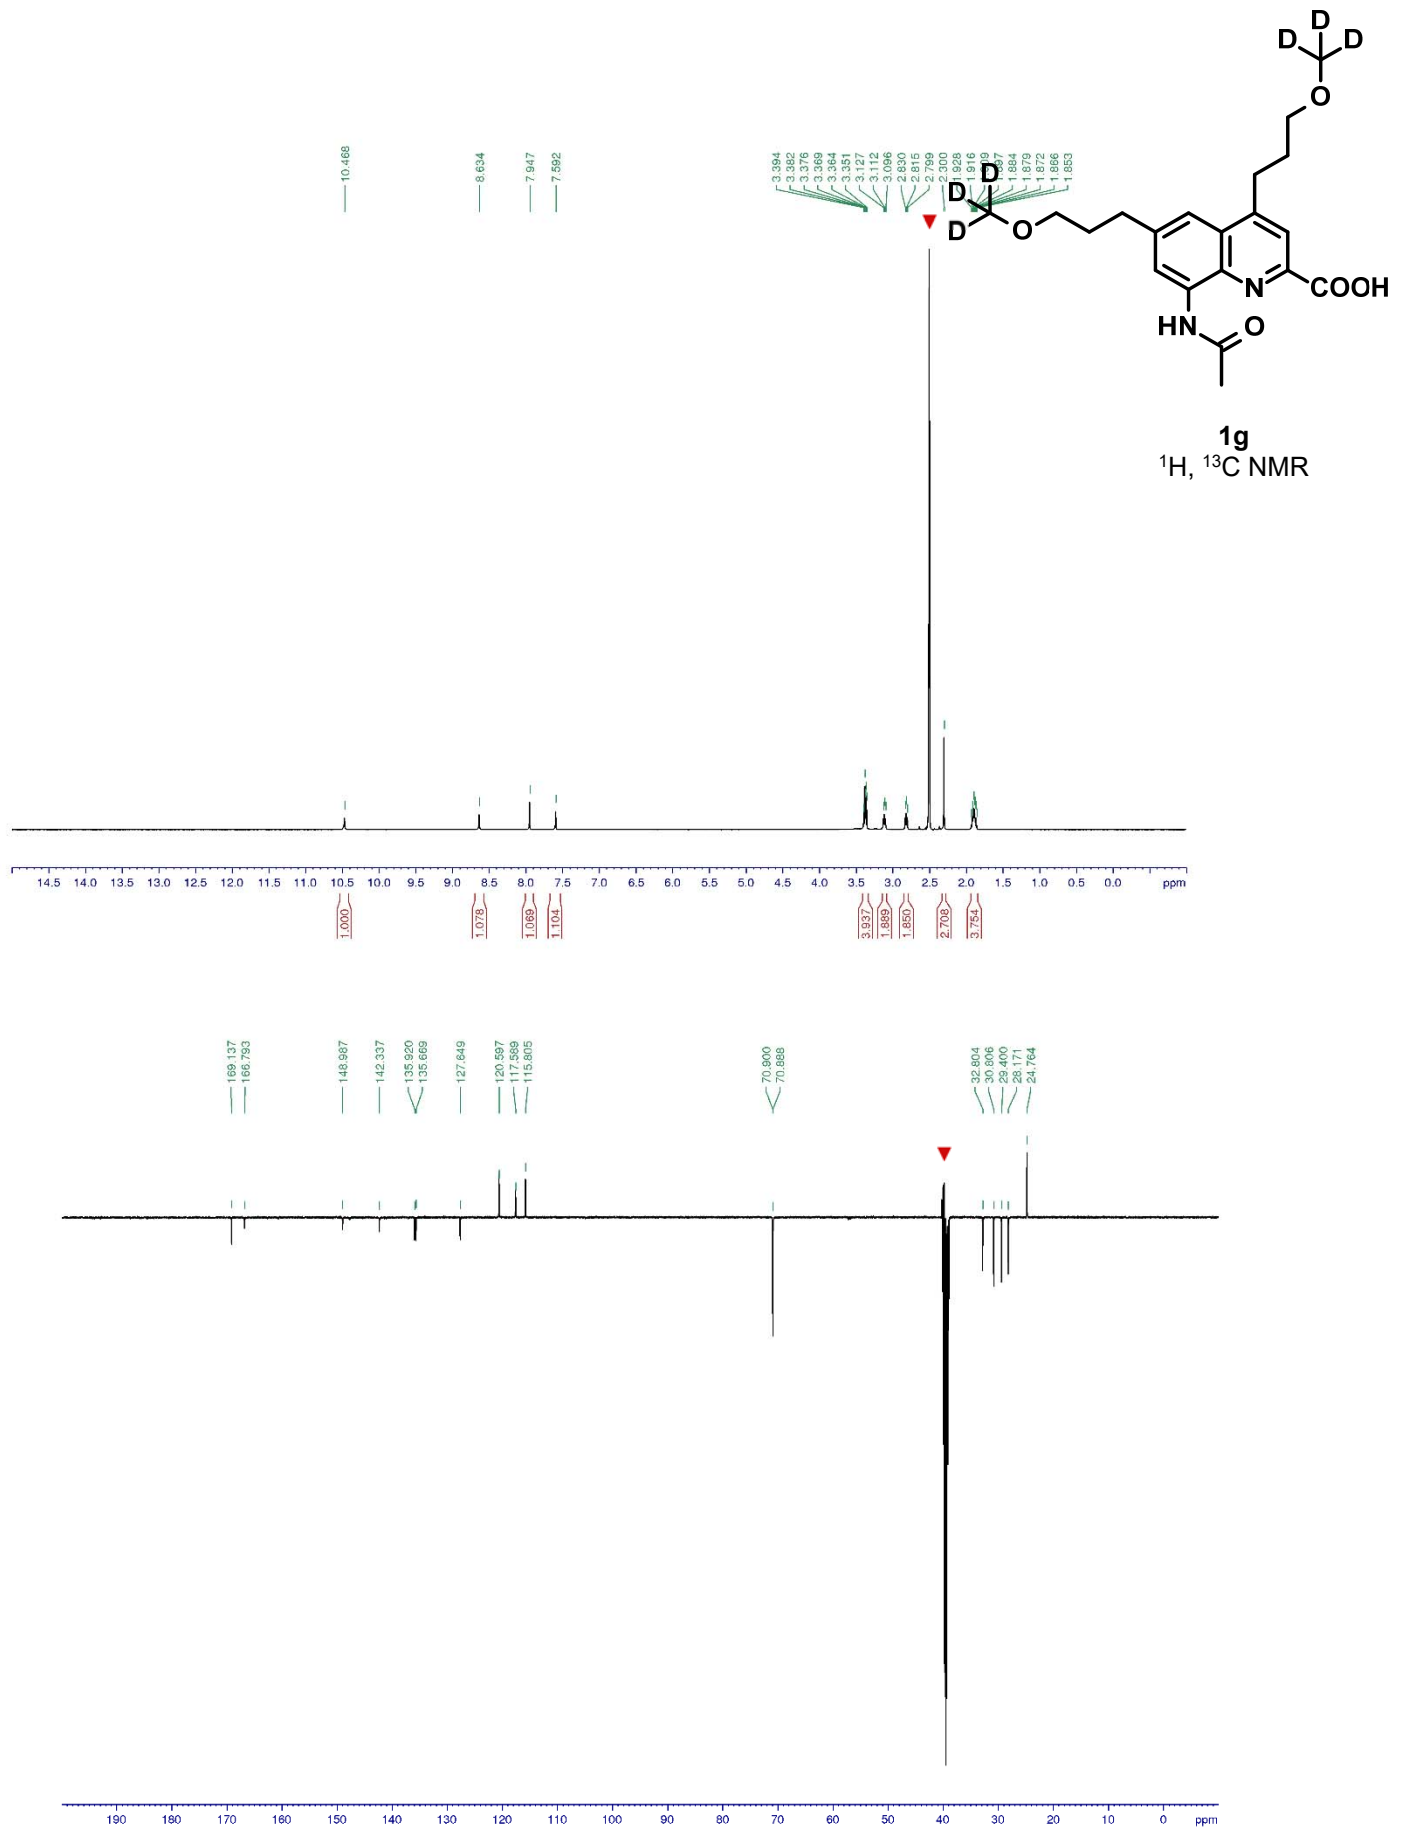

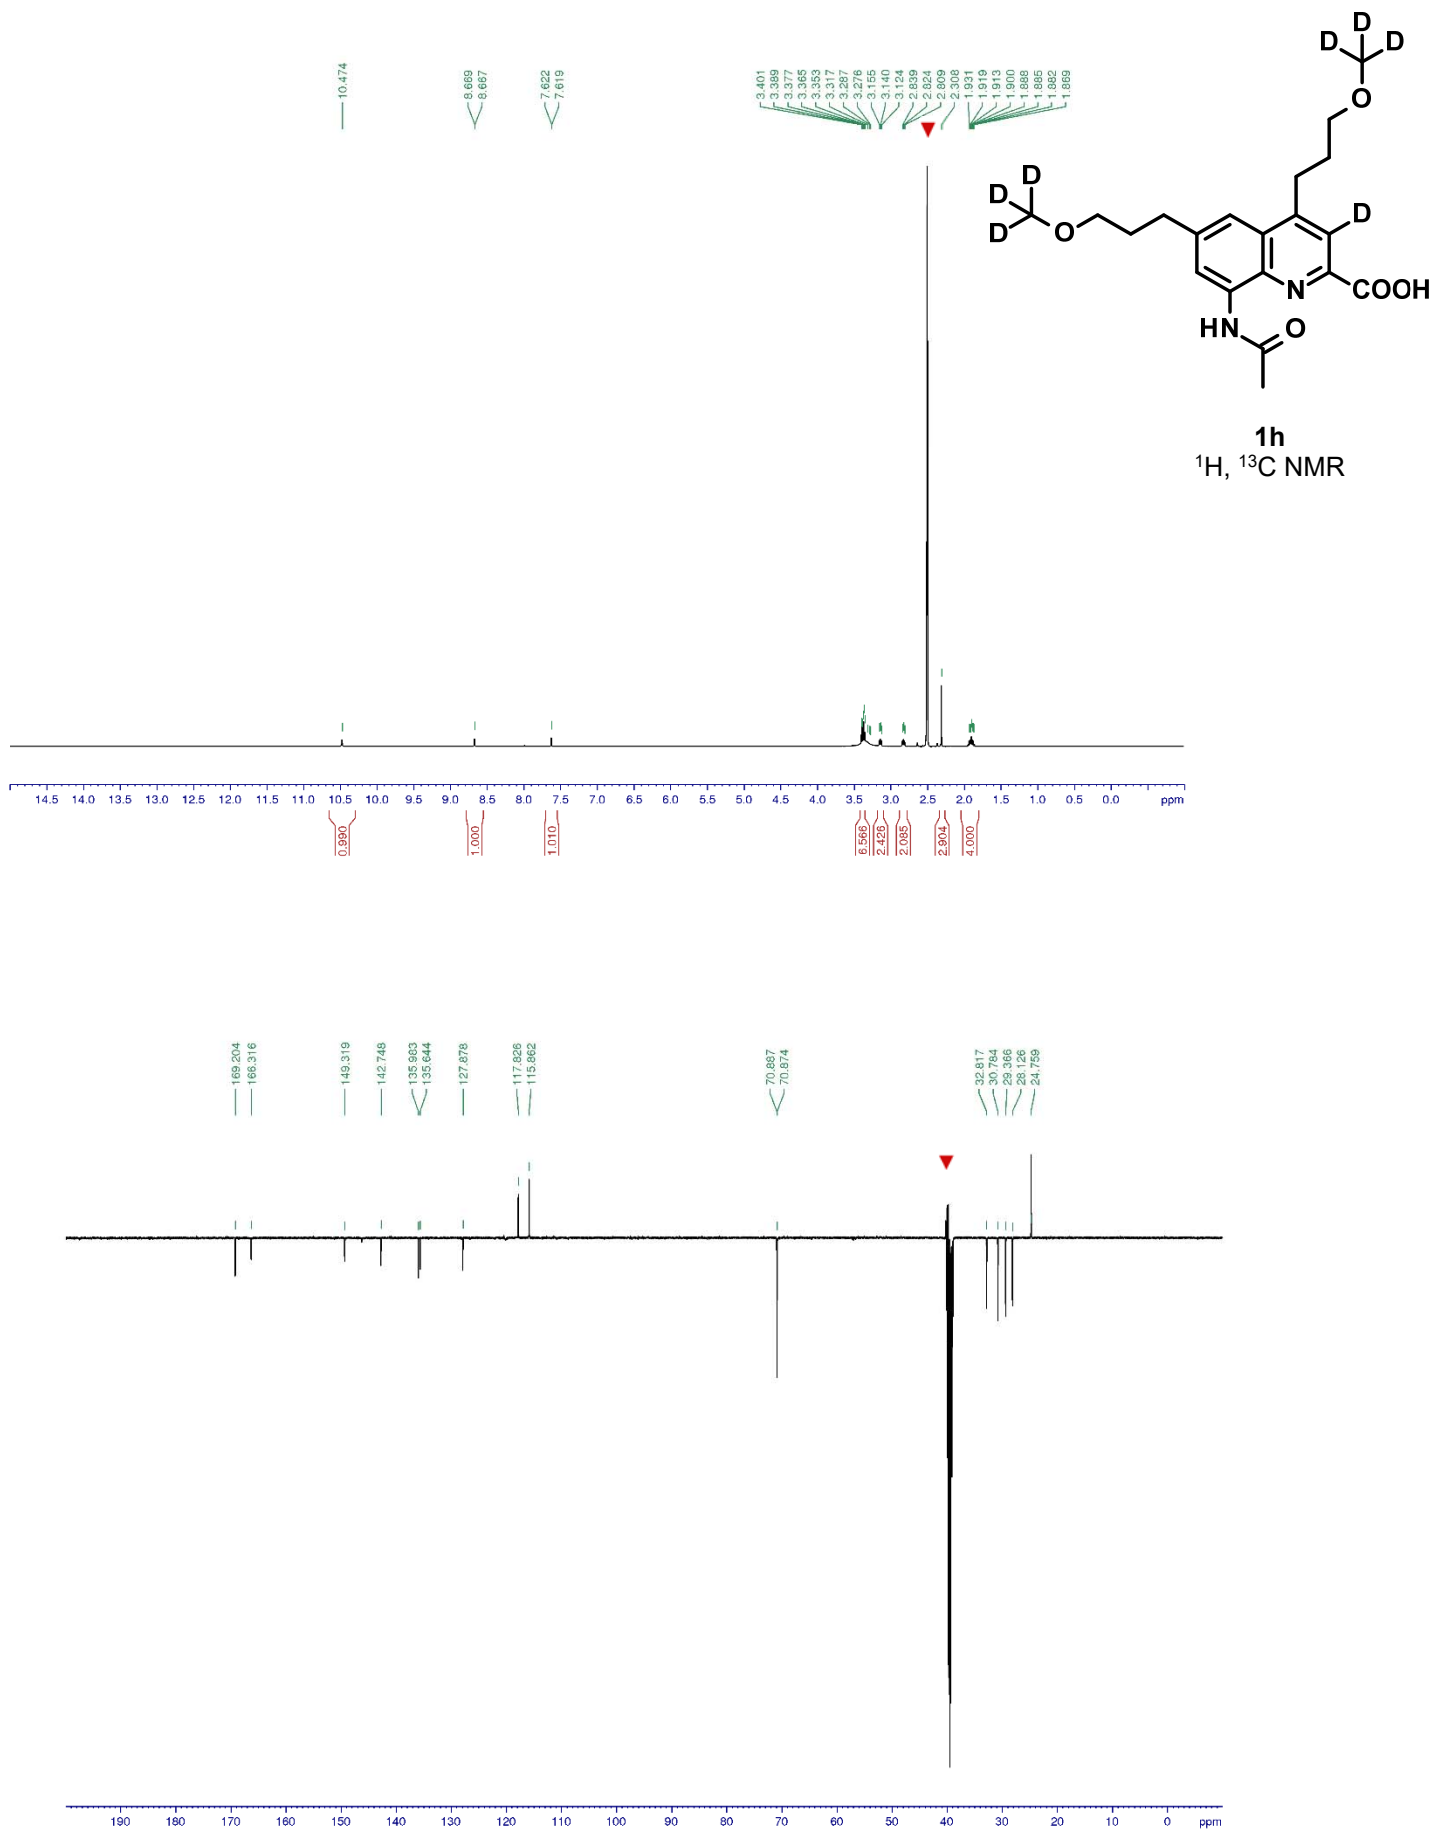

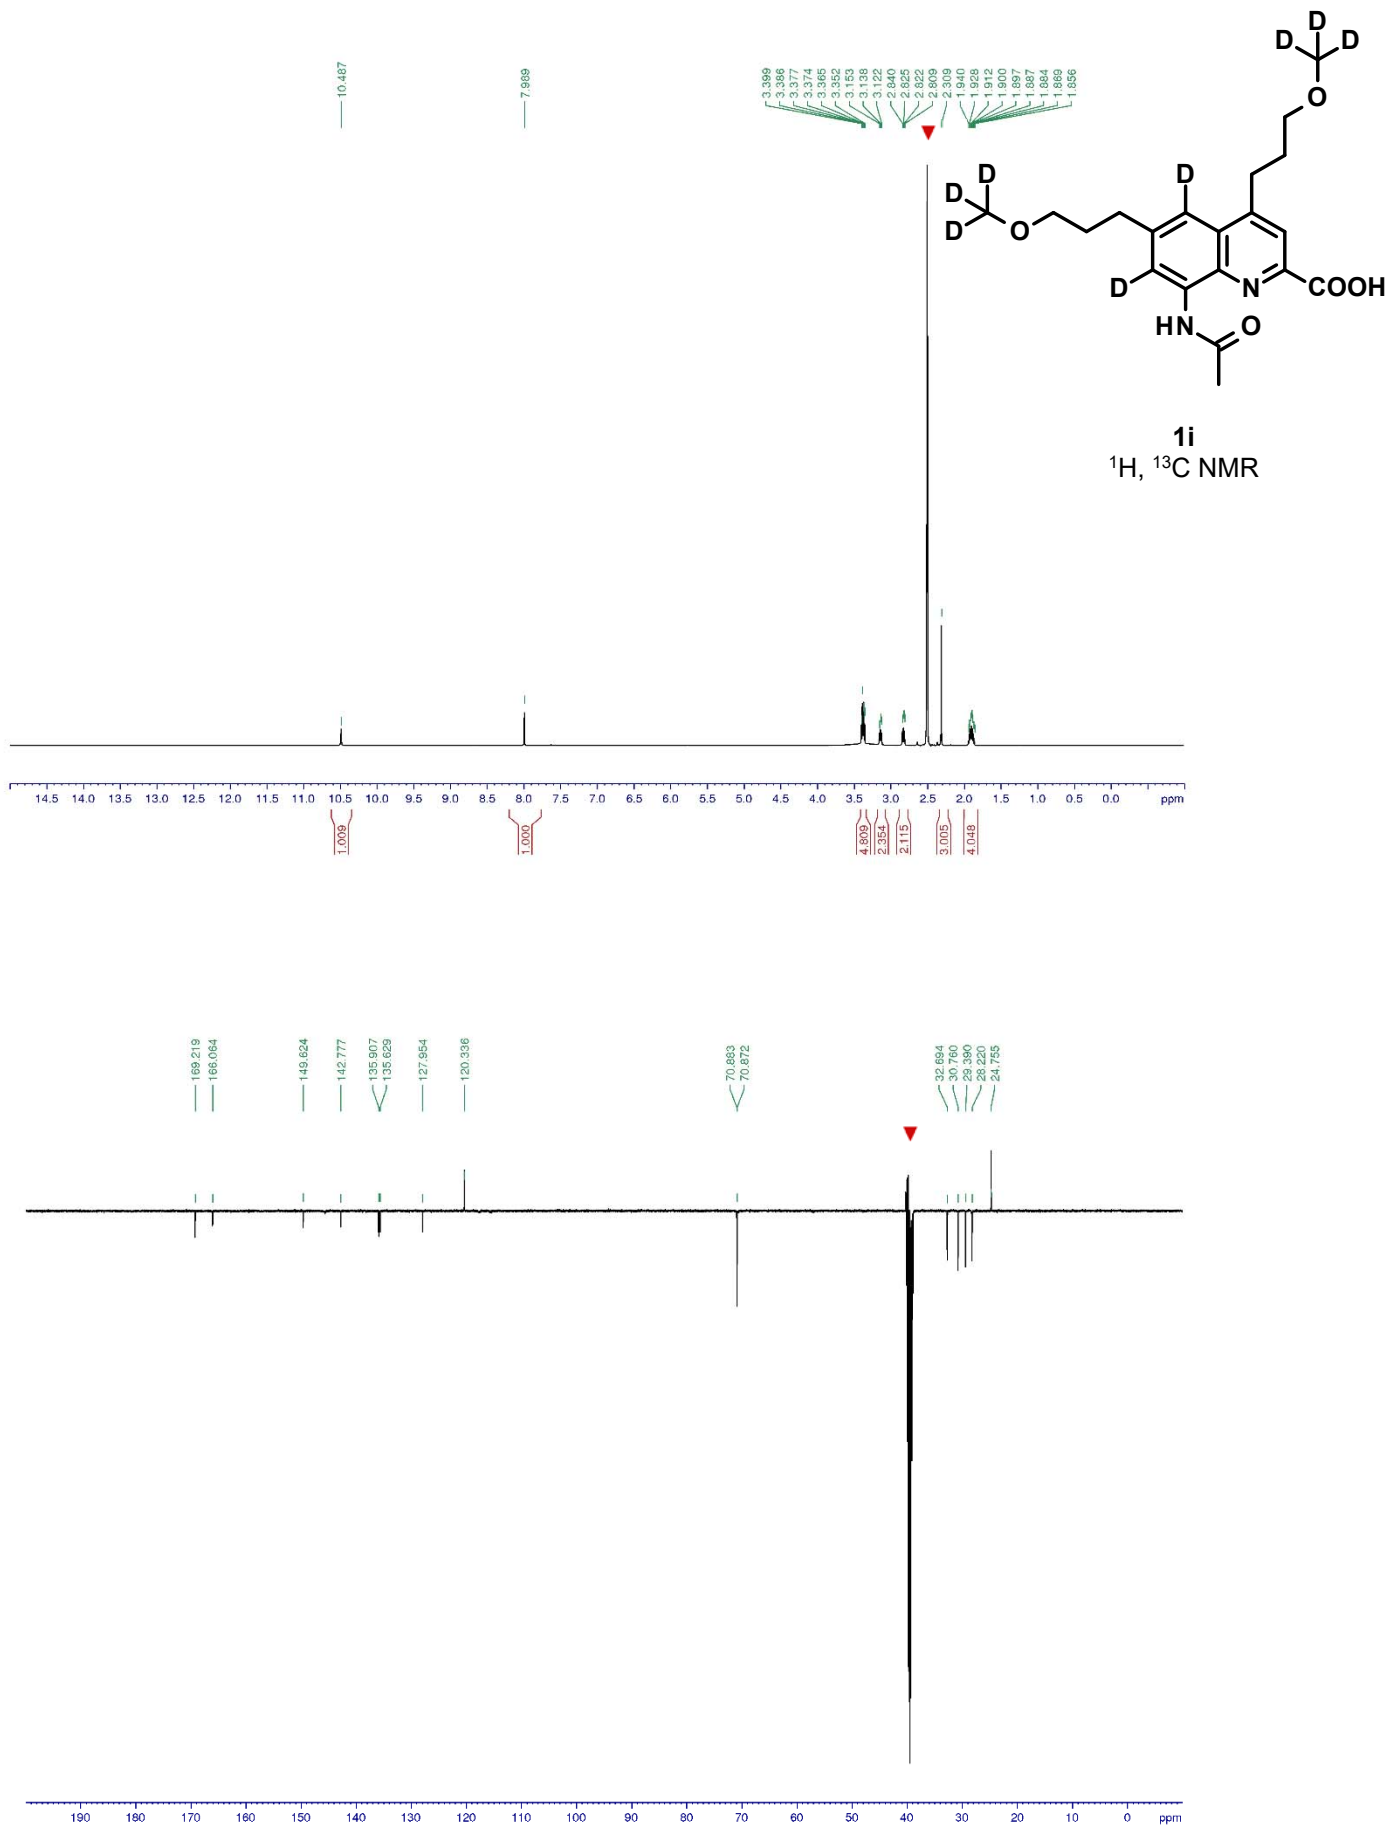

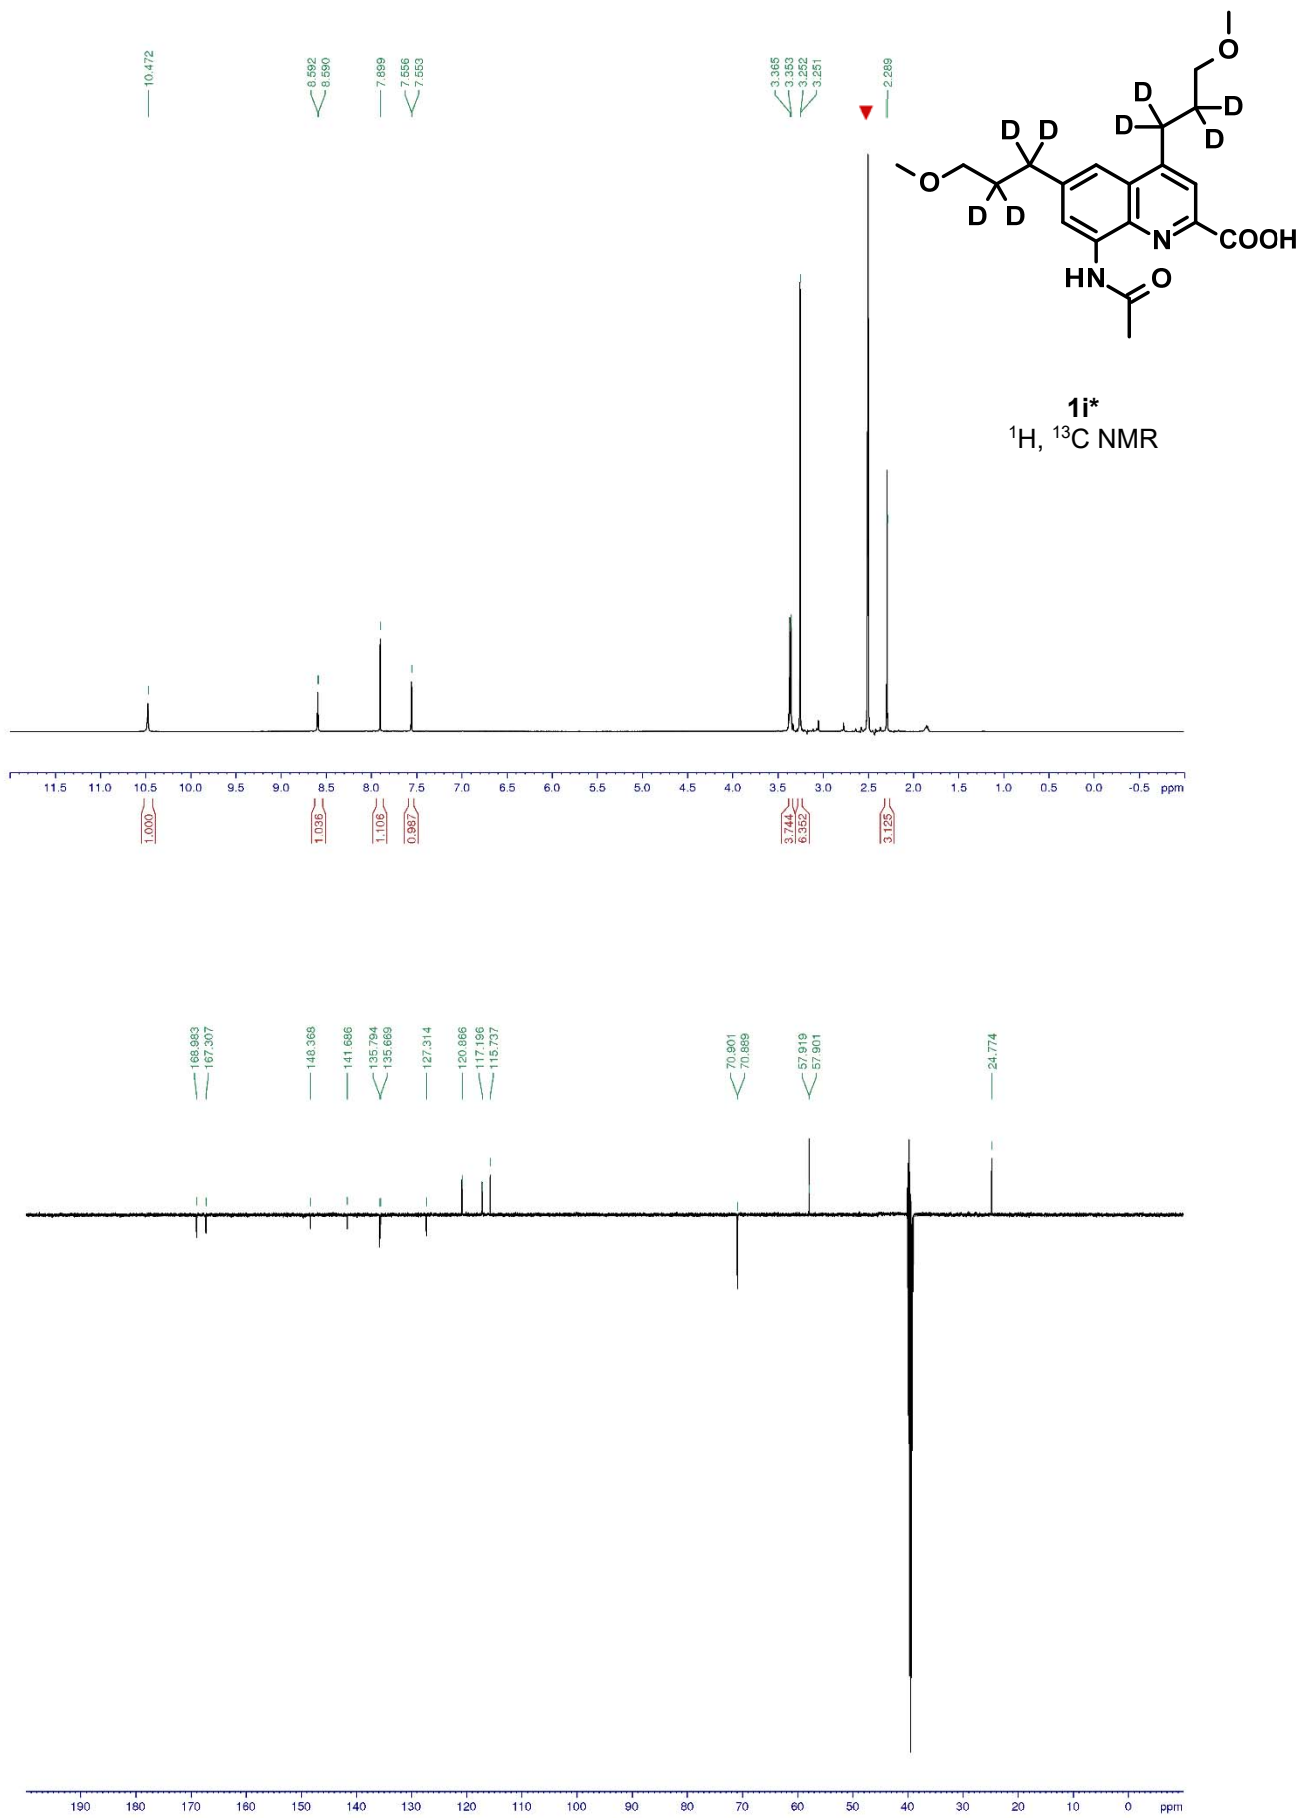

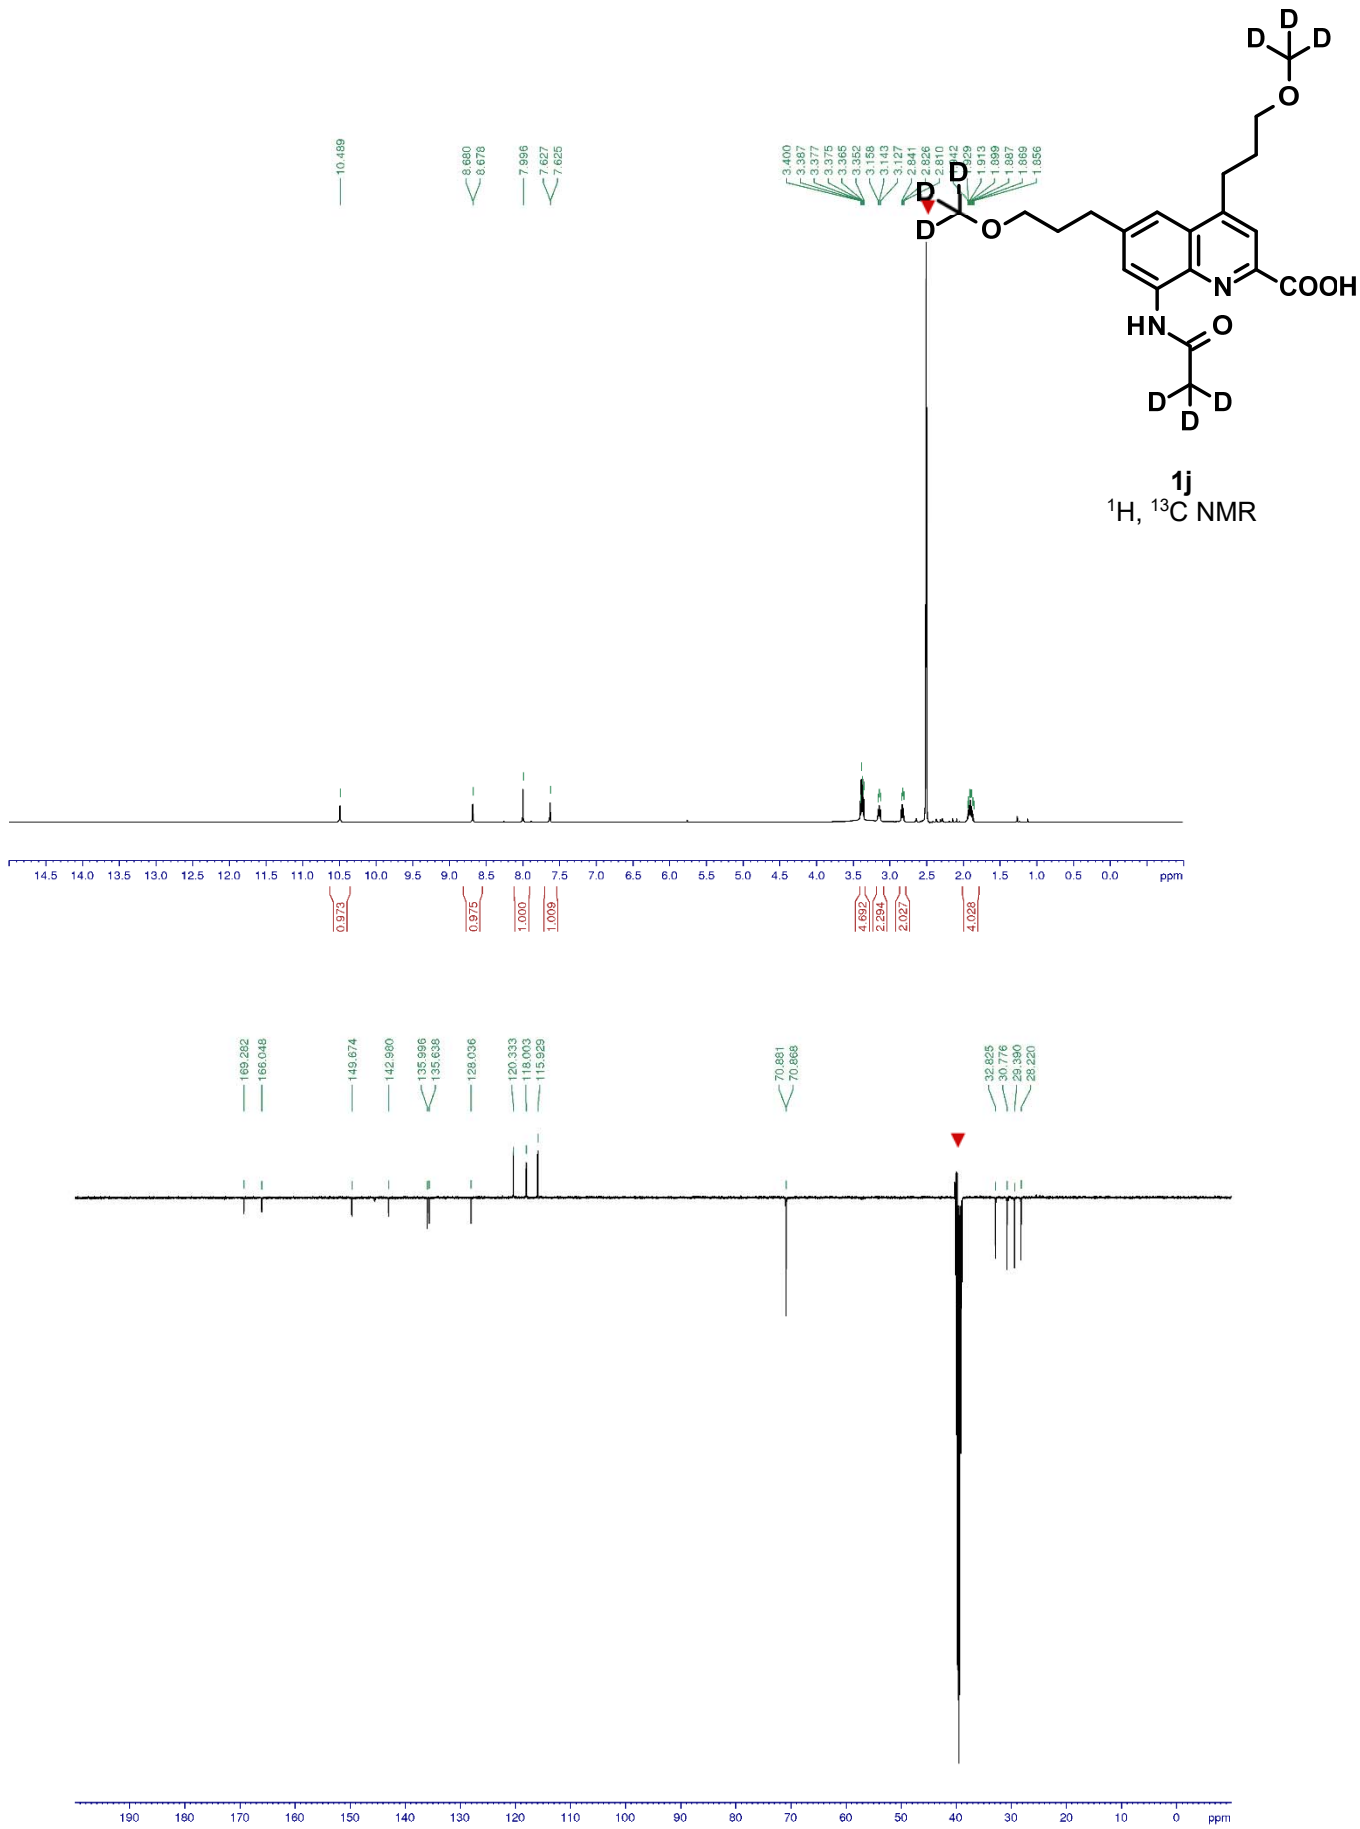

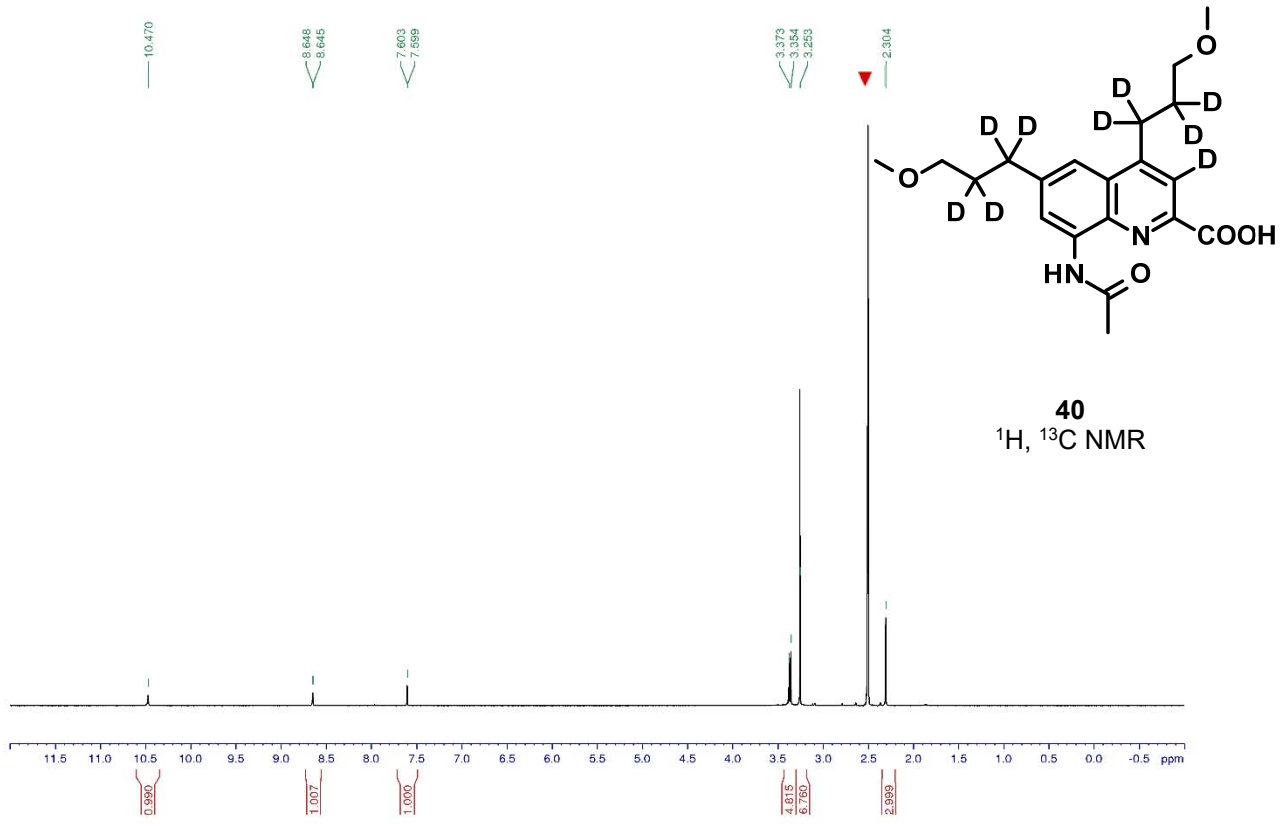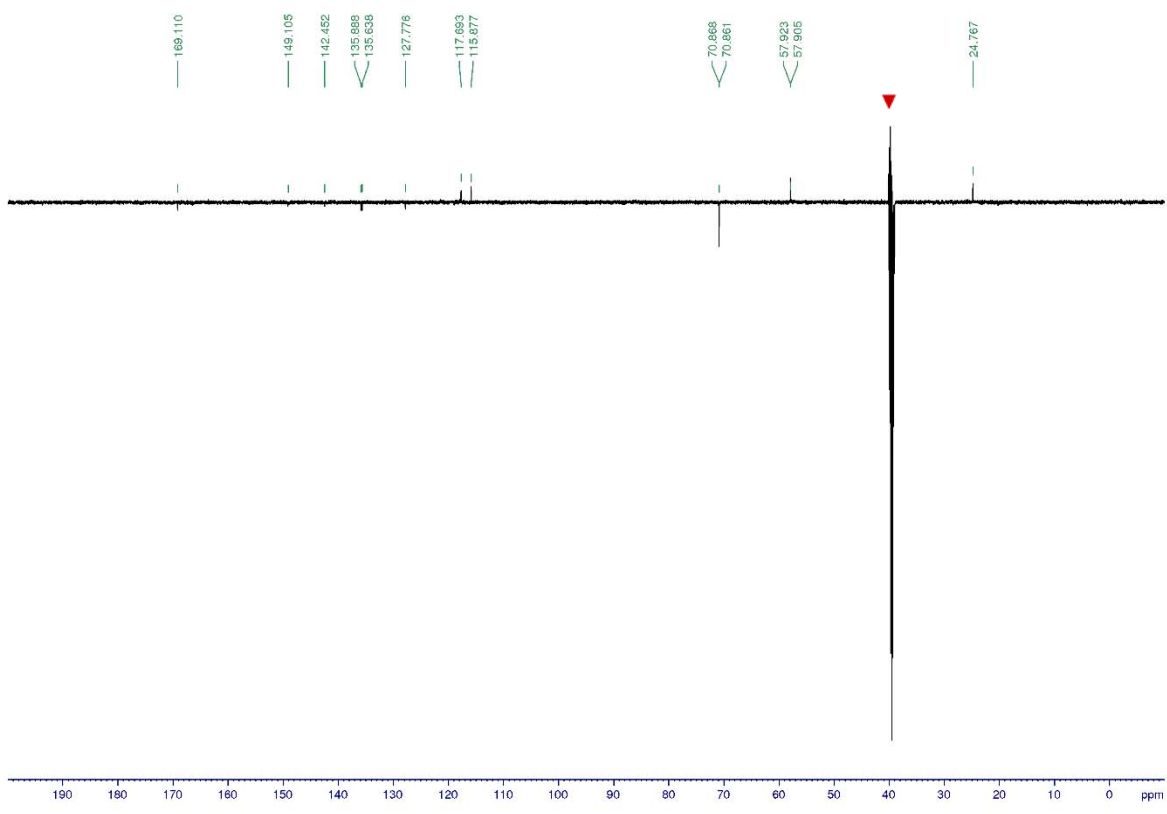

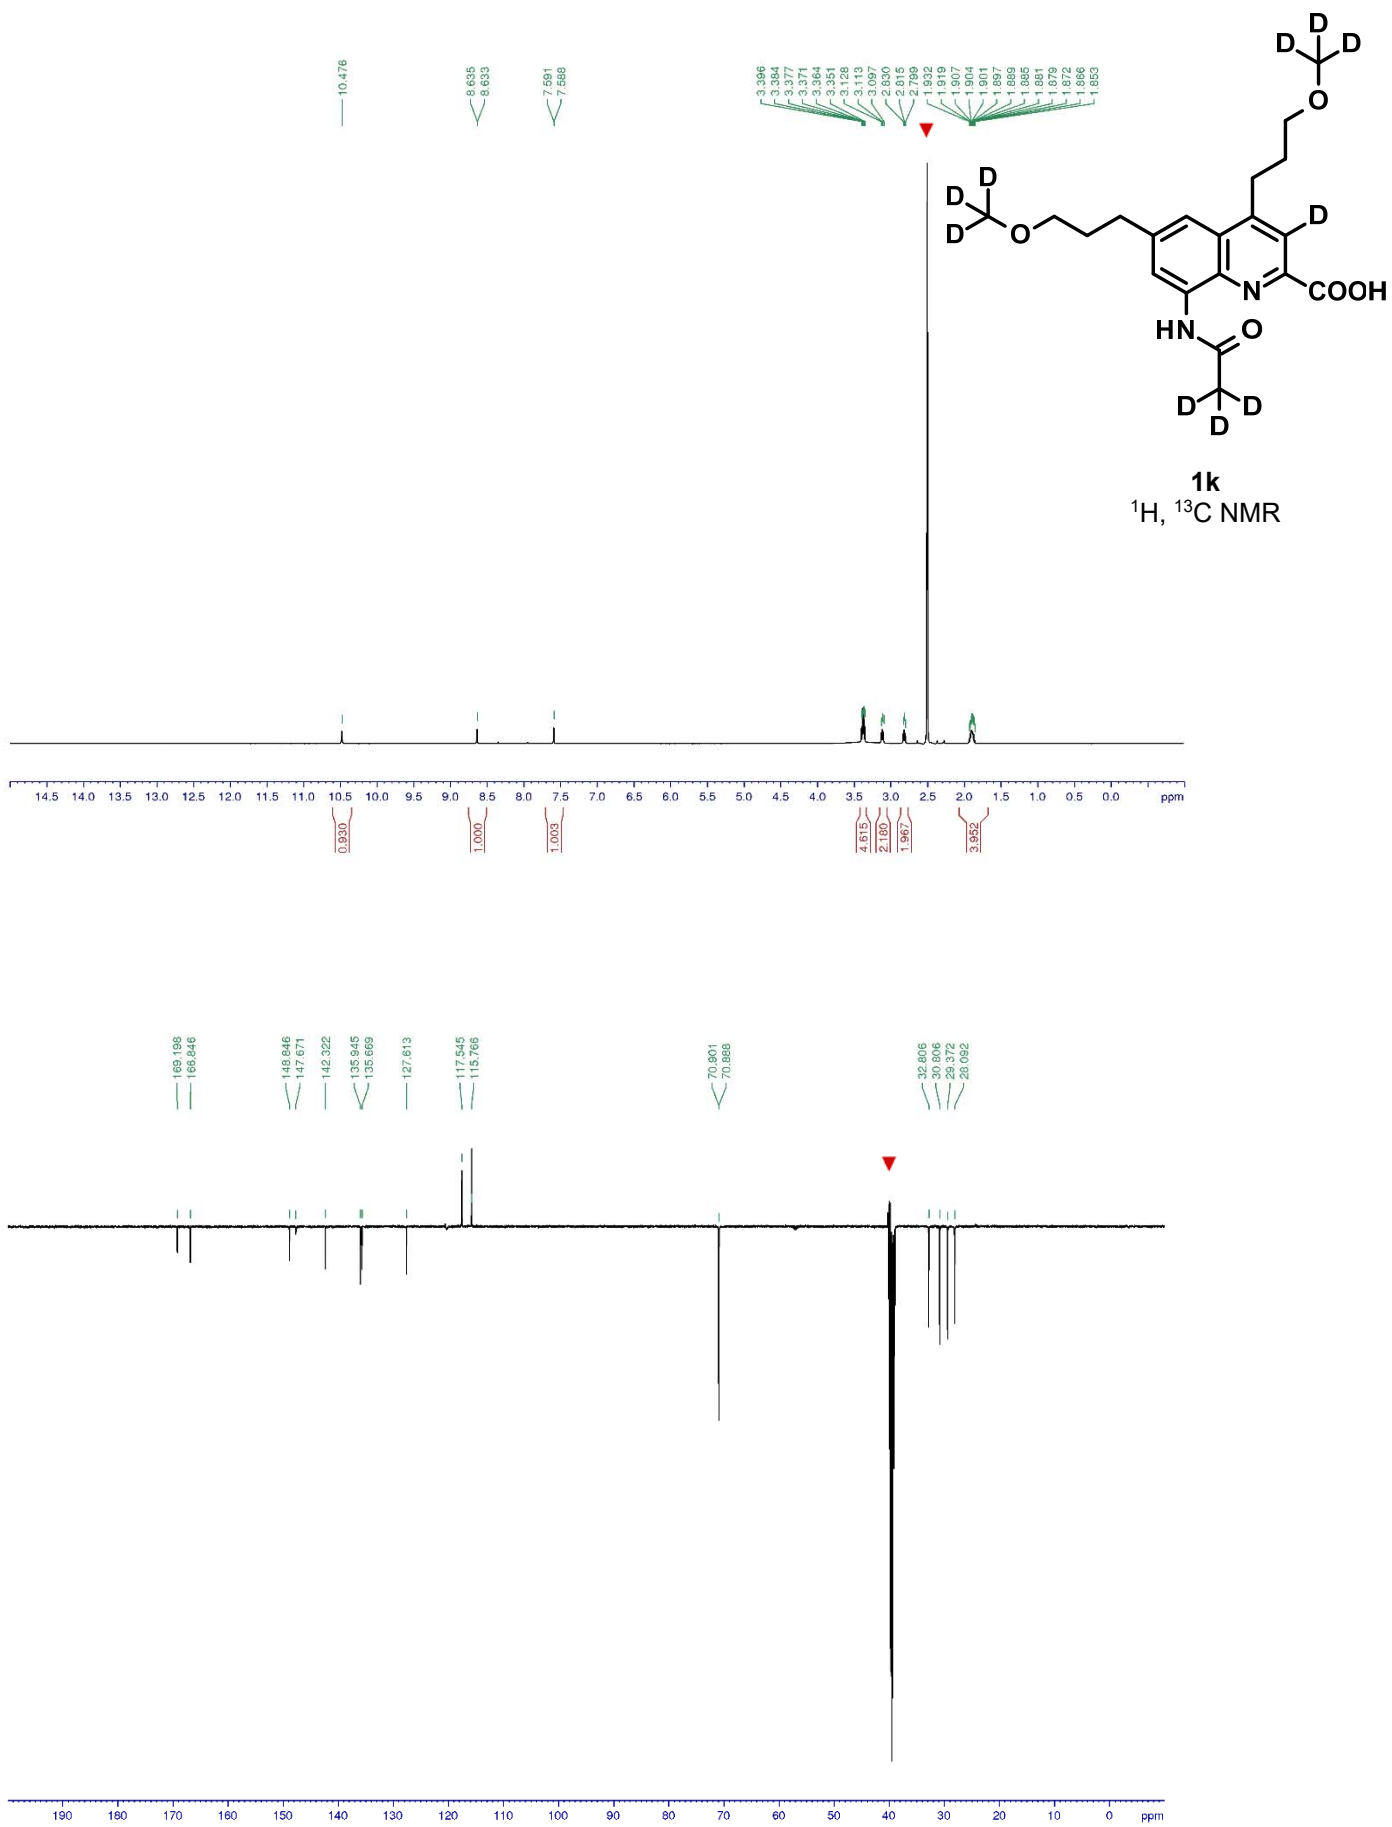



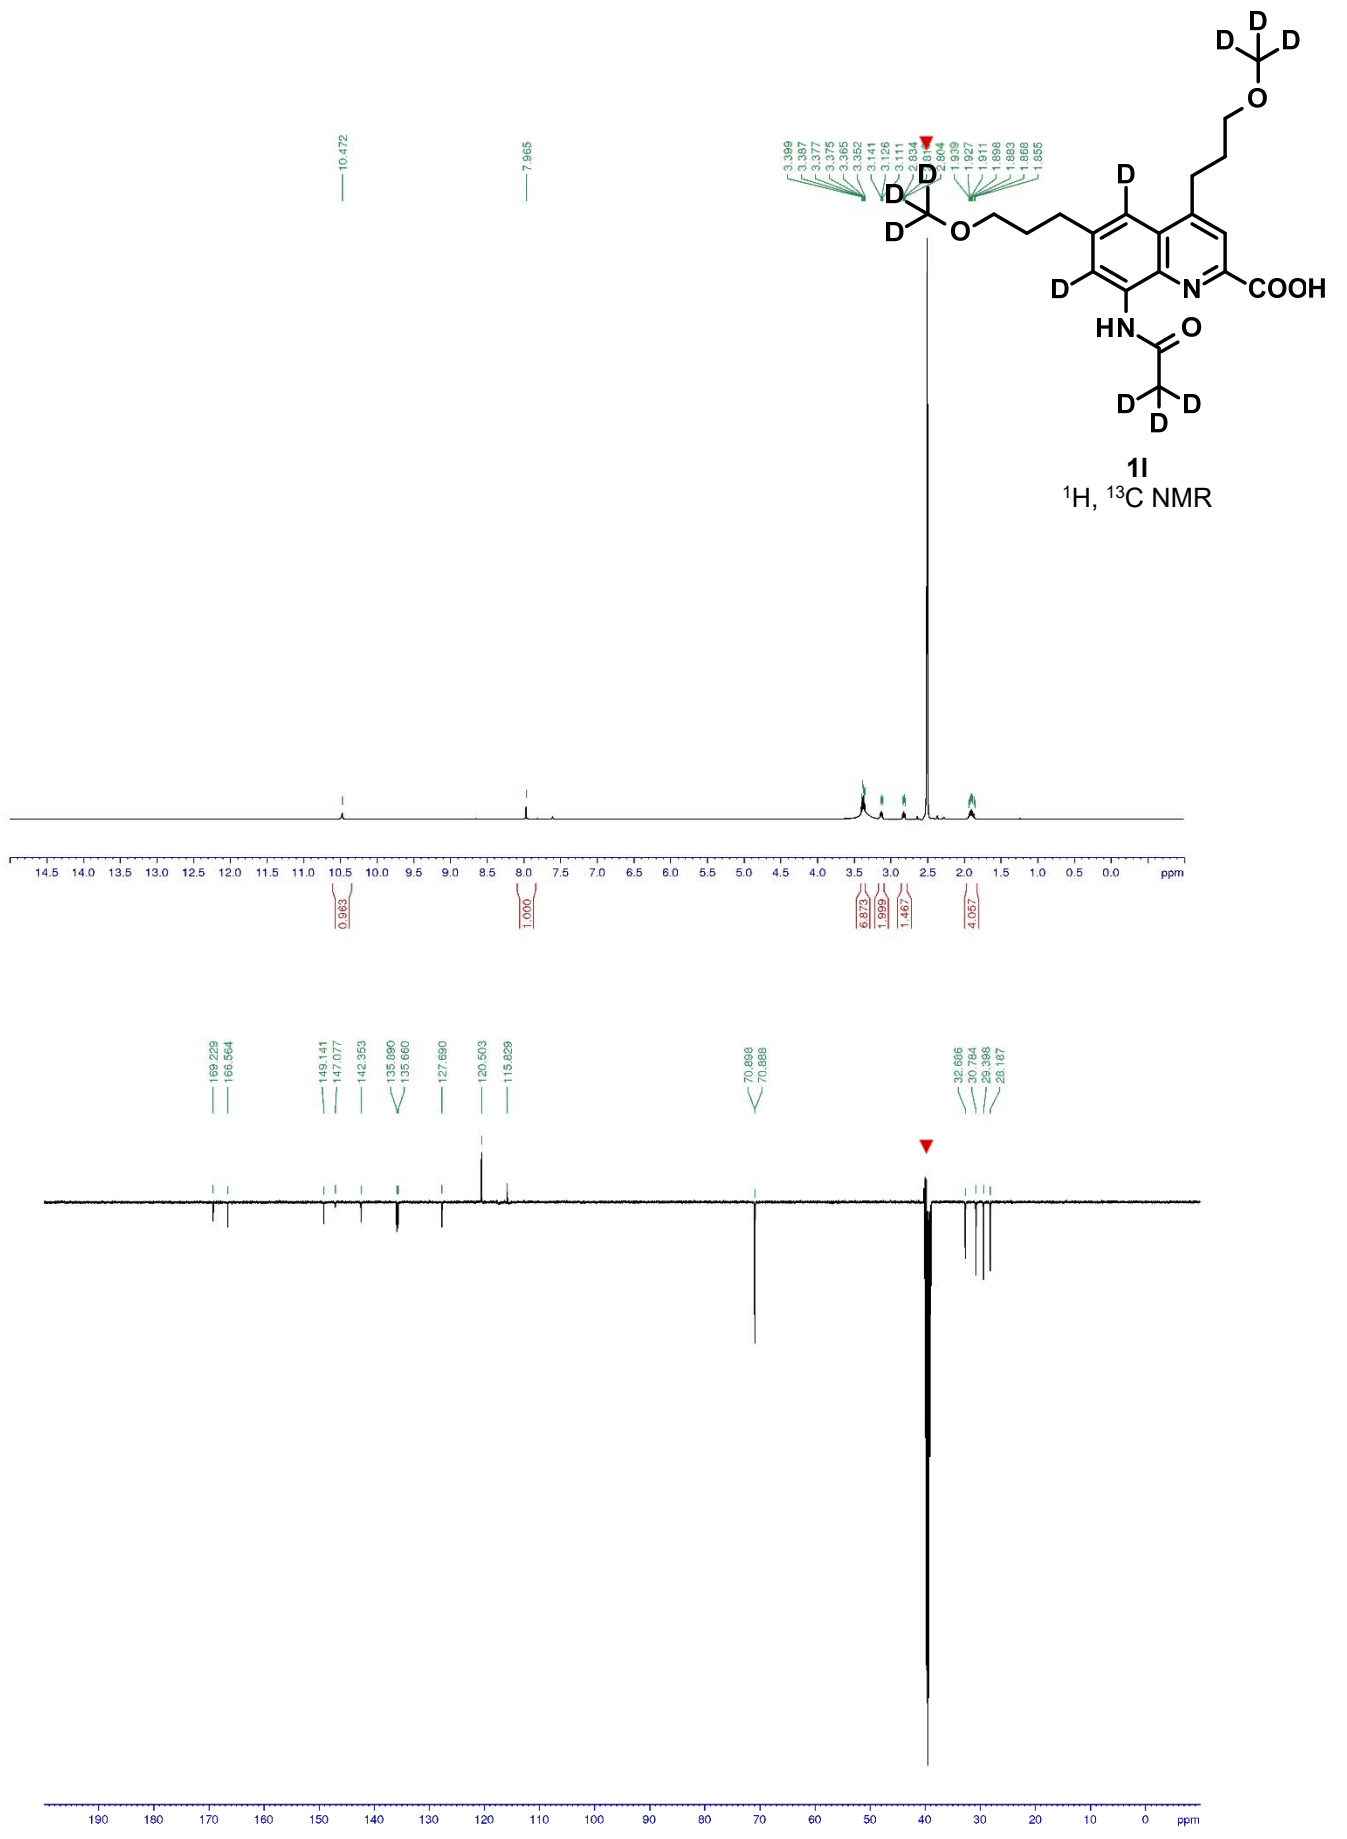

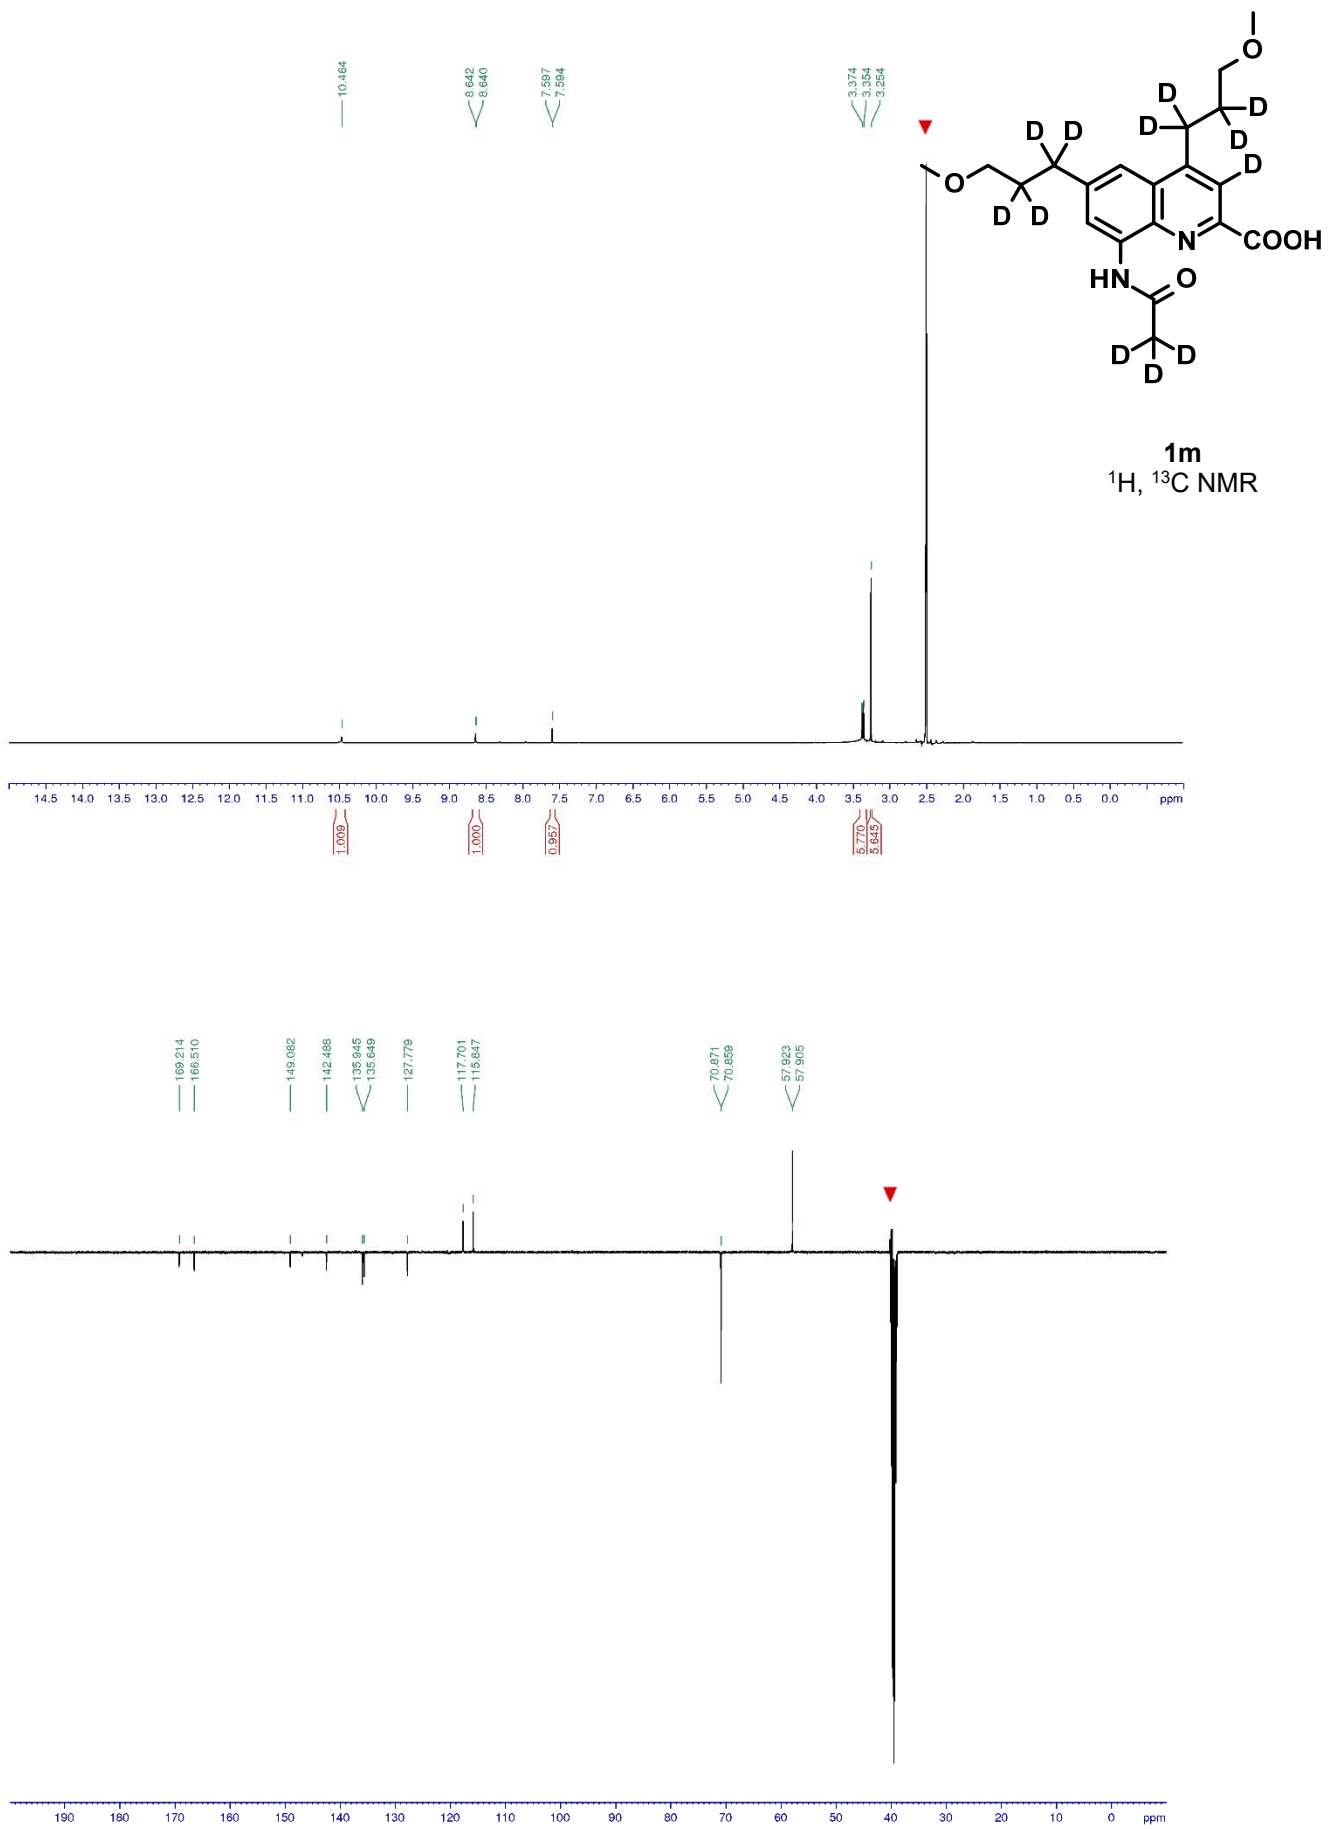

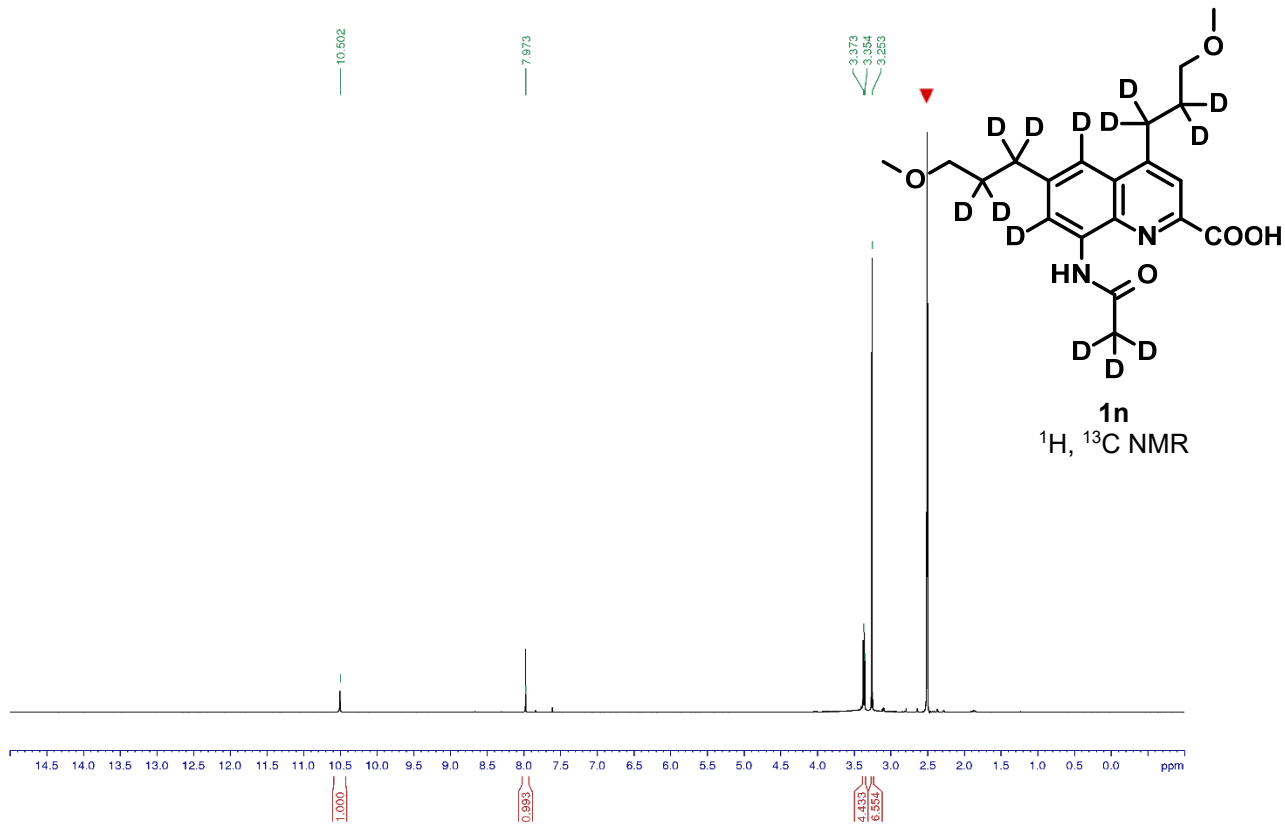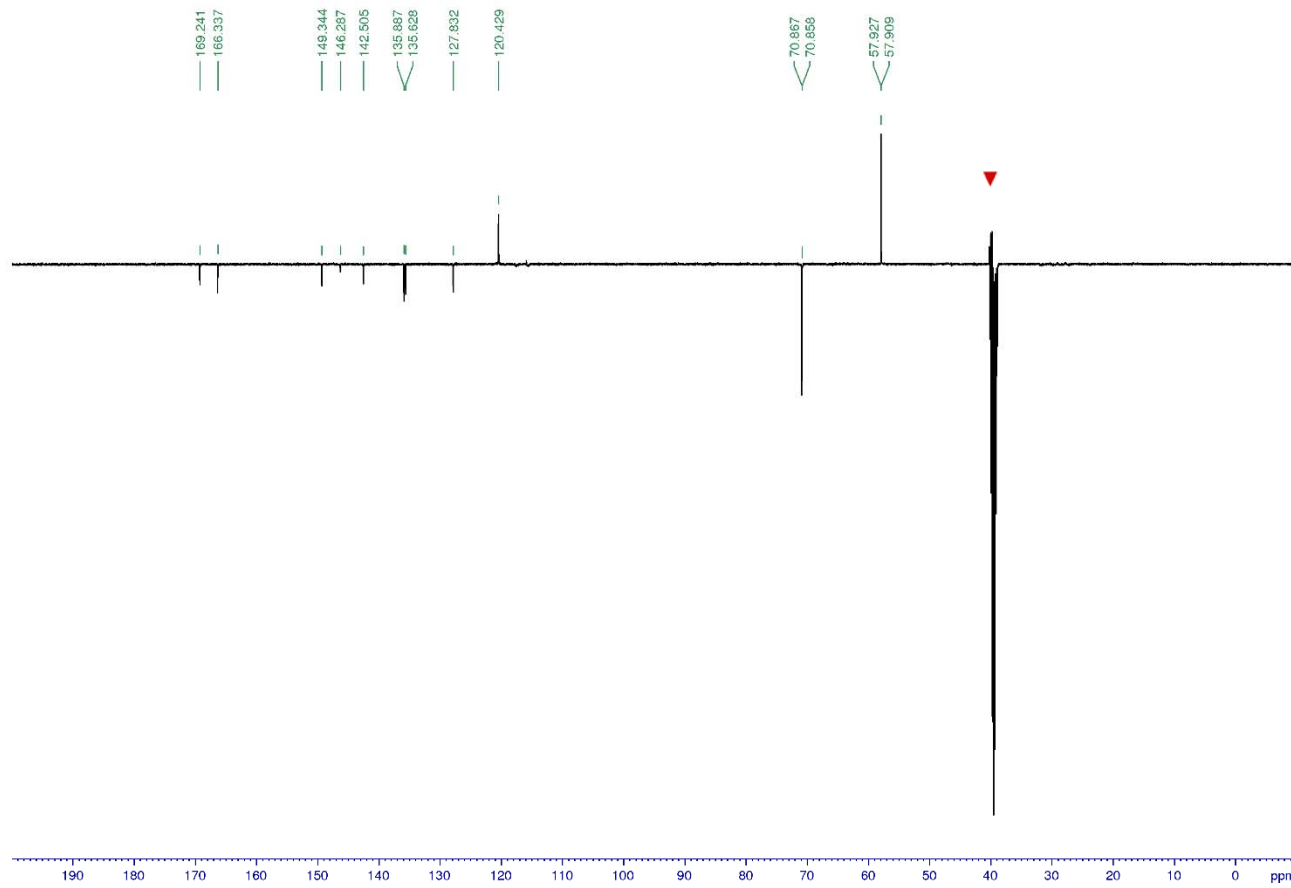

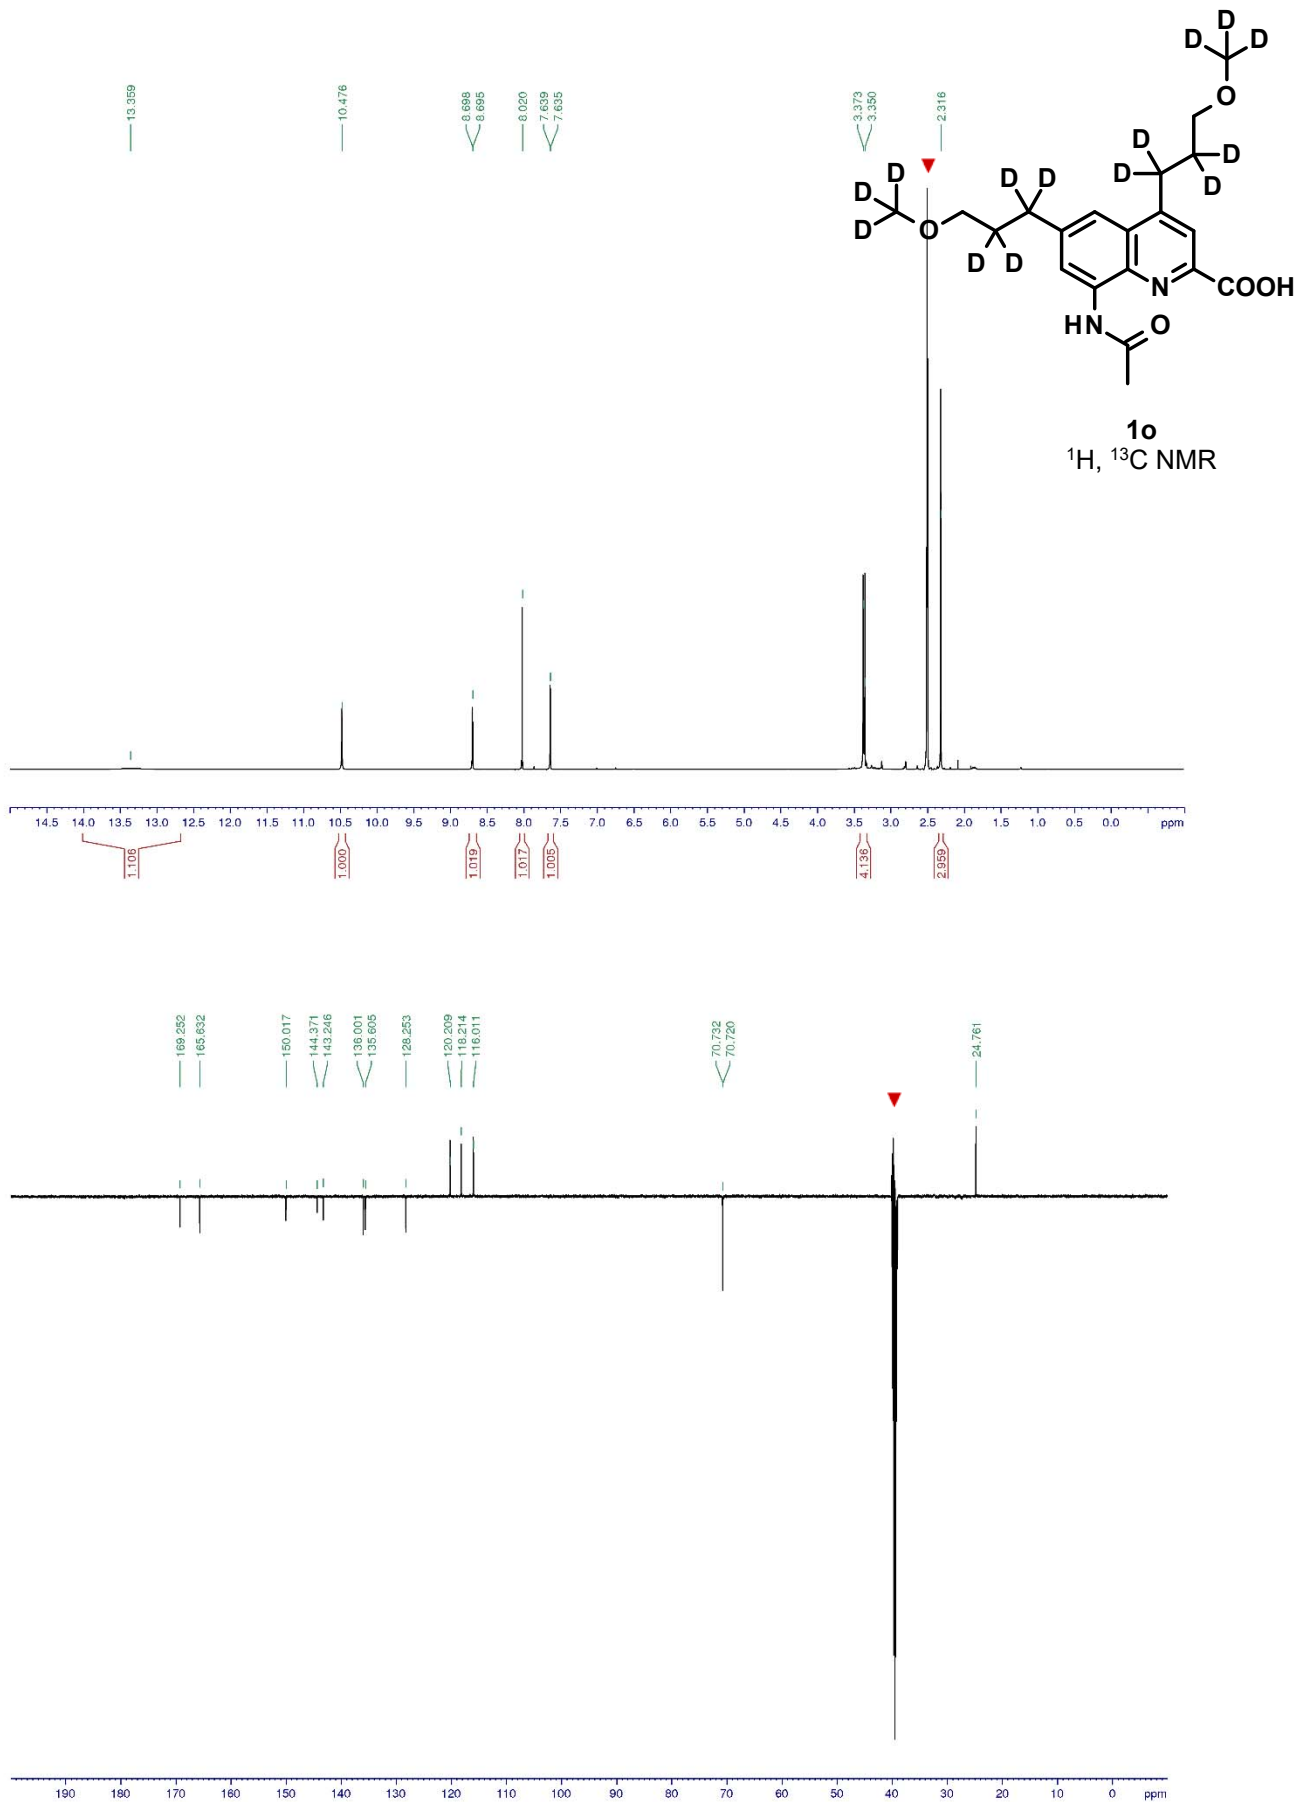

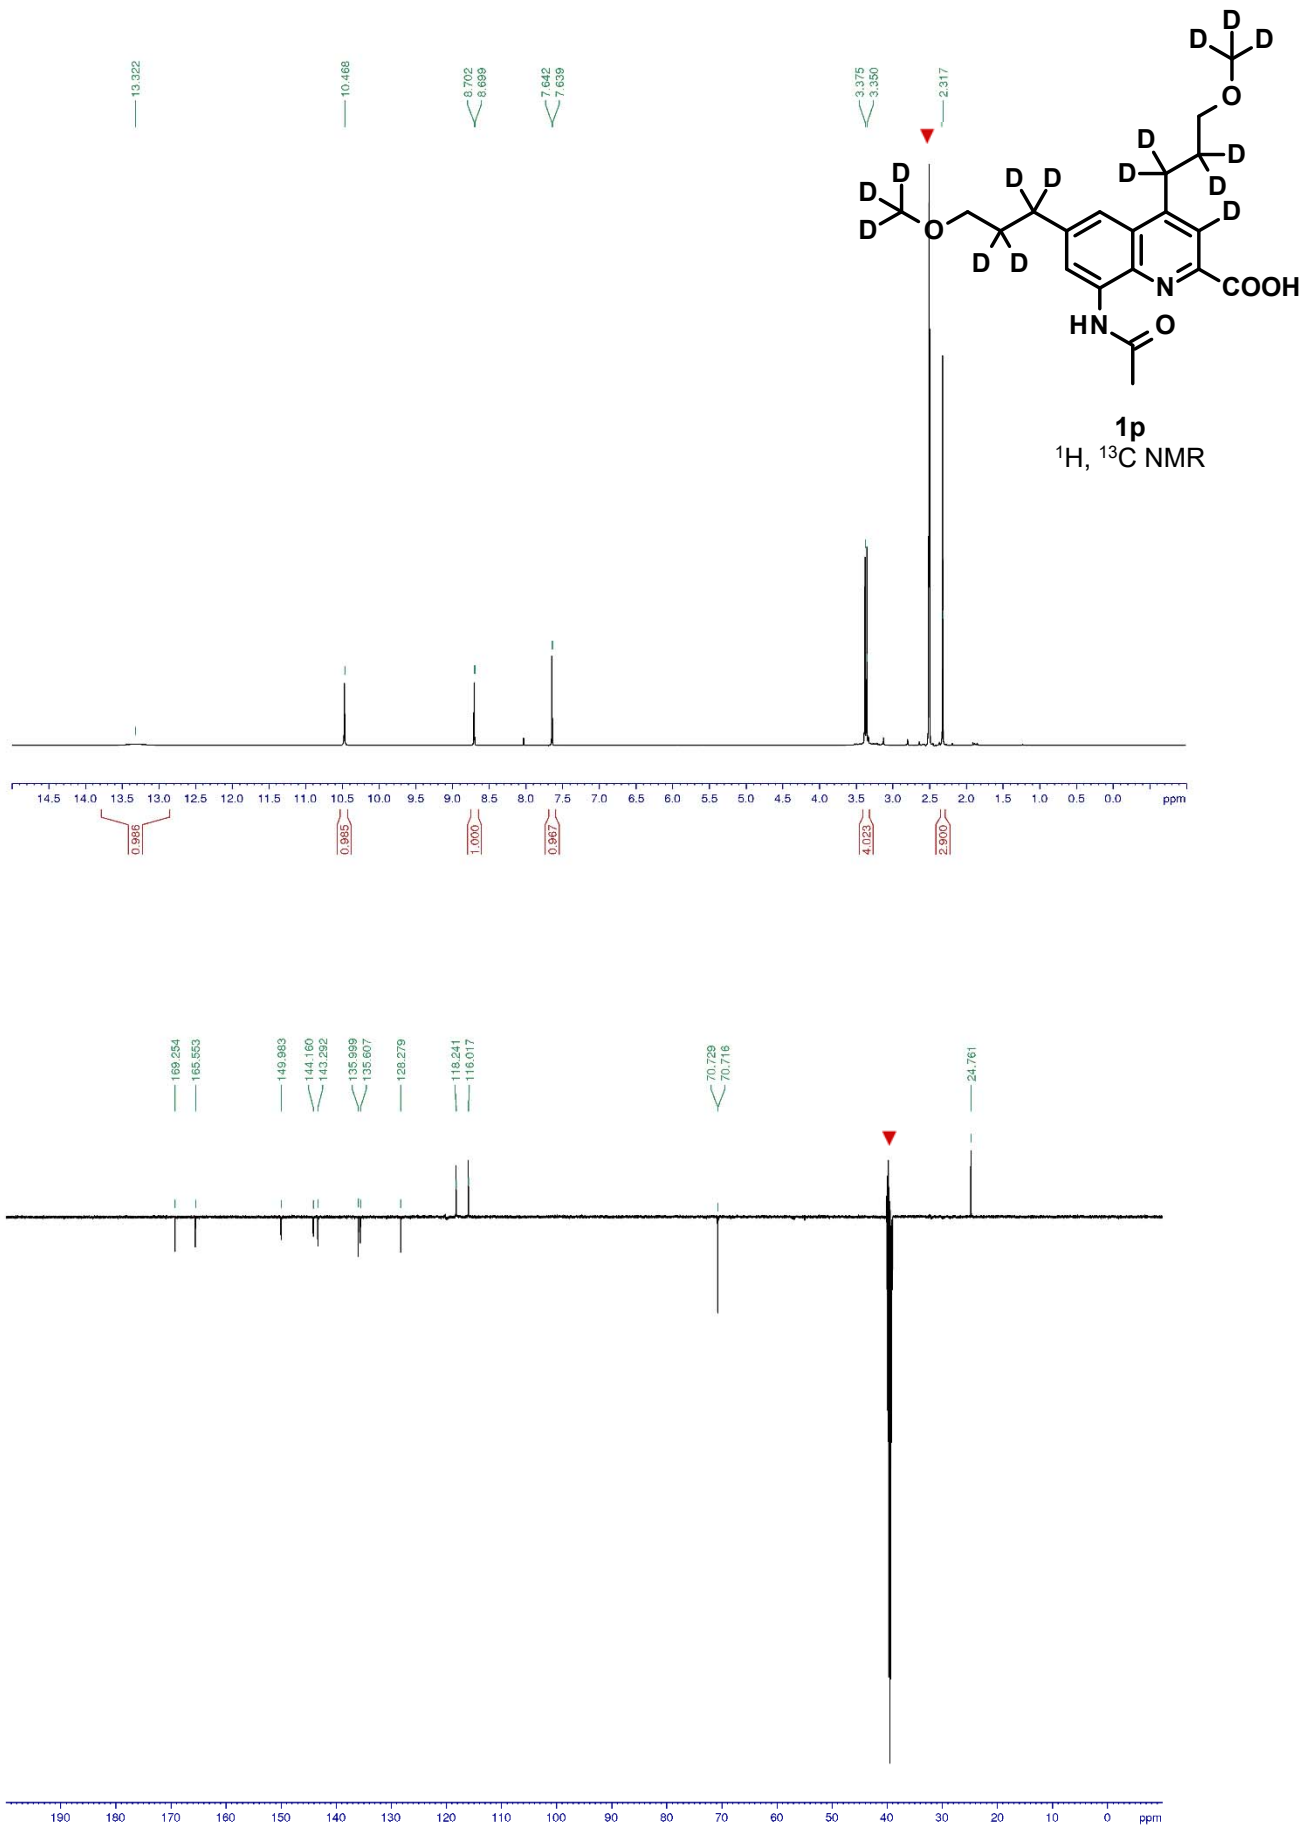

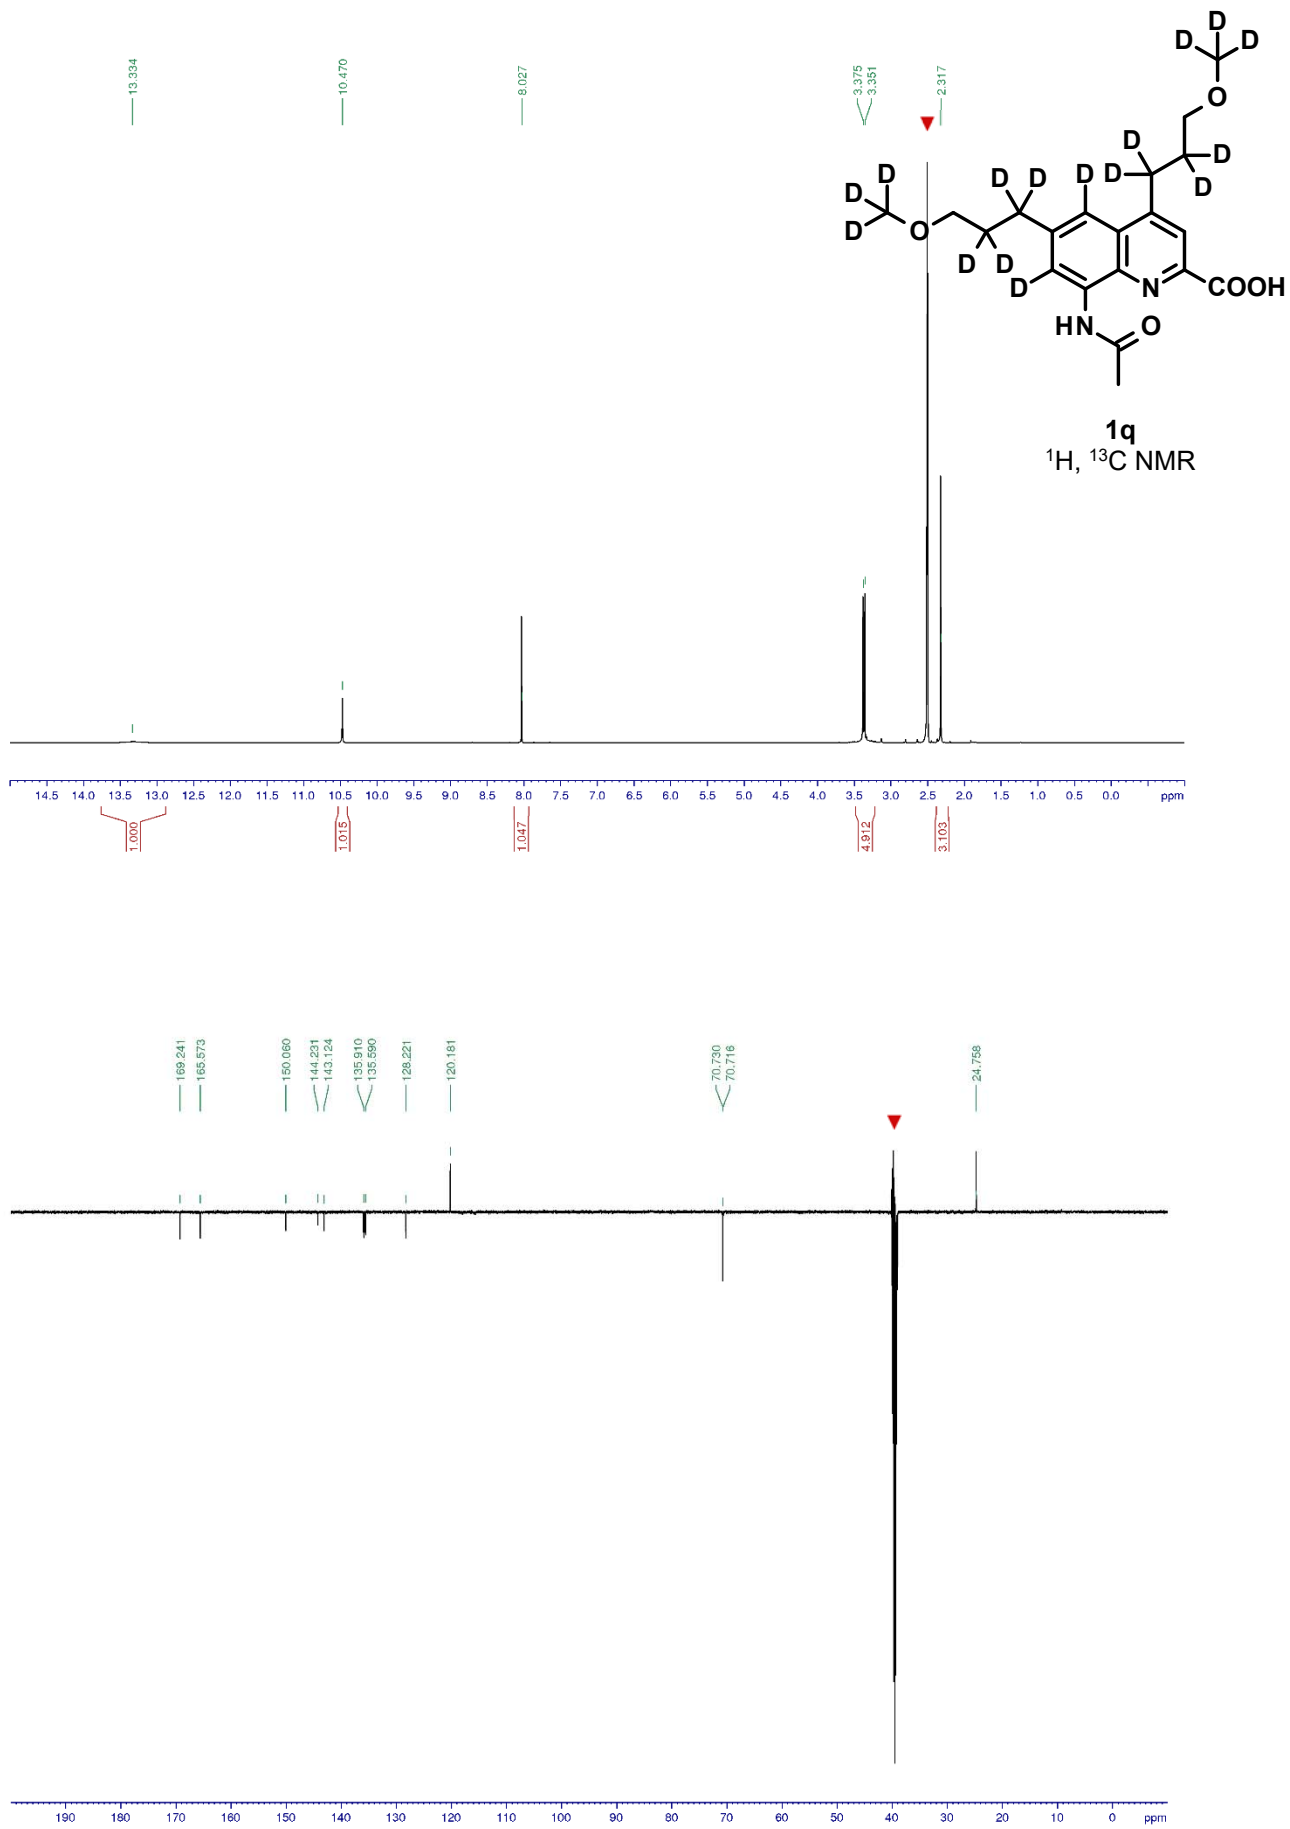

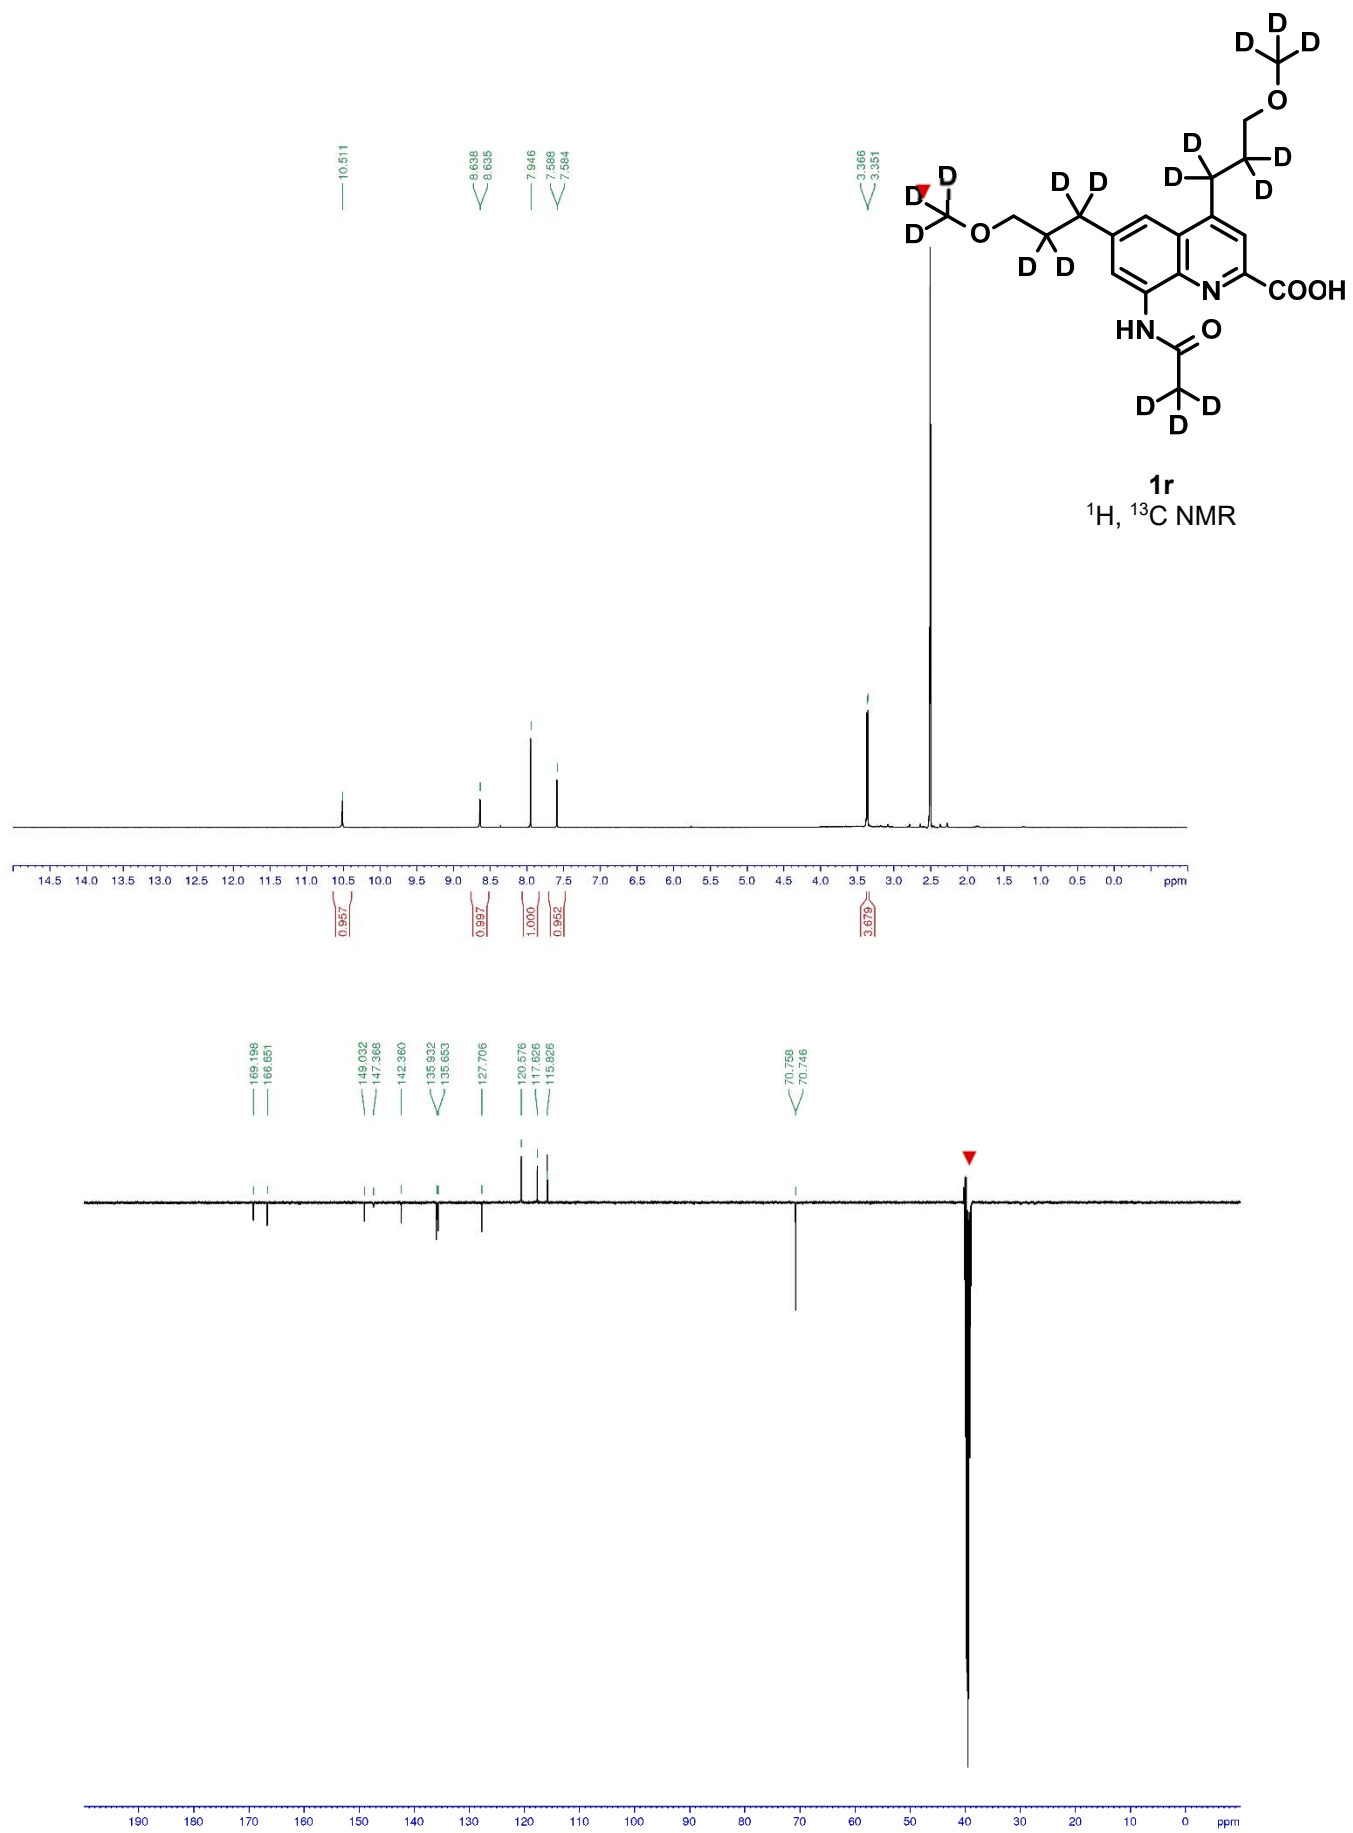

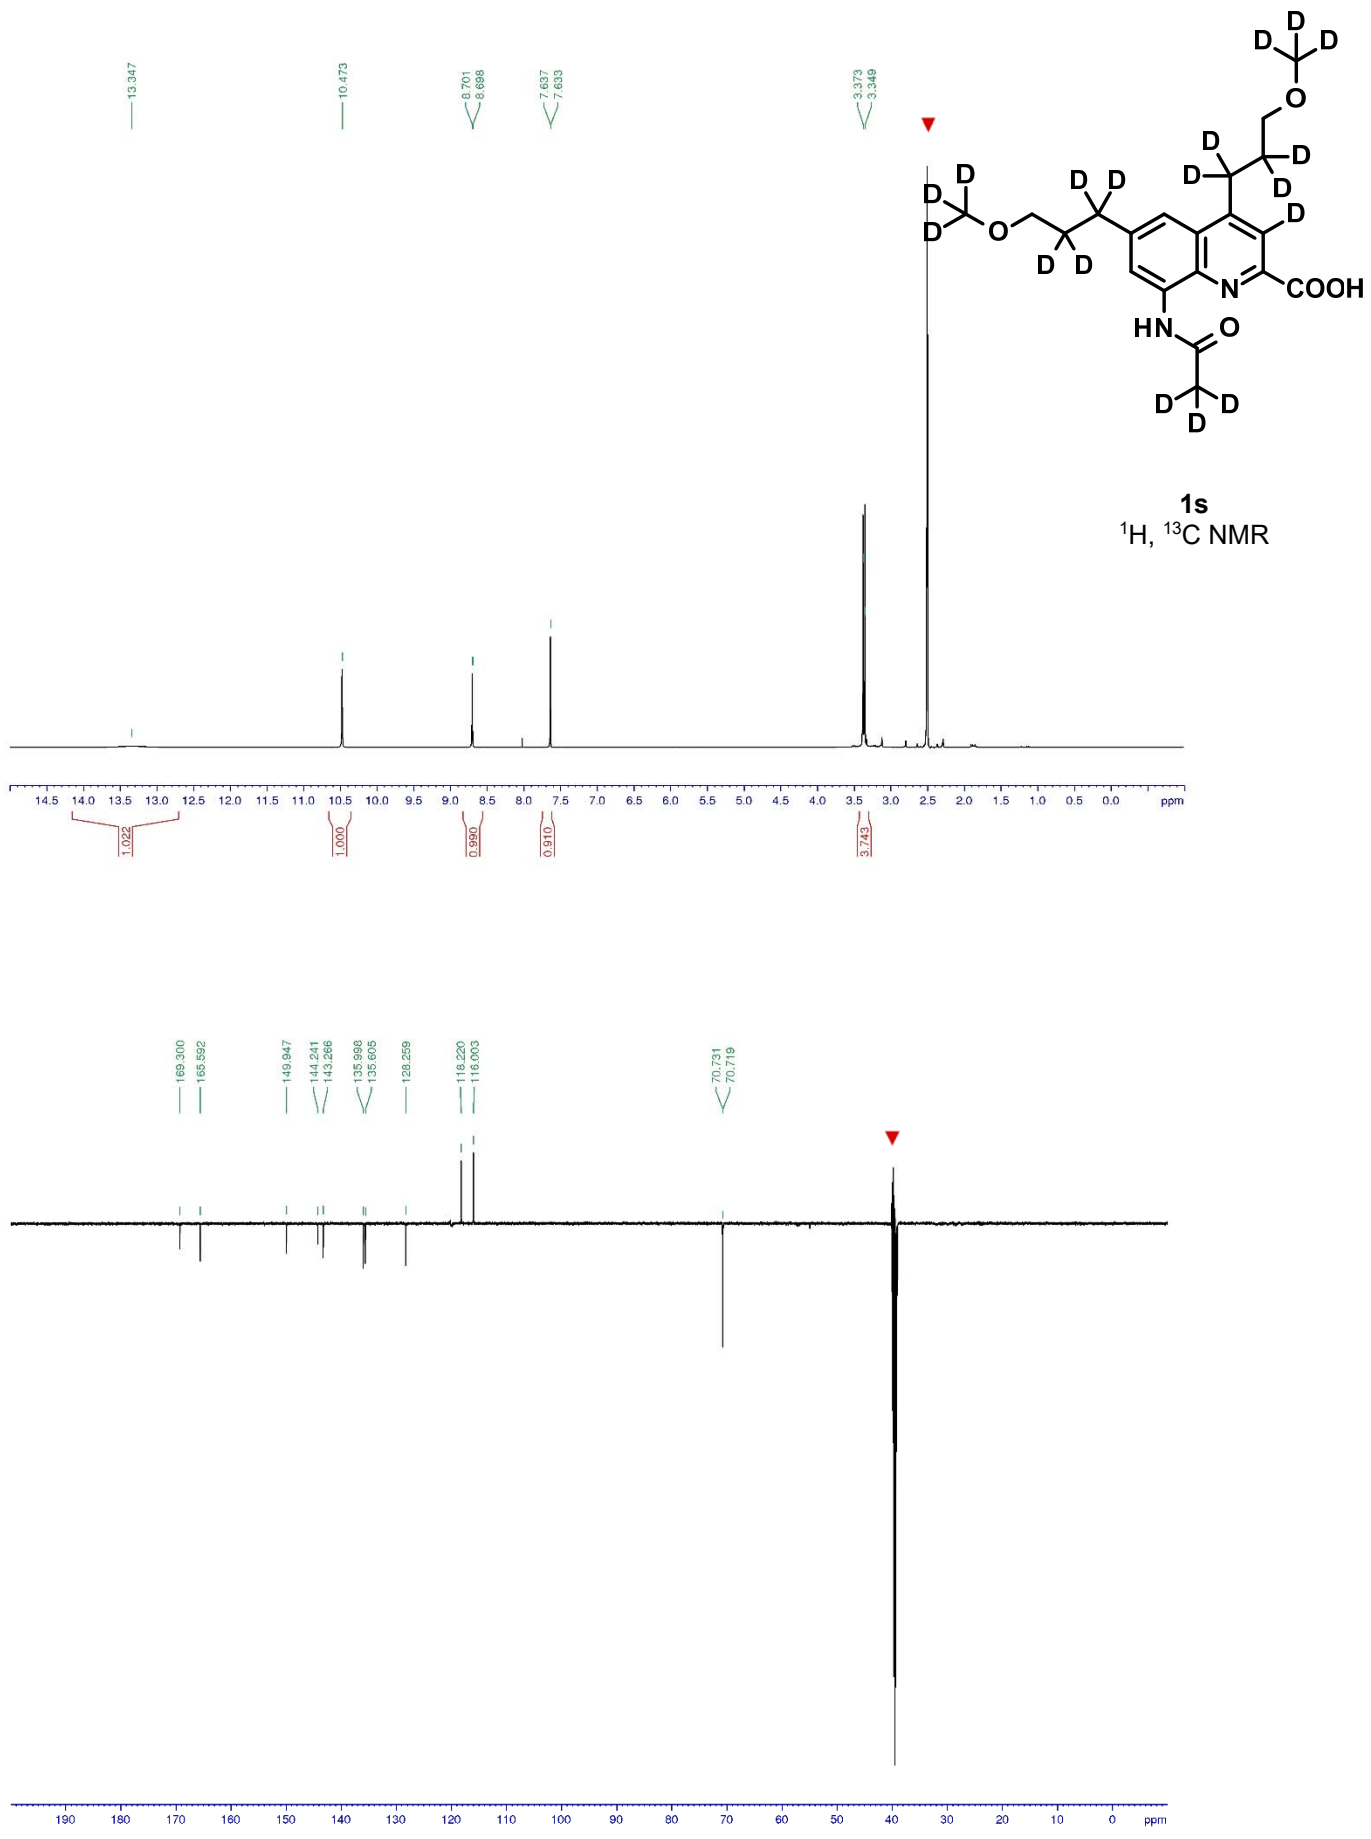



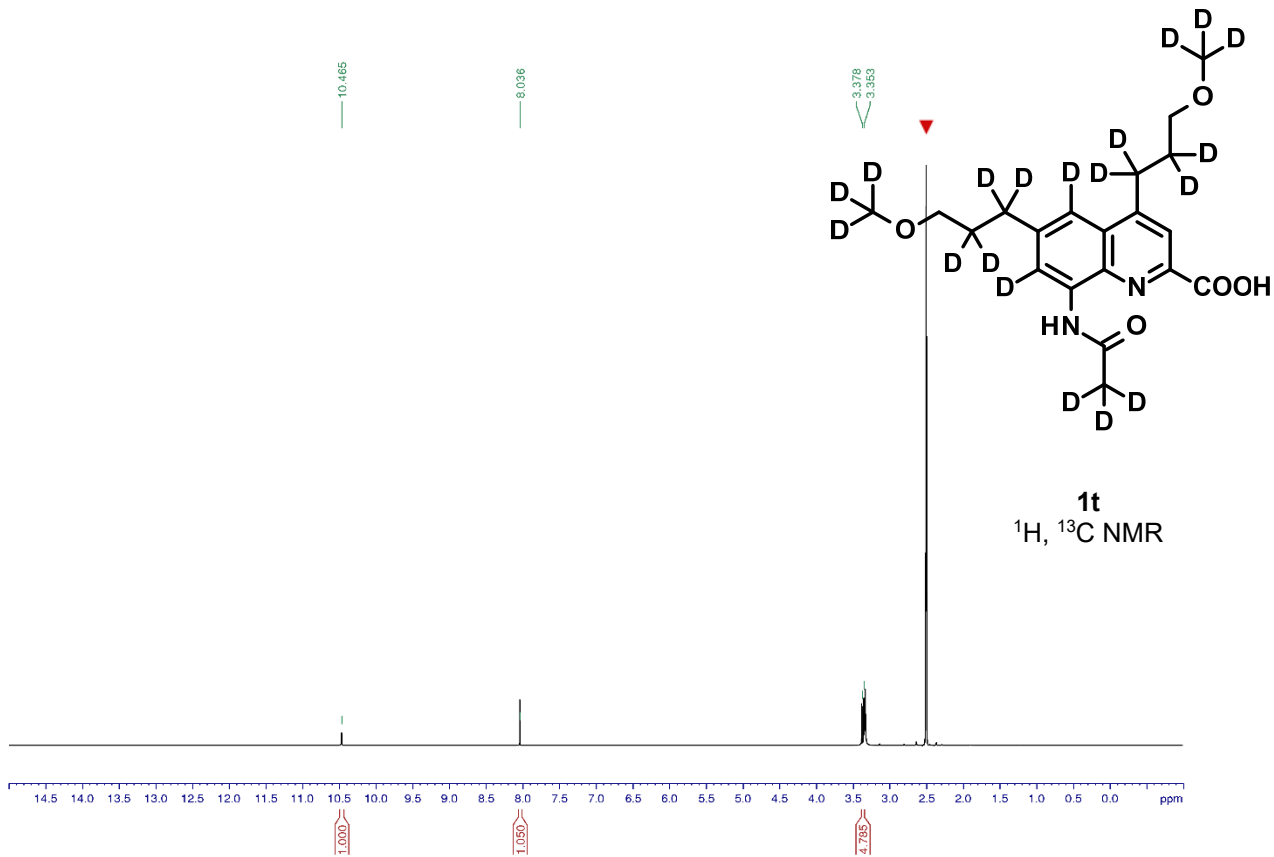

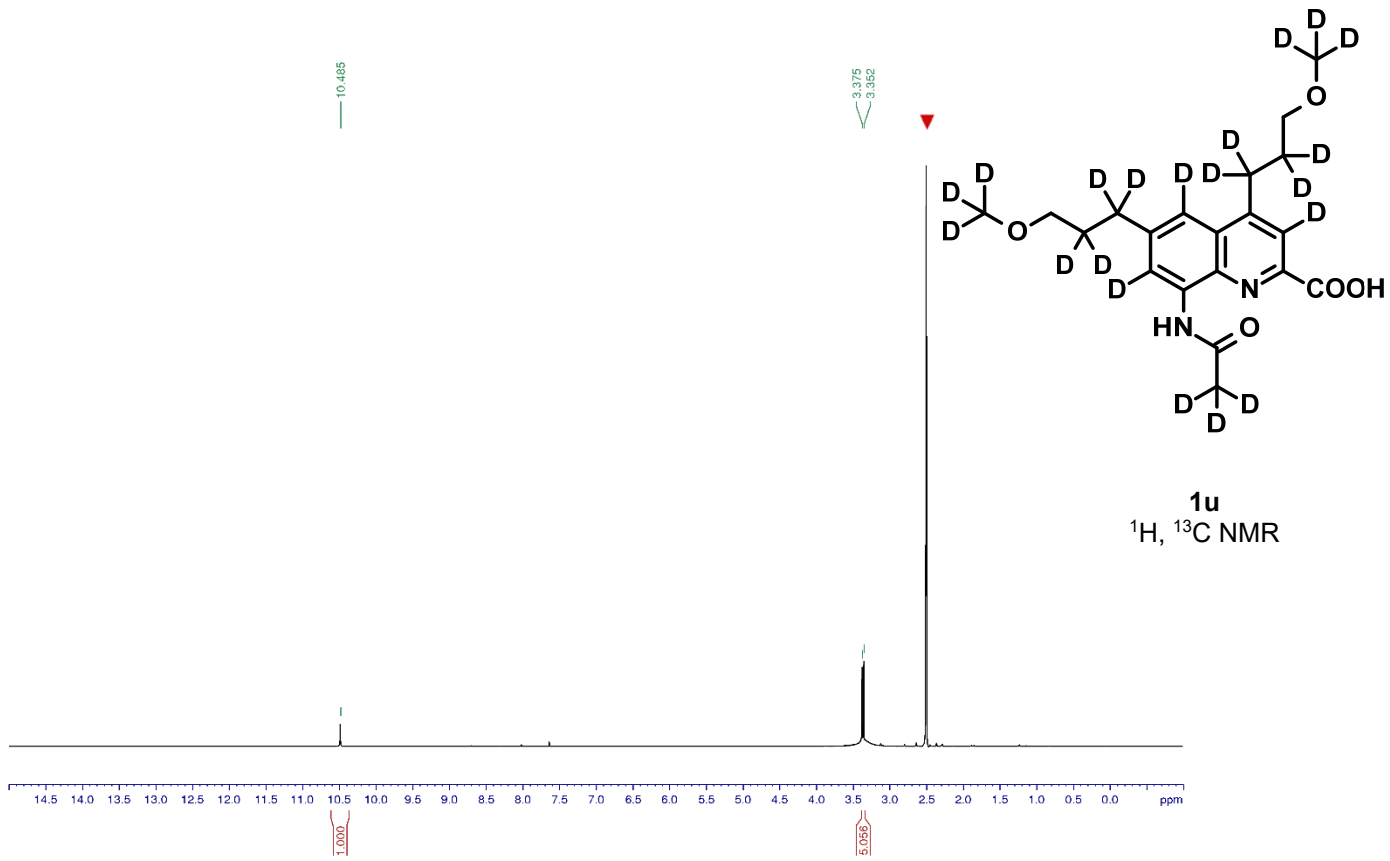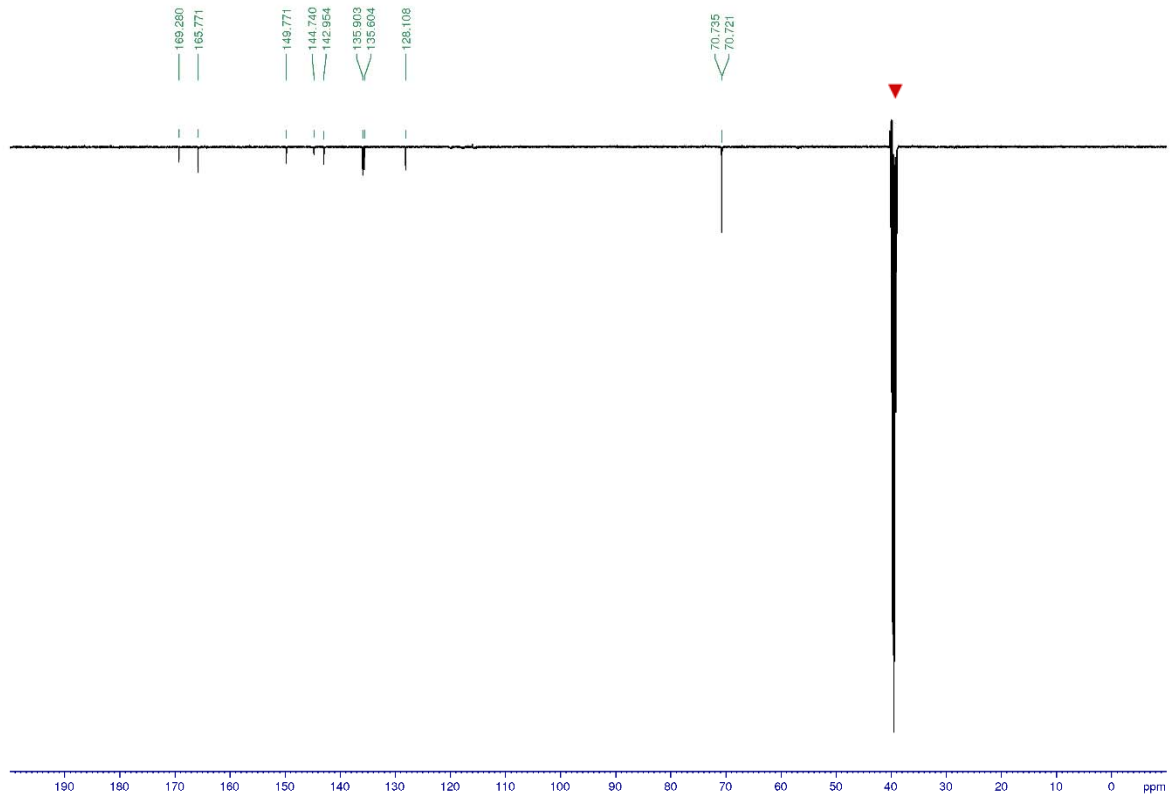

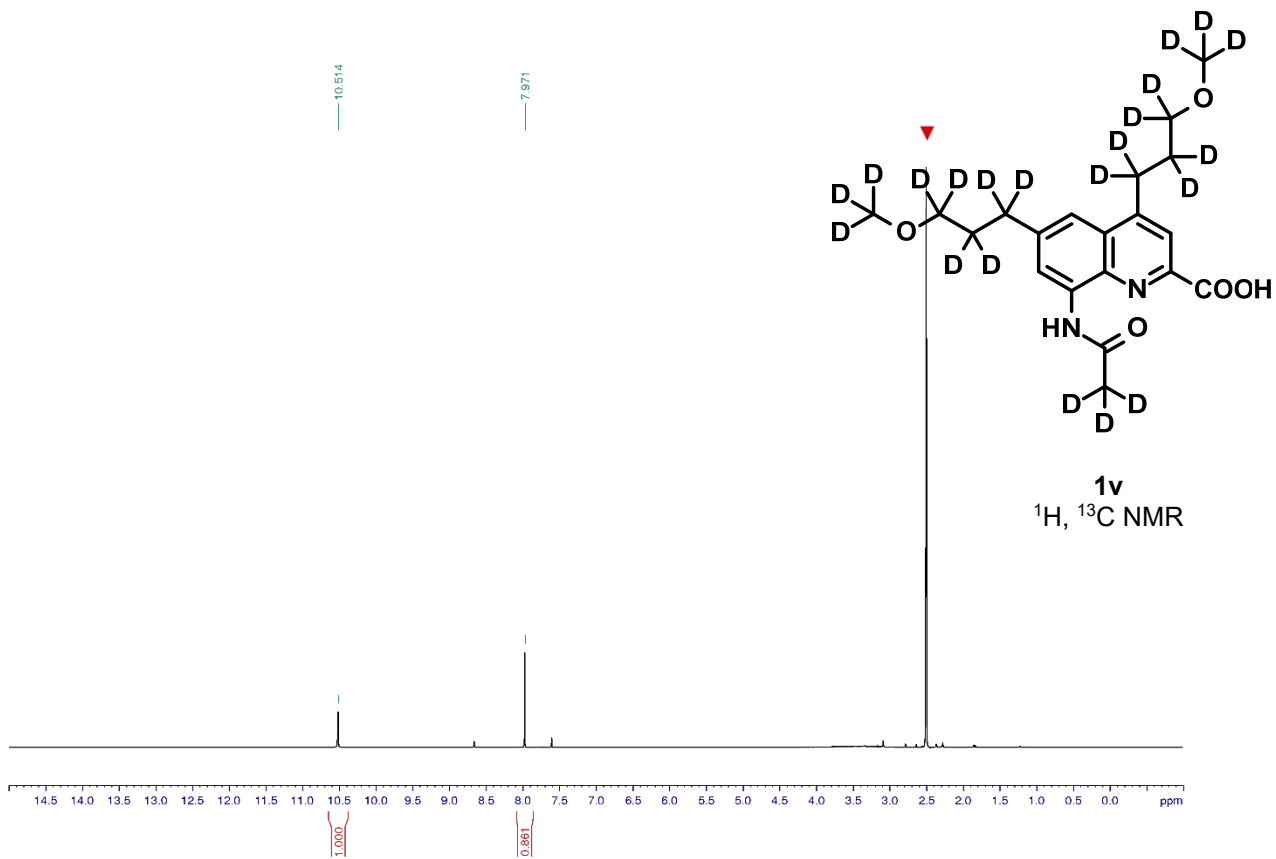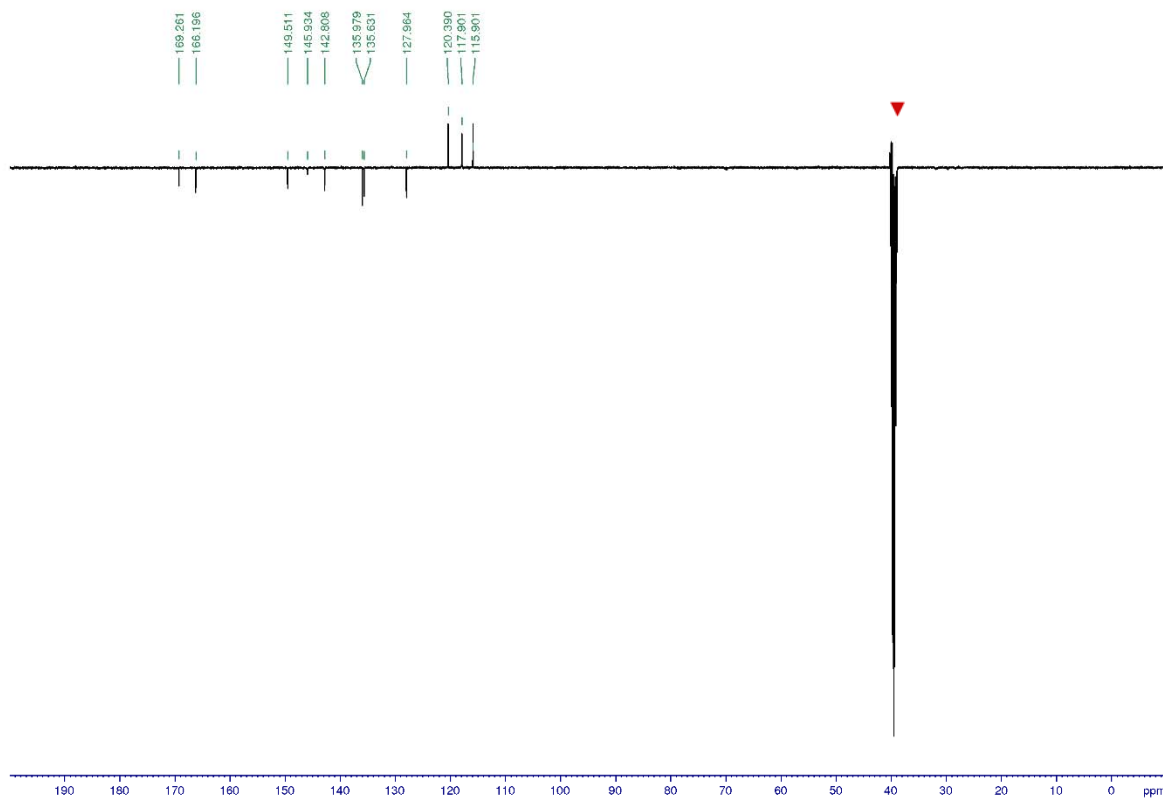

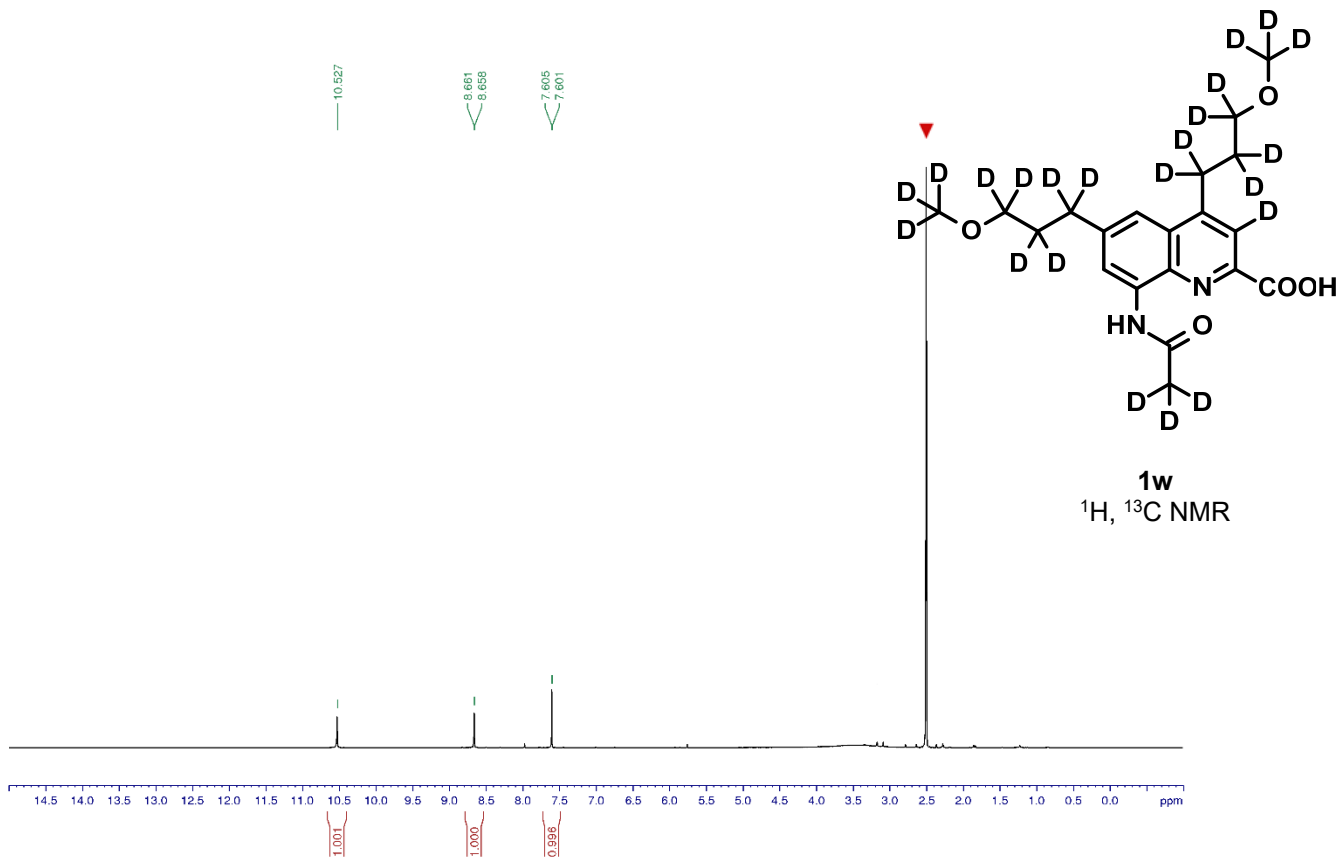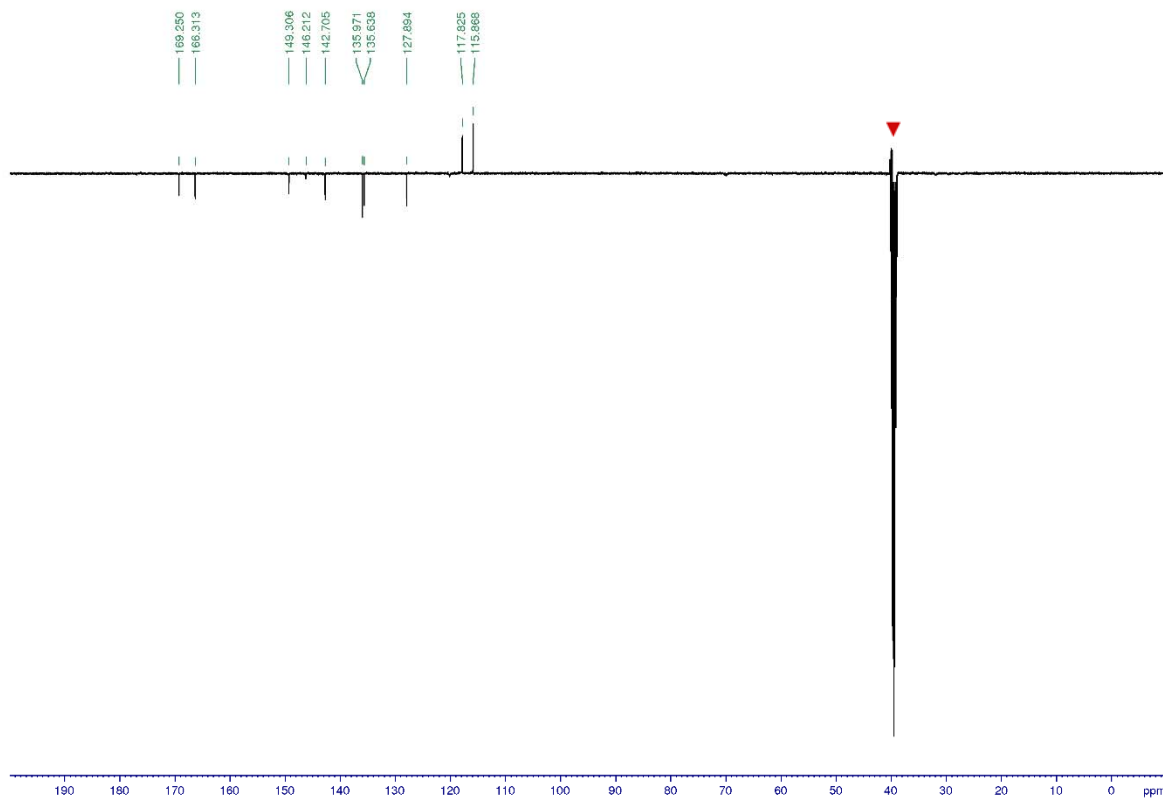

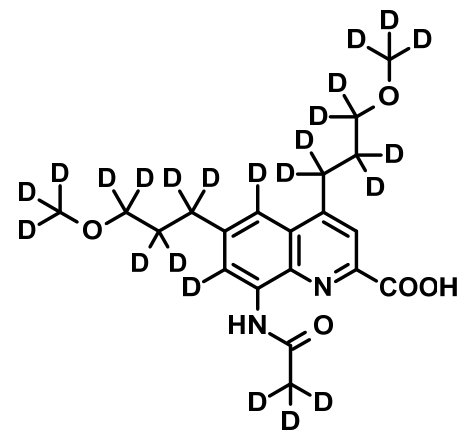

**1x**  
 $^1\text{H}, ^{13}\text{C}$  NMR

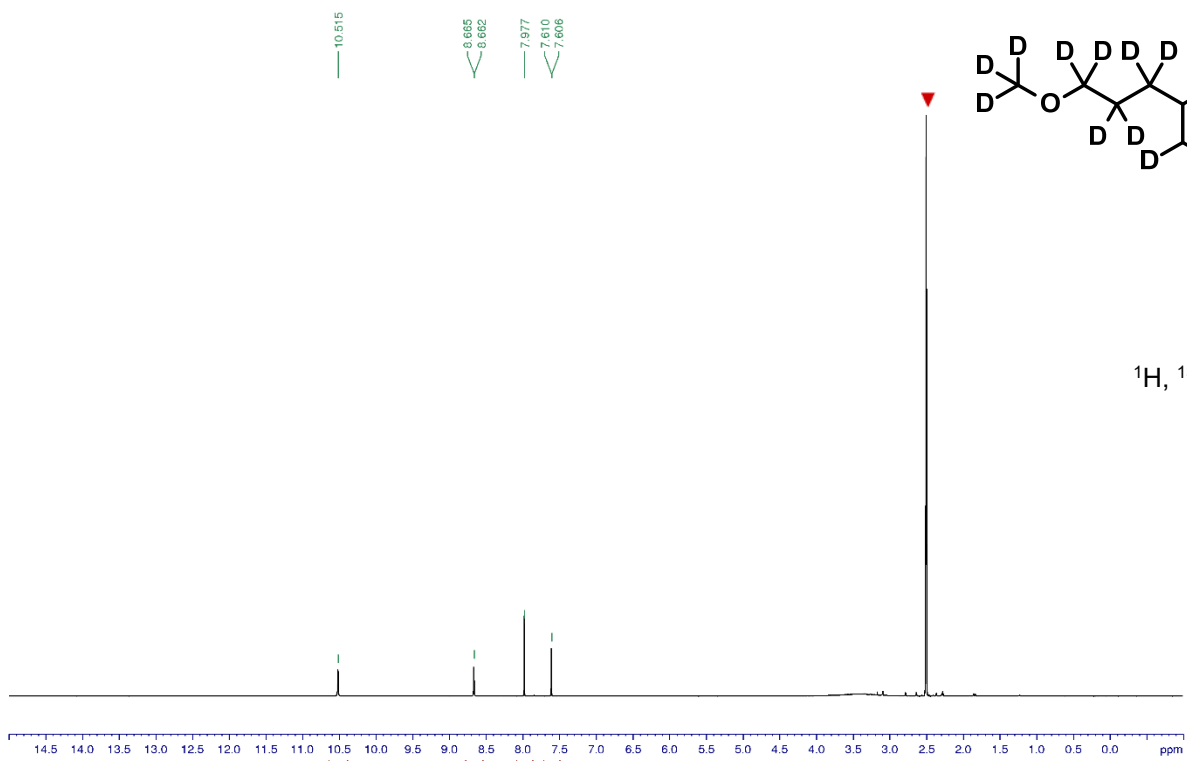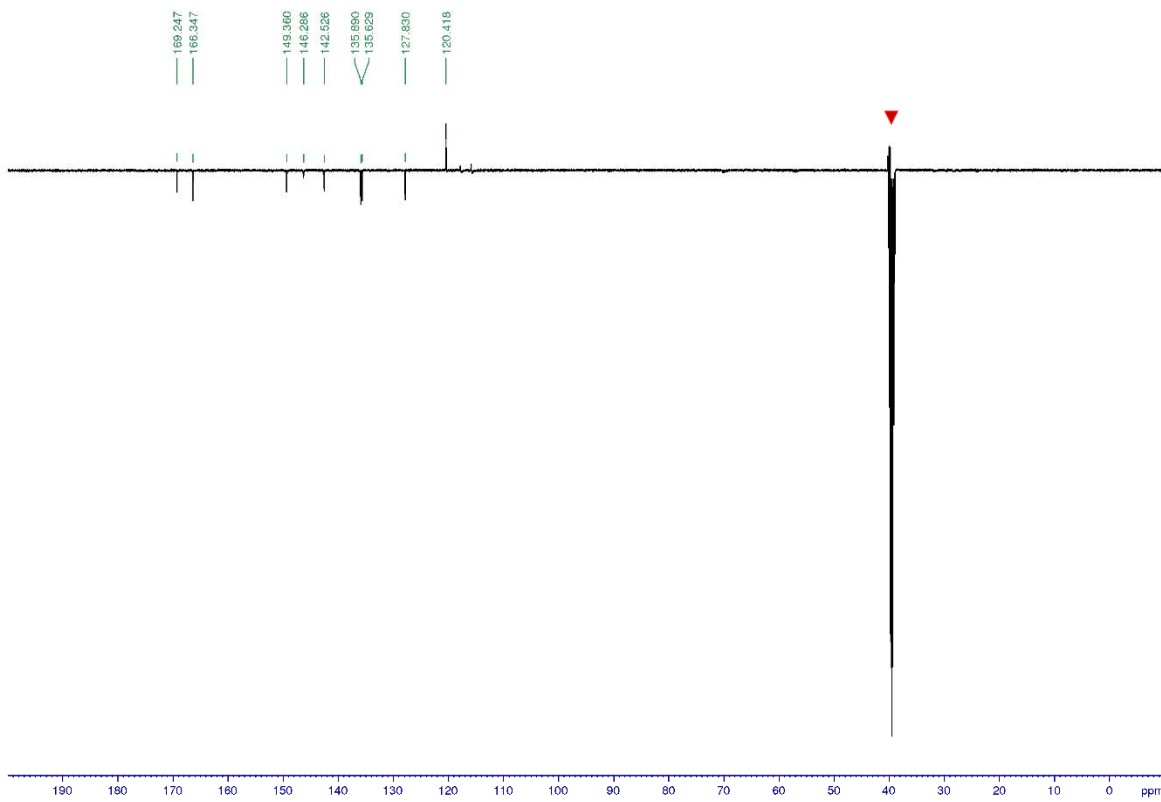

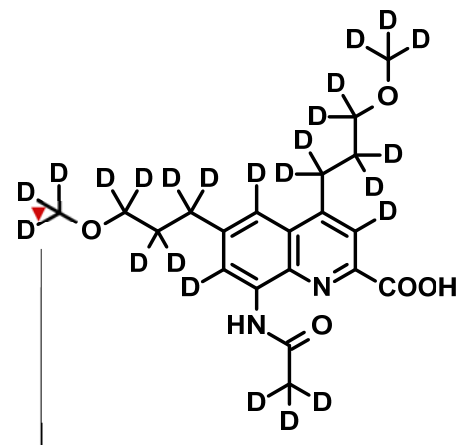

**1y**  
<sup>1</sup>H, <sup>13</sup>C NMR

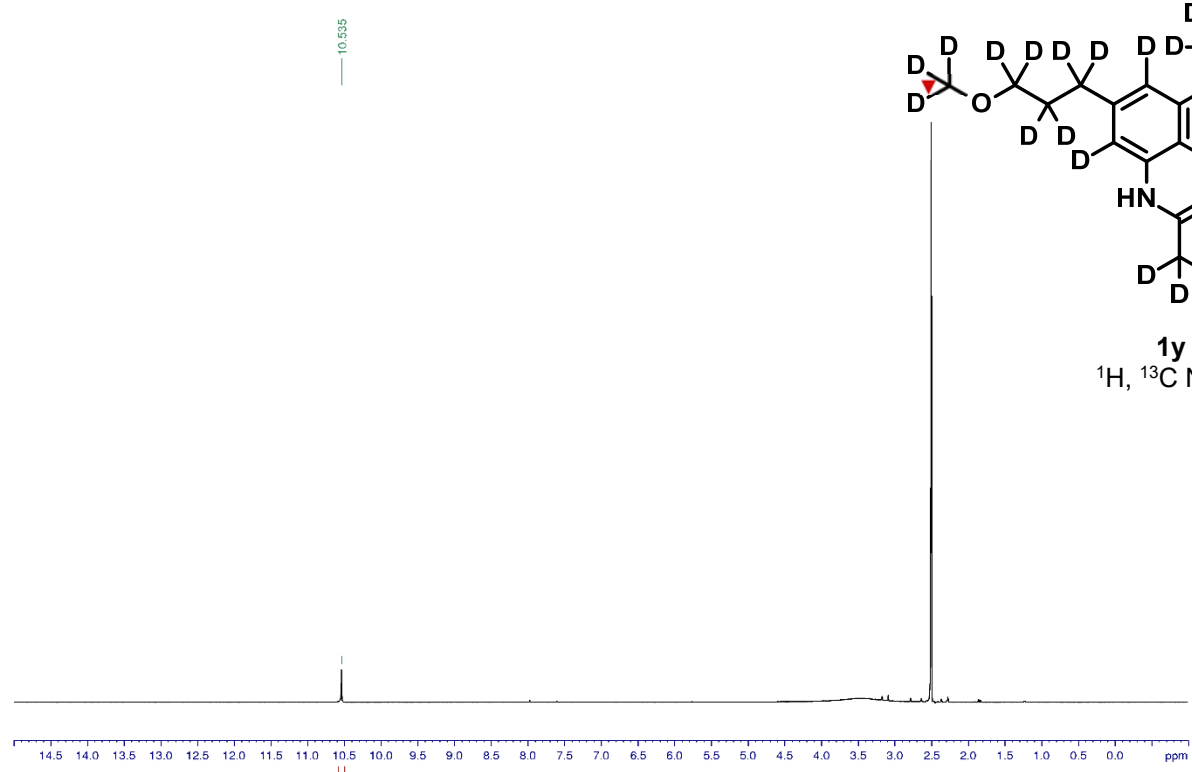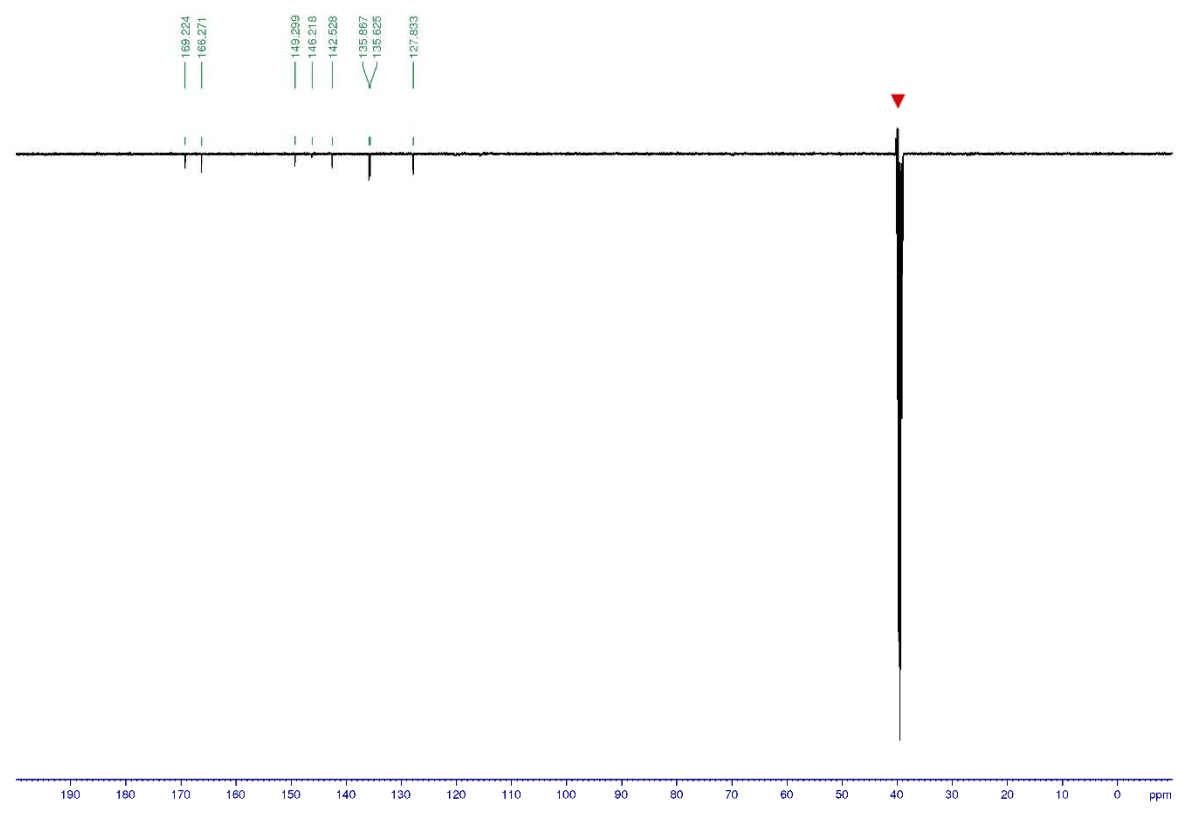

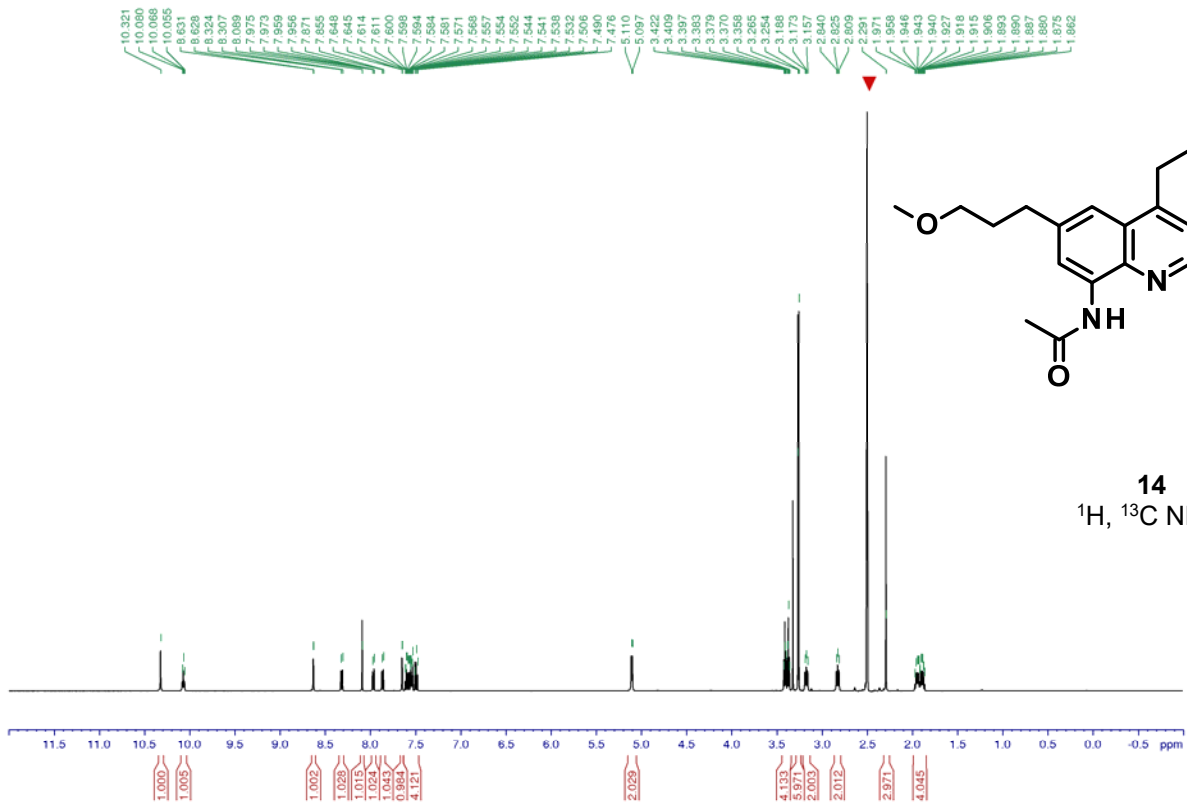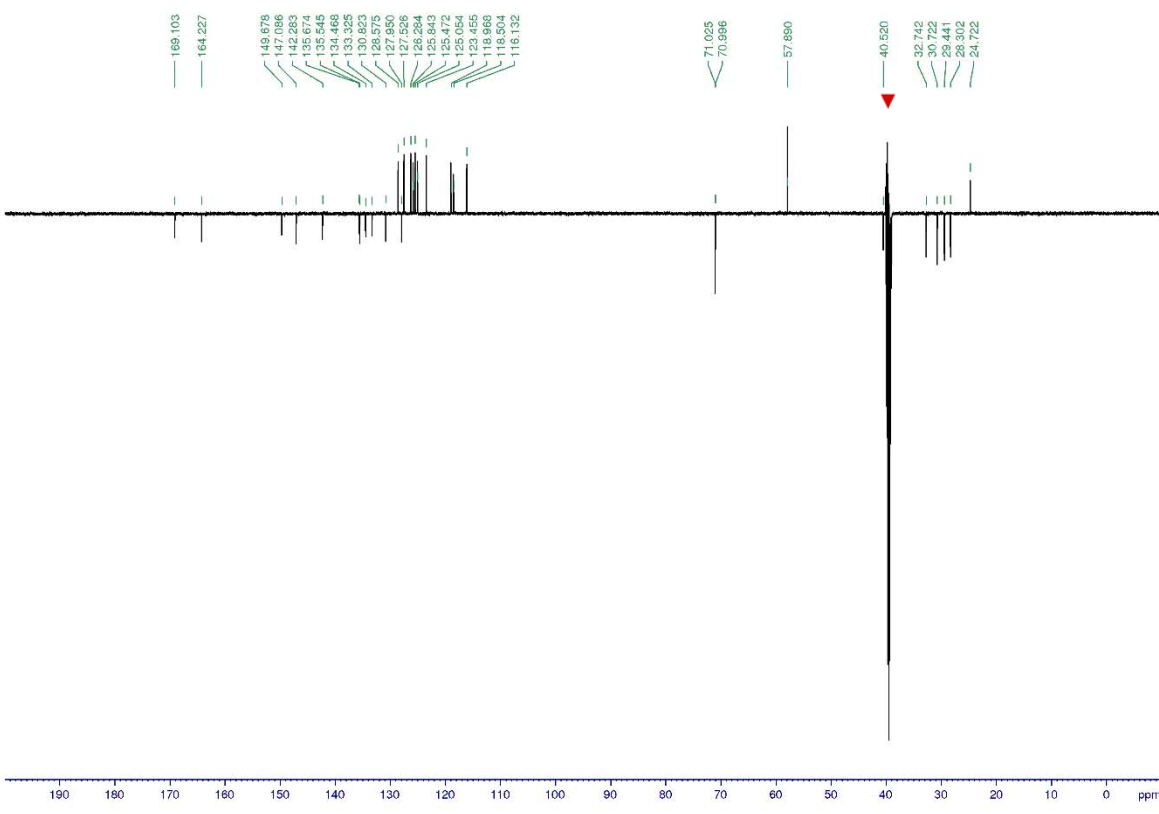

## 4.4 HRMS measurements and evaluation of the 1a-1y series

### 4.4.1 Conditions for HRMS measurements

To establish the optimal conditions for code reading by MS we prepared a dilution series of **1a** in acetonitrile, determined their signal range, and based on the results we settled on injecting 2  $\mu\text{L}$  of 0.001 mg/mL solutions for measuring MS fingerprints. Approximately 0.01 mg/mL stock solutions of **1a-y** were prepared in propionitrile with an accuracy of 1%. Mixtures were prepared by measuring the individual components (**1a-y**) into a vial using Sartorius Tacta mechanical 1-channel pipettes and the volume was adjusted to 1 mL using acetonitrile. To measure the MS fingerprints of the mixtures 2  $\mu\text{L}$  aliquots were injected onto an Agilent 1290 Infinity II- Agilent 6545 LC-QTOF instrument having an InfinityLab Poroshell 120 SB-C18, 2.1 mm, 1.9  $\mu\text{m}$  column. In case of the HRMS measurements of the **1a-y** components and all the mixtures prepared from them, 3 parallel measurements were carried out and the given peak areas and compositions are based on their average value and the presented HRMS spectra is picked from these three.

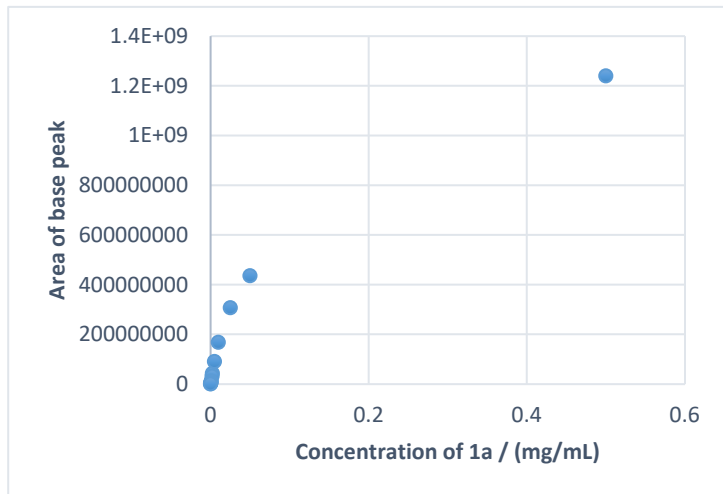

Scheme S1. Base peak areas of different concentrations of **1a** solutions.

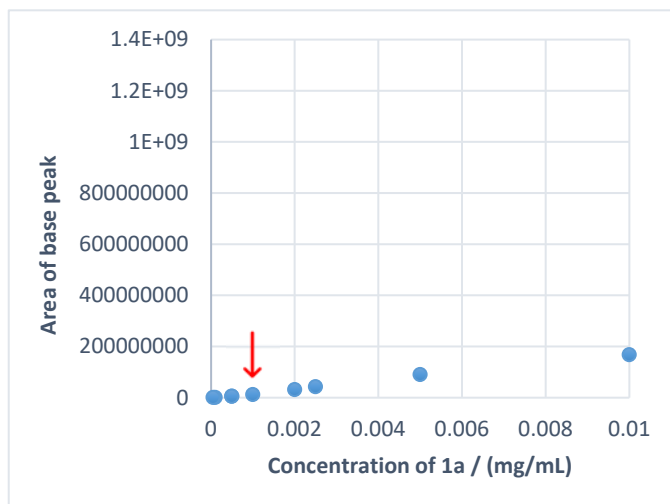

Scheme S2. Linearity range and the chosen concentration of **1a** based on the base peak areas of different concentrations.

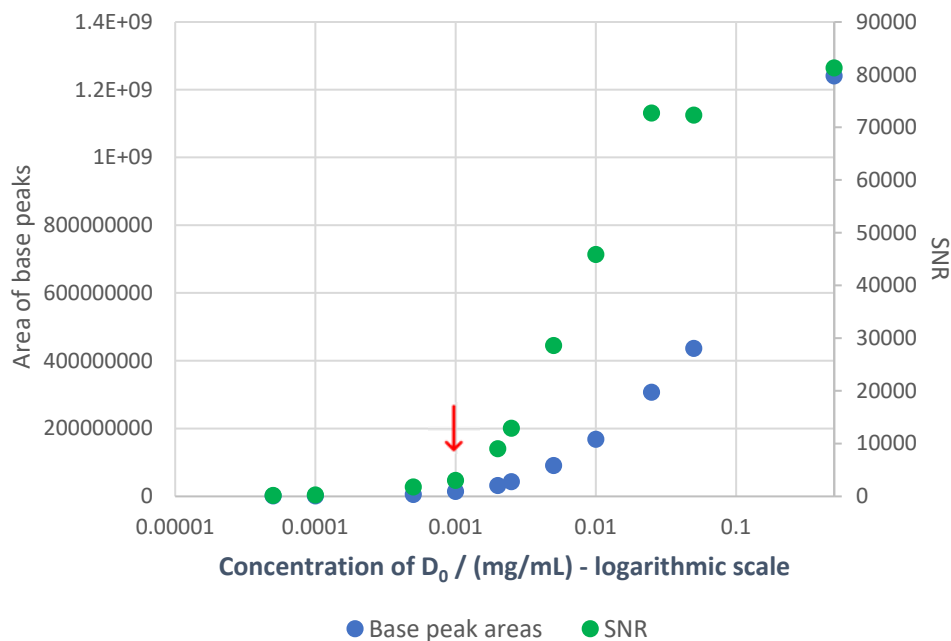

Scheme S3. Using the default **SNR calculation** algorithms of Agilent MassHunter Qualitative Analysis Navigator B.08.00 software, S/N ratios for the peaks at  $m/z=375$  were calculated and plotted for all test concentrations, **S/N = 2978** for the chosen concentration.



The **mass spectrometric resolution** for component **1a** was determined by Agilent MassHunter Qualitative Analysis Navigator B.08.00 software as following:  $R = \text{FWHM}(m)/m = 375.1919/0.01089 = 34442$ , where FWHM is the full width at half-maximum of the peak at  $m/z = 375$ .

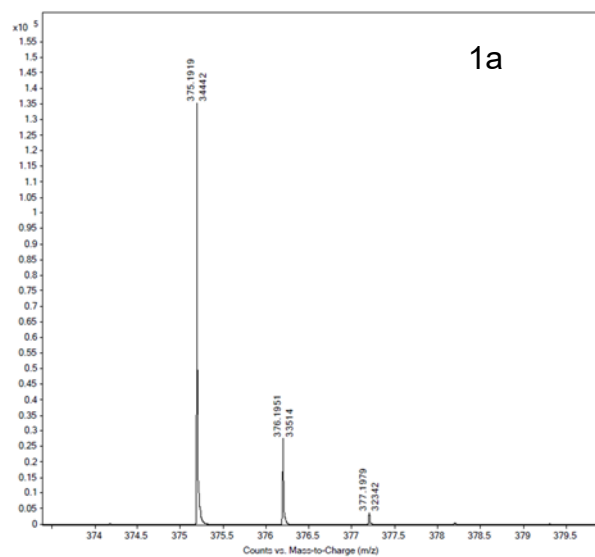

Scheme S4. The mass spectrum and mass spectrometric resolution of component **1a**.



**Table S5. Peak areas of [M+H]<sup>+</sup> masses of 1o-1y in HRMS spectra.**

|           | 375 | 376 | 377 | 378 | 379 | 380 | 381  | 382   | 383   | 384   | 385   | 386    | 387    | 387    | 388     | 389     | 390     | 391     | 392     | 393     | 394     | 395     | 396     | 397     | 398     | 399     | 400    | 401   | 402   | 403  |   |
|-----------|-----|-----|-----|-----|-----|-----|------|-------|-------|-------|-------|--------|--------|--------|---------|---------|---------|---------|---------|---------|---------|---------|---------|---------|---------|---------|--------|-------|-------|------|---|
| <b>1o</b> | 0   | 0   | 0   | 0   | 0   | 0   | 0    | 1928  | 11631 | 17257 | 36559 | 189677 | 388961 | 951709 | 4080967 | 1203976 | 267413  | 51971   | 14109   | 0       | 0       | 0       | 0       | 0       | 0       | 0       | 0      | 0     | 0     | 0    | 0 |
| <b>1p</b> | 0   | 0   | 0   | 0   | 0   | 0   | 0    | 1795  | 3918  | 4081  | 5020  | 16456  | 60685  | 331856 | 1268097 | 3951129 | 1363593 | 383484  | 90638   | 27959   | 9308    | 0       | 0       | 0       | 0       | 0       | 0      | 0     | 0     | 0    |   |
| <b>1q</b> | 0   | 0   | 0   | 0   | 0   | 0   | 0    | 0     | 0     | 2330  | 1022  | 8228   | 13046  | 17259  | 111980  | 827362  | 3988013 | 1198235 | 288722  | 56517   | 10380   | 0       | 0       | 0       | 0       | 0       | 0      | 0     | 0     | 0    |   |
| <b>1r</b> | 0   | 0   | 0   | 0   | 0   | 0   | 1349 | 6390  | 1583  | 10982 | 12565 | 16995  | 22111  | 46865  | 136569  | 700774  | 2678874 | 6020256 | 1656637 | 347330  | 68322   | 21654   | 5059    | 0       | 0       | 0       | 0      | 0     | 0     | 0    |   |
| <b>1s</b> | 0   | 0   | 0   | 0   | 0   | 0   | 0    | 0     | 0     | 0     | 585   | 5051   | 3019   | 4834   | 21725   | 88018   | 404140  | 1332696 | 2952178 | 1016348 | 275663  | 65218   | 18968   | 9553    | 0       | 0       | 0      | 0     | 0     | 0    |   |
| <b>1t</b> | 0   | 0   | 0   | 0   | 0   | 0   | 0    | 10473 | 9636  | 17343 | 3195  | 11980  | 5207   | 11713  | 16688   | 33243   | 106463  | 586927  | 2902354 | 9184089 | 2436117 | 505988  | 84207   | 23612   | 9457    | 0       | 0      | 0     | 0     | 0    |   |
| <b>1u</b> | 0   | 0   | 0   | 0   | 0   | 0   | 3663 | 7769  | 16981 | 13666 | 4918  | 12332  | 7436   | 0      | 6263    | 28898   | 61053   | 158591  | 776037  | 3203584 | 7168041 | 1750129 | 327384  | 60534   | 18510   | 15082   | 5820   | 0     | 0     | 0    |   |
| <b>1v</b> | 0   | 0   | 0   | 0   | 0   | 0   | 0    | 0     | 0     | 0     | 0     | 0      | 0      | 0      | 15893   | 24984   | 72936   | 154894  | 286059  | 1212018 | 4153256 | 7408865 | 1663991 | 283901  | 45870   | 18282   | 11776  | 5431  | 0     | 0    |   |
| <b>1w</b> | 0   | 0   | 0   | 0   | 0   | 0   | 0    | 0     | 0     | 0     | 0     | 0      | 9224   | 0      | 0       | 6225    | 6107    | 15024   | 30960   | 152165  | 853176  | 3853787 | 9264283 | 2054228 | 339112  | 55594   | 14794  | 4833  | 0     | 0    |   |
| <b>1x</b> | 0   | 0   | 0   | 0   | 0   | 0   | 0    | 0     | 0     | 0     | 0     | 0      | 2560   | 0      | 1667    | 2924    | 7724    | 11452   | 16576   | 45204   | 215692  | 1153470 | 4355993 | 7830804 | 1575881 | 252986  | 37684  | 9034  | 5985  | 0    |   |
| <b>1y</b> | 0   | 0   | 0   | 0   | 0   | 0   | 0    | 0     | 0     | 0     | 0     | 0      | 0      | 0      | 0       | 0       | 0       | 0       | 0       | 7317    | 34476   | 156368  | 816646  | 3264754 | 6747591 | 1336144 | 205007 | 32433 | 12609 | 3246 |   |

Figure S2. HRMS of compounds **1b-z**

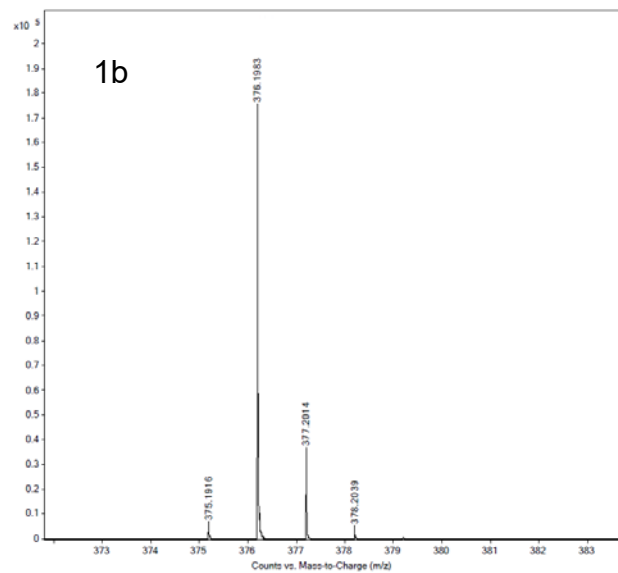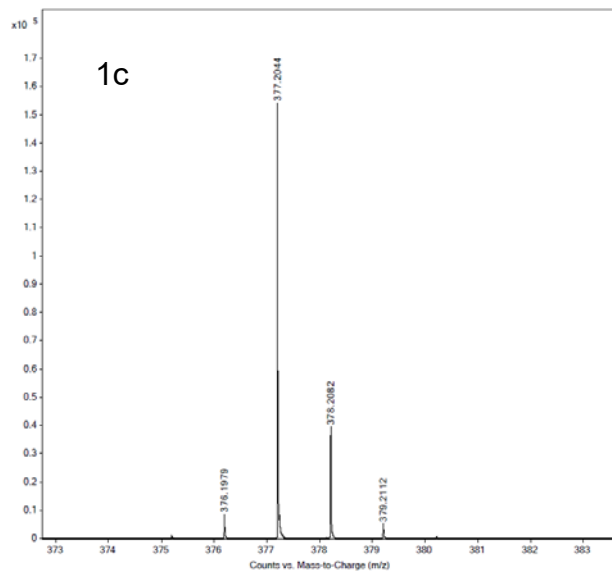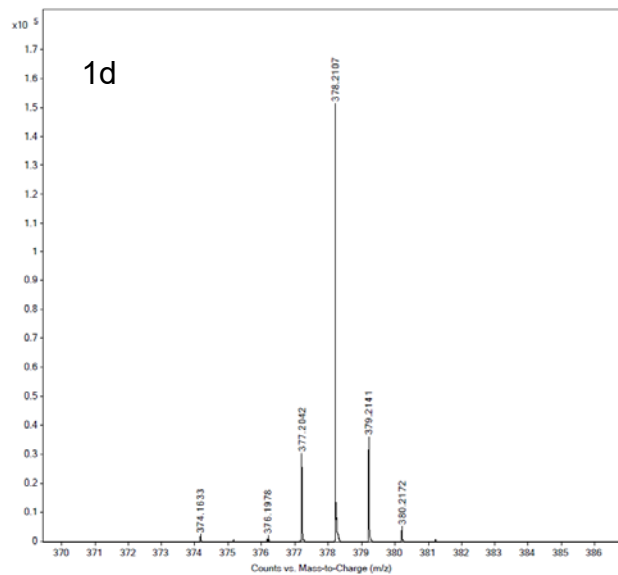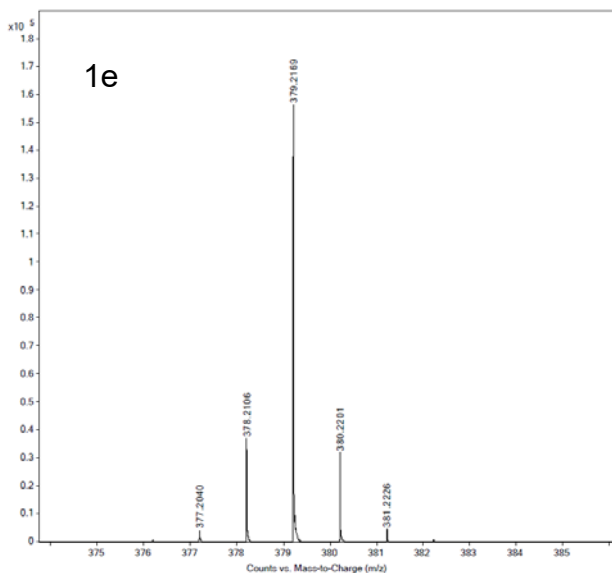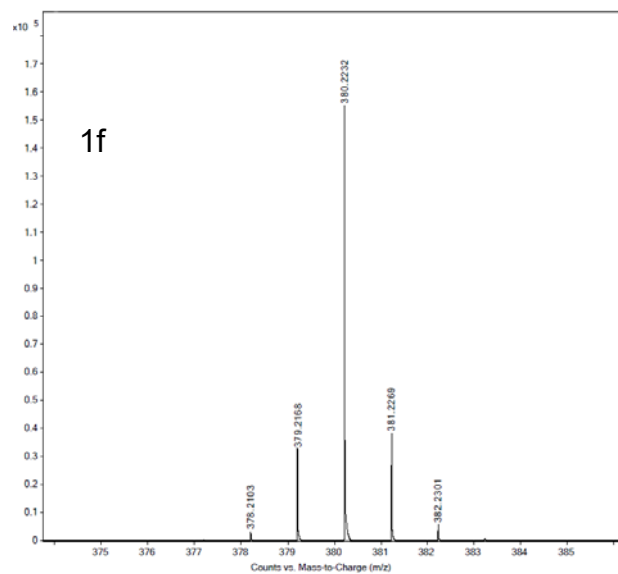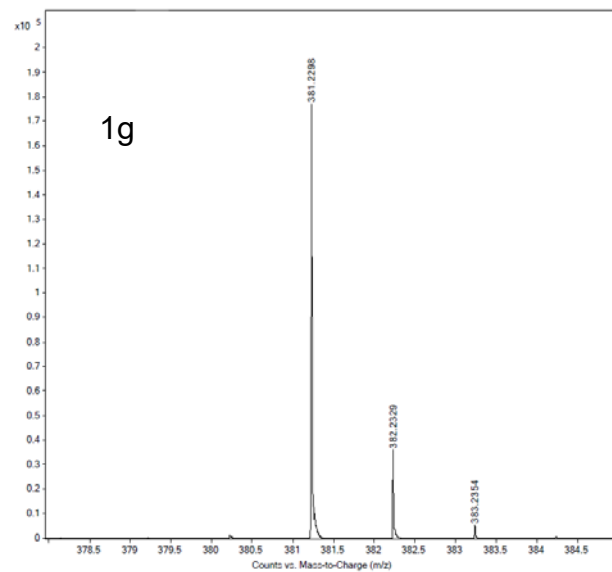

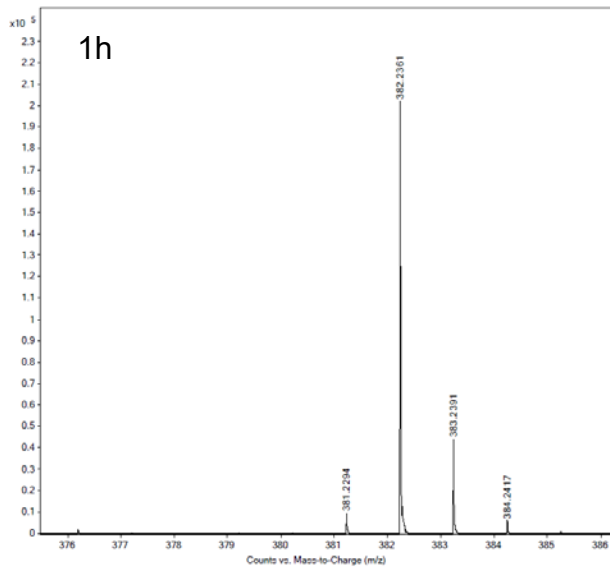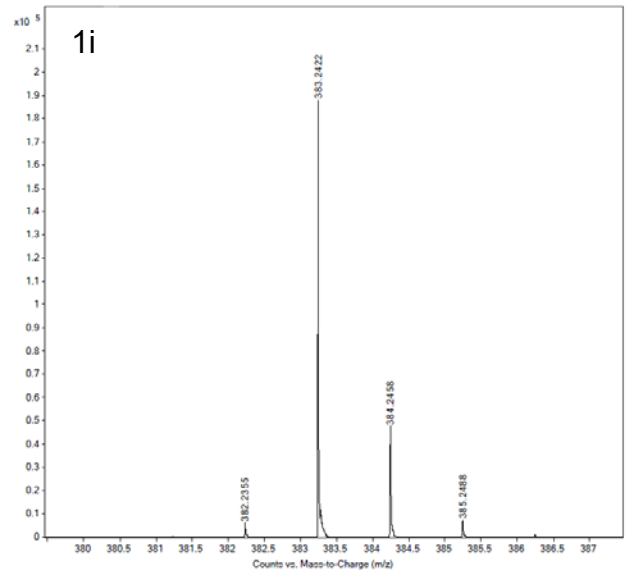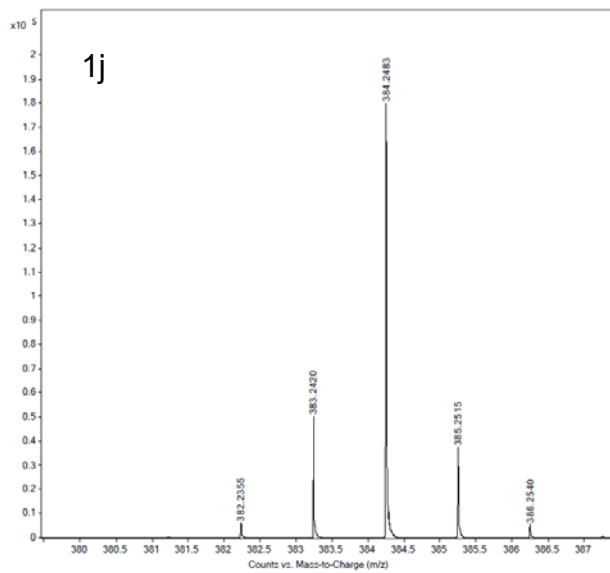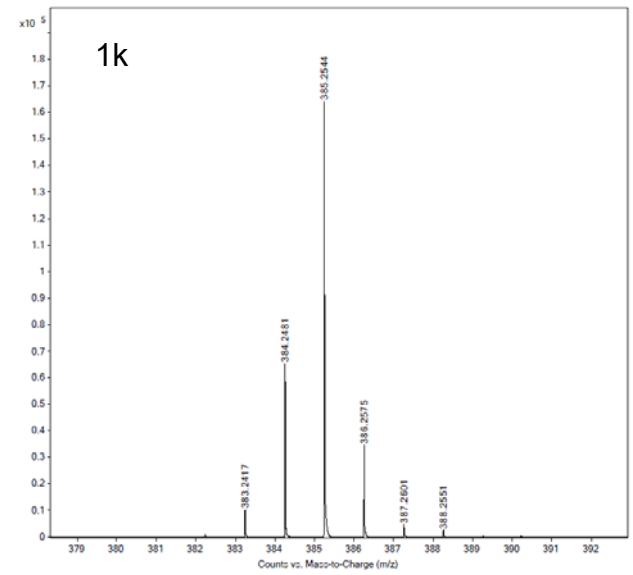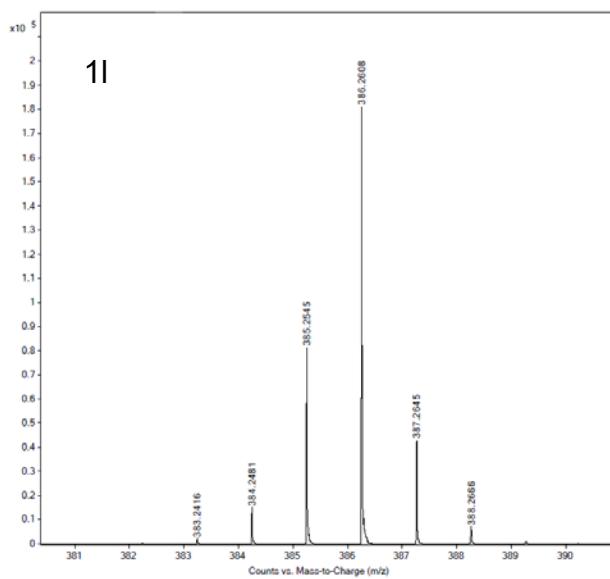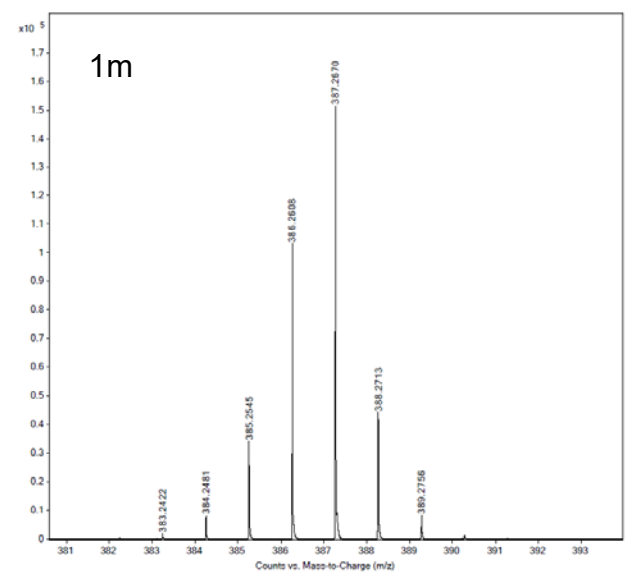

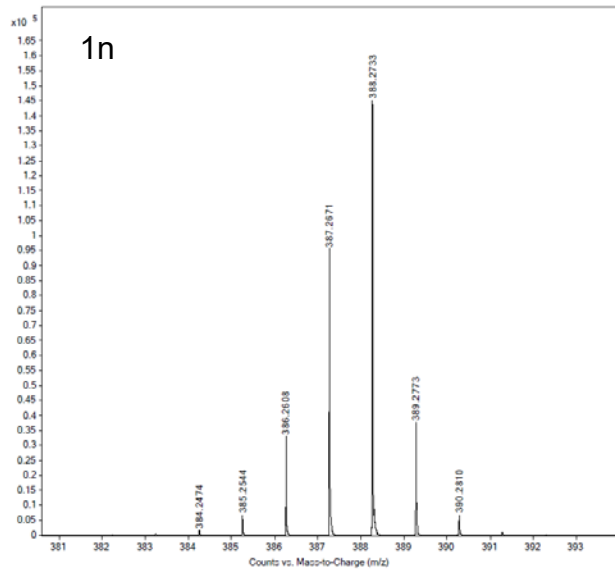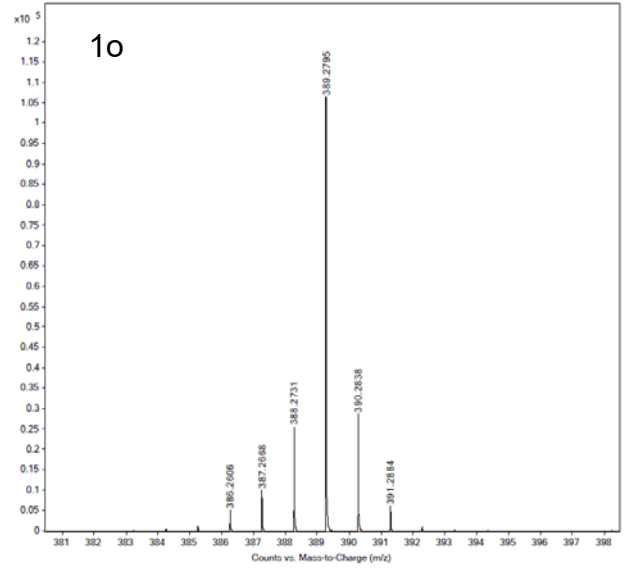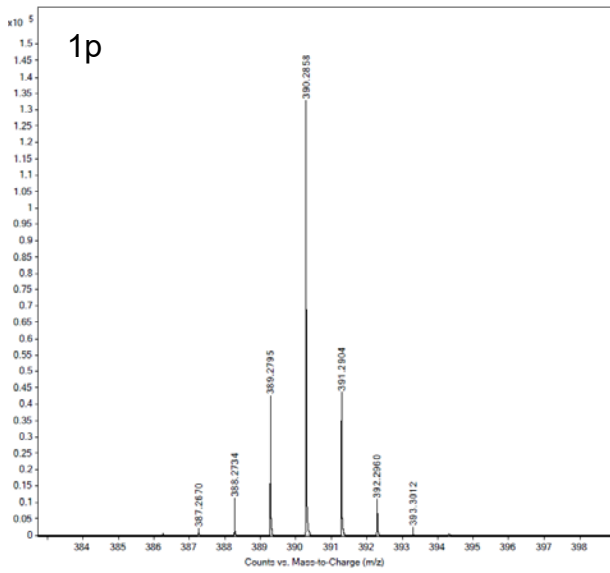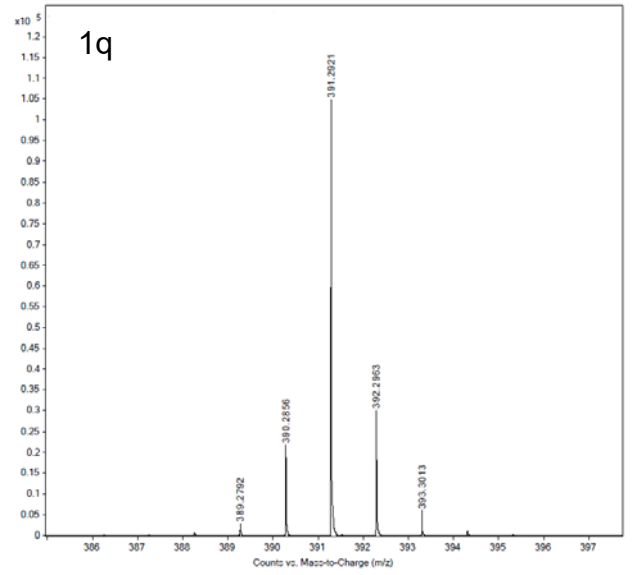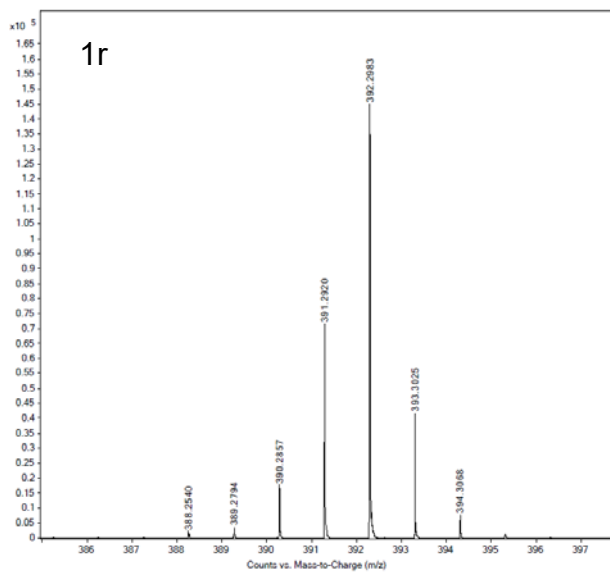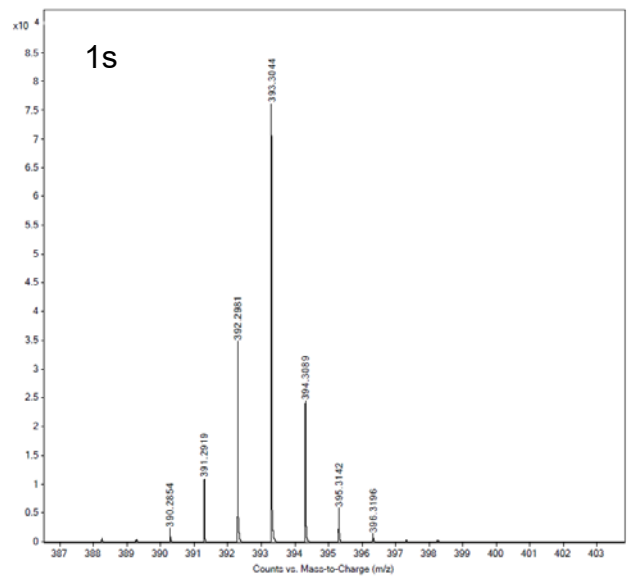

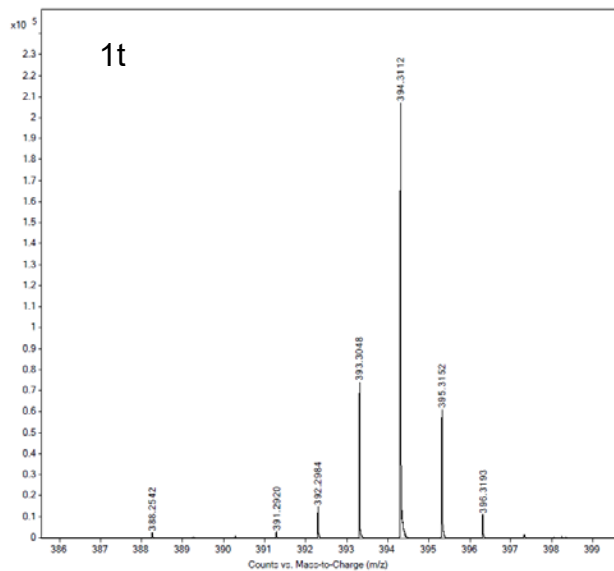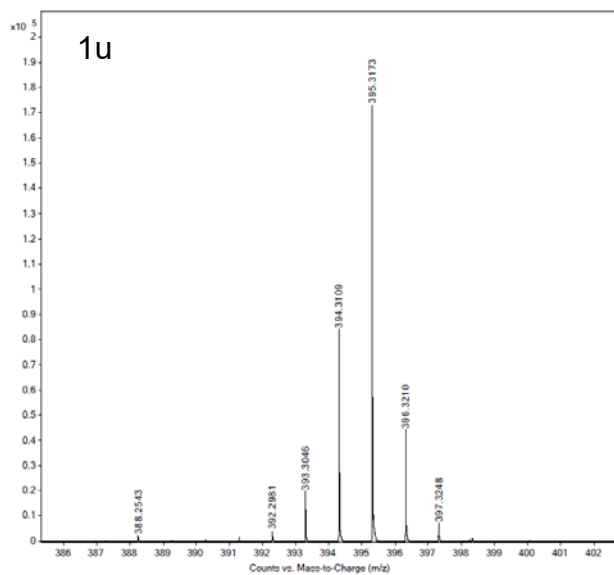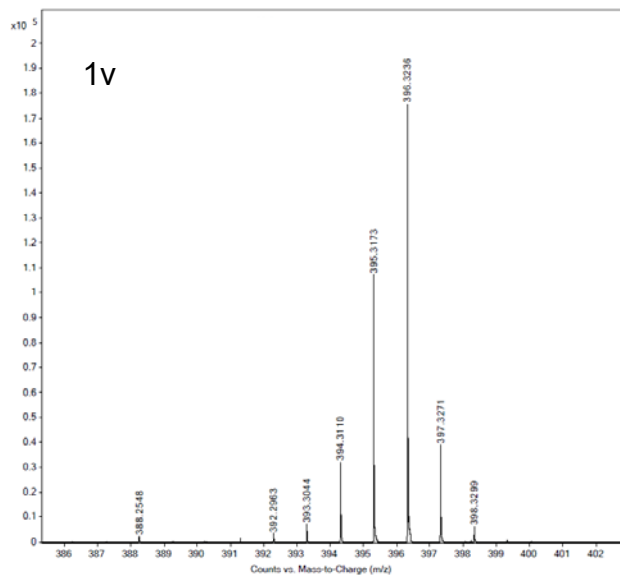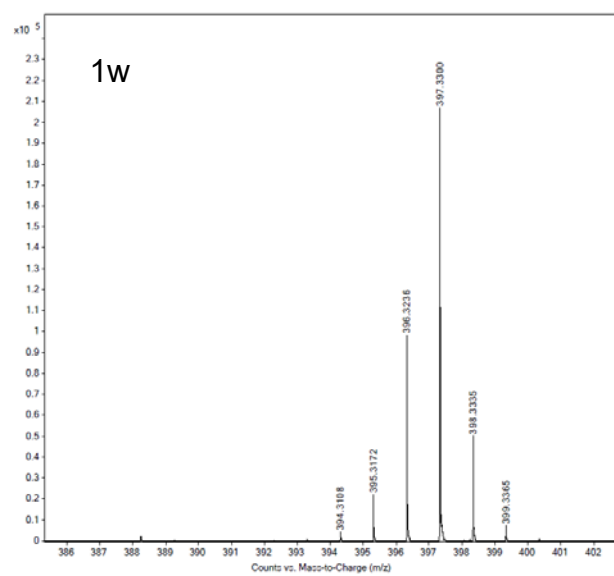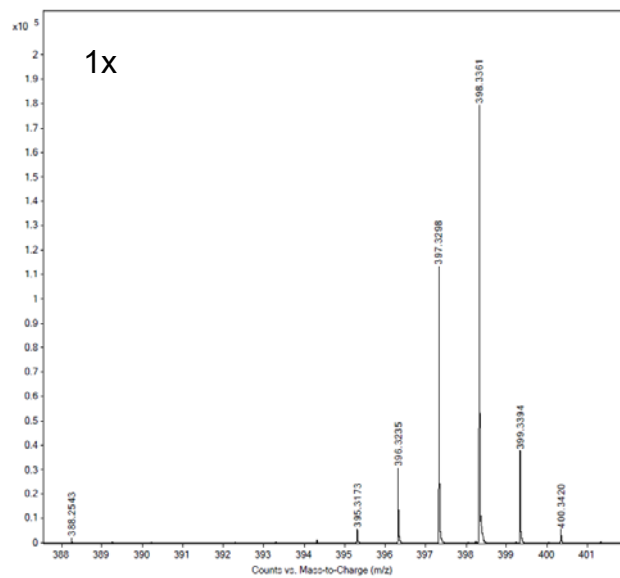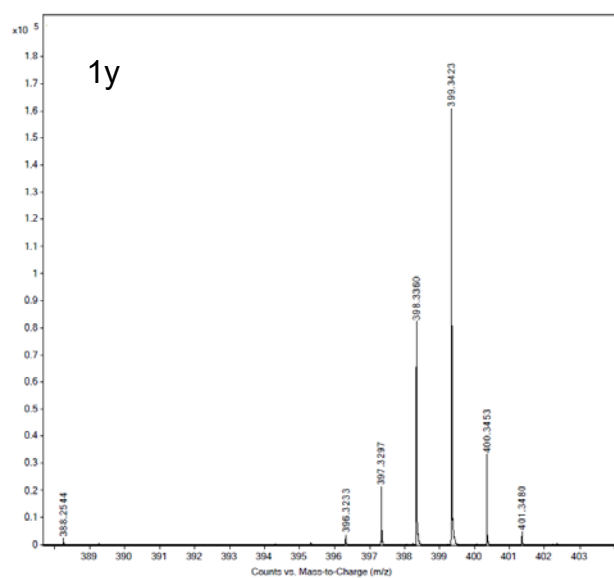







**Figure S3.** HRMS of mixtures **M1-M36D**

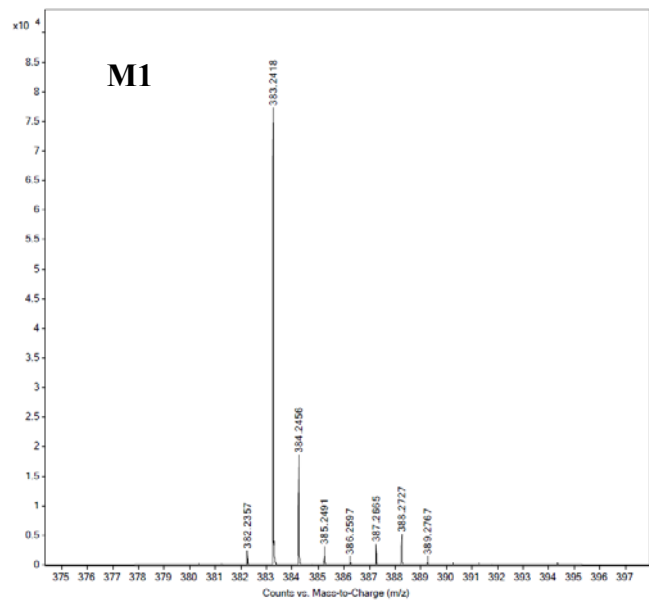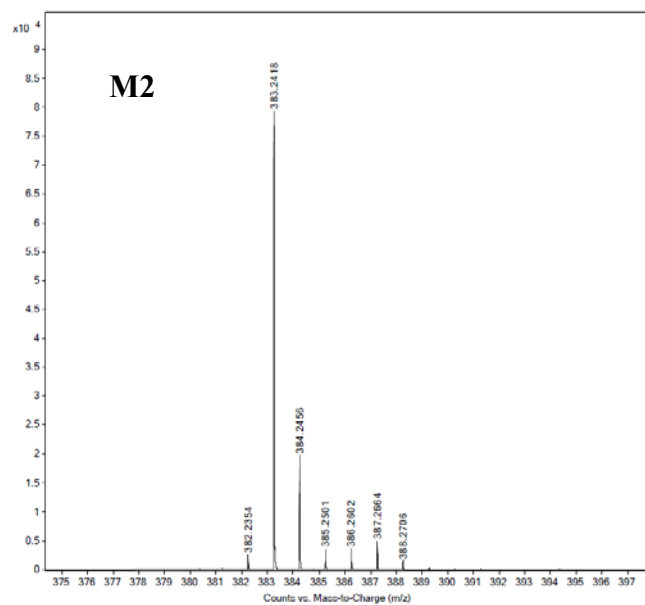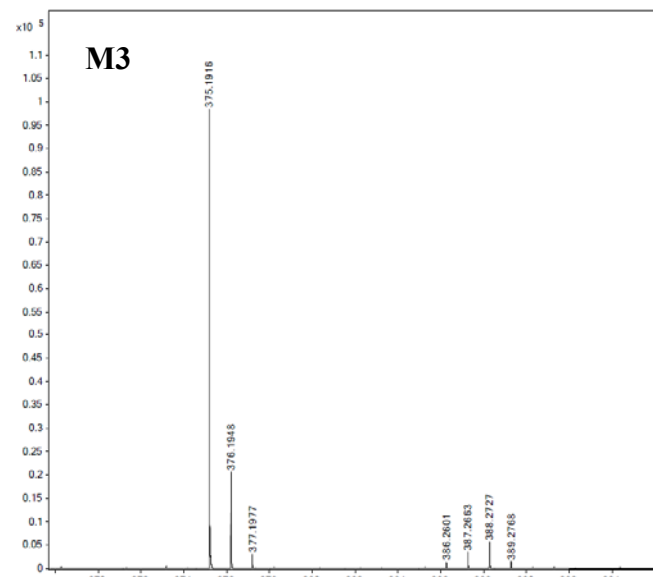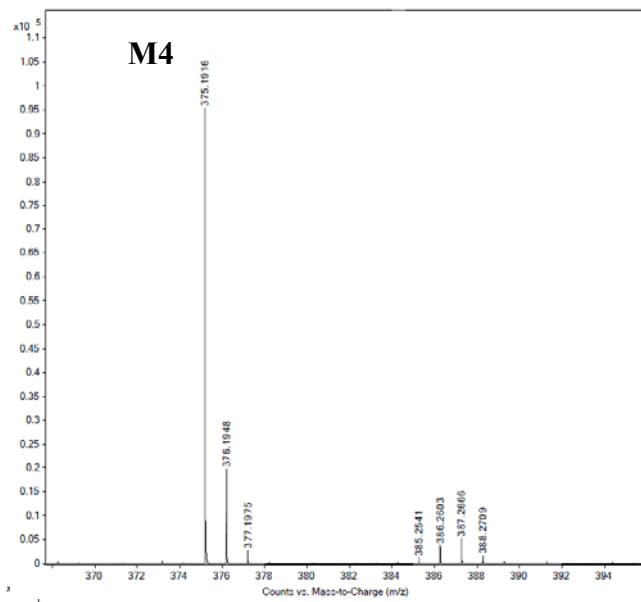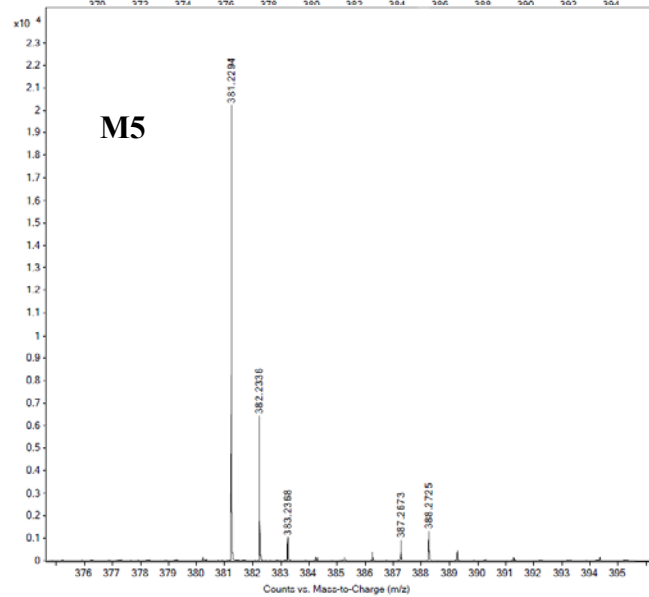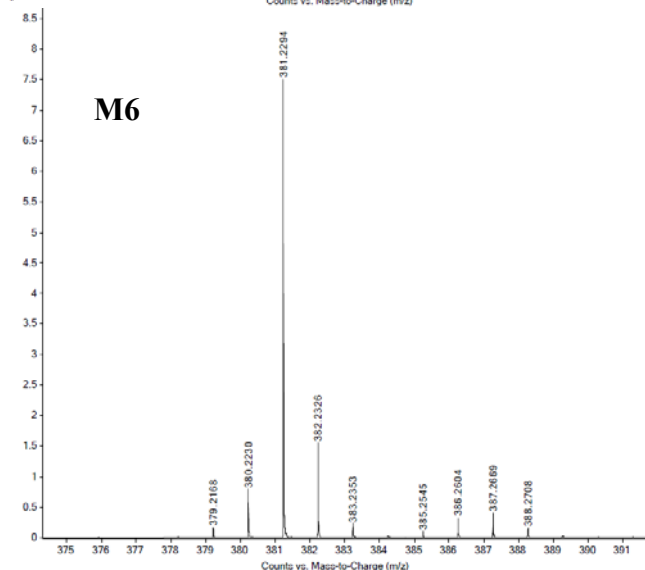

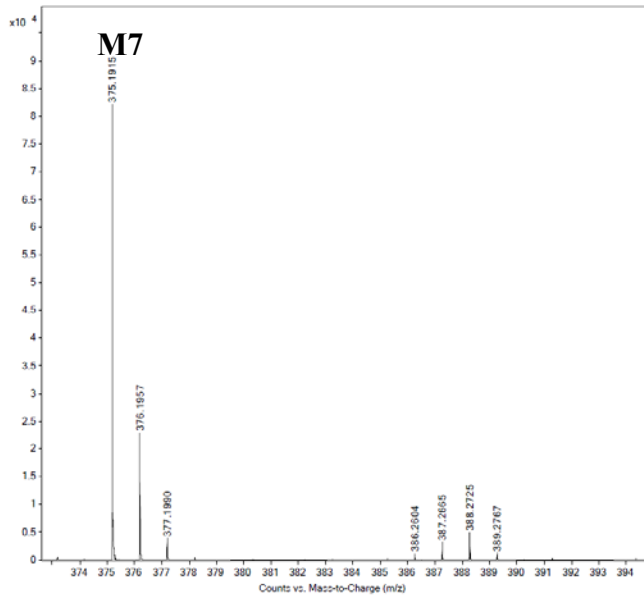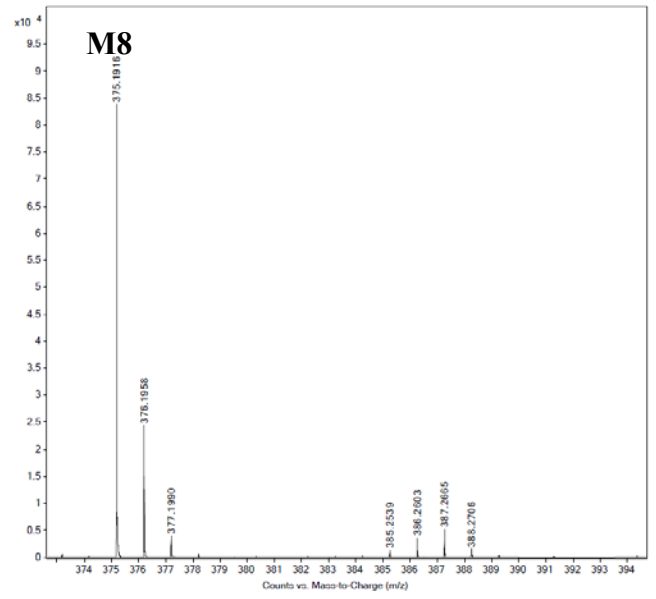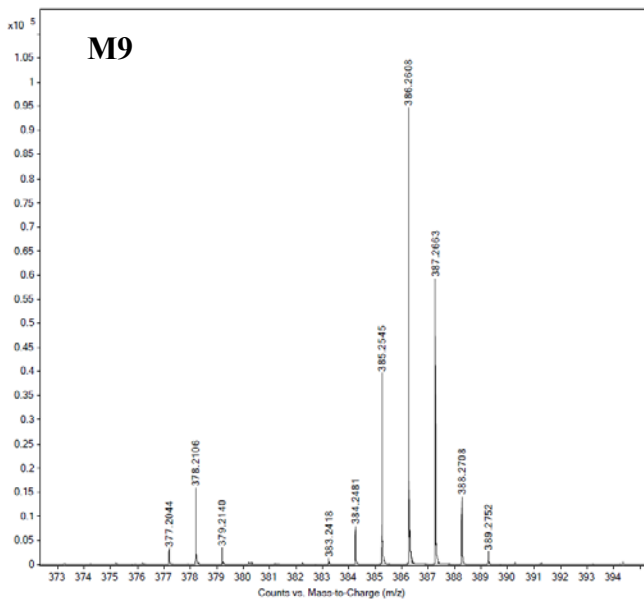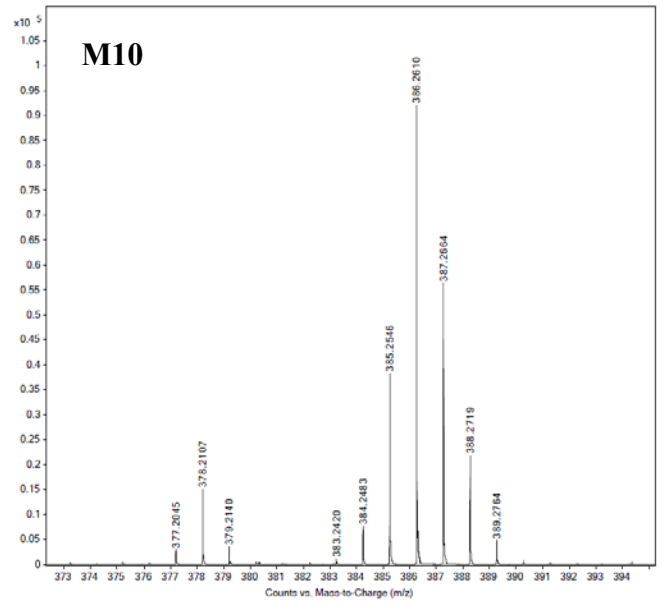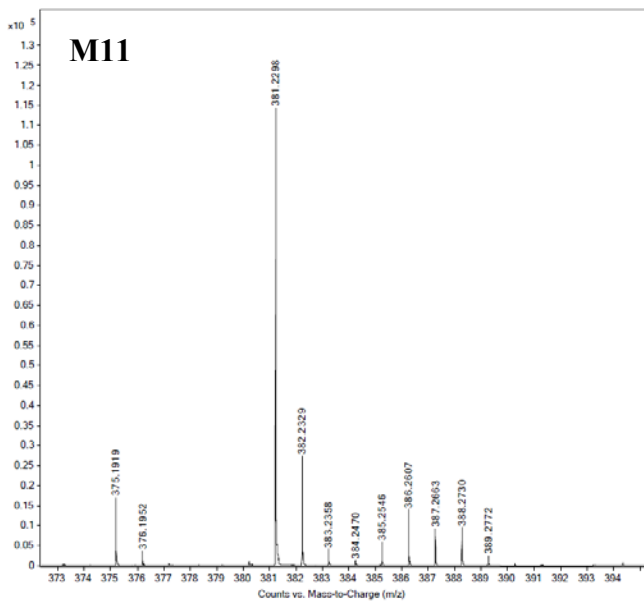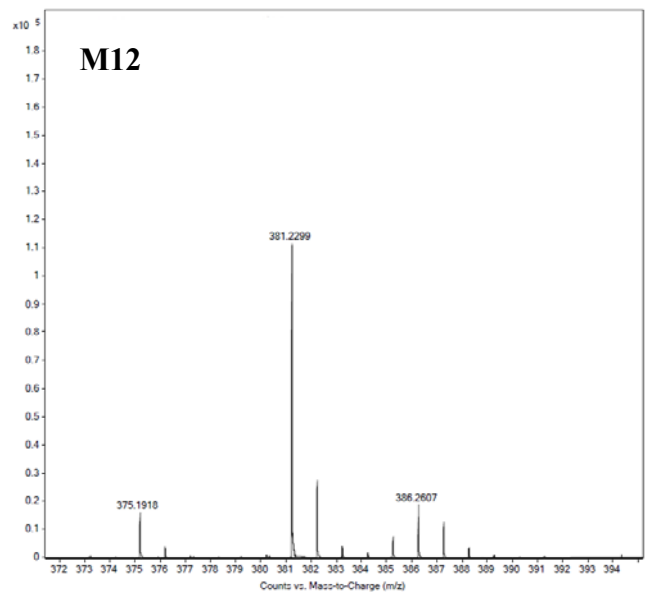

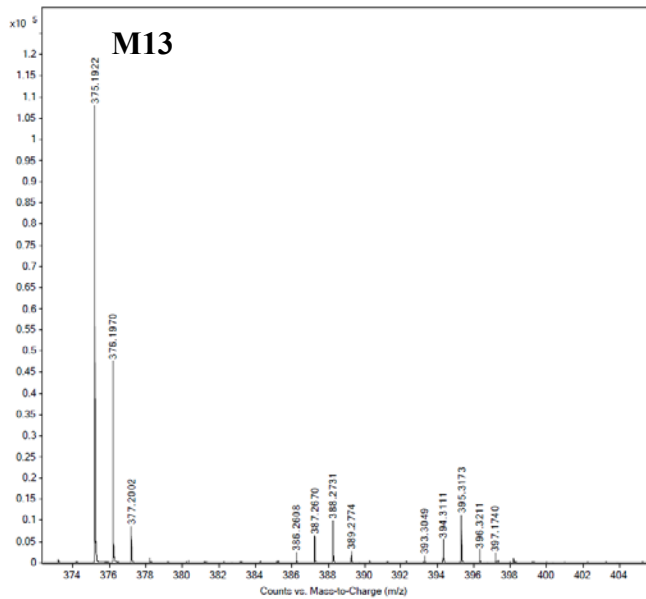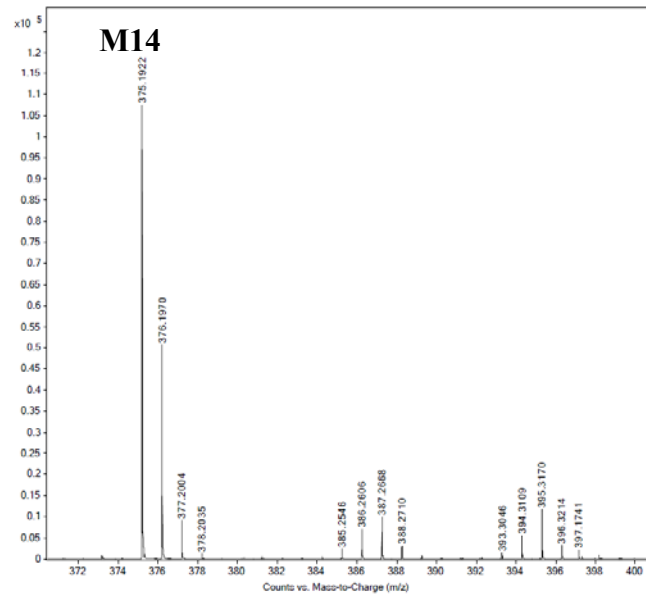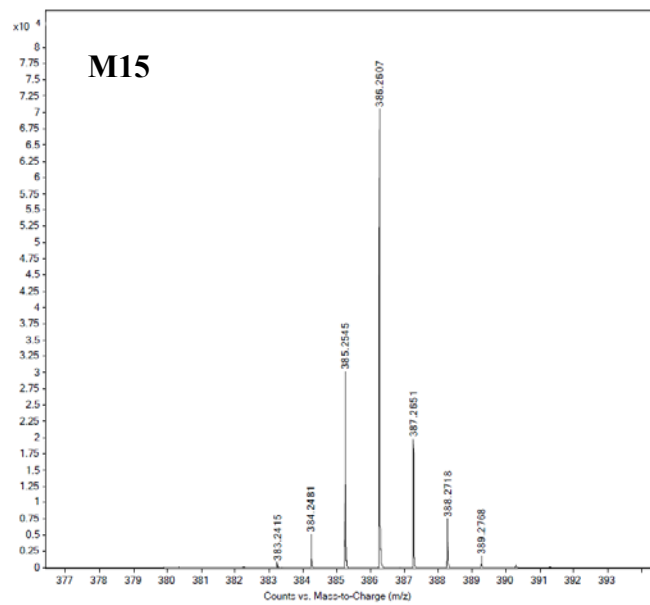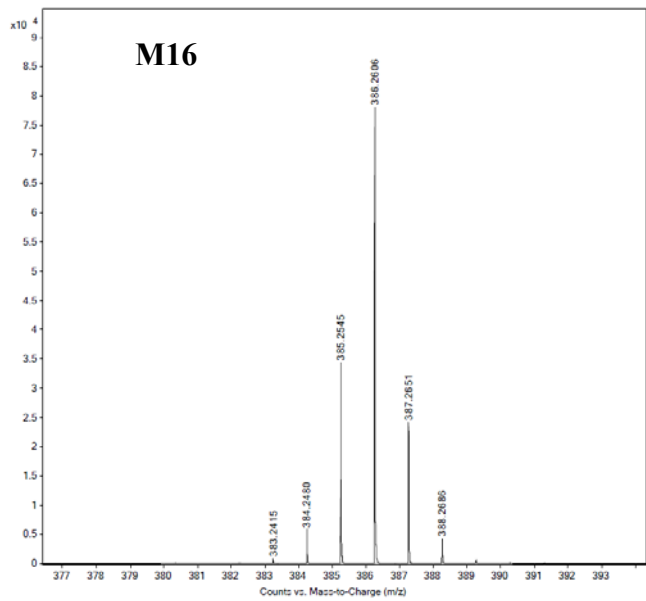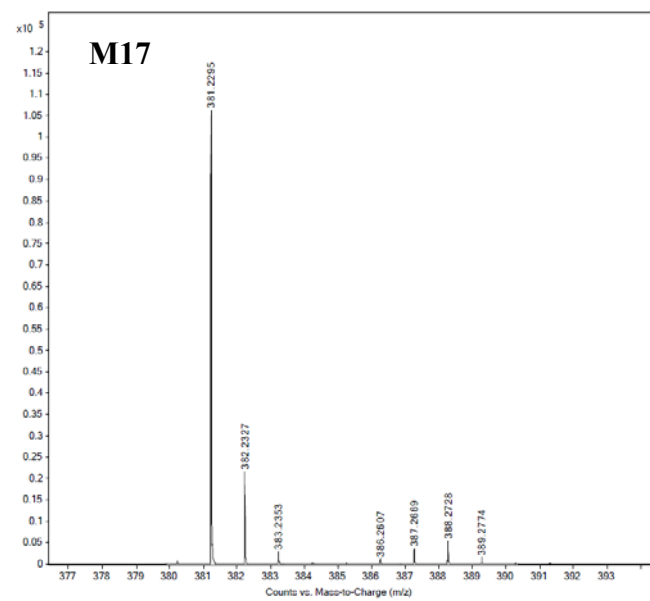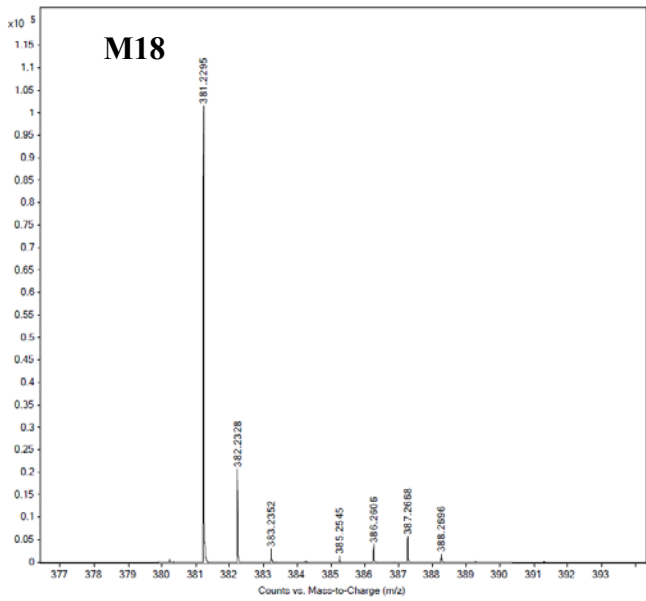

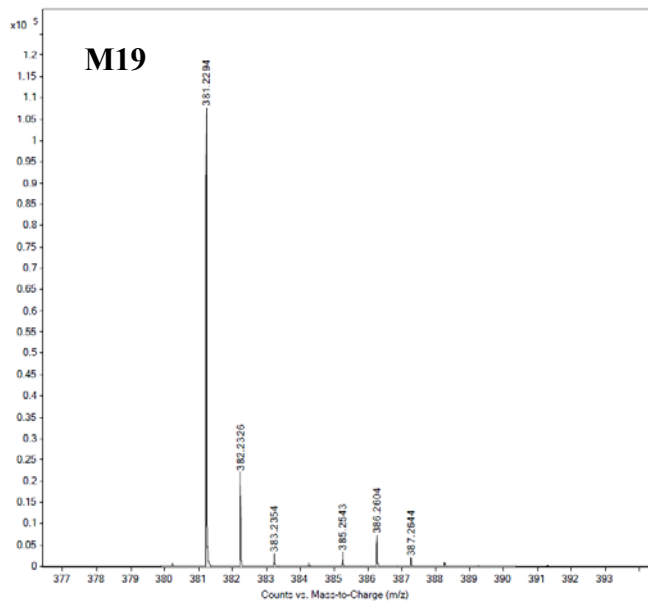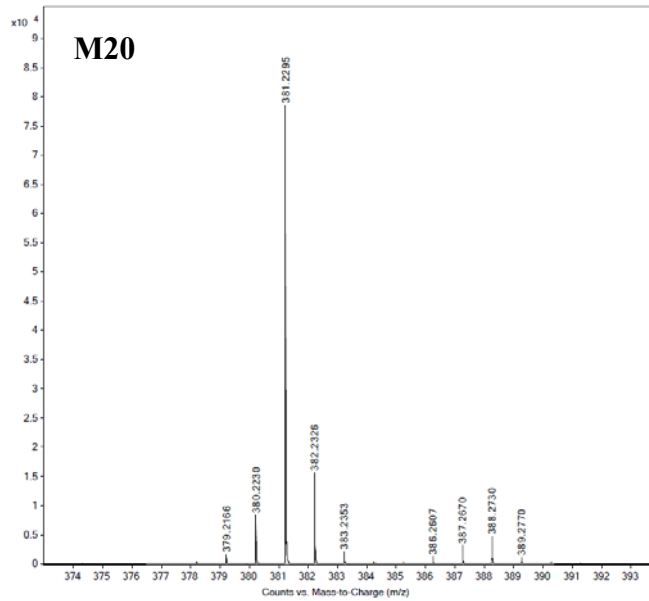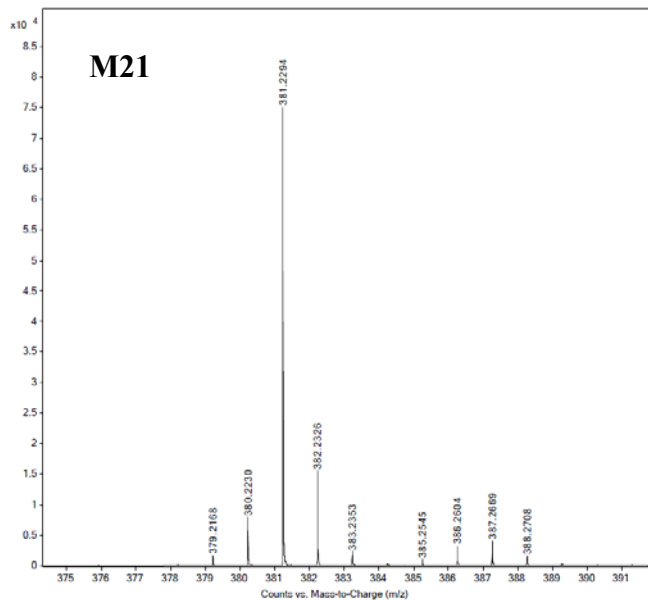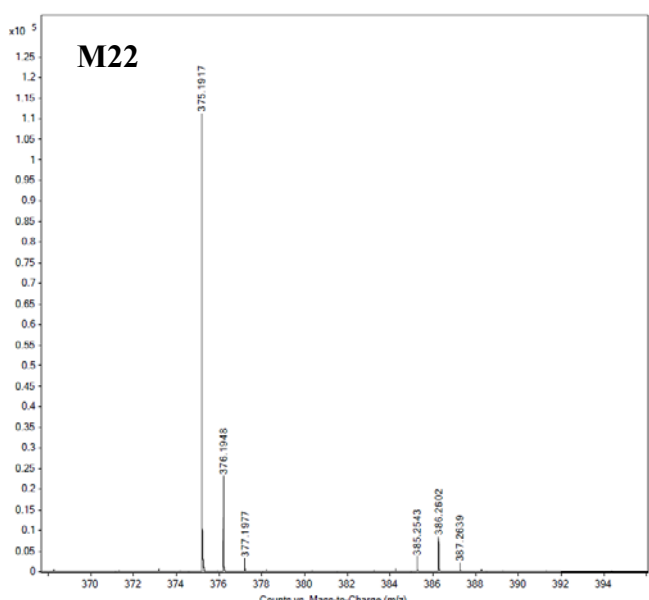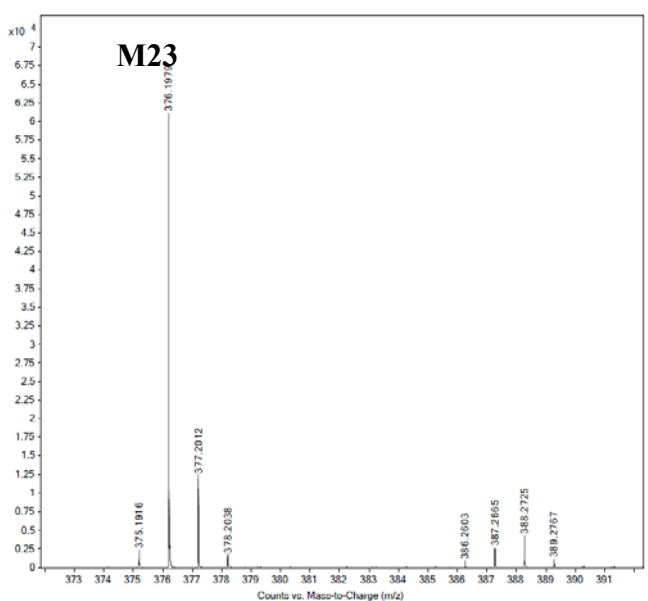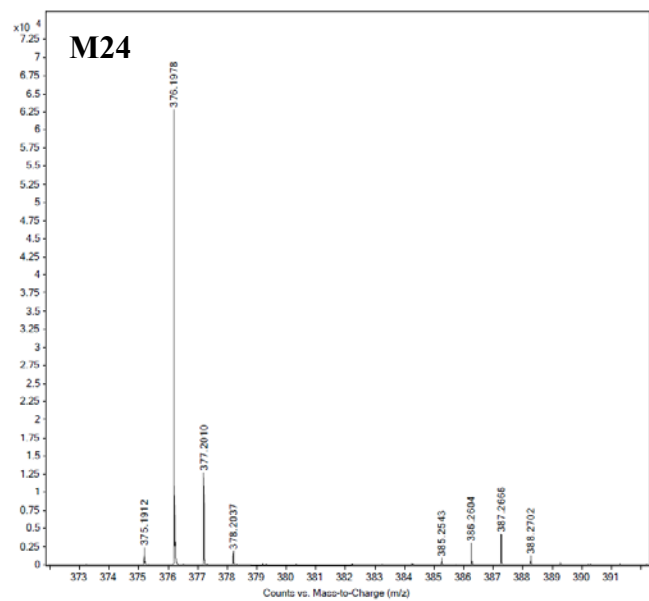

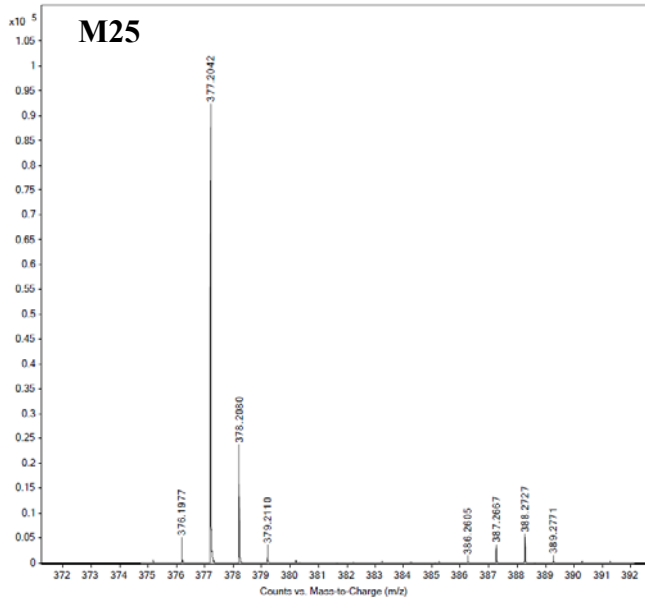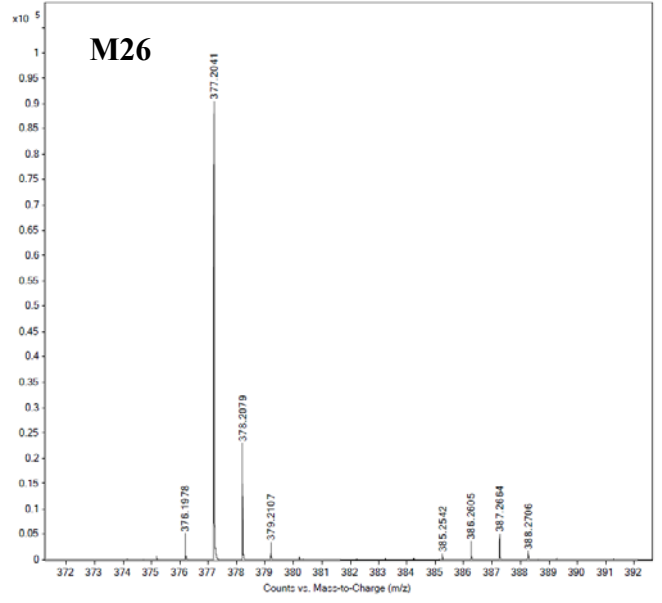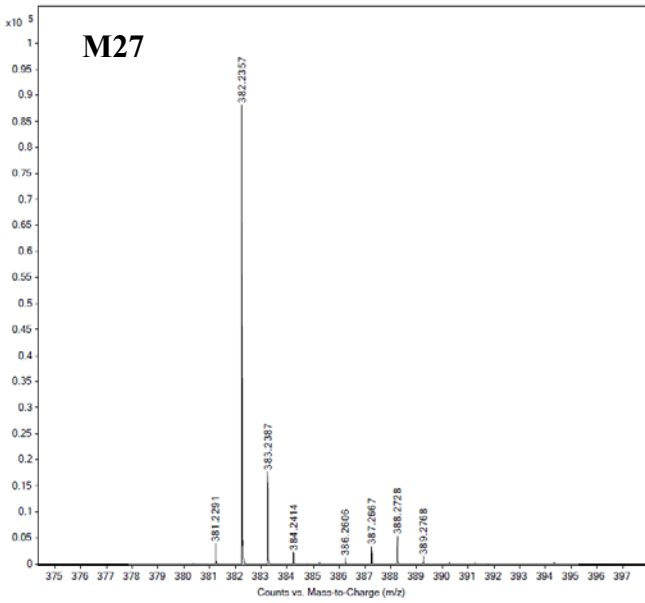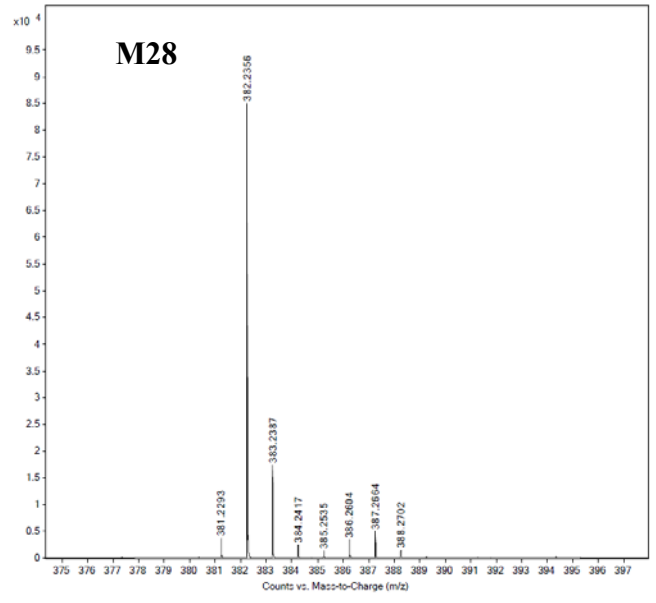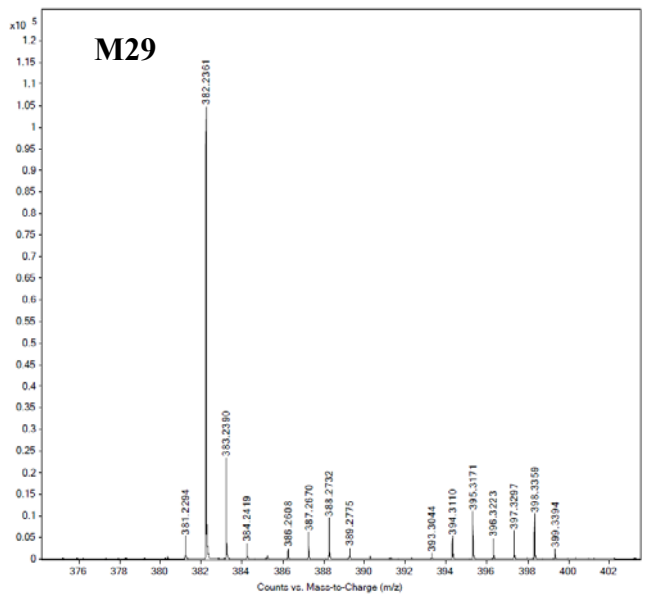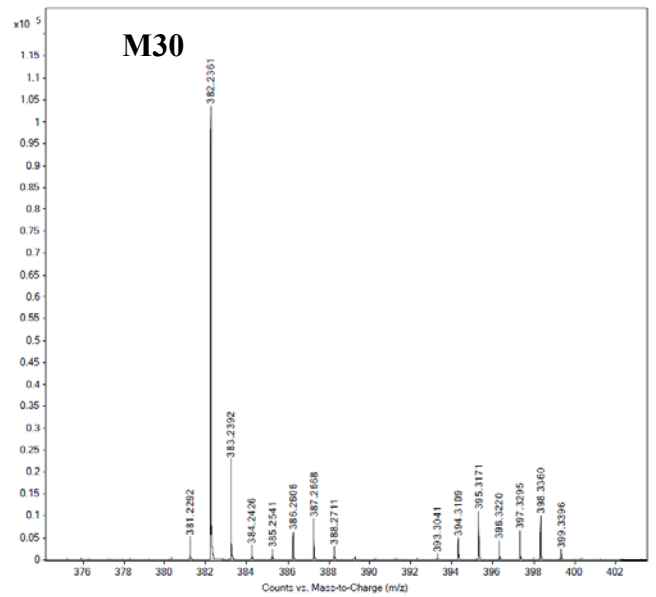

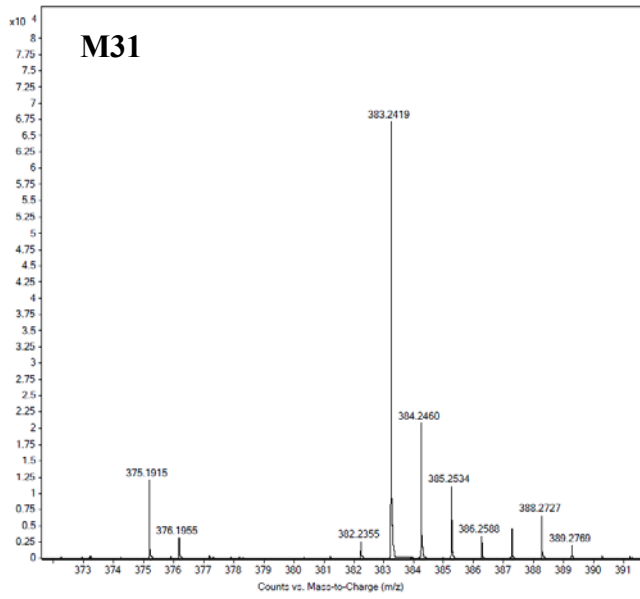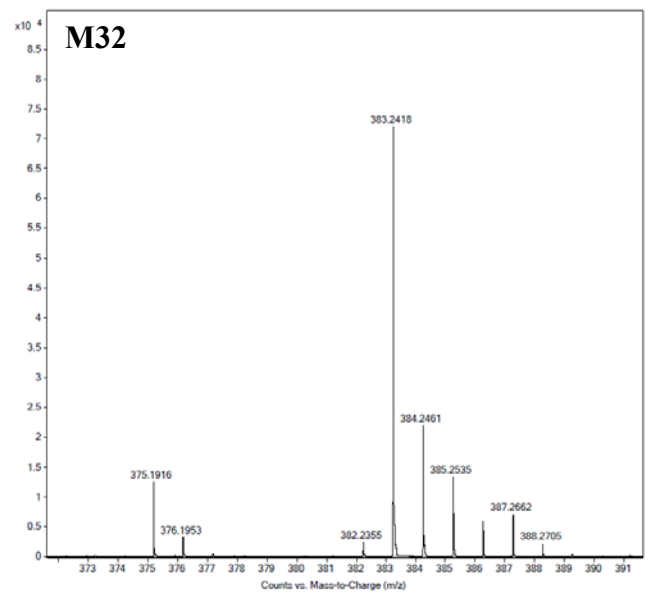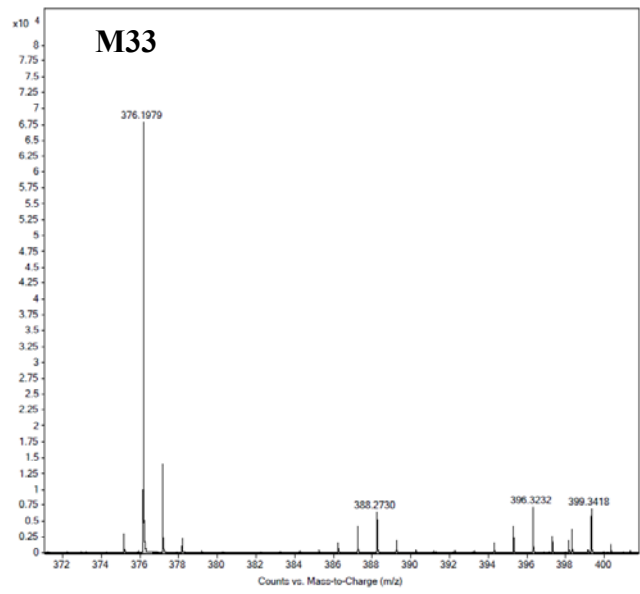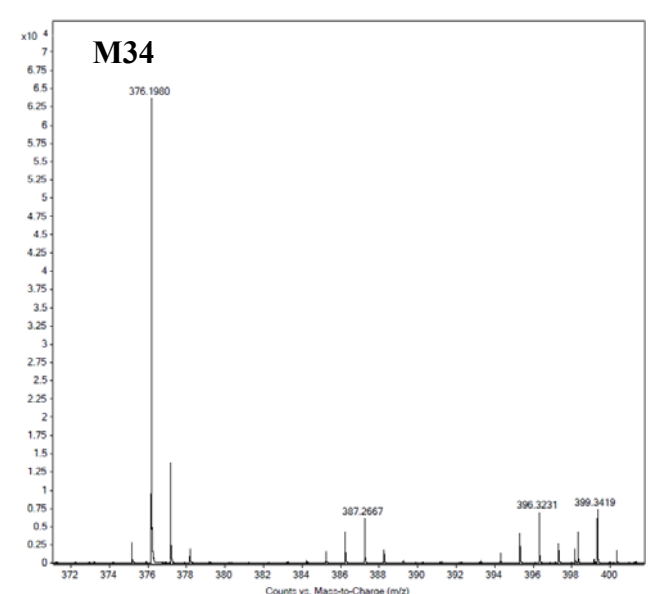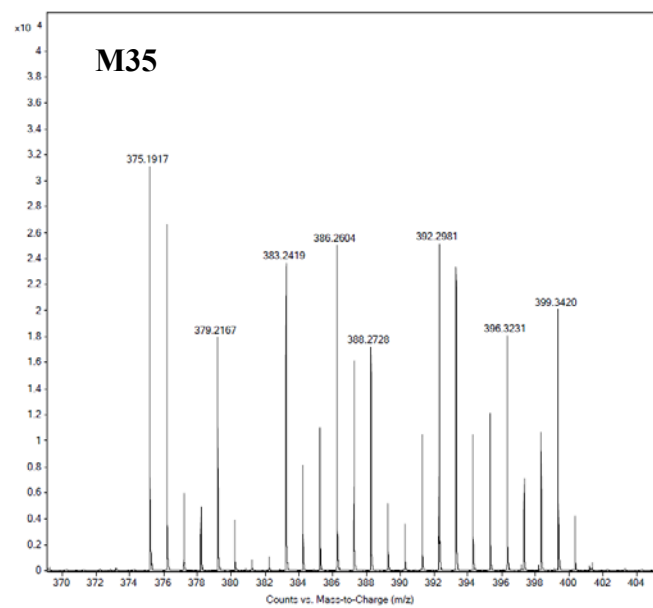

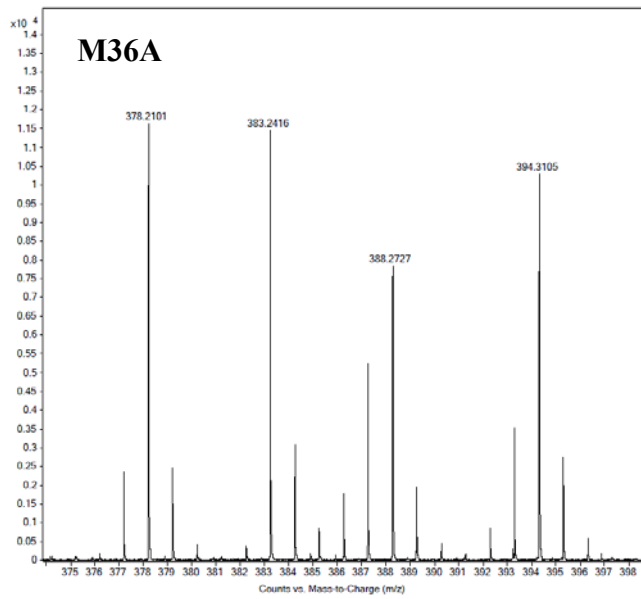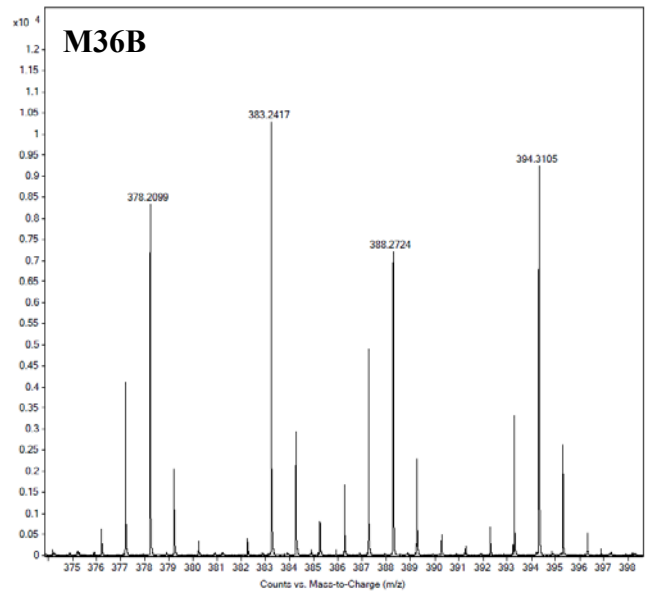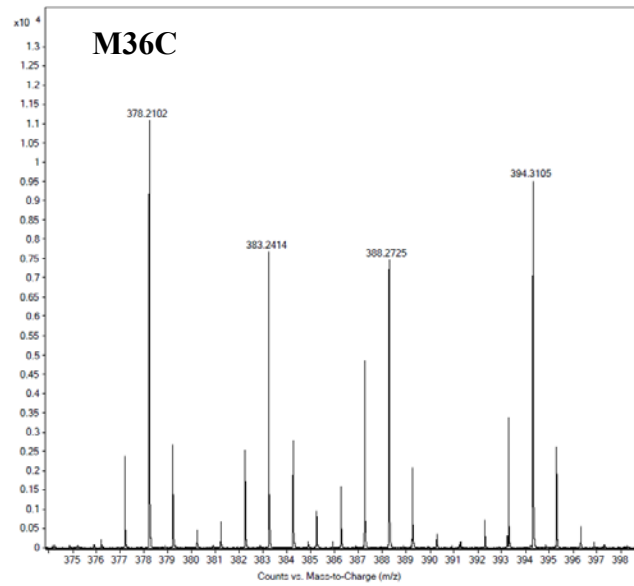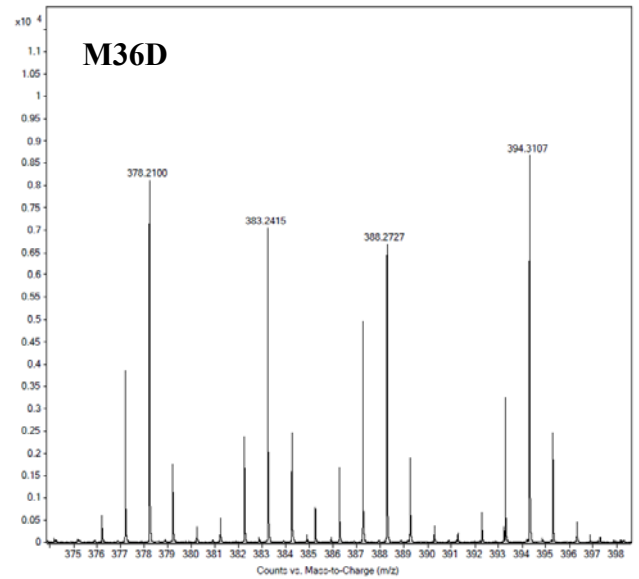



#### 4.6 Amide coupling: procedure, HRMS measurements

##### Synthesis of deuterated 8-acetamido-*N*-benzyl-4,6-bis(3-methoxypropyl)quinoline-2-carboxamide mixture for HRMS analysis

A 20 mL, screw-cap vial equipped with a magnetic stirring bar was filled with a mixture of 11.60 mg **8-acetamido-4,6-bis(3-methoxypropyl)quinoline-2-carboxylic acid** (0.28 equiv., 0.0310 mmol), 9.92 mg **8-acetamido-4,6-bis[3-(trideuteriomethoxy)propyl]quinoline-2-carboxylic acid** (0.24 equiv., 0.0261 mmol), 10.16 mg **3-deuterio-8-[(2,2,2-trideuterioacetyl)amino]-4,6-bis[3-(trideuteriomethoxy)propyl]quinoline-2-carboxylic acid** (0.24 equiv., 0.0264 mmol), 10.12 mg **3-deuterio-4,6-bis[1,1,2,2-tetradeuterio-3-(trideuteriomethoxy)propyl]-8-[(2,2,2-trideuterioacetyl)amino]quinoline-2-carboxylic acid** (0.24 equiv., 0.0258 mmol) (**M37**), 62.8 mg benzotriazol-1-yloxy-tris(dimethylamino)phosphonium, hexafluorophosphate (1:1) (1.3 equiv., 0.142 mmol), and 38  $\mu$ L DIPEA (2.0 equiv., 0.2187 mmol) and 3.29 mL dry, degassed DCM. The mixture was stirred at RT for 30 min, then 21.5 mg **1-naphthylmethanamine** (2.0 equiv., 0.2187 mmol) was added and the reaction mixture was stirred for further 30 min, until full conversion was observed. The mixture was concentrated *in vacuo*. Then the crude product was purified *via* RP-HPLC using 1% aq. HCOOH solution and MeCN as eluents to yield 28 mg differently deuterated mixture of **8-acetamido-*N*-benzyl-4,6-bis(3-methoxypropyl)quinoline-2-carboxamide**. (**M38**)

**Table S8. Peak areas of [M+H]<sup>+</sup> masses of the measured carboxamide mixture (M37) in HRMS spectra**

|                 | 375      | 376     | 377    | 378    | 379    | 380    | 381      | 382     | 383     | 384     | 385      | 386     | 387    | 388    | 389    | 390    | 391     | 392     | 393     | 394     | 395    | 396    | 397 |
|-----------------|----------|---------|--------|--------|--------|--------|----------|---------|---------|---------|----------|---------|--------|--------|--------|--------|---------|---------|---------|---------|--------|--------|-----|
| integrate area  | 18129928 | 4041777 | 644526 | 114025 | 57289  | 165453 | 13711766 | 3165833 | 1218057 | 4138079 | 11032209 | 2491994 | 434549 | 100996 | 95435  | 313792 | 1337414 | 4212976 | 9006071 | 3243952 | 969887 | 260191 | 0   |
| integrate ratio | 0.2298   | 0.0512  | 0.0082 | 0.0014 | 0.0007 | 0.0021 | 0.1738   | 0.0401  | 0.0154  | 0.0525  | 0.1398   | 0.0316  | 0.0055 | 0.0013 | 0.0012 | 0.0040 | 0.0170  | 0.0534  | 0.1142  | 0.0411  | 0.0123 | 0.0033 | 0   |

**Table S9. Peak integrate ratios of [M+H]<sup>+</sup> masses of the calculated and measured amine in HRMS spectra**

|                               | 158    | 159    | 160    | 161    |
|-------------------------------|--------|--------|--------|--------|
| Calculated<br>integrate ratio | 0.8834 | 0.1101 | 0.0063 | 0.0002 |
| Measured<br>integrate ratio   | 0.8821 | 0.1089 | 0.0082 | 0.0007 |

**Table S10. Peak areas and integral ratios of [M+H]<sup>+</sup> masses of the calculated and measured adduct mixture (M38) in HRMS spectra**

|                               | 514      | 515      | 516     | 517    | 518    | 519    | 520      | 521     | 522     | 523     | 524      | 525     | 526     | 527    | 528    | 529    | 530     | 531     | 532      | 533     | 534     | 535    | 536    |
|-------------------------------|----------|----------|---------|--------|--------|--------|----------|---------|---------|---------|----------|---------|---------|--------|--------|--------|---------|---------|----------|---------|---------|--------|--------|
| calculated<br>integrate ratio | 0.1959   | 0.0679   | 0.0142  | 0.0027 | 0.0009 | 0.0019 | 0.1484   | 0.0525  | 0.0188  | 0.0468  | 0.1249   | 0.0421  | 0.0092  | 0.0020 | 0.0012 | 0.0035 | 0.0149  | 0.0474  | 0.1032   | 0.0476  | 0.0158  | 0.0045 | 0      |
| measured<br>integrate area    | 28909460 | 11141681 | 2293640 | 444756 | 136901 | 256423 | 23058821 | 8660401 | 2998798 | 7426119 | 19972260 | 6918664 | 1512908 | 354659 | 297538 | 609663 | 2300787 | 7266433 | 15978770 | 7426798 | 2500198 | 733353 | 0      |
| measured<br>integrate ratio   | 0.1912   | 0.0737   | 0.0152  | 0.0029 | 0.0009 | 0.0017 | 0.1525   | 0.0573  | 0.0198  | 0.0491  | 0.1321   | 0.0458  | 0.0100  | 0.0023 | 0.0020 | 0.0040 | 0.0152  | 0.0481  | 0.1057   | 0.0491  | 0.0165  | 0.0049 | 0.0000 |

**Calculated NDP for similarity between calculated and measured adduct mixture: 0.99934.**

**Figure S4. HRMS of compounds M37-M38**

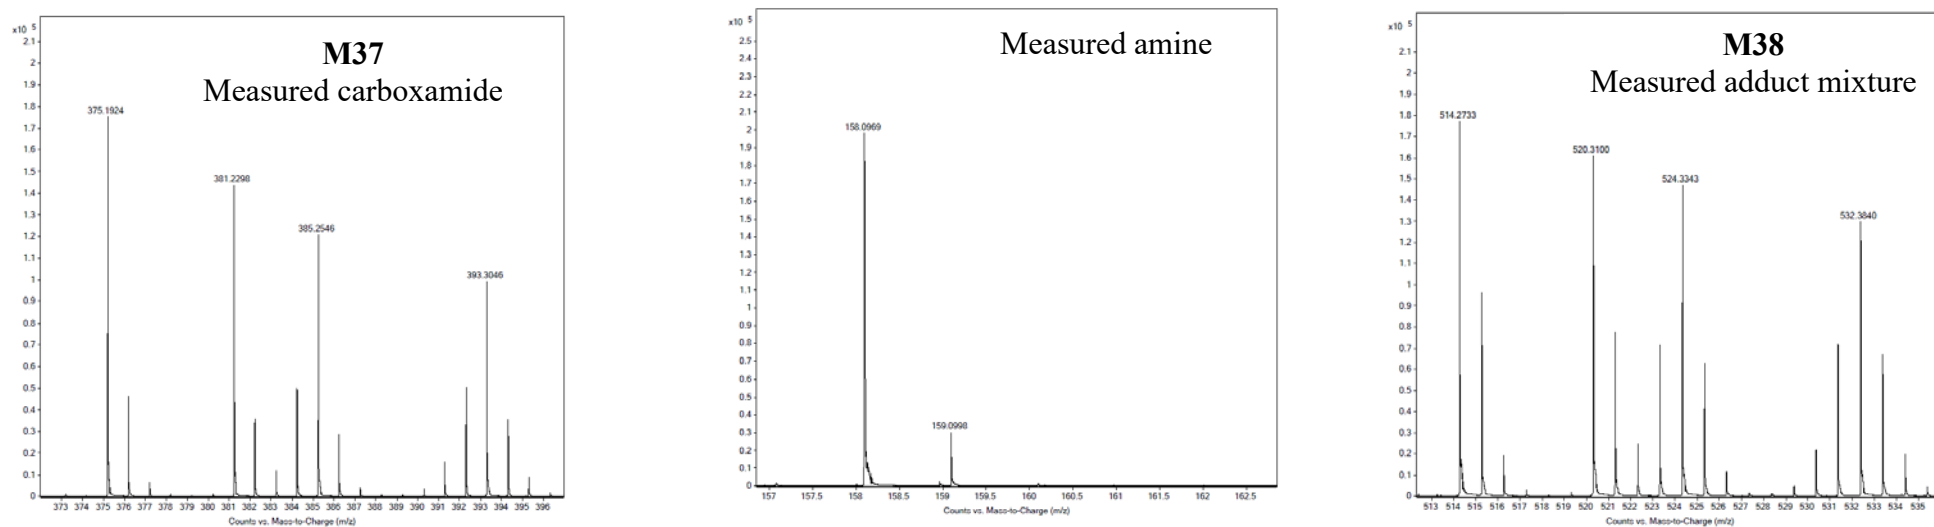

Supplement: d4sc03519d1.pdf [file d4sc03519d1.pdf]
